# Supplementary material for: Transcriptional Dynamics During Human Adipogenesis and Its Link to Adipose Morphology and Distribution
Source: Oxford University Press journal article supplement (doi:10.2337/db16-0631), 2016-11-01
Supplement: db160631supplementarydata3.xlsx [file db160631supplementarydata3.xlsx]

## Sheet: 2A Kmeans all genes
group1_transient	group2_latedownreg	group3_lateinduced	group4_earlydownreg	group5_lateupreg
A1BG	AAGAB	AAAS	A4GALT	AACS
A1BG-AS1	AARS	ABCA1	ABCC4	ABCA2
AADAC	AATF	ABCA7	ABI1	ABCB10
AASS	ABCC1	ABCB8	ABI2	ABCB6
ABAT	ABCC3	ABCD2	ABL2	ABCD1
ABCA5	ABHD13	ABCD4	ABR	ABHD14A
ABCA6	ABHD2	ABCG1	ACAN	ABHD16A
ABCA8	ABLIM3	ABHD1	ACCS	ABHD3
ABCA9	ABTB1	ABHD15	ACD	ABHD5
ABCC5	ACBD3	ACAA1	ACTA2	ABHD6
ABCC9	ACBD6	ACAA2	ACTB	ABHD8
ABI3BP	ACIN1	ACACA	ACTG1	ACAD10
ABL1	ACOT7	ACACB	ACTN4	ACAD9
ABLIM1	ACOX3	ACAD11	ACTR3	ACADSB
ACE	ACTL6A	ACAD8	ACVR2A	ACAT1
ACPL2	ACTR10	ACADM	ADAM10	ACBD5
ACVRL1	ACTR2	ACADS	ADAM12	ACOT13
ADAMTS1	ACTR8	ACADVL	ADAM19	ACOX1
ADAMTS15	ACVR1	ACAP2	ADAMTS14	ACOX2
ADAMTS2	ADAM33	ACAT2	ADAMTS6	ACP2
ADAMTS4	ADAM9	ACBD4	ADAMTSL1	ACP6
ADAMTS5	ADAMTS10	ACER2	ADCY7	ACSL3
ADH1B	ADAMTS12	ACER3	ADD2	ACSL4
ADORA2B	ADAMTS7	ACHE	ADD3	ACTN1
ADRA1B	ADAR	ACLY	ADM	ADA
AFAP1L1	ADAT3	ACO1	ADM2	ADAMTSL4
AGAP1	ADCY3	ACO2	AEBP1	ADARB1
AGPAT6	ADD1	ACOT1	AGRN	ADAT2
AHCTF1	ADK	ACOT2	AHI1	ADCK1
AIMP2	ADSL	ACSF2	AHNAK	ADCK5
AKAP12	ADSS	ACSL1	AHNAK2	ADCY6
AKAP13	AEBP2	ACSL5	AHR	ADRA2A
AKNA	AFF1	ACSS2	AHRR	ADRBK1
AKR1C1	AFF4	ACTG2	AK5	ADRM1
ALDH1A3	AFMID	ACVR1C	AKAP2	AFAP1
ALOX15B	AGA	ACY1	AKT3	AFG3L2
AMPH	AGBL5	ACYP2	ALCAM	AGXT2L2
ANG	AGPAT1	ADAMTS18	ALDH3B1	AHCY
ANGPT1	AGPAT5	ADAMTS9	ALMS1	AK1
ANGPTL1	AGTRAP	ADAP1	ALPK2	AK3
ANKIB1	AHDC1	ADCK2	AMACR	AKAP8L
ANKRD10	AHSA2	ADCK3	AMOTL2	AKIRIN2
ANKRD13B	AIMP1	ADHFE1	ANAPC13	AKR1C2
ANKRD33B	AIP	ADIPOQ	ANKH	AKT2
ANTXR2	AKAP8	ADIPOR2	ANKRD28	ALDH16A1
AOX1	AKIP1	ADORA1	ANKRD37	ALDH2
APAF1	AKR1A1	ADRB2	ANLN	ALDH6A1
APBB2	AKT1S1	ADRBK2	ANP32E	ALDOC
APCDD1	AKTIP	AES	ANXA11	ALG14
APOD	ALDH18A1	AGAP11	ANXA2	ALG5
APOL1	ALDH1L2	AGMO	ANXA2P2	ALKBH5
APOL2	ALPK1	AGPAT2	ANXA2P3	ANAPC16
APOL3	ALYREF	AGPAT4	AP1S2	ANGPTL2
ARF1	AMMECR1	AGPAT9	APC	ANK2
ARHGAP6	AMPD2	AGT	APCDD1L	ANKRD13D
ARHGEF19	AMZ2	AIFM1	APLP1	ANKRD16
ARHGEF26	ANAPC4	AIFM2	ARFGEF1	ANKRD26
ARNTL	ANAPC5	AIG1	ARHGAP21	ANKRD35
ARSK	ANGEL2	AIM1	ARHGAP22	ANKRD40
ASB13	ANKLE2	AK4	ARHGAP24	ANKRD46
ASCC1	ANKRD12	AKAP1	ARHGAP31	ANO8
ASH1L	ANKRD13A	AKR1B1	ARHGEF10	AP1B1
ASPHD1	ANKRD13C	AKR1C3	ARHGEF12	APBB3
ATF6B	ANKRD17	AKR1E2	ARID5A	APEX2
ATOH8	ANKRD27	AKT1	ARL13B	APH1B
B3GALNT2	ANKRD49	ALAS1	ARL4A	APIP
BAIAP2	ANKRD50	ALDH1B1	ARL4C	APOM
BCAT2	ANP32A	ALDH1L1	ARMC9	APOPT1
BCHE	ANP32B	ALDH3A2	ARMCX2	APPBP2
BCL2L11	ANPEP	ALDH3B2	ARNTL2	ARAP1
BCL6	ANTXR1	ALDH4A1	ARPC1B	ARF3
BCL7B	ANXA4	ALDH5A1	ARPC5	ARHGAP20
BMP1	ANXA5	ALDH9A1	ARRDC2	ARHGAP23
BMPER	ANXA6	ALDOA	ARRDC3	ARL6
BTBD11	ANXA7	ALG12	ARSJ	ARL6IP1
BTG1	AP1AR	ALG9	ASAP1	ARL6IP6
C11orf2	AP1S1	ALPL	ASAP2	ARL8A
C11orf96	AP2B1	AMBRA1	ASNS	ARMC6
C12orf10	AP2M1	AMDHD2	ASPN	ASPH
C12orf24	AP3B1	AMIGO2	ATAD2	ATE1
C12orf47	AP3D1	ANGPT4	ATHL1	ATG3
C12orf57	AP3S1	ANGPTL4	ATL1	ATP10A
C12orf76	AP4E1	ANKRD9	ATP11C	ATP13A2
C13orf33	APBB1	ANO6	ATP1B1	ATP1B3
C14orf93	APEH	ANXA1	ATP2A2	ATP2B4
C17orf39	APEX1	AOC2	ATP2B1	ATP2C1
C17orf58	API5	AOC3	ATP6V1G2	ATP5A1
C17orf76-AS1	APLP2	AP3B2	ATP6V1G2-DDX39B	ATP5B
C18orf56	APOBEC3C	APBB1IP	ATP8B1	ATP5C1
C1GALT1C1	APP	APLN	ATP8B2	ATP5G2
C1R	APPL1	APOC1	ATXN1	ATP5J
C1S	APPL2	APOE	AURKA	ATP5J2-PTCD1
C1orf122	ARCN1	APOL6	AXL	ATP5L
C1orf123	ARF4	APOO	B3GALNT1	ATP5S
C1orf21	ARF5	AQP1	B4GALT1	ATP6V0B
C1orf63	ARF6	AQP11	B4GALT4	ATP6V0E2
C20orf111	ARFGAP1	AQP3	BAALC	ATP6V1A
C20orf194	ARFGAP3	AQP7	BACE2	ATP6V1B2
C21orf63	ARFIP2	ARG2	BAG2	ATP6V1D
C22orf26	ARHGAP1	ARGLU1	BAIAP2L2	ATP9A
C3orf39	ARHGAP10	ARHGAP42	BASP1	ATPAF2
C4orf34	ARHGAP12	ARHGEF6	BBX	ATXN2L
C5orf30	ARHGAP17	ARHGEF7	BCAR1	AUP1
C5orf38	ARHGAP18	ARL6IP5	BCAS4	AURKAIP1
C5orf4	ARHGAP28	ARRB1	BCAT1	AVPI1
C6orf48	ARHGDIA	ASAH1	BCL2L12	B3GALT6
C9orf85	ARHGEF1	ASF1B	BCL3	B3GNT1
CALCOCO2	ARHGEF17	ASH2L	BCOR	B3GNT2
CAMLG	ARHGEF2	ASPA	BDKRB1	B4GALT3
CAPN10	ARID1B	ASS1	BDKRB2	B9D1
CBS	ARID5B	ATF3	BEND6	BAG1
CCDC101	ARL1	ATG4D	BHLHE40	BCAR3
CCDC80	ARL2BP	ATP1A2	BICC1	BCDIN3D
CCDC86	ARL3	ATP5G3	BIRC5	BCKDHA
CD34	ARL4D	ATP6V1E1	BMF	BCKDHB
CD81	ARL5B	ATPAF1	BMI1	BCKDK
CD82	ARMC2	AZGP1P1	BMPR2	BCL2L1
CDIPT	ARMC5	B3GNT5	BNC1	BCL7A
CDK14	ARMC7	BAG5	BNC2	BDH1
CDKN1C	ARMC8	BAI2	BOC	BET1
CDKN2B	ARMCX1	BAMBI	BPGM	BIN1
CDON	ARMCX6	BBOX1	BRCC3	BLCAP
CELF2	ARNT	BCAP31	BRE	BLVRA
CENPN	ARPC1A	BCL2	BST1	BOLA1
CEP192	ARPC2	BCL2L13	BTBD19	BOLA3
CEP63	ARPC3	BEST1	BTG2	BRAF
CEP68	ARPC4	BHLHE41	BVES	BRF1
CEP95	ARPC5L	BHMT2	C10orf10	BRF2
CEP97	ARRB2	BLVRB	C10orf125	BRI3BP
CERS6	ARSB	BNIP3	C11orf51	BSG
CHD9	ASAH2B	BOK	C12orf75	BTBD6
CHEK1	ASAP3	BPHL	C15orf41	BTF3L4
CHEK2	ASB1	BRP44	C16orf45	BTG3
CHMP1B	ASB3	BRP44L	C1GALT1	BTN3A2
CHST11	ASCC3	BSCL2	C1QTNF3	BTRC
CHST12	ASF1A	BTD	C1QTNF6	C10orf26
CHST2	ASL	C10orf116	C1orf198	C10orf46
CHST3	ASPSCR1	C11orf48	C1orf51	C11orf67
CHST7	ASUN	C11orf71	C20orf94	C11orf84
CILP	ATAD3A	C14orf109	C4orf33	C11orf95
CILP2	ATAT1	C14orf180	C5orf13	C12orf4
CLDN7	ATF1	C15orf17	C6orf72	C12orf45
CLEC11A	ATF4	C16orf7	C7orf10	C12orf73
CLEC3B	ATF5	C16orf89	C7orf50	C13orf15
CLK1	ATF6	C17orf53	C8orf58	C14orf1
CLN8	ATF7	C17orf59	C9	C15orf24
CNBP	ATG12	C17orf63	C9orf102	C15orf40
CNOT8	ATG2B	C19orf12	C9orf3	C15orf61
CNR1	ATG9A	C19orf60	C9orf30	C16orf80
CNRIP1	ATL3	C19orf80	C9orf41	C17orf61
COL11A1	ATM	C1QTNF1	CABIN1	C17orf81
COL18A1	ATP10D	C1orf115	CALD1	C17orf89
COL3A1	ATP13A3	C1orf38	CAP1	C19orf24
COL5A2	ATP1A1	C20orf132	CAP2	C19orf52
COL6A3	ATP6V0C	C20orf3	CAPG	C1orf201
COMMD3	ATP6V1F	C20orf30	CAPS	C1orf213
COPS8	ATP6V1H	C2orf84	CASC5	C1orf43
CORO2B	ATP7A	C2orf89	CBFB	C1orf50
CORO6	ATPIF1	C3	CC2D1A	C1orf53
CPM	ATRX	C3orf37	CCBE1	C1orf56
CPNE7	ATXN10	C5orf32	CCDC136	C20orf24
CRISPLD2	ATXN3	C5orf35	CCDC34	C20orf27
CRLF1	ATXN7L2	C6orf106	CCDC6	C20orf7
CRTAP	AVEN	C6orf136	CCDC71L	C21orf2
CRTC1	AVL9	C6orf57	CCL2	C21orf33
CSDC2	AZI1	C8orf40	CCNA2	C22orf13
CSDE1	AZI2	C8orf55	CCNB1	C22orf29
CSF1	B2M	C9orf25	CCNB2	C22orf32
CST3	B3GALTL	C9orf95	CCND1	C22orf39
CTSF	B3GNT9	CA2	CCRL1	C2CD2
CTSH	B4GALT2	CA3	CD109	C2orf18
CTSK	BABAM1	CA5B	CD151	C2orf43
CUEDC1	BACE1	CABLES1	CD2AP	C2orf47
CUL4B	BACH1	CADM3	CD44	C2orf68
CUTC	BAG3	CALB2	CD74	C2orf76
CXCL2	BAG6	CAMK1	CD9	C3orf23
CYBASC3	BANF1	CAMSAP1	CDA	C3orf55
CYHR1	BANP	CASP7	CDC20	C3orf78
CYP4B1	BAX	CAT	CDC25B	C4orf32
DCLK1	BAZ1B	CAV2	CDC42EP1	C4orf52
DCN	BAZ2A	CCDC50	CDC42EP3	C5orf45
DCUN1D3	BBC3	CCDC69	CDC42EP5	C5orf56
DDIT4	BBIP1	CCND2	CDCA3	C5orf62
DDX17	BBS1	CCND3	CDCA7	C6orf108
DDX6	BBS10	CCT6P3	CDH11	C6orf226
DGUOK	BBS4	CD14	CDH13	C6orf228
DIABLO	BBS7	CD302	CDH2	C7orf30
DIRAS3	BCAP29	CD36	CDK1	C7orf41
DKK1	BCAS2	CD52	CDK2	C7orf43
DLG1	BCL10	CD83	CDKN3	C7orf58
DOCK5	BCL7C	CDC34	CDT1	C7orf59
DPH5	BCL9L	CDK2AP2	CEND1	C8orf38
DPT	BCLAF1	CDK9	CENPF	C8orf82
DTNA	BDH2	CDKN2C	CENPH	C9orf116
EBF1	BEX4	CDO1	CENPM	C9orf123
ECE1	BGN	CDR1	CENPW	C9orf156
EDNRB	BID	CEBPA	CEP55	C9orf16
EEF2	BIN3	CEPT1	CEP85L	C9orf23
EFCAB7	BIVM	CES1	CFL1	C9orf5
EGR1	BLOC1S1	CES2	CH25H	C9orf91
EGR3	BLOC1S2	CFD	CHAC1	CACNB3
EID3	BLZF1	CHCHD10	CHD3	CACYBP
ELN	BMS1	CHI3L2	CHI3L1	CALCRL
ENTPD6	BOD1L	CHPT1	CHSY1	CANX
EP300	BPTF	CHRDL1	CKAP4	CAPN5
EPB41L4A-AS1	BRD4	CHST8	CLCNKA	CAST
EPHA4	BRD8	CIDEC	CLDN11	CAV1
EPHB1	BRI3	CITED1	CLIC1	CBR4
EPHB6	BROX	CITED4	CLIC3	CBX4
ETV6	BTAF1	CKB	CLIP2	CCBL2
EVL	BTBD7	CKMT2	CNIH3	CCDC106
EYA2	BTN2A1	CLCN3	CNKSR3	CCDC107
F10	BUB3	CLCN4	CNN1	CCDC109B
FAM107A	BUD31	CLDN15	CNN2	CCDC126
FAM109A	BZW1	CLDN23	CNNM4	CCDC127
FAM109B	C10orf118	CLMN	CNPY4	CCDC134
FAM110B	C10orf12	CLMP	CNST	CCDC159
FAM164A	C10orf54	CLPTM1	COL12A1	CCDC167
FAM171B	C11orf1	CLYBL	COL13A1	CCDC36
FAM198A	C11orf24	CMTM7	COL14A1	CCDC51
FAM198B	C11orf49	CMYA5	COL1A1	CCDC56
FAM200A	C11orf70	CNDP2	COL1A2	CCDC75
FAM20A	C12orf23	CNOT10	COL21A1	CCDC82
FAM46A	C12orf32	CNTFR	COL7A1	CCDC85B
FAM46B	C12orf44	COL4A1	COL8A1	CCDC92
FAM55C	C12orf52	COL4A2	COLEC12	CCM2
FAM65C	C12orf65	COL5A3	COMMD7	CCNH
FAM70B	C14orf101	COQ10A	COMMD8	CCPG1
FAM91A1	C14orf119	COQ6	COMP	CCRN4L
FBLN1	C14orf129	COX17	COTL1	CCT4
FBLN2	C14orf135	CPB1	CPT1A	CD46
FBXL8	C14orf149	CPEB1	CPXM2	CD63
FBXO32	C14orf37	CPEB4	CRABP2	CD97
FEM1B	C14orf43	CPNE2	CREB3	CDC42EP4
FEM1C	C14orf45	CPT1B	CREB3L1	CDHR3
FERMT2	C15orf39	CPT2	CRIM1	CDK5RAP1
FGF18	C15orf44	CRELD1	CRIP1	CDKN2AIPNL
FGFR1	C16orf53	CRLS1	CRIP2	CDRT1
FHOD3	C16orf62	CS	CRYAB	CDS2
FIGF	C16orf72	CSAD	CSMD2	CDV3
FKBP5	C16orf87	CXCL14	CSRP1	CDYL2
FKBP7	C17orf49	CXCR7	CSRP2	CEBPG
FLJ39653	C17orf62	CYB5A	CTGF	CECR5
FMOD	C17orf79	CYP27A1	CTHRC1	CELF1
FNDC3A	C17orf85	CYP4F12	CTNNAL1	CENPA
FOXO1	C19orf29	DBI	CXCL1	CENPV
FOXO3	C19orf40	DDIT3	CXCL6	CFLAR
FPR1	C19orf66	DDIT4L	CYB561	CHCHD1
FSTL1	C1QTNF5	DECR1	CYP1B1	CHCHD3
FSTL3	C1RL	DEFB1	CYR61	CHCHD5
FTH1P3	C1orf131	DERL1	CYTH3	CHCHD7
FUT4	C1orf144	DGAT1	DAB2	CHKA
FUT8	C1orf31	DGAT2	DACT1	CHMP4A
GAA	C1orf54	DHCR24	DBN1	CHMP7
GAL3ST4	C1orf55	DHCR7	DCBLD1	CHP
GALNTL2	C1orf85	DHDDS	DCK	CIAO1
GAS1	C1orf86	DHODH	DDAH1	CISD2
GEMIN5	C20orf20	DHRS11	DDR2	CLCN7
GFPT2	C21orf56	DHRS7B	DDX58	CLIP4
GGA1	C21orf59	DHRS9	DDX59	CLK4
GHDC	C21orf91	DIO3OS	DES	CLN3
GLB1	C2orf42	DIXDC1	DHX34	CLPB
GLTSCR2	C2orf69	DLAT	DIAPH1	CMBL
GLUL	C2orf74	DMGDH	DIAPH3	CMC1
GMDS	C2orf88	DMKN	DIEXF	CMIP
GMPR2	C3orf14	DNAJB9	DIP2B	CNIH4
GNG2	C3orf17	DOCK11	DIRAS1	CNNM3
GNL1	C3orf18	DPYSL4	DKK3	CNP
GON4L	C3orf19	DTNB	DLGAP5	CNPPD1
GPATCH8	C3orf64	DTWD2	DNAJC15	COA5
GPD1L	C4orf29	DTX1	DNAJC9	COASY
GPHN	C4orf3	DTX4	DNASE1L1	COL15A1
GPNMB	C4orf43	DUSP4	DNM1	COL27A1
GPR137	C5orf24	DUSP6	DOCK1	COMMD9
GPR137B	C5orf28	DUSP8	DOCK10	COPS7A
GPSM2	C5orf42	DVL2	DOK4	COQ2
GRB14	C5orf43	EBP	DOK5	COQ3
GREB1L	C5orf44	ECH1	DOM3Z	COQ7
GSN	C5orf51	ECHDC1	DPP4	COQ9
GSR	C6orf1	ECHDC2	DPYSL2	CORO7
GUCY1B3	C6orf115	ECHDC3	DPYSL3	COX18
H19	C6orf120	ECHS1	DRAM1	COX19
HAGHL	C6orf225	EFCAB6	DSCC1	COX4I1
HAND2	C6orf62	EFNA1	DSN1	COX5A
HAUS4	C7orf42	EGFLAM	DSP	COX5B
HAUS7	C7orf60	EHD1	DST	COX6A1
HEBP1	C7orf73	EHHADH	DTD1	COX6B1
HEXDC	C8orf31	EIF1B	DUSP18	COX6C
HIF3A	C8orf48	EIF4E3	DUSP5	COX7A2
HIPK2	C8orf83	EIF4EBP2	DUT	COX7B
HLX	C9orf142	EIF4EBP3	DYRK2	COX7C
HMG20A	C9orf150	ELOVL3	DZIP1L	COX8A
HOXA3	C9orf21	ELOVL5	E2F7	CPE
HOXD8	C9orf69	ELOVL6	EBF3	CRADD
HPD	C9orf78	EMP2	ECT2	CRAT
HPGD	C9orf80	EPB41	EDA2R	CREG1
HPS5	C9orf89	EPB41L4B	EDIL3	CRELD2
HSD11B1	CA12	EPB49	EDNRA	CREM
HSD11B1L	CAB39	EPHB2	EEF1G	CRY2
HTRA1	CACNA1C	EPHX1	EEF2K	CRYL1
HTRA3	CACNA2D1	ERO1LB	EFEMP1	CSNK2A2
HUWE1	CAD	ERV3-1	EFEMP2	CSPG4
IDUA	CALHM2	ETFA	EFHC1	CSRNP2
IER3	CALM1	ETFB	EFHD2	CSRP2BP
IFI44L	CALM2	ETFDH	EFNB3	CSTA
IFITM3	CALM3	F11R	EHBP1L1	CSTB
IGFBP4	CALR	FABP3	EHD3	CTAGE5
IGFBP5	CALU	FABP4	EIF5A2	CTDSPL
IGFBP6	CAMK2D	FABP5	ELF2	CTNS
IL11RA	CAND1	FABP7	ELF4	CTPS2
IL15RA	CANT1	FADS1	ELK3	CTSC
IL16	CAPN1	FADS2	ELL2	CTSD
IL17RC	CAPN2	FAM107B	ELTD1	CYB5B
IL1R1	CAPNS1	FAM113B	EMILIN2	CYB5D2
IMPA2	CAPRIN1	FAM117A	EML4	CYB5R1
IMPDH2	CAPZA1	FAM134B	EMP1	CYC1
ING2	CAPZA2	FAM13A	EMX2	CYCS
INHBE	CAPZB	FAM171A2	ENAH	CYGB
INSIG2	CARHSP1	FAM195A	ENG	CYP4V2
IP6K2	CARM1	FAM213A	ENO2	CYP51A1
IPMK	CARS	FAM46C	ENOX1	D2HGDH
IRAK3	CASC3	FAM47E	ENPP2	DALRD3
IRF4	CASC4	FAM49A	EPB41L1	DARS2
ITGA10	CASP2	FAM49B	EPB41L2	DAZAP1
ITGA8	CASP3	FAM89A	EPS8	DBP
ITGB3BP	CBLB	FANCE	EPS8L2	DBT
ITPKB	CBLL1	FAR2	EPSTI1	DCAF12
ITPKC	CBR3	FASN	ERBB2	DCAF8
ITPR1	CBX3	FBXL15	ERBB2IP	DCXR
ITPRIP	CBX5	FBXO10	ERF	DDI2
ITSN1	CBX6	FBXO27	ERP29	DDRGK1
JAGN1	CC2D2A	FBXO6	ESYT2	DDX24
JAK2	CCDC102A	FBXO8	ETS1	DDX28
KCNJ8	CCDC104	FBXW4	ETS2	DDX5
KCNK6	CCDC111	FCGRT	ETV1	DEAF1
KCTD12	CCDC113	FCHO1	ETV5	DEDD
KHDRBS3	CCDC122	FCN1	EVI2A	DENND4A
KIAA0247	CCDC19	FCRLA	EXT1	DENND5B
KIAA0368	CCDC23	FCRLB	EZR	DFFA
KIAA0825	CCDC28B	FDPS	F2R	DGCR6
KIAA1161	CCDC53	FGF1	F3	DGKQ
KIAA1217	CCDC59	FGR	FAIM2	DGKZ
KIAA1467	CCDC76	FHIT	FAM102B	DHFR
KIAA1530	CCDC8	FHL1	FAM108C1	DHRS3
KIAA2018	CCDC90A	FICD	FAM126A	DHTKD1
KIF7	CCDC90B	FIS1	FAM129A	DHX32
KLF9	CCDC91	FITM2	FAM129B	DIRC2
KLHDC5	CCDC97	FLJ35024	FAM176A	DLC1
KLHL26	CCDC99	FLVCR1	FAM177A1	DLD
LAMA2	CCNK	FLVCR2	FAM180A	DLST
LAMB1	CCNL1	FN3K	FAM196B	DMPK
LAMC1	CCNT2	FNDC4	FAM20C	DMWD
LAMP2	CCNY	FXYD1	FAM26E	DNAJB1
LARP1B	CCNYL1	FYB	FAM43A	DNAJB11
LCORL	CCT2	FZD4	FAM63B	DNAJB2
LIFR	CCT3	FZD5	FAM64A	DNAJC25
LIPA	CCT5	FZD9	FANCI	DNAJC25-GNG10
LMO3	CCT6A	G0S2	FAP	DNAJC3
LNP1	CD248	G6PD	FAR1	DNAJC30
LOC100127983	CD276	GAB2	FARP2	DNASE2
LOC100129387	CD2BP2	GADD45G	FAS	DNPEP
LOC100130987	CD47	GAS2L3	FBLIM1	DOHH
LOC100131691	CD55	GATSL3	FBLN5	DOLPP1
LOC100270804	CD58	GBE1	FBN1	DOPEY2
LOC100287015	CD59	GCHFR	FBN2	DPP7
LOC100287177	CDC23	GCLC	FBXL18	DRAM2
LOC100505783	CDC27	GCLM	FBXL7	DUS1L
LOC100505875	CDC37L1	GCOM1	FBXW7	DUS2L
LOC100506385	CDC42	GDF11	FBXW8	DUS4L
LOC100652736	CDC42BPA	GDF15	FCHSD1	DUSP10
LOC338799	CDC42BPB	GFPT1	FCHSD2	DUSP14
LOC389033	CDC42EP2	GHR	FGD4	DUSP23
LOC643401	CDC42SE1	GIPR	FGF5	DUSP3
LOC654433	CDC5L	GK	FGF7	DYNLL1
LOC729680	CDC73	GLDN	FGL2	DYRK1B
LONRF1	CDK12	GLI4	FHL2	DYX1C1
LRFN4	CDK17	GLRX2	FHL3	DYX1C1-CCPG1
LRIG3	CDK2AP1	GPAM	FILIP1L	EARS2
LRRC17	CDK4	GPBAR1	FKBP11	ECD
LRRN3	CDK7	GPD1	FKTN	ECE2
LSAMP	CDKN2A	GPER	FLJ42709	ECI1
LTBP3	CDR2	GPR146	FLNA	ECSIT
MAN1A1	CDR2L	GPR34	FLNB	EDEM2
MAN1A2	CEBPB	GPT	FLNC	EEPD1
MAN2A1	CEBPD	GPT2	FLOT1	EFNA3
MANEA	CENPB	GPX4	FLRT2	EFNA4
MAOA	CENPC1	GRB2	FLYWCH2	EFNB1
MAP1LC3A	CENPP	GRPEL1	FMN2	EGLN2
MAP2K6	CENPT	GYG2	FMNL3	EI24
MAP3K12	CEP120	GYPC	FN1	EIF1AD
MAPK7	CEP164	H2AFJ	FNDC1	EIF1AY
MARCKSL1	CEP170	HACL1	FOS	EIF2AK3
MBD4	CEP250	HADH	FOSB	EIF3A
MDK	CEP350	HADHA	FOSL1	EIF3K
MEGF8	CEP41	HADHB	FOSL2	ELOVL1
MEIS1	CEP57	HAGH	FOXC2	EMR2
MEIS3	CEP78	HCAR2	FOXF2	ENC1
MEPCE	CEP89	HCAR3	FOXL1	ENDOG
METRN	CERCAM	HEPACAM	FOXM1	ENGASE
METTL12	CERS5	HES6	FOXP1	ENOSF1
MFAP1	CETN2	HFE	FOXQ1	EPAS1
MFAP4	CFDP1	HILPDA	FRMD4A	EPB41L5
MFAP5	CFL2	HINT2	FRMD6	EPC1
MFGE8	CHCHD6	HINT3	FRYL	EPDR1
MFI2	CHD1L	HIP1R	FSCN1	EPM2AIP1
MFSD2A	CHD2	HK2	FST	EPS15L1
MGP	CHIC2	HLA-DMA	FTX	ERAL1
MICALL2	CHM	HMGCR	FZD1	ERAP1
MIOS	CHMP2A	HMGCS1	FZD2	ERCC1
MIR17HG	CHMP3	HMGN5	GABPB1	ESRRA
MIR198	CHMP4B	HOOK2	GADD45B	ESYT1
MIR21	CHMP5	HOXA5	GALNT10	EXOC2
MIR222	CHMP6	HOXB4	GALNT5	EXOSC4
MLLT6	CHN1	HOXB6	GALNT7	EXOSC5
MMP2	CHORDC1	HOXB8	GANC	EXOSC6
MMP3	CHPF	HRASLS5	GAS7	EXTL3
MOK	CHPF2	HS2ST1	GATA6	FADS3
MORF4L2	CHRAC1	HSBP1L1	GBP1	FAH
MPG	CHST14	HSD11B2	GBP3	FAHD1
MPPE1	CIR1	HSD17B12	GCC2	FAHD2A
MRC2	CITED2	HSD17B14	GCNT1	FAM100B
MRO	CIZ1	HSD17B8	GDAP1	FAM113A
MRPL51	CKAP2	HSDL2	GGH	FAM115A
MRPS33	CKAP5	HSP90B2P	GLI3	FAM117B
MSX1	CKLF	HSPA12A	GLIPR1	FAM134A
MT1A	CKLF-CMTM1	HSPA5	GLIS2	FAM149A
MT1E	CKS2	HSPB8	GLS	FAM172A
MT1F	CLASP1	HYI	GLT8D1	FAM173A
MT1G	CLDN12	HYOU1	GLT8D2	FAM173B
MT1M	CLEC2B	IDI1	GLTP	FAM174A
MT1X	CLGN	IFI27L1	GNAI2	FAM190B
MT2A	CLIC4	IFI6	GNB4	FAM199X
MUS81	CLINT1	IFRD1	GNPNAT1	FAM200B
MX2	CLIP1	IGF1	GOLIM4	FAM210A
MYO19	CLIP3	IGFBPL1	GPC6	FAM212B
NACAP1	CLPP	IL1B	GPCPD1	FAM214B
NAP1L1	CLSTN1	ILVBL	GPR1	FAM3A
NAPB	CLTC	INPP5K	GPR124	FAM53B
NASP	CLU	INSIG1	GPR176	FAM76A
NAT1	CLUAP1	ISOC1	GPR68	FAM82A2
NAV2	CMAS	ISOC2	GPX1	FASTK
NBPF8	CMTM6	ITGA6	GRAMD3	FASTKD1
NBPF9	CNN3	ITGA7	GREM1	FASTKD5
NCOA7	CNOT2	ITIH1	GREM2	FBXL17
NEBL	CNOT6	ITIH5	GTF2IRD1	FBXO25
NEDD4	CNOT7	KANK1	HABP4	FBXO33
NEFL	CNPY2	KAZN	HAPLN1	FBXO42
NEFM	CNPY3	KCNAB1	HAPLN3	FBXO44
NEK9	CNTLN	KCNB1	HAS1	FBXO9
NFIB	CNTNAP1	KCNE3	HCFC1R1	FDFT1
NFIL3	COBLL1	KCNIP2	HDGFRP3	FDX1L
NFXL1	COBRA1	KCNK12	HECTD2	FEM1A
NID1	COG1	KCNK15	HEG1	FGFRL1
NINJ2	COG3	KCNK3	HEPH	FKBP4
NNMT	COG5	KIAA0408	HERPUD2	FLAD1
NOVA1	COG6	KIAA0664	HES1	FLJ35776
NPDC1	COG7	KIAA1324L	HHIP	FLOT2
NPHP4	COL16A1	KIAA1958	HHIPL1	FNIP2
NPL	COL5A1	KIF21A	HIC1	FNTB
NPR3	COL6A1	KIF22	HIF1A	FOXN3
OGN	COL6A2	KLB	HIP1	FOXP4
OLFML2B	COMMD1	KLF11	HIST1H1A	FOXRED1
OR1J2	COMMD2	KLHDC8B	HIST1H1B	FPGS
OSR1	COMMD4	KLHL25	HIST1H1D	FRMD8
OSR2	COMT	KLHL31	HIST1H2AE	FTH1
P4HA2	COPA	KRT16	HIST1H2AG	FTL
P4HA3	COPB1	KRT79	HIST1H2AH	FUNDC2
P4HTM	COPB2	L2HGDH	HIST1H2AI	FXN
PAPPA2	COPE	LACTB2	HIST1H2AJ	GABARAPL1
PAPSS2	COPG	LAGE3	HIST1H2AK	GABPA
PAQR3	COPS2	LAIR1	HIST1H2AL	GABPB2
PAX3	COPS3	LDHD	HIST1H2AM	GABRE
PC	COPS4	LETM1	HIST1H2BB	GADD45A
PCBP3	COPS6	LFNG	HIST1H2BC	GALE
PCNT	COPS7B	LGALS12	HIST1H2BE	GALM
PCOLCE	COPZ2	LHCGR	HIST1H2BF	GALNT2
PCSK2	CORO1B	LIMS1	HIST1H2BG	GALT
PDE4D	CORO1C	LINC00263	HIST1H2BH	GAMT
PDE7B	CPNE1	LITAF	HIST1H2BI	GAPVD1
PDGFRL	CPNE8	LNPEP	HIST1H2BL	GBA2
PDLIM1	CPPED1	LOC100131490	HIST1H2BM	GBP2
PDPN	CPSF1	LOC100144603	HIST1H2BO	GCC1
PDZRN3	CPSF6	LOC100190938	HIST2H2BF	GCDH
PER1	CPT1C	LOC100292680	HIST2H3A	GCSH
PFKM	CPXM1	LOC100499466	HIST2H3C	GDE1
PGBD1	CREB1	LOC100505666	HIST2H3D	GET4
PHC2	CREB3L2	LOC100505687	HLA-DPA1	GFER
PHF17	CREBBP	LOC283104	HLCS	GFM1
PHF3	CRLF3	LOC283392	HMCN1	GFM2
PHLDB1	CRNKL1	LOC284751	HMGA2	GGCT
PID1	CRYBG3	LOC339524	HMGB1	GHITM
PIGT	CRYZ	LOC651250	HMGB2	GLA
PIGV	CRYZL1	LONP1	HMGN2	GLIPR2
PIK3R1	CSGALNACT2	LPCAT3	HMMR	GLOD4
PISD	CSNK1A1	LPGAT1	HNRPLL	GLRB
PKD1L2	CSNK1D	LPL	HOXC8	GLRX
PKDCC	CSNK1G3	LRIG1	HS3ST3B1	GLRX5
PLAC9	CSNK2A1	LRP5	HS6ST1	GLUD1
PLAG1	CSNK2B	LRRC8B	HSPA13	GNAS
PLCE1	CSTF3	LRRN2	HSPB7	GNB1L
PLCL1	CTCF	LRRN4CL	ICAM1	GNB2L1
PLD3	CTDNEP1	LRTOMT	ICK	GNE
PLEKHA2	CTDP1	LSS	ID1	GNS
PLEKHA5	CTDSP1	LTF	ID2	GOLGA8B
PLEKHF1	CTDSP2	LYNX1	ID3	GOT1
PLEKHG2	CTDSPL2	MAMDC2	ID4	GPC1
PLXDC2	CTH	MAN2C1	IER5L	GPC4
PLXNA2	CTIF	MANF	IFFO1	GPI
PLXND1	CTNNA1	MAP3K1	IFI16	GPR153
PMS2	CTNNB1	MAPK10	IFI27	GPR180
PODN	CTNNBIP1	MAPK11	IFI30	GPRC5B
POLR1B	CTNNBL1	MAPK8IP2	IFI35	GRINA
POLR2H	CTNND1	MAPRE3	IFI44	GRPEL2
POLR3D	CTPS	MAPT	IFITM1	GSTK1
POLR3GL	CTSA	MARC1	IFITM10	GSTP1
PPP1CB	CTSB	MARC2	IFT140	GSTZ1
PRDX6	CTSO	MARCH3	IGFBP3	GTF2I
PRELP	CTSZ	MARCO	IL20RB	GTF3A
PRG4	CTTN	MAST4	IL21R	GTPBP2
PRKAB2	CUEDC2	MATN2	IL32	GTPBP3
PRKAG2	CUL3	MBP	IL6	GTPBP5
PRKCE	CUL4A	MCAM	IL8	GUSBP11
PRKY	CUL5	MCCC1	ILK	GXYLT2
PRMT3	CUTA	MCTP1	INHBA	GYS1
PRODH	CWC22	MDFIC	IQGAP1	H1F0
PROS1	CWC27	ME1	IRX1	H1FX
PRPF6	CWF19L2	ME3	IRX3	HARS2
PRPS2	CXCL12	MECR	IRX5	HAT1
PRR14	CXXC1	MEGF9	ISG15	HAUS2
PRR14L	CXXC5	MESP1	ISLR	HAUS6
PRRG1	CXorf26	MEST	ITGA1	HDHD3
PRRT3	CYB561D1	METTL7B	ITGA11	HEBP2
PSMA4	CYB5R2	MFSD11	ITGA4	HERPUD1
PSMC5	CYB5R3	MFSD3	ITGA5	HIAT1
PTEN	CYB5R4	MFSD9	ITGAV	HIBADH
PTGES	CYBA	MGAT3	ITPR3	HIBCH
PTGFR	CYBRD1	MGC23284	JAM3	HIC2
PTGS1	CYFIP1	MGLL	JAZF1	HIGD2A
PTGS2	CYLD	MGST3	JMJD6	HIRA
PTHLH	CYP20A1	MID1IP1	JRKL	HIST1H1C
PTK2B	DAAM1	MIF4GD	JUNB	HIVEP2
PTPN11	DAAM2	MIR1247	KAZALD1	HLA-A
PTPRD	DAG1	MIR3609	KCNE4	HLA-C
PTPRG	DAGLB	MIR4461	KCNG1	HMBS
PTPRM	DAP	MIR4709	KCNK2	HMGCL
PTPRN	DAPK3	MIR4763	KCNMA1	HMGN3
PYGB	DARS	MIRLET7BHG	KCTD14	HN1L
PYGO1	DAZAP2	MIS12	KCTD3	HNRNPA2B1
RAB10	DBF4	MKNK1	KDELR3	HOMEZ
RAB11FIP2	DBNL	MKNK2	KIAA0101	HOTAIRM1
RAB13	DCAF13	MLXIPL	KIAA0226	HOXA7
RAB33B	DCAF16	MLYCD	KIAA0391	HOXA9
RAB8B	DCAF17	MMAB	KIAA0513	HP1BP3
RAD21	DCAF4	MMD	KIAA0586	HPS6
RAMP2	DCAF6	MME	KIAA0754	HRSP12
RAP2A	DCAKD	MMP15	KIAA1199	HSCB
RAP2C	DCBLD2	MOCS1	KIAA1462	HSD17B10
RARRES2	DCPS	MOGAT1	KIAA1609	HSD17B4
RARRES3	DCTN1	MPP7	KIF18A	HSP90AA1
RASL11A	DCTN3	MPZ	KIF20A	HSP90B1
RASL11B	DDAH2	MRAP	KIF23	HSPA1A
RASSF4	DDOST	MRAS	KIF26B	HSPA1B
RBBP7	DDX18	MRPL38	KIF3C	HSPA2
RBM43	DDX21	MRPL46	KIFC1	HSPA4
RBPMS	DDX23	MRPS11	KITLG	HSPA9
RCC1	DDX27	MRPS15	KLF2	HSPB6
RELL1	DDX39A	MRPS18C	KLF4	HSPD1
REV3L	DDX39B	MRPS27	KLF6	HSPE1
REXO4	DDX46	MRPS5	KLF7	HSPG2
RGMA	DDX50	MSC	KNTC1	HTATSF1P2
RGS17	DEK	MSMO1	KPNA3	HTRA2
RHOU	DENR	MSRA	KRT18	HTT
RILPL2	DEPTOR	MTFP1	KRT19	IARS2
RNASE4	DGKA	MTMR10	KRT7	IBA57
RNASET2	DHRS1	MVD	KRTAP1-5	ICT1
RNF122	DHRS7	MVK	LACC1	IDH1
RNF128	DHX15	MYEF2	LAYN	IDH3A
RNF8	DHX29	MYZAP	LBH	IDH3B
RNPC3	DHX40	NANOS1	LCLAT1	IDH3G
ROBO1	DHX57	NAP1L4	LDB2	IFNGR1
ROCK2	DHX9	NAPRT1	LEPREL1	IFRD2
ROM1	DIAPH2	NAT8L	LGR4	IGF2R
ROR2	DIS3	NAV1	LIG1	IGSF8
RPL11	DLEU2	NCALD	LIG3	IL17RE
RPL21	DLG4	NCAPD3	LIMCH1	IMMP1L
RPL21P28	DLG5	NCOA4	LIMD2	IMMT
RPL27	DLGAP4	NDRG2	LIMK1	IMPAD1
RPL30	DMTF1	NDUFAB1	LIMS2	IMPDH1
RPL35A	DNAJB12	NDUFS1	LMCD1	ING1
RPL36	DNAJB14	NDUFS2	LMNA	INSR
RPLP0	DNAJB4	NFU1	LMNB1	IRF1
RPS12	DNAJB5	NGRN	LMO7	IRF7
RPS27	DNAJC1	NLRC5	LOC100505633	IRS2
RPS6	DNAJC10	NMB	LOC100507551	ISCA1
RPS6KA2	DNAJC17	NNAT	LOC151534	ITGB1BP1
RRNAD1	DNAJC2	NOL3	LOC375295	ITM2B
RSRC1	DNAL1	NOTO	LOX	ITM2C
RUNX1T1	DNLZ	NPC2	LOXL3	ITPR2
RWDD3	DNMBP	NPR1	LPAR1	IVD
RYBP	DNMT1	NPTXR	LPCAT2	IZUMO4
S100P	DNTTIP2	NQO2	LPCAT4	JAG1
S100PBP	DOCK7	NR1D1	LPP	JMJD7
S1PR3	DOK1	NR1H3	LPXN	JMJD7-PLA2G4B
SAMHD1	DONSON	NRCAM	LRP4	JOSD2
SAT2	DPCD	NRN1	LRRC15	JPX
SBSN	DPM1	NSDHL	LRRC16A	JTB
SCARA5	DPM2	NTM	LRRC32	JUND
SCD5	DPP3	NUDT14	LTBP1	KDM2B
SCG5	DPY19L4	NUDT19	LTBP2	KEAP1
SCRG1	DPYD	NUDT7	LTC4S	KHDC1
SDF2	DR1	NUDT8	LUM	KHDC1L
SDHAF1	DRAP1	NXPH4	LXN	KIAA0141
SEMA3A	DROSHA	OAS1	LY6K	KIAA0415
SEMA5A	DSCR3	OASL	LYPD1	KIAA0564
SERBP1	DSE	OBFC2B	MAD1L1	KIAA0922
SERPINA3	DSEL	OBSL1	MAD2L1	KIAA1737
SERPINF2	DSTN	ODF3B	MADD	KIF5B
SERPING1	DTWD1	ODZ4	MAFF	KIFC3
SESN1	DTX3L	OLFM2	MAGED1	KLC1
SETMAR	DUSP1	OPLAH	MAGED2	KLF10
SFRP1	DUSP11	ORMDL3	MAGI1	KLF15
SH3D19	DUSP12	OSBPL11	MALL	KLHL11
SHPK	DVL3	OSGIN1	MALT1	KLHL21
SIPA1	DYNC1H1	OSGIN2	MAP3K6	KLHL23
SIX2	DYNC1I2	P2RY12	MAP3K8	KLHL24
SLC1A1	DYNC2H1	PABPN1	MARCKS	KREMEN1
SLC25A29	DYNC2LI1	PALM	MASP1	KRTCAP2
SLC25A38	DYNLT1	PALM2	MATL2963	LACTB
SLC26A6	DYNLT3	PALMD	MB21D2	LAMA4
SLC35F2	DYRK3	PANK1	MBNL1	LAMB3
SLC43A1	DYRK4	PANK3	MBOAT2	LAP3
SLC44A1	DZIP1	PARP2	MCM2	LARP1
SLC45A1	EBF2	PBRM1	MCM4	LBR
SLCO3A1	EBNA1BP2	PCBD1	MCM5	LDLR
SLFN12	EBPL	PCCB	MCM7	LDLRAD3
SMARCAD1	ECI2	PCK1	MCU	LETMD1
SMARCD2	ECM1	PCSK9	MEIS2	LGALS3BP
SMOX	ECM2	PCYT2	MELK	LHFPL2
SMPDL3A	EDC3	PDE1B	MEOX2	LIAS
SNHG12	EDEM3	PDE3B	MET	LIMD1
SNHG13	EEA1	PDHA1	MGAT1	LIMK2
SNHG3	EEF1A1	PDHB	MGAT4B	LIN7B
SNHG6	EEF1B2	PDHX	MICAL1	LIPT1
SNHG7	EEF1D	PDK1	MICAL2	LMF1
SNORD101	EEF1E1	PDP2	MIDN	LOC100130872
SNORD104	EFHA2	PDSS2	MIR100HG	LOC100131089
SNORD114-20	EHBP1	PDXK	MIR155HG	LOC100216545
SNORD35B	EHD2	PDXP	MIR199A1	LOC100306951
SNORD37	EHD4	PDZD2	MIR199A2	LOC100505738
SNORD60	EID1	PEBP1	MLLT11	LOC100506190
SNORD97	EIF1	PECR	MLPH	LOC100506207
SNUPN	EIF1AX	PELI1	MMP1	LOC100506713
SOBP	EIF2AK2	PEMT	MMP11	LOC100506930
SOD2	EIF2AK4	PEX11A	MN1	LOC100507032
SORBS2	EIF2C1	PEX19	MOV10	LOC100507373
SOX4	EIF2S2	PFKFB1	MOXD1	LOC100507564
SPATA6	EIF3C	PFKFB2	MPHOSPH9	LOC100652758
SPATS2	EIF3CL	PFKFB3	MPP5	LOC147727
SPG20	EIF3D	PGD	MRVI1	LOC152217
SPON2	EIF3G	PGM1	MSN	LOC284440
SPTSSA	EIF3I	PGP	MTHFD1L	LOC284801
SRC	EIF3L	PHB2	MTHFR	LOC285033
SRGN	EIF3M	PHF15	MTMR11	LOC375190
SRPX	EIF4A1	PHLDA3	MUC1	LOC644246
SRPX2	EIF4A3	PIK3CA	MXI1	LOC729013
SRRM2	EIF4E	PIM3	MXRA5	LOC729678
SRSF5	EIF4E2	PIR	MYADM	LOC729852
SSBP2	EIF4EBP1	PKP2	MYBL2	LPIN1
SSH2	EIF4G1	PLA2G12A	MYEOV	LRIF1
SSR1	EIF4G2	PLA2G16	MYH10	LRP3
SSR4	EIF4G3	PLA2G2A	MYH9	LRPPRC
STARD5	EIF5	PLBD1	MYL12A	LRRC58
STIM1	EIF5A	PLCD4	MYLK	LRRC8D
STK19	EIF5B	PLEKHA7	MYO10	LSM10
STON1	EIF6	PLEKHA8P1	MYO18A	LSM4
STS	ELF1	PLEKHG6	MYO1B	LTBR
STXBP4	ELL	PLIN1	MYO1E	LUC7L2
STXBP6	ELOVL4	PLIN2	MYO5A	LUZP1
SULF2	EMD	PLIN4	MYOF	LYPLA1
SUMF2	EMILIN1	PLIN5	NAALADL1	LYPLAL1
SUN2	EML1	PLTP	NAALADL2	LYRM1
SYBU	EMP3	PLXNA4	NACAD	LYRM5
SYF2	EN1	PM20D1	NAV3	LYSMD2
SYNGAP1	ENDOD1	PMEPA1	NBL1	LYSMD4
TANK	ENO1	PMP22	NCAPD2	MACROD1
TAPBPL	ENOPH1	PNPLA2	NCAPG	MAFB
TBC1D1	ENOX2	PNPLA3	NCAPH	MAFG
TBC1D2B	ENPP1	PNPLA7	NCEH1	MALAT1
TBC1D8B	ENSA	PODXL2	NCKAP5L	MAN2A2
TBX15	ENTPD4	POLD2	NDFIP1	MAN2B1
TBX18	ENTPD7	POMC	NDNF	MANBAL
TBX2	EP400	POMGNT1	NDRG1	MAP1LC3B
TCEAL1	EPB41L3	POR	NDRG4	MAP2K3
TCEAL3	EPC2	PPARG	NDST2	MARCH2
TCEAL4	EPG5	PPARGC1A	NDUFA4L2	MARCH5
TCP11L2	EPHB3	PPARGC1B	NDUFC1	MARS2
TENC1	EPRS	PPIF	NEGR1	MBD3
TESK2	EPS15	PPP1R14A	NEK1	MCART1
TFPI	ERC1	PPP1R15B	NEO1	MCART6
TFRC	ERCC2	PPP1R1A	NES	MCAT
TGFB2	ERCC6	PPP1R1B	NET1	MCCC2
TGFBR3	ERGIC2	PPP1R3E	NEXN	MCOLN1
THSD4	ERI1	PPP2R1B	NFASC	MCTS1
TLE2	ERICH1	PPP2R5A	NFATC1	MDH1
TLE3	ERLEC1	PRADC1	NFATC4	MDH2
TMEM100	ERLIN1	PRDX2	NFKBIA	ME2
TMEM132A	ERLIN2	PRDX5	NFKBIZ	MED11
TMEM150C	ERO1L	PRKAR2B	NGF	MED31
TMEM158	ERP44	PRNP	NIN	MED9
TMEM216	ERRFI1	PRR5	NKAP	MESDC1
TMEM241	ESD	PRRT4	NLRP1	METTL7A
TMEM45A	ETAA1	PSAP	NMI	MFSD12
TMEM59L	ETF1	PSKH1	NOS3	MFSD7
TMEM64	ETHE1	PSMA1	NPAS1	MGC21881
TMEM91	ETNK1	PSMA6	NPHP1	MGST1
TMTC3	EVC	PSMD8	NR1D2	MGST2
TMX4	EVI5L	PTER	NR4A1	MIA
TNFAIP8L3	EWSR1	PTGDS	NRG1	MIA3
TNFRSF1B	EXOC3	PTGER3	NRM	MICALL1
TNNT3	EXOC4	PTH1R	NRP1	MIEN1
TNPO1	EXOC5	PTPLB	NT5E	MINOS1
TNRC6A	EXOC6B	PTPN4	NTNG1	MIR143HG
TNS1	EXOC7	PTPRF	NUDT1	MIR4469
TPRA1	EXOG	PYGL	NUDT3	MKKS
TREX2	EXOSC1	PYGM	NUSAP1	MLF2
TRNP1	EXOSC8	QDPR	NXN	MLST8
TSC22D3	EXOSC9	QPCT	NYNRIN	MMACHC
TTC39C	EXT2	QPRT	ODC1	MMP19
TTPAL	EXTL2	RAB20	ODZ3	MOAP1
TXN2	EYA3	RAB3IP	OLFML1	MOCOS
TXNIP	FAM102A	RAC3	OMD	MON1A
UBAC2	FAM103A1	RAD9A	ORAI2	MOSPD2
USP18	FAM108B1	RANGRF	OSBPL10	MPDU1
USP39	FAM111A	RASGRF2	OSBPL3	MPST
USP53	FAM114A1	RASSF3	OSBPL6	MPV17L2
USP54	FAM127A	RASSF5	OSBPL8	MRP63
VIT	FAM127C	RBM24	PABPC1L	MRPL10
WASF3	FAM136A	RBM38	PACSIN2	MRPL12
WDR81	FAM13B	RBP1	PAF1	MRPL14
WIPI1	FAM160B1	RBP4	PAFAH1B3	MRPL16
WISP2	FAM168A	RCOR2	PALLD	MRPL18
WNK4	FAM175B	RDH10	PALM2-AKAP2	MRPL2
WNT5A	FAM176B	RDH5	PAM	MRPL24
XKR8	FAM178A	REEP6	PAMR1	MRPL28
XPNPEP2	FAM188B	RET	PANK2	MRPL30
XRN2	FAM189B	RETSAT	PANX1	MRPL32
YPEL2	FAM193B	RGAG4	PAPPA	MRPL34
YPEL4	FAM206A	RGL3	PBK	MRPL35
ZBED3	FAM208B	RHEB	PBX3	MRPL36
ZBTB16	FAM20B	RHOQ	PCBP4	MRPL41
ZBTB2	FAM21C	RILP	PCDH18	MRPL44
ZBTB33	FAM35A	RMND1	PCDH7	MRPL47
ZCCHC11	FAM36A	RNASEK	PCDHGA12	MRPL49
ZCCHC17	FAM3C	RNF125	PCGF2	MRPL50
ZCCHC7	FAM45A	RNF13	PCNXL2	MRPL53
ZDHHC9	FAM45B	RNF157	PCP4	MRPL54
ZFP36L2	FAM48A	RNF19B	PDCL3	MRPS12
ZFYVE19	FAM50B	RNF5	PDE3A	MRPS14
ZHX3	FAM57A	RPIA	PDE4DIP	MRPS16
ZMYND12	FAM65A	RPP25	PDGFC	MRPS18A
ZNF140	FAM69A	RPRD1A	PDGFD	MRPS18B
ZNF300	FAM96A	RPS25	PDIA5	MRPS2
ZNF33B	FAM98A	RRAGD	PDLIM5	MRPS24
ZNF446	FAM98B	RREB1	PDLIM7	MRPS25
ZNF581	FARP1	RRP9	PDP1	MRPS26
ZNF655	FAT1	RSPO3	PEAK1	MRPS28
ZNF668	FBL	RTKN	PEAR1	MRPS36
ZNF703	FBLN7	RTN3	PELI2	MRPS6
ZNF75D	FBXL12	RTN4RL1	PENK	MRPS7
ZNF771	FBXL3	RXRG	PFKP	MRS2
ZNF775	FBXO7	S100B	PGF	MSRB2
ZNF783	FBXW9	SAP130	PGM2L1	MT1P3
ZNF805	FCF1	SAT1	PHACTR2	MTCH2
ZNF83	FCHO2	SC5DL	PHLDA1	MTERFD3
ZNF85	FEN1	SCAMP3	PHLDB2	MTFMT
ZNFX1-AS1	FER	SCAMP5	PI16	MTG1
	FEZ1	SCARB1	PIP4K2A	MTHFD1
	FEZ2	SCARNA9	PITX2	MTHFD2L
	FGFR1OP2	SCD	PKM2	MTHFS
	FHOD1	SCML1	PKNOX1	MTMR4
	FIBIN	SCRN2	PLAT	MTRNR2L2
	FIBP	SDF2L1	PLAU	MTRNR2L3
	FIG4	SDPR	PLAUR	MTRNR2L4
	FIP1L1	SEC11C	PLCB1	MTRNR2L8
	FKBP10	SELENBP1	PLCB3	MTSS1L
	FKBP14	SEMA3G	PLCD1	MTX3
	FKBP1A	SEMA4G	PLEC	MYCBP
	FKBP3	SEMA6D	PLEKHG4	MYCBP2
	FKBP8	SEPHS2	PLIN3	MYL5
	FKBP9	SEPT5	PLK1	MYLIP
	FLCN	SERPINB6	PLK2	NAA40
	FLII	SERPINI1	PLK3	NAA50
	FLJ10038	SETD7	PLP2	NADK
	FLJ33630	SGCG	PLS3	NADKD1
	FLT3LG	SGK2	PLSCR1	NAMPT
	FMNL2	SH3BGR	PMAIP1	NARF
	FNBP1	SH3PXD2A	PNPLA6	NCK1
	FNBP1L	SHB	PNRC1	NCKIPSD
	FNBP4	SHMT1	PODNL1	NCLN
	FNDC3B	SHMT2	PODXL	NCOR2
	FNIP1	SIAH1	POSTN	NCSTN
	FOXD1	SIK2	PPAPDC1A	NDN
	FOXJ2	SLC12A5	PPARD	NDUFA1
	FOXN2	SLC16A7	PPFIBP1	NDUFA10
	FOXRED2	SLC19A1	PPP1R12A	NDUFA13
	FRA10AC1	SLC19A3	PPP1R15A	NDUFA2
	FRRS1	SLC22A23	PPP1R18	NDUFA3
	FTO	SLC22A3	PPP1R3B	NDUFA4
	FTSJ1	SLC22A5	PPP1R3C	NDUFA6
	FTSJ3	SLC24A2	PPP2R4	NDUFA7
	FUBP1	SLC25A1	PPRC1	NDUFA8
	FUCA2	SLC25A18	PRC1	NDUFA9
	FUNDC1	SLC25A20	PRDM1	NDUFAF1
	FUS	SLC25A22	PRIM2	NDUFAF2
	FUT10	SLC25A33	PRKCDBP	NDUFAF4
	FXR1	SLC25A35	PRKD1	NDUFB1
	FXYD5	SLC25A4	PRKD2	NDUFB11
	FYCO1	SLC25A44	PRKG1	NDUFB2
	FZD6	SLC27A1	PROCR	NDUFB3
	FZR1	SLC27A3	PRPS1	NDUFB4
	G2E3	SLC29A1	PRR11	NDUFB5
	G3BP1	SLC29A2	PRR16	NDUFB6
	G3BP2	SLC29A4	PRR24	NDUFB8
	G6PC3	SLC2A4	PRR7	NDUFB9
	GALK1	SLC2A5	PRRT1	NDUFC2
	GALNS	SLC2A6	PRRX1	NDUFC2-KCTD14
	GALNT11	SLC2A8	PRRX2	NDUFS3
	GAPDH	SLC41A1	PRSS23	NDUFS7
	GAR1	SLC43A2	PRTFDC1	NDUFS8
	GARS	SLC46A3	PSCA	NDUFV1
	GAS2L1	SLC47A1	PSD3	NDUFV2
	GAS6	SLC4A2	PSG5	NDUFV3
	GATAD2A	SLC7A10	PSMB9	NEAT1
	GATAD2B	SLCO4C1	PSMG3	NECAB3
	GBA	SLMO2	PSPH	NEU1
	GCN1L1	SMAD2	PTGER2	NFATC3
	GDI1	SMCR7L	PTGIR	NFIA
	GEM	SNN	PTGIS	NFKBIL1
	GGPS1	SNORA16A	PTK7	NFS1
	GIPC1	SNORA53	PTMA	NHLRC3
	GIT2	SNORA65	PTPLAD2	NICN1
	GJA1	SNORA8	PTPN14	NINJ1
	GJC1	SNORD10	PTTG1	NIT2
	GK5	SNX10	PTX3	NKAPL
	GLB1L	SNX11	PUS7L	NKIRAS1
	GLG1	SNX16	PXN	NME3
	GLIS3	SOD3	PYCR1	NME4
	GLT25D1	SORBS1	RAB23	NMNAT1
	GLYCTK	SORT1	RAB27B	NOP10
	GM2A	SPARCL1	RAB32	NPAS2
	GMFB	SPECC1	RAB33A	NR2F1
	GMPPA	SPIRE2	RAB39B	NR2F6
	GNAI1	SPR	RAB3B	NSFL1C
	GNAI3	SPRY1	RABEP2	NSMAF
	GNB2	SREBF1	RAC2	NT5DC1
	GNG11	STARD4	RACGAP1	NUCKS1
	GNG12	STAT5A	RAI14	NUDT13
	GNG5	STBD1	RALBP1	NUDT16L1
	GNL3	STK32C	RALGPS2	NUDT17
	GNL3L	STK40	RAPH1	NUDT6
	GNPDA2	STON1-GTF2A1L	RARG	NUPR1
	GNPTAB	STRAP	RASA3	OBFC2A
	GOLGA1	STX10	RASA4	OCRL
	GOLGA2	STX11	RASAL2	OGDH
	GOLGA3	SULT1A1	RASSF2	OGFOD2
	GOLGA4	SUPT7L	RBM27	OGFR
	GOLGA5	SURF4	RBMS3	OGFRL1
	GOLGB1	SUZ12P	RC3H2	OGG1
	GOLM1	SV2A	RCAN1	OPA3
	GOLPH3L	SVIL	RCAN3	OPTN
	GOLT1B	SYN2	RCN3	ORMDL1
	GOPC	SYNDIG1	RECK	OS9
	GORAB	SYNGR1	RELL2	OSBP
	GORASP2	SYNGR2	RFC3	OSBPL1A
	GOT2	SYNM	RFX2	OSCP1
	GPATCH2	SYNPO	RGL2	OSTM1
	GPBP1	SYPL2	RGS10	OXA1L
	GPBP1L1	SYT17	RGS4	OXNAD1
	GPKOW	TAB1	RHOC	OXSM
	GPR75-ASB3	TALDO1	RHOJ	PAN2
	GPR89A	TAX1BP1	RIC8A	PANK4
	GPR89B	TBC1D10B	RIN1	PARP10
	GPSM1	TECR	RIN2	PARP3
	GPX7	TF	RIN3	PCBD2
	GPX8	TGM2	RMI1	PCCA
	GRB10	THAP3	RNASEH2A	PCDHGA4
	GRN	THAP8	RND3	PCGF1
	GSS	THNSL1	RNF115	PCK2
	GSTM4	THRSP	RNF138	PCMTD1
	GSTM5	THTPA	RNF144A	PCNX
	GSTO1	TIMMDC1	RNF145	PCOLCE2
	GTF2A1	TIMP4	ROBO3	PCSK5
	GTF2A2	TJP2	ROCK1	PCTP
	GTF2F1	TKT	RORA	PCYOX1
	GTF2H1	TLCD2	RP9P	PDCD4
	GTF2H3	TLR4	RPGRIP1L	PDCD7
	GTF3C6	TM7SF2	RPS6KA3	PDE8A
	GUK1	TMC6	RRM2	PDF
	H2AFV	TMEM11	RSPH3	PDK2
	H2AFX	TMEM132C	RWDD1	PDK3
	H2AFY2	TMEM135	S100A4	PDK4
	H2AFZ	TMEM140	S100A6	PDRG1
	H3F3A	TMEM164	S1PR1	PDSS1
	H3F3AP4	TMEM170B	SAAL1	PEG10
	H3F3B	TMEM201	SACS	PEPD
	H6PD	TMEM205	SAMD9	PER3
	HARS	TMEM220	SAMD9L	PET112
	HAS2	TMEM37	SARM1	PEX10
	HAUS1	TMEM41B	SASH1	PEX11G
	HAVCR2	TMEM53	SCARA3	PEX12
	HAX1	TMEM56	SCHIP1	PEX3
	HBS1L	TMEM97	SCN9A	PEX6
	HCFC1	TNFRSF21	SCUBE3	PEX7
	HDAC1	TNFSF13	SDC1	PFAS
	HDAC10	TP53I3	SEC14L1	PFDN2
	HDAC5	TP53INP2	SEC14L2	PGAM5
	HDAC7	TRAF3IP2	SEC24D	PGPEP1
	HDGF	TRHDE	SECTM1	PGRMC1
	HDGFRP2	TRIB3	SEL1L3	PGRMC2
	HDLBP	TRIM16L	SEMA3B	PGS1
	HEATR1	TRIM39	SEMA3D	PHB
	HEATR6	TRIM69	SEMA7A	PHF1
	HECA	TSGA10	SENP7	PHF13
	HECTD1	TSHR	SEPT6	PHF23
	HERC3	TSLP	SEPW1	PHF7
	HERC4	TSPAN13	SERPINB7	PHOSPHO2
	HEXB	TSPAN15	SERPINE1	PHPT1
	HEXIM1	TSPAN3	SERPINE2	PHTF1
	HGS	TSPAN6	SETD5	PHYH
	HIATL1	TST	SETD8	PHYHD1
	HIPK1	TUB	SFR1	PI4KB
	HIST1H2AB	TUBB2A	SFRP2	PIEZO1
	HIST1H2AC	TUSC5	SFRP4	PIGO
	HIST1H2BK	TUT1	SGCD	PIGP
	HIST1H2BN	TXLNG	SGK1	PIGU
	HIST1H3A	TXNDC11	SGMS1	PIGY
	HIST1H3B	TXNDC12	SGTB	PIGZ
	HIST1H3C	TYRO3	SH2B3	PIK3R3
	HIST1H3D	TYSND1	SH2D4A	PILRB
	HIST1H3E	UAP1L1	SH3BGRL3	PIM1
	HIST1H3F	UBASH3B	SH3BP1	PINK1
	HIST1H3G	UBQLN1	SH3BP4	PITPNC1
	HIST1H3H	UCP1	SH3KBP1	PKIA
	HIST1H3I	UCP2	SH3RF1	PLA2G4A
	HIST1H3J	UHRF1BP1	SHCBP1	PLA2G4B
	HIST1H4A	UNKL	SHISA5	PLA2R1
	HIST1H4B	UPP1	SHKBP1	PLEKHH3
	HIST1H4C	UQCC	SHROOM3	PLEKHO2
	HIST1H4D	UQCRFS1	SIPA1L1	PLSCR3
	HIST1H4E	USP24	SIRPA	PMPCA
	HIST1H4F	USP30	SKIL	PMVK
	HIST1H4H	VILL	SLC12A2	PNKP
	HIST1H4I	VKORC1L1	SLC14A1	PNMA1
	HIST1H4J	VLDLR	SLC16A3	PNP
	HIST1H4K	VPS13D	SLC16A5	PNPLA4
	HIST1H4L	VSIG10	SLC1A4	PNPO
	HIST2H2AA3	VTI1B	SLC25A37	POLR2E
	HIST2H2AA4	WBP2	SLC2A3	POLR2G
	HIST2H2AB	WDSUB1	SLC30A1	POLR3E
	HIST2H4A	WFS1	SLC31A2	POLR3K
	HIST2H4B	XPNPEP1	SLC35E4	POLRMT
	HIST4H4	XRCC6BP1	SLC38A1	POMT2
	HK1	ZBTB7B	SLC38A2	POP5
	HLA-B	ZFAND6	SLC38A4	PPA1
	HLA-E	ZFP106	SLC39A10	PPAN
	HMGA1	ZNF117	SLC39A14	PPAN-P2RY11
	HMGN1	ZNF354A	SLC43A3	PPIL1
	HMGN4	ZNF385A	SLC6A6	PPM1B
	HMOX1	ZNF517	SLC6A9	PPP1CC
	HN1	ZNF589	SLC7A1	PPP1R12C
	HNMT	ZNF672	SLC7A11	PPP6C
	HNRNPA1	ZNF77	SLC7A5	PPPDE2
	HNRNPD	ZNF781	SLC7A8	PPTC7
	HNRNPF	ZNF814	SLC9A7	PQLC1
	HNRNPH1		SLFN11	PQLC2
	HNRNPH3		SMAGP	PREB
	HNRNPK		SMC2	PREPL
	HNRNPL		SMG6	PRKAB1
	HNRNPM		SMTN	PRKACA
	HNRNPR		SMURF2	PRKAR2A
	HNRNPU		SNAI1	PRKCD
	HNRNPUL1		SNAPC4	PRKRIP1
	HNRNPUL2		SNED1	PRMT7
	HNRPDL		SNORD1C	PROSC
	HOMER3		SNRPA	PRPF38B
	HOXB2		SNRPA1	PRPSAP1
	HOXC10		SNX24	PRUNE2
	HOXC4		SOCS1	PSMA3
	HOXC5		SOCS2	PSMA7
	HOXC6		SOCS3	PSMB5
	HOXC9		SOCS5	PSMB6
	HPRT1		SOCS6	PSMD11
	HPS3		SORBS3	PSMD3
	HS3ST3A1		SORCS2	PTCD1
	HSBP1		SPA17	PTDSS2
	HSD17B11		SPC24	PTGES2
	HSD3B7		SPEG	PTGR1
	HSP90AB1		SPHK1	PTOV1
	HSPA8		SPIN4	PTPLA
	HSPB1		SPOCD1	PTPMT1
	HSPB11		SPRED1	PTPRK
	HSPB2		SPRED2	PUS1
	HSPBP1		SPRY4	PWP2
	HSPH1		SPTLC2	PXMP2
	HTATIP2		SPTY2D1	PXMP4
	HYLS1		SQRDL	PYCR2
	IAH1		SRGAP1	QKI
	IARS		SSBP3	RAB3D
	IBTK		SSC5D	RAB43
	IDS		SSX2IP	RAB4B
	IER5		ST3GAL1	RAB7A
	IFI27L2		ST3GAL2	RAB7L1
	IFIT1		ST5	RALGAPA2
	IFIT5		STAG1	RAVER2
	IFITM2		STAMBPL1	RBM14-RBM4
	IFT122		STARD10	RCCD1
	IFT20		STC2	RCL1
	IFT43		STEAP3	RDH11
	IFT46		STK17A	RDH13
	IFT57		STK17B	REEP5
	IFT80		STMN1	RELB
	IFT81		STMN2	REPIN1
	IGF1R		STMN3	RERE
	IGFBP7		STRN	REV1
	IKBIP		STX2	RFTN2
	IKBKE		STXBP5	RFX5
	IKBKG		SULF1	RG9MTD2
	IL13RA1		SUPT5H	RGMB
	IL17RA		SUSD1	RGS3
	IL4I1		SUSD2	RHBDD2
	IL6ST		SUSD3	RHOBTB2
	ILF3		SWAP70	RHOBTB3
	IMPA1		SYNC	RHOT1
	IMPACT		SYNE1	RMRP
	INCENP		SYNJ2	RNF10
	INF2		SYNPO2	RNF126
	INO80		SYT11	RNF167
	INO80E		TACC1	RNF7
	INPP5A		TACC3	RNFT1
	INPP5B		TAF9	RNMTL1
	INTS3		TAGLN	RNPEPL1
	INTS6		TBC1D17	RNU11
	INTS7		TBC1D19	RNU12
	INTS8		TBC1D2	RPA3
	INTS9		TBXA2R	RPAIN
	IPO7		TCEA3	RPL23AP82
	IQCB1		TCEAL7	RPL29
	IQSEC2		TCF12	RPL9
	IRAK4		TCF19	RPLP2
	IRF2BPL		TCF4	RPP14
	IRF3		TCF7	RPP21
	IRF9		TCP11L1	RPPH1
	IRS1		TCTN2	RPS19BP1
	IRX2		TEAD4	RPTOR
	ISG20L2		TES	RQCD1
	ITFG2		TFPI2	RRAGC
	ITGB1		TFPT	RRM2B
	ITGB5		TGFB1	RRP8
	ITGBL1		TGFB1I1	RTN4IP1
	IWS1		TGFBI	RUSC2
	JARID2		TGIF1	RXRA
	JDP2		THBD	S100A13
	JKAMP		THBS1	SAC3D1
	JMY		THBS2	SAMD8
	JOSD1		THBS3	SAMM50
	JUN		TIAM1	SAR1A
	KANK2		TIMP3	SASS6
	KANSL3		TIPARP	SCAI
	KATNA1		TJP1	SCAND1
	KBTBD6		TK1	SCAP
	KCMF1		TM4SF1	SCARB2
	KCNAB2		TMEM106A	SCARNA10
	KCNQ1OT1		TMEM119	SCARNA17
	KCTD10		TMEM155	SCARNA2
	KCTD11		TMEM173	SCARNA7
	KCTD17		TMEM2	SCCPDH
	KCTD7		TMEM200A	SCO1
	KDELC1		TMEM204	SCO2
	KDELC2		TMEM237	SCP2
	KDELR1		TMEM25	SDC2
	KDELR2		TMEM44	SDC3
	KDM1A		TMEM65	SDHA
	KDM3A		TMEM87B	SDHB
	KDM4C		TMEM8B	SDHC
	KDM5B		TMOD3	SDHD
	KDSR		TMPO	SDR39U1
	KHDRBS1		TMSB4X	SEC31B
	KIAA0020		TMSL3	SEL1L
	KIAA0090		TNC	SELO
	KIAA0146		TNFAIP2	SENP3
	KIAA0196		TNFAIP3	SERGEF
	KIAA0355		TNFAIP6	SERINC1
	KIAA0556		TNFRSF12A	SERINC2
	KIAA0930		TNFRSF19	SERP1
	KIAA0947		TNXB	SERPINF1
	KIAA1033		TOP2A	SERTAD3
	KIAA1109		TOR1AIP1	SESN2
	KIAA1429		TP53I13	SESN3
	KIAA1430		TPM1	SESTD1
	KIAA1468		TPM2	SF3B5
	KIAA1731		TPM3	SFT2D1
	KIAA1841		TPM4	SFT2D3
	KIAA1967		TPX2	SFXN4
	KIDINS220		TRAF5	SFXN5
	KIF13A		TRAK1	SGPL1
	KIF1C		TRANK1	SGSM3
	KIF2A		TRIB1	SH3BP5
	KIF3A		TRIB2	SH3GLB1
	KIF3B		TRIM21	SIL1
	KIFAP3		TRIM47	SIM1
	KIN		TRIM59	SIRT2
	KLF13		TRIO	SIRT3
	KLF16		TRIP10	SLC19A2
	KLF3		TRIP13	SLC1A3
	KLHL28		TRO	SLC20A2
	KLHL5		TROAP	SLC25A10
	KLHL9		TRPM4	SLC25A11
	KPNA2		TRPM7	SLC25A13
	KPNA4		TRPV2	SLC25A19
	KPNB1		TSC22D2	SLC25A25
	KRAS		TSHZ1	SLC25A26
	KRBOX1		TSPAN10	SLC25A39
	KRCC1		TSPAN11	SLC25A42
	KRR1		TSPAN4	SLC25A5
	KTI12		TSPAN5	SLC25A6
	KTN1		TSPYL2	SLC27A4
	KXD1		TSTA3	SLC27A5
	L3MBTL3		TTC26	SLC2A11
	LAMB2		TTC39B	SLC2A4RG
	LAMP1		TTC9C	SLC31A1
	LANCL2		TTLL3	SLC33A1
	LAPTM4A		TTLL5	SLC35A4
	LAPTM4B		TTYH3	SLC35G1
	LARP6		TUBA1A	SLC39A3
	LARP7		TUBA1B	SLC39A9
	LAS1L		TUBA1C	SLC3A2
	LASP1		TUBB3	SLC48A1
	LATS1		TUBG2	SLC50A1
	LATS2		TYMS	SLC5A3
	LCOR		UACA	SLC5A6
	LDB1		UBE2C	SLC6A15
	LDHA		UBE4B	SLC6A8
	LDOC1		UBL3	SLC7A6
	LDOC1L		UGGT2	SLTM
	LEMD2		UHRF2	SMAD6
	LENG8		ULBP2	SMARCD1
	LEO1		ULBP3	SMARCD3
	LEPRE1		UNC5B	SMOC1
	LEPREL2		USP1	SMURF1
	LEPREL4		USP34	SNCG
	LGALS1		UST	SNHG9
	LGALS3		VASN	SNORA21
	LGMN		VASP	SNTA1
	LHFP		VCAM1	SNTB1
	LIMA1		VCAN	SNX15
	LIN7A		VCL	SNX21
	LIN7C		VDAC1	SOD1
	LIX1L		VDR	SOS2
	LLGL1		VEPH1	SOWAHC
	LMAN1		VIM	SOX9
	LMBR1L		VPS37C	SP1
	LMBRD1		WARS	SP2
	LMF2		WDFY2	SPATA5
	LMNB2		WDR1	SPG7
	LMO4		WDR54	SPHK2
	LMOD1		WISP1	SPON1
	LOC100132891		WNT5B	SPRYD4
	LOC100287765		XIAP	SPSB1
	LOC100288911		XPOT	SPTBN1
	LOC100506710		YDJC	SQLE
	LOC100507217		YWHAH	SQSTM1
	LOC339803		ZBTB41	SRD5A3
	LOC550643		ZC3H12A	SRP14P1
	LOC654342		ZC3HAV1	SRXN1
	LOC678655		ZDHHC13	SSFA2
	LOC728392		ZFAND2B	ST3GAL4
	LOXL1		ZFAND5	ST6GALNAC6
	LOXL2		ZFHX3	ST7
	LPCAT1		ZFHX4	STARD7
	LPIN2		ZFP36	STAT3
	LRCH3		ZFP36L1	STAT5B
	LRP1		ZFP90	STEAP1
	LRP10		ZFPM1	STK11
	LRP11		ZFYVE28	STK36
	LRP6		ZMIZ2	STK38L
	LRRC27		ZMYM4	STOM
	LRRC40		ZMYM6	STOML1
	LRRC42		ZNF189	STOML2
	LRRC59		ZNF281	STRN3
	LRRC8A		ZNF385D	STX3
	LRRC8C		ZNF407	STX6
	LRRFIP1		ZNF521	STXBP1
	LRRFIP2		ZNF57	SUCLA2
	LSM1		ZNF618	SUCLG1
	LSM3		ZNF844	SUOX
	LSM7		ZWINT	SUPV3L1
	LSMD1		ZYX	SURF1
	LSP1			SURF2
	LTBP4			SUV420H2
	LTN1			SYAP1
	LUC7L3			SYVN1
	LY6E			TAF6L
	LY96			TAF8
	LYAR			TAPT1
	LYRM2			TBC1D10A
	LYRM4			TBC1D16
	LYSMD3			TBC1D24
	LZTFL1			TBC1D4
	LZTS2			TBC1D7
	MACF1			TBCA
	MAGEF1			TCEB3
	MAGEH1			TCN2
	MAGI2-AS3			TCTA
	MAGOH			TEF
	MAGOHB			TERC
	MAGT1			TERF2IP
	MAML2			TESK1
	MAN1B1			TEX264
	MAN2B2			TFDP2
	MANBA			THAP7
	MAP1A			THRA
	MAP1B			THRB
	MAP1S			THYN1
	MAP2K2			TIMELESS
	MAP3K2			TIMM13
	MAP3K7			TIMM21
	MAP4			TIMM44
	MAP4K3			TIMM50
	MAP4K4			TIMM8A
	MAP4K5			TIMM8B
	MAP7D1			TK2
	MAPK1			TLCD1
	MAPK12			TLE1
	MAPK1IP1L			TLK1
	MAPK3			TLN2
	MAPK6			TLR3
	MAPK8IP3			TM9SF1
	MAPKAP1			TMBIM1
	MAPRE1			TMCO6
	MAPRE2			TMED1
	MARCH7			TMED5
	MARK3			TMED8
	MARS			TMEM104
	MARVELD1			TMEM110
	MAST2			TMEM110-MUSTN1
	MAT2B			TMEM111
	MATR3			TMEM126A
	MAX			TMEM129
	MAZ			TMEM141
	MBD2			TMEM143
	MBD5			TMEM147
	MBIP			TMEM160
	MBNL2			TMEM167A
	MBOAT7			TMEM177
	MCC			TMEM187
	MCFD2			TMEM189
	MCL1			TMEM189-UBE2V1
	MCM6			TMEM192
	MCPH1			TMEM22
	MCRS1			TMEM238
	MDM2			TMEM38B
	MDM4			TMEM41A
	MEA1			TMEM50B
	MED15			TMEM55B
	MED16			TMEM63B
	MED17			TMEM66
	MED20			TMEM93
	MED21			TMEM99
	MED22			TMX2
	MED23			TMX2-CTNND1
	MED24			TNFAIP8
	MED4			TNPO3
	MED8			TNS3
	MEF2A			TOB1
	MEF2B			TOB2
	MEF2BNB			TOLLIP
	MEF2BNB-MEF2B			TOM1L2
	MEF2C			TOMM40
	MEF2D			TOMM40L
	METAP1			TOMM5
	METAP2			TOMM6
	METRNL			TOP1
	METTL15			TOR2A
	METTL6			TP53INP1
	MEX3C			TP53TG1
	MFAP2			TPD52L1
	MFSD5			TPGS1
	MGA			TPST2
	MGC72080			TPT1
	MGEA5			TRAF3
	MIB2			TRAP1
	MICA			TRAPPC3
	MICAL3			TRAPPC6A
	MICU1			TREX1
	MIER1			TRIM24
	MIF			TRIM35
	MINK1			TRMU
	MIR1181			TRPT1
	MIR31HG			TRUB1
	MIR3610			TRUB2
	MIR4442			TSFM
	MIR4523			TSKU
	MIR4785			TSPAN14
	MITD1			TSPO
	MKI67IP			TSPYL1
	MKL1			TSSC1
	MKL2			TTC38
	MKRN1			TTC7B
	MLF1			TTI2
	MLH1			TTLL12
	MLH3			TTLL7
	MLL			TUBB4B
	MLL3			TUBB6
	MLL5			TUBE1
	MLLT1			TUBG1
	MMP14			TUFM
	MNAT1			TUSC1
	MNT			TXNDC16
	MOB1A			TYMP
	MOB1B			UBAP1
	MOB4			UBE2G2
	MORC3			UBE2L3
	MORF4L1			UBIAD1
	MOSPD1			UBOX5
	MOSPD3			UBTD1
	MPHOSPH10			UBXN1
	MPHOSPH6			UBXN11
	MPP3			UBXN2B
	MPRIP			UBXN6
	MR1			UGCG
	MRGPRF			UGP2
	MRPL13			UHMK1
	MRPL17			ULK3
	MRPL3			UNC13B
	MRPL4			UNC50
	MRPL40			UNG
	MSH5			UQCR10
	MSL3P1			UQCR11
	MSRB3			UQCRBP1
	MT1L			UQCRC1
	MTA2			UQCRC2
	MTA3			UQCRH
	MTCH1			UQCRQ
	MTCP1			URB2
	MTDH			UROD
	MTHFD2			UROS
	MTMR2			USE1
	MTMR6			USF2
	MTRR			USMG5
	MTX2			USP22
	MVP			USP25
	MXRA7			USP33
	MXRA8			UVRAG
	MYBBP1A			VAMP2
	MYC			VCP
	MYD88			VEGFB
	MYL12B			VMA21
	MYL6			WBP1
	MYL9			WBSCR16
	MYO1C			WDR13
	MYO1D			WDR19
	MYO9A			WDR25
	MYO9B			WDR5
	MYSM1			WDR55
	MZT1			WDR67
	N4BP2			WDR77
	N4BP2L2			WHAMM
	N6AMT2			WIBG
	NAA38			WLS
	NAA60			WRB
	NAAA			WSB2
	NAB2			WWP1
	NACA			XPNPEP3
	NACC1			XPO1
	NADSYN1			XRRA1
	NAE1			YARS2
	NAGA			YJEFN3
	NAGK			YWHAG
	NAGPA			ZDHHC3
	NAPG			ZDHHC4
	NARS			ZEB2
	NAT10			ZHX1
	NAT14			ZNF154
	NAT6			ZNF219
	NBEAL1			ZNF23
	NBN			ZNF274
	NBPF10			ZNF284
	NBR1			ZNF419
	NCAM1			ZNF429
	NCBP1			ZNF43
	NCKAP1			ZNF430
	NCL			ZNF436
	NCOA2			ZNF440
	NCOA3			ZNF506
	NCS1			ZNF514
	NDE1			ZNF524
	NDEL1			ZNF579
	NDFIP2			ZNF628
	NDRG3			ZNF680
	NDST1			ZNF697
	NDUFA12			ZNF70
	NDUFAF3			ZNF708
	NECAP2			ZNF76
	NEDD1			ZNF773
	NEDD8			ZNF789
	NEDD8-MDP1			ZNF91
	NEK6			ZNHIT1
	NEK7			ZSCAN18
	NELF			ZSCAN2
	NENF			ZSWIM3
	NF1			ZSWIM7
	NFAT5			ZYG11B
	NFE2L1
	NFE2L2
	NFIC
	NFIX
	NFKB1
	NFX1
	NFYB
	NGDN
	NGFRAP1
	NHP2
	NHSL1
	NID2
	NIP7
	NIPA2
	NIPAL3
	NIPBL
	NIPSNAP1
	NIPSNAP3A
	NISCH
	NKTR
	NLN
	NMD3
	NME1
	NME1-NME2
	NME2
	NME7
	NMRAL1
	NNT
	NOA1
	NOL11
	NOL12
	NOL6
	NOL8
	NOL9
	NOLC1
	NOM1
	NONO
	NOP58
	NOTCH2NL
	NOTCH3
	NPC1
	NPEPL1
	NPHP3
	NPM1
	NPM3
	NPRL3
	NPTN
	NQO1
	NR2C2
	NR2F2
	NR3C1
	NRAS
	NRBF2
	NRBP1
	NRBP2
	NRF1
	NRIP1
	NRP2
	NRSN2
	NSD1
	NSRP1
	NT5C3
	NT5DC2
	NTAN1
	NUCB2
	NUDCD1
	NUDT16
	NUDT2
	NUFIP1
	NUFIP2
	NUMA1
	NUMB
	NUP160
	NUP214
	NUP37
	NUP43
	NUP62
	NUP93
	NUTF2
	NVL
	OAF
	OAT
	OCIAD1
	ODF2
	ODF2L
	OGT
	OLA1
	OLFML3
	OPA1
	OPN3
	ORC2
	ORC3
	ORMDL2
	OSBPL5
	OSBPL7
	OSBPL9
	OSMR
	OSTC
	OSTF1
	OTUD5
	OTUD7B
	OXCT1
	OXR1
	P4HA1
	P4HB
	PABPC1
	PABPC4
	PAFAH1B1
	PAFAH1B2
	PAICS
	PAIP1
	PAK1
	PAK2
	PAK4
	PAPD4
	PAPSS1
	PARD3
	PARP4
	PARP9
	PARVA
	PATL1
	PBX1
	PCBP1
	PCBP2
	PCDHGA11
	PCDHGB7
	PCDHGC3
	PCGF5
	PCIF1
	PCM1
	PCMT1
	PCNA
	PCNP
	PCSK7
	PCYOX1L
	PDAP1
	PDCD10
	PDCD11
	PDCL
	PDE1A
	PDGFRA
	PDGFRB
	PDIA3
	PDIA4
	PDIA6
	PDLIM2
	PDLIM4
	PDS5A
	PDZD11
	PEA15
	PEF1
	PELO
	PERP
	PEX2
	PFDN4
	PFN1
	PFN2
	PGAM1
	PGAP2
	PGBD3
	PGCP
	PGK1
	PGM2
	PGM3
	PHAX
	PHC3
	PHF11
	PHF14
	PHF5A
	PHGDH
	PHKB
	PHLDA2
	PHLPP2
	PHTF2
	PI4K2B
	PI4KA
	PIAS2
	PIAS3
	PIBF1
	PICALM
	PICK1
	PIGB
	PIGF
	PIGK
	PIH1D1
	PIK3IP1
	PIP5K1A
	PIP5K1C
	PITPNB
	PITRM1
	PJA2
	PKD2
	PKIG
	PLAGL1
	PLCD3
	PLD2
	PLD6
	PLDN
	PLEKHA1
	PLEKHB2
	PLEKHO1
	PLOD1
	PLOD2
	PLOD3
	PLSCR4
	PLXNA3
	PLXNB2
	PML
	PMM2
	PNISR
	PNN
	PNO1
	POC5
	POFUT2
	POLD4
	POLDIP3
	POLK
	POLR2A
	POLR2L
	POLR3B
	POLR3C
	POP1
	POPDC3
	PORCN
	POT1
	PPAP2A
	PPAP2B
	PPAPDC1B
	PPDPF
	PPHLN1
	PPIB
	PPIC
	PPID
	PPIG
	PPIH
	PPIL2
	PPIL3
	PPIL4
	PPIP5K2
	PPM1A
	PPM1F
	PPP1CA
	PPP1R10
	PPP1R11
	PPP1R14B
	PPP1R2
	PPP1R35
	PPP1R7
	PPP2R3A
	PPP2R3C
	PPP2R5C
	PPP2R5D
	PPP3CA
	PPP4C
	PPP4R1
	PPP5C
	PPP6R1
	PPT1
	PPWD1
	PRAF2
	PRDM2
	PRDM4
	PRDX1
	PRDX4
	PREP
	PRICKLE1
	PRICKLE2
	PRKAA1
	PRKCA
	PRKCI
	PRKDC
	PRMT1
	PRMT2
	PRMT6
	PRPF19
	PRPF3
	PRPF31
	PRPF38A
	PRPF40A
	PRPF4B
	PRR12
	PRR13
	PRR3
	PRRC1
	PRRC2A
	PRRC2C
	PRSS53
	PSAT1
	PSIP1
	PSMB10
	PSMB8
	PSMC1
	PSMC2
	PSMC3
	PSMC6
	PSMD1
	PSMD12
	PSMD13
	PSMD14
	PSME2
	PSMG1
	PSMG2
	PTBP1
	PTBP2
	PTBP3
	PTDSS1
	PTGES3
	PTGFRN
	PTMS
	PTP4A1
	PTPN13
	PTPN18
	PTPN2
	PTPN23
	PTPN9
	PTRF
	PTS
	PTTG1IP
	PUM2
	PURA
	PVR
	PVRL2
	PVRL3
	PVT1
	PWP1
	PXDC1
	PXDN
	PXK
	PYCARD
	PYROXD1
	PYROXD2
	QRICH1
	QSER1
	QSOX1
	QSOX2
	R3HDM4
	RAB11A
	RAB11FIP3
	RAB11FIP5
	RAB1B
	RAB22A
	RAB2A
	RAB31
	RAB34
	RAB35
	RAB3GAP1
	RAB3IL1
	RAB40B
	RAB5A
	RAB5C
	RAB6A
	RAB8A
	RABAC1
	RABEPK
	RABGAP1L
	RABGEF1
	RABGGTB
	RABL3
	RAC1
	RAD1
	RAD23B
	RAD50
	RAI1
	RALA
	RALB
	RALY
	RAN
	RANBP1
	RANBP2
	RANBP3
	RANBP6
	RANGAP1
	RAP1A
	RAP2B
	RAPGEF6
	RARA
	RARS
	RASA1
	RASA2
	RASD1
	RASIP1
	RASSF1
	RASSF8
	RAVER1
	RB1
	RB1CC1
	RBCK1
	RBFOX2
	RBM12
	RBM22
	RBM25
	RBM26
	RBM3
	RBM34
	RBM4
	RBM41
	RBM42
	RBM45
	RBM6
	RBM7
	RBMS1
	RBMS2
	RBMX
	RBMX2
	RBPJ
	RBX1
	RCC2
	RCN1
	RCN2
	RDX
	RECQL
	RELA
	REXO2
	RFC4
	RFTN1
	RFWD2
	RFWD3
	RFXANK
	RGL1
	RGS2
	RHBDD3
	RHBDF1
	RHOA
	RHOB
	RHOT2
	RICTOR
	RIF1
	RINT1
	RIPK2
	RIT1
	RLF
	RNASEH2B
	RNF103-CHMP3
	RNF11
	RNF121
	RNF139
	RNF146
	RNF168
	RNF169
	RNF181
	RNF185
	RNF187
	RNF20
	RNF213
	RNF219
	RNF24
	RNF31
	RNF34
	RNF4
	RNF41
	RNF6
	RNH1
	RNMT
	RNPEP
	ROGDI
	ROR1
	RPAP2
	RPAP3
	RPF1
	RPF2
	RPL10
	RPL10A
	RPL12
	RPL13A
	RPL13AP5
	RPL15
	RPL17
	RPL18
	RPL18A
	RPL19
	RPL22L1
	RPL23A
	RPL26
	RPL26L1
	RPL28
	RPL3
	RPL32
	RPL34
	RPL35
	RPL36A
	RPL39
	RPL4
	RPL41
	RPL5
	RPL6
	RPL7A
	RPL8
	RPN2
	RPRD2
	RPS10
	RPS15
	RPS15A
	RPS16
	RPS18
	RPS19
	RPS2
	RPS21
	RPS23
	RPS24
	RPS26
	RPS27A
	RPS29
	RPS3
	RPS3A
	RPS6KA4
	RPS6KC1
	RPS7
	RPS8
	RPS9
	RPSA
	RRAGA
	RRAS
	RRBP1
	RRM1
	RRP7A
	RSF1
	RSL24D1
	RSPRY1
	RSRC2
	RSU1
	RTEL1
	RTN2
	RTN4
	RUFY2
	RUFY3
	RUNDC1
	RUNX1
	RUNX2
	RUSC1
	RUVBL1
	RUVBL2
	RWDD2A
	RWDD2B
	RWDD4
	RYK
	S100A10
	S100A11
	S100A16
	S1PR2
	SAE1
	SAMD4B
	SAP30
	SAP30BP
	SARNP
	SARS
	SART3
	SAV1
	SAYSD1
	SBDS
	SBNO1
	SBNO2
	SCAF11
	SCAF8
	SCAMP4
	SCARF2
	SCFD1
	SCFD2
	SCLY
	SCNM1
	SCPEP1
	SCRN1
	SDAD1
	SDC4
	SDCCAG8
	SDF4
	SDSL
	SEC13
	SEC16A
	SEC22B
	SEC23A
	SEC23B
	SEC24A
	SEC24C
	SEC31A
	SEC61A1
	SEC61B
	SEC61G
	SEC63
	SEH1L
	SELM
	SEMA3C
	SENP6
	SENP8
	SEPT10
	SEPT11
	SEPT2
	SEPT7
[truncated: 684 more rows]

## Sheet: 2B TF kmeans
Promoter ID	Associated TF	Expression group
chr10:111967345..111967422,+	MXI1	Late down-regulated
chr10:111985713..111985774,+	MXI1	Late transient
chr10:114709999..114710031,+	TCF7L2	Late down-regulated
chr10:114710244..114710257,+	TCF7L2	Late transient
chr10:119302232..119302265,+	EMX2	Late transient
chr10:119302508..119302559,+	EMX2	Late down-regulated
chr10:119302645..119302712,+	EMX2	Early down-regulated
chr10:119303078..119303169,+	EMX2	Early down-regulated
chr10:131762504..131762555,-	EBF3	Early down-regulated
chr10:22292613..22292674,-	DNAJC1	Late down-regulated
chr10:31608127..31608156,+	ZEB1	Late down-regulated
chr10:31610110..31610159,+	ZEB1	Late transient
chr10:35415978..35416050,+	CREM	Late up-regulated
chr10:35416142..35416169,+	CREM	Late up-regulated
chr10:3827371..3827386,-	KLF6	Early down-regulated
chr10:3827389..3827408,-	KLF6	Early down-regulated
chr10:38383255..38383324,+	ZNF37A	Late transient
chr10:43134001..43134026,-	ZNF33B	Late transient
chr10:45495946..45495976,+	ZNF22	Late transient
chr10:45496346..45496409,+	ZNF22	Late down-regulated
chr10:51565239..51565263,+	NCOA4	Late up-regulated
chr10:51572339..51572376,+	NCOA4	Late induced
chr10:51572408..51572454,+	NCOA4	Late induced
chr10:51572463..51572470,+	NCOA4	Late induced
chr10:63661437..63661465,+	ARID5B	Early down-regulated
chr10:63809013..63809041,+	ARID5B	Late down-regulated
chr10:63809106..63809127,+	ARID5B	Late down-regulated
chr10:63809134..63809145,+	ARID5B	Early down-regulated
chr10:63853436..63853442,+	ARID5B	Late down-regulated
chr10:77161133..77161176,-	ZNF503	Early down-regulated
chr10:77161504..77161530,-	ZNF503	Late down-regulated
chr10:77161533..77161546,-	ZNF503	Early down-regulated
chr10:98592009..98592061,+	C10orf12	Late down-regulated
chr10:98592009..98592061,+	LCOR	Late down-regulated
chr11:10879572..10879591,-	ZBED5	Late transient
chr11:10879593..10879620,-	ZBED5	Late down-regulated
chr11:113930291..113930339,+	ZBTB16	Late transient
chr11:113930425..113930471,+	ZBTB16	Late transient
chr11:118307179..118307223,+	MLL	Late down-regulated
chr11:123612319..123612395,-	ZNF202	Late up-regulated
chr11:12695944..12695989,+	TEAD1	Late down-regulated
chr11:12696071..12696086,+	TEAD1	Early down-regulated
chr11:128392085..128392232,-	ETS1	Early down-regulated
chr11:13299319..13299424,+	ARNTL	Late transient
chr11:46299199..46299233,+	CREB3L1	Early down-regulated
chr11:46299539..46299620,+	CREB3L1	Early down-regulated
chr11:47279248..47279264,+	NR1H3	Late up-regulated
chr11:47279504..47279563,+	NR1H3	Late induced
chr11:47279568..47279577,+	NR1H3	Late induced
chr11:57103327..57103372,-	SSRP1	Late down-regulated
chr11:615942..615957,-	IRF7	Late induced
chr11:62368696..62368759,-	MTA2	Late down-regulated
chr11:62369108..62369183,-	MTA2	Late up-regulated
chr11:62369291..62369351,-	MTA2	Late down-regulated
chr11:63684602..63684664,-	RCOR2	Late induced
chr11:64072981..64073005,+	ESRRA	Late induced
chr11:64073006..64073017,+	ESRRA	Late induced
chr11:64073022..64073056,+	ESRRA	Late induced
chr11:65430402..65430431,-	RELA	Late down-regulated
chr11:65667846..65667868,-	FOSL1	Early down-regulated
chr11:65686732..65686756,+	DRAP1	Early down-regulated
chr11:65686802..65686818,+	DRAP1	Early down-regulated
chr11:65686855..65686946,+	DRAP1	Late down-regulated
chr11:65686952..65686975,+	DRAP1	Early down-regulated
chr11:65687158..65687216,+	DRAP1	Early down-regulated
chr11:65687362..65687436,+	DRAP1	Early down-regulated
chr11:695006..695074,-	DEAF1	Late up-regulated
chr11:8102749..8102769,+	TUB	Late induced
chr11:8102846..8102892,+	TUB	Late induced
chr11:9482551..9482580,+	ZNF143	Late down-regulated
chr12:104531945..104531996,-	NFYB	Late down-regulated
chr12:108154891..108154923,-	PRDM4	Late down-regulated
chr12:115121962..115121987,-	TBX3	Late down-regulated
chr12:11802600..11802685,+	ETV6	Late transient
chr12:124873357..124873401,-	NCOR2	Early down-regulated
chr12:124873852..124873881,-	NCOR2	Late up-regulated
chr12:133657477..133657529,+	ZNF140	Late transient
chr12:19592602..19592648,+	AEBP2	Late down-regulated
chr12:26277956..26277980,-	BHLHE41	Late induced
chr12:27485785..27485816,+	ARNTL2	Early down-regulated
chr12:27485823..27485868,+	ARNTL2	Early down-regulated
chr12:2986206..2986258,-	FOXM1	Early down-regulated
chr12:2986275..2986363,-	FOXM1	Early down-regulated
chr12:3068544..3068597,+	TEAD4	Early down-regulated
chr12:48298785..48298828,-	VDR	Early down-regulated
chr12:50478977..50479040,+	SMARCD1	Late up-regulated
chr12:51157744..51157796,+	ATF1	Early down-regulated
chr12:51157837..51157892,+	ATF1	Late down-regulated
chr12:51477368..51477386,-	CSRNP2	Late up-regulated
chr12:52445218..52445237,+	NR4A1	Early down-regulated
chr12:53614115..53614154,-	RARG	Early down-regulated
chr12:53625966..53626012,-	RARG	Early down-regulated
chr12:53774567..53774658,+	SP1	Late induced
chr12:53835508..53835533,+	PRR13	Late down-regulated
chr12:53835508..53835533,+	PCBP2	Late down-regulated
chr12:53845879..53845894,+	PCBP2	Late down-regulated
chr12:53856284..53856299,+	PCBP2	Late transient
chr12:54020107..54020196,-	ATF7	Late down-regulated
chr12:54378923..54378966,+	HOXC10	Late down-regulated
chr12:54379029..54379057,+	HOXC10	Early down-regulated
chr12:54393880..54393962,+	HOXC9	Late down-regulated
chr12:54394309..54394336,+	HOXC9	Late up-regulated
chr12:54402729..54402743,+	HOXC8	Late down-regulated
chr12:54402745..54402788,+	HOXC8	Early down-regulated
chr12:54410639..54410659,+	HOXC4	Late down-regulated
chr12:54410639..54410659,+	HOXC5	Late down-regulated
chr12:54410639..54410659,+	HOXC6	Late down-regulated
chr12:54410664..54410684,+	HOXC4	Late down-regulated
chr12:54410664..54410684,+	HOXC5	Late down-regulated
chr12:54410664..54410684,+	HOXC6	Late down-regulated
chr12:54422217..54422239,+	HOXC6	Late induced
chr12:54422245..54422263,+	HOXC6	Late up-regulated
chr12:54772960..54773015,-	ZNF385A	Late induced
chr12:54779511..54779577,-	ZNF385A	Late induced
chr12:56583243..56583293,-	SMARCC2	Late down-regulated
chr12:57504975..57505019,-	STAT6	Late transient
chr12:57505121..57505179,-	STAT6	Late down-regulated
chr12:57911081..57911085,-	DDIT3	Late induced
chr12:57914286..57914304,-	DDIT3	Late induced
chr12:66218598..66218645,+	HMGA2	Early down-regulated
chr12:66218836..66218888,+	HMGA2	Early down-regulated
chr12:6798410..6798503,-	ZNF384	Late down-regulated
chr12:7079780..7079791,-	PHB2	Late induced
chr12:77459306..77459365,-	E2F7	Early down-regulated
chr12:8185288..8185339,+	FOXJ2	Late down-regulated
chr12:96588143..96588185,+	ELK3	Late down-regulated
chr12:96588219..96588263,+	ELK3	Early down-regulated
chr12:96588279..96588299,+	ELK3	Early down-regulated
chr13:114238997..114239077,+	TFDP1	Late down-regulated
chr13:27998720..27998826,+	GTF3A	Late up-regulated
chr13:27998831..27998851,+	GTF3A	Late up-regulated
chr13:41240717..41240735,-	FOXO1	Late transient
chr13:41240737..41240787,-	FOXO1	Late transient
chr13:41635285..41635356,-	ELF1	Late down-regulated
chr13:45010939..45011033,-	TSC22D1	Late down-regulated
chr13:45151259..45151326,-	TSC22D1	Early down-regulated
chr14:100705335..100705360,+	YY1	Late down-regulated
chr14:21566731..21566836,-	ZNF219	Late induced
chr14:21945335..21945419,+	TOX4	Late down-regulated
chr14:23755297..23755350,-	HOMEZ	Late induced
chr14:24630465..24630531,+	IRF9	Late down-regulated
chr14:24837368..24837401,+	NFATC4	Early down-regulated
chr14:35872453..35872485,-	NFKBIA	Late transient
chr14:35873947..35873965,-	NFKBIA	Late down-regulated
chr14:62162204..62162217,+	HIF1A	Late down-regulated
chr14:62162224..62162254,+	HIF1A	Early down-regulated
chr14:62162258..62162269,+	HIF1A	Early down-regulated
chr14:62162285..62162296,+	HIF1A	Early down-regulated
chr14:62203595..62203676,+	HIF1A	Late down-regulated
chr14:62213827..62213853,+	HIF1A	Early down-regulated
chr14:64970494..64970578,-	ZBTB25	Late down-regulated
chr14:64971461..64971542,+	ZBTB1	Late down-regulated
chr14:65569186..65569243,-	MAX	Late down-regulated
chr14:65569244..65569264,-	MAX	Late down-regulated
chr14:69259772..69259790,-	ZFP36L1	Early down-regulated
chr14:74226747..74226779,-	C14orf43	Late down-regulated
chr14:74253865..74253917,-	C14orf43	Late down-regulated
chr14:75745523..75745537,+	FOS	Late transient
chr14:75894714..75894733,+	JDP2	Late down-regulated
chr14:89628064..89628109,-	FOXN3	Late transient
chr14:89883509..89883587,-	FOXN3	Late transient
chr14:90085458..90085557,-	FOXN3	Late transient
chr15:100106155..100106243,+	MEF2A	Late down-regulated
chr15:31619013..31619095,+	KLF13	Late down-regulated
chr15:31619326..31619390,+	KLF13	Late down-regulated
chr15:31658288..31658338,+	KLF13	Late transient
chr15:35280439..35280503,-	ZNF770	Late down-regulated
chr15:37390482..37390572,-	MEIS2	Early down-regulated
chr15:37390850..37390909,-	MEIS2	Early down-regulated
chr15:37392616..37392638,-	MEIS2	Early down-regulated
chr15:37392724..37392757,-	MEIS2	Early down-regulated
chr15:37393449..37393528,-	MEIS2	Late transient
chr15:41952591..41952672,+	MGA	Late down-regulated
chr15:42743341..42743377,-	ZFP106	Late induced
chr15:42749722..42749739,-	ZFP106	Late induced
chr15:50647274..50647336,-	GABPB1	Late transient
chr15:57025675..57025718,-	ZNF280D	Late down-regulated
chr15:57511589..57511608,+	TCF12	Early down-regulated
chr15:57511609..57511651,+	TCF12	Early down-regulated
chr15:60884706..60884743,-	RORA	Late transient
chr15:66994663..66994680,+	SMAD6	Late up-regulated
chr15:67358163..67358192,+	SMAD3	Late down-regulated
chr15:77713025..77713081,+	HMG20A	Late transient
chr15:83953397..83953425,-	BNC1	Late transient
chr15:85144229..85144273,+	ZSCAN2	Late up-regulated
chr15:90294030..90294044,-	MESP1	Late induced
chr15:90294062..90294079,-	MESP1	Late induced
chr15:90294087..90294115,-	MESP1	Late induced
chr15:96869255..96869291,+	NR2F2	Early down-regulated
chr15:96873892..96873919,+	NR2F2	Late down-regulated
chr15:96873921..96873946,+	NR2F2	Late down-regulated
chr15:96874012..96874042,+	NR2F2	Late down-regulated
chr15:96874145..96874166,+	NR2F2	Early down-regulated
chr15:96874244..96874259,+	NR2F2	Early down-regulated
chr15:96876966..96877017,+	NR2F2	Early down-regulated
chr16:11891048..11891130,-	ZC3H7A	Late down-regulated
chr16:1429627..1429662,-	UNKL	Late induced
chr16:29817617..29817664,+	MAZ	Late transient
chr16:29817789..29817838,+	MAZ	Late down-regulated
chr16:29817841..29817865,+	MAZ	Late down-regulated
chr16:29819403..29819442,+	MAZ	Late down-regulated
chr16:29819446..29819471,+	MAZ	Late down-regulated
chr16:30418910..30418961,+	ZNF771	Late transient
chr16:30583017..30583064,-	ZNF688	Late down-regulated
chr16:31076332..31076388,-	ZNF668	Late transient
chr16:31885093..31885165,+	ZNF267	Late down-regulated
chr16:3333443..3333545,+	ZNF263	Late down-regulated
chr16:3930681..3930721,-	CREBBP	Late down-regulated
chr16:4366053..4366076,+	GLIS2	Early down-regulated
chr16:54320101..54320125,-	IRX3	Late down-regulated
chr16:54320646..54320672,-	IRX3	Early down-regulated
chr16:54320675..54320715,-	IRX3	Early down-regulated
chr16:54964740..54964789,+	IRX5	Early down-regulated
chr16:67063036..67063088,+	CBFB	Early down-regulated
chr16:67596417..67596497,+	CTCF	Late down-regulated
chr16:67867749..67867852,-	CENPT	Late down-regulated
chr16:68119324..68119364,+	NFATC3	Late up-regulated
chr16:68573182..68573228,+	ZFP90	Late down-regulated
chr16:69599861..69599885,+	NFAT5	Late down-regulated
chr16:69599899..69599919,+	NFAT5	Late down-regulated
chr16:71496112..71496160,-	ZNF23	Late transient
chr16:73092898..73092931,-	ZFHX3	Early down-regulated
chr16:73093174..73093209,-	ZFHX3	Late transient
chr16:75182376..75182458,+	ZFP1	Late down-regulated
chr16:86600426..86600441,+	FOXC2	Early down-regulated
chr16:86612320..86612394,+	FOXL1	Early down-regulated
chr16:88519669..88519726,+	ZFPM1	Early down-regulated
chr16:8962202..8962222,-	CARHSP1	Late transient
chr16:8962853..8962878,-	CARHSP1	Late down-regulated
chr16:89939979..89940011,+	TCF25	Late down-regulated
chr17:17723626..17723663,-	SREBF1	Late induced
chr17:17723746..17723766,-	SREBF1	Late induced
chr17:17726892..17726903,-	SREBF1	Late induced
chr17:17726907..17726958,-	SREBF1	Late induced
chr17:17740330..17740349,-	SREBF1	Early down-regulated
chr17:1958388..1958404,+	HIC1	Late down-regulated
chr17:1959369..1959388,+	HIC1	Late transient
chr17:2304333..2304364,-	MNT	Late down-regulated
chr17:30677160..30677200,+	ZNF207	Late down-regulated
chr17:3571863..3571881,-	TAX1BP3	Late down-regulated
chr17:3571887..3571918,-	TAX1BP3	Early down-regulated
chr17:35766967..35767022,+	TADA2A	Late down-regulated
chr17:36861393..36861439,+	MLLT6	Late transient
chr17:38219209..38219230,+	THRA	Late up-regulated
chr17:38256822..38256851,-	NR1D1	Late induced
chr17:38474489..38474548,+	RARA	Late down-regulated
chr17:38498594..38498661,+	RARA	Early down-regulated
chr17:38804061..38804112,-	SMARCE1	Late down-regulated
chr17:40428359..40428462,-	STAT5B	Late up-regulated
chr17:40440359..40440386,+	STAT5A	Late induced
chr17:40440446..40440464,+	STAT5A	Late induced
chr17:40440481..40440550,+	STAT5A	Late induced
chr17:40540377..40540481,-	STAT3	Late up-regulated
chr17:40540484..40540537,-	STAT3	Late induced
chr17:45973586..45973618,+	SP2	Late up-regulated
chr17:46125707..46125746,+	NFE2L1	Late down-regulated
chr17:46126136..46126152,+	NFE2L1	Late down-regulated
chr17:46132044..46132080,+	NFE2L1	Early down-regulated
chr17:46621937..46621966,-	HOXB2	Early down-regulated
chr17:46622070..46622109,-	HOXB2	Late induced
chr17:46622114..46622138,-	HOXB2	Late induced
chr17:46655704..46655718,-	HOXB4	Late up-regulated
chr17:46655730..46655791,-	HOXB4	Late induced
chr17:46675420..46675465,-	HOXB6	Late induced
chr17:46675469..46675481,-	HOXB6	Late induced
chr17:46675558..46675577,-	HOXB6	Late induced
chr17:46682321..46682362,-	HOXB6	Late down-regulated
chr17:46690839..46690884,-	HOXB8	Late induced
chr17:47492236..47492251,-	PHB	Late up-regulated
chr17:47492252..47492265,-	PHB	Late induced
chr17:59477233..59477263,+	TBX2	Late transient
chr17:61919985..61920012,-	SMARCD2	Late transient
chr17:61920023..61920110,-	SMARCD2	Late transient
chr17:61920280..61920343,-	SMARCD2	Late transient
chr17:65821603..65821635,+	BPTF	Late down-regulated
chr17:70117153..70117174,+	SOX9	Late up-regulated
chr17:73780879..73780963,+	UNK	Late down-regulated
chr17:7387524..7387597,-	ZBTB4	Late down-regulated
chr17:7590797..7590815,-	TP53	Late down-regulated
chr17:79885576..79885624,-	MAFG	Late up-regulated
chr18:19749541..19749557,+	GATA6	Early down-regulated
chr18:22932080..22932170,-	ZNF521	Early down-regulated
chr18:32870148..32870223,-	ZSCAN30	Late down-regulated
chr18:32924372..32924430,-	ZNF24	Late down-regulated
chr18:3450161..3450183,+	TGIF1	Early down-regulated
chr18:3450293..3450304,+	TGIF1	Early down-regulated
chr18:45456800..45456886,-	SMAD2	Late induced
chr18:47814032..47814079,-	CXXC1	Late down-regulated
chr18:51750414..51750449,-	MBD2	Late transient
chr18:51750948..51751059,-	MBD2	Late down-regulated
chr18:53068911..53068935,-	TCF4	Early down-regulated
chr18:53255415..53255491,-	TCF4	Early down-regulated
chr18:53257001..53257015,-	TCF4	Early down-regulated
chr18:53257027..53257052,-	TCF4	Late down-regulated
chr18:72265084..72265143,+	ZNF407	Early down-regulated
chr18:72922743..72922761,+	TSHZ1	Early down-regulated
chr18:72922777..72922808,+	TSHZ1	Early down-regulated
chr18:72922811..72922827,+	TSHZ1	Early down-regulated
chr18:77160282..77160343,+	NFATC1	Early down-regulated
chr19:10305581..10305646,-	DNMT1	Late down-regulated
chr19:11071685..11071798,+	SMARCA4	Late down-regulated
chr19:11925071..11925113,+	ZNF440	Late up-regulated
chr19:12175535..12175554,+	ZNF844	Early down-regulated
chr19:12721725..12721758,+	ZNF791	Late down-regulated
chr19:12902289..12902307,+	JUNB	Early down-regulated
chr19:13106214..13106382,+	NFIX	Late down-regulated
chr19:13134457..13134462,+	NFIX	Early down-regulated
chr19:13134772..13134822,+	NFIX	Early down-regulated
chr19:13135386..13135435,+	NFIX	Early down-regulated
chr19:15543484..15543561,-	WIZ	Late down-regulated
chr19:1592714..1592762,-	MBD3	Late up-regulated
chr19:16435625..16435682,+	KLF2	Early down-regulated
chr19:1652575..1652621,-	TCF3	Late down-regulated
chr19:17356436..17356481,-	NR2F6	Late induced
chr19:17356697..17356762,-	NR2F6	Late induced
chr19:18392236..18392248,-	JUND	Early down-regulated
chr19:18392422..18392440,-	JUND	Late up-regulated
chr19:1863568..1863586,-	KLF16	Late down-regulated
chr19:1863591..1863611,-	KLF16	Late down-regulated
chr19:19302931..19302974,-	MEF2BNB-MEF2B	Late up-regulated
chr19:19302931..19302974,-	MEF2BNB	Late up-regulated
chr19:19302931..19302974,-	MEF2B	Late up-regulated
chr19:19303619..19303651,+	RFXANK	Late induced
chr19:19303731..19303783,+	RFXANK	Late down-regulated
chr19:19516561..19516644,+	GATAD2A	Late down-regulated
chr19:19932513..19932569,-	ZNF506	Late up-regulated
chr19:21106049..21106072,+	ZNF85	Late transient
chr19:21203451..21203475,+	ZNF430	Late up-regulated
chr19:21512202..21512225,-	ZNF708	Late induced
chr19:21688387..21688432,+	ZNF429	Late up-regulated
chr19:22018966..22019001,-	ZNF43	Late up-regulated
chr19:23578226..23578285,-	ZNF91	Late up-regulated
chr19:2900917..2900981,+	ZNF57	Early down-regulated
chr19:2944907..2944981,-	ZNF77	Late induced
chr19:3359591..3359667,+	NFIC	Late down-regulated
chr19:33793430..33793447,-	CEBPA	Late induced
chr19:33793619..33793632,-	CEBPA	Late induced
chr19:33864571..33864596,+	CEBPG	Late up-regulated
chr19:33864600..33864732,+	CEBPG	Late up-regulated
chr19:33865009..33865090,+	CEBPG	Late induced
chr19:35759424..35759454,+	USF2	Late down-regulated
chr19:35759824..35759891,+	USF2	Late up-regulated
chr19:36545291..36545314,-	THAP8	Late induced
chr19:36705998..36706021,+	ZNF146	Late down-regulated
chr19:36706024..36706049,+	ZNF146	Late down-regulated
chr19:36706055..36706074,+	ZNF146	Late down-regulated
chr19:37064145..37064216,-	ZNF529	Late down-regulated
chr19:38183138..38183157,-	ZNF781	Late induced
chr19:40562072..40562143,-	ZNF780B	Late down-regulated
chr19:4065485..4065546,-	ZBTB7A	Late up-regulated
chr19:4066803..4066886,-	ZBTB7A	Late down-regulated
chr19:42759266..42759290,-	ERF	Early down-regulated
chr19:44576296..44576343,+	ZNF284	Late up-regulated
chr19:45251943..45252006,+	BCL3	Early down-regulated
chr19:45504688..45504782,+	RELB	Late up-regulated
chr19:45971246..45971265,+	FOSB	Early down-regulated
chr19:46801639..46801699,+	HIF3A	Late transient
chr19:47523058..47523114,+	NPAS1	Early down-regulated
chr19:47615498..47615522,-	ZC3H4	Late down-regulated
chr19:47922750..47922795,-	MEIS3	Late transient
chr19:49140572..49140594,-	DBP	Late induced
chr19:49140609..49140643,-	DBP	Late up-regulated
chr19:50169064..50169121,-	IRF3	Late down-regulated
chr19:50432453..50432468,+	ATF5	Late down-regulated
chr19:52598958..52599026,-	ZNF841	Late down-regulated
chr19:52873166..52873208,+	ZNF880	Late down-regulated
chr19:52901094..52901134,+	ZNF528	Late down-regulated
chr19:53193731..53193767,-	ZNF83	Late transient
chr19:53606636..53606692,-	ZNF160	Late down-regulated
chr19:55987963..55987996,+	ZNF628	Late up-regulated
chr19:56092195..56092248,-	ZNF579	Late up-regulated
chr19:56111680..56111716,+	ZNF524	Late up-regulated
chr19:56154958..56155027,+	ZNF581	Late transient
chr19:57752022..57752108,+	ZNF805	Late transient
chr19:57791328..57791377,+	ZNF460	Late down-regulated
chr19:57999101..57999158,+	ZNF419	Late up-regulated
chr19:58011258..58011317,+	ZNF773	Late up-regulated
chr19:58220517..58220583,-	ZNF154	Late induced
chr19:58331088..58331106,+	ZNF587	Late down-regulated
chr19:58400372..58400411,-	ZNF814	Late induced
chr19:58609577..58609628,-	ZSCAN18	Late up-regulated
chr19:58694421..58694485,+	ZNF274	Late up-regulated
chr19:58987786..58987805,+	ZNF446	Late transient
chr19:6110474..6110551,-	RFX2	Early down-regulated
chr19:6279932..6280000,-	MLLT1	Late down-regulated
chr19:7069690..7069726,+	ZNF557	Late down-regulated
chr19:8579030..8579061,-	ZNF414	Late down-regulated
chr19:9695169..9695188,-	ZNF121	Late down-regulated
chr19:9731872..9731915,-	ZNF561	Late down-regulated
chr1:114302086..114302174,-	PHTF1	Late up-regulated
chr1:119530706..119530736,-	TBX15	Late transient
chr1:120190786..120190915,-	ZNF697	Late up-regulated
chr1:14075903..14075940,+	PRDM2	Late down-regulated
chr1:149871114..149871134,+	BOLA1	Late induced
chr1:149871135..149871169,+	BOLA1	Late up-regulated
chr1:150849047..150849082,-	ARNT	Late down-regulated
chr1:150849174..150849200,-	ARNT	Late transient
chr1:151032860..151032918,+	MLLT11	Late down-regulated
chr1:151043216..151043256,+	GABPB2	Late up-regulated
chr1:151319710..151319774,-	RFX5	Late up-regulated
chr1:153895377..153895465,-	GATAD2B	Late down-regulated
chr1:154975258..154975330,+	ZBTB7B	Late induced
chr1:155532531..155532605,-	ASH1L	Late transient
chr1:155826967..155827018,-	GON4L	Late transient
chr1:156470556..156470643,-	MEF2D	Late down-regulated
chr1:158969752..158969780,+	IFI16	Late down-regulated
chr1:158979686..158979745,+	IFI16	Late down-regulated
chr1:158979792..158979814,+	IFI16	Early down-regulated
chr1:158979851..158979865,+	IFI16	Early down-regulated
chr1:158979872..158979898,+	IFI16	Early down-regulated
chr1:161736102..161736123,+	ATF6	Late down-regulated
chr1:16302565..16302605,-	ZBTB17	Late down-regulated
chr1:164528384..164528409,+	PBX1	Late down-regulated
chr1:164528410..164528428,+	PBX1	Late down-regulated
chr1:164528445..164528459,+	PBX1	Late down-regulated
chr1:164528911..164528940,+	PBX1	Early down-regulated
chr1:165394192..165394207,-	RXRG	Late induced
chr1:165394215..165394226,-	RXRG	Late induced
chr1:168195229..168195294,+	SFT2D2	Late down-regulated
chr1:168195229..168195294,+	TBX19	Late down-regulated
chr1:170632115..170632136,+	PRRX1	Early down-regulated
chr1:170632137..170632172,+	PRRX1	Early down-regulated
chr1:170632250..170632277,+	PRRX1	Early down-regulated
chr1:170632285..170632309,+	PRRX1	Early down-regulated
chr1:170632310..170632321,+	PRRX1	Early down-regulated
chr1:170632325..170632339,+	PRRX1	Early down-regulated
chr1:170632439..170632465,+	PRRX1	Early down-regulated
chr1:170632477..170632506,+	PRRX1	Early down-regulated
chr1:170632647..170632659,+	PRRX1	Early down-regulated
chr1:170632683..170632696,+	PRRX1	Early down-regulated
chr1:170632723..170632739,+	PRRX1	Early down-regulated
chr1:170632762..170632786,+	PRRX1	Early down-regulated
chr1:170632907..170632916,+	PRRX1	Early down-regulated
chr1:170632959..170632987,+	PRRX1	Early down-regulated
chr1:170633058..170633084,+	PRRX1	Early down-regulated
chr1:170633262..170633285,+	PRRX1	Early down-regulated
chr1:170633348..170633399,+	PRRX1	Early down-regulated
chr1:197170394..197170444,-	ZBTB41	Late transient
chr1:200379104..200379128,-	ZNF281	Early down-regulated
chr1:200379129..200379174,-	ZNF281	Late down-regulated
chr1:202777535..202777556,-	KDM5B	Late down-regulated
chr1:212782094..212782109,+	ATF3	Late induced
chr1:221053049..221053075,+	HLX	Late transient
chr1:23694794..23694863,-	ZNF436	Late transient
chr1:23696308..23696339,-	ZNF436	Late induced
chr1:23696348..23696363,-	ZNF436	Late induced
chr1:23696448..23696453,-	ZNF436	Late up-regulated
chr1:23885981..23886002,-	ID3	Early down-regulated
chr1:247095194..247095235,-	AHCTF1	Late transient
chr1:247495140..247495177,-	ZNF496	Late down-regulated
chr1:249132556..249132573,+	ZNF672	Late induced
chr1:35656508..35656584,-	SFPQ	Late up-regulated
chr1:35658736..35658754,-	SFPQ	Late down-regulated
chr1:37940170..37940190,+	ZC3H12A	Early down-regulated
chr1:40627038..40627071,+	RLF	Late down-regulated
chr1:43148059..43148108,+	YBX1	Late down-regulated
chr1:43148792..43148849,+	YBX1	Late down-regulated
chr1:53019059..53019176,-	ZCCHC11	Late transient
chr1:59165724..59165751,-	MYSM1	Late down-regulated
chr1:59249707..59249727,-	JUN	Late transient
chr1:59249732..59249749,-	JUN	Late transient
chr1:61547894..61547968,+	NFIA	Late transient
chr1:61548069..61548102,+	NFIA	Late up-regulated
chr1:61548225..61548299,+	NFIA	Late transient
chr1:61924375..61924380,+	NFIA	Late up-regulated
chr1:6684918..6684936,+	THAP3	Late induced
chr1:67390665..67390698,+	MIER1	Late down-regulated
chr1:67395922..67395976,+	MIER1	Late down-regulated
chr1:78148324..78148365,-	ZZZ3	Late down-regulated
chr1:78149041..78149142,-	ZZZ3	Late down-regulated
chr1:78444738..78444773,-	FUBP1	Late down-regulated
chr1:78444778..78444800,-	FUBP1	Late down-regulated
chr1:8483756..8483809,-	RERE	Late up-regulated
chr1:8483878..8483907,-	RERE	Late up-regulated
chr1:8938709..8938720,-	ENO1	Late down-regulated
chr1:8938736..8938756,-	ENO1	Late down-regulated
chr1:8938766..8938774,-	ENO1	Late down-regulated
chr1:90460661..90460745,+	ZNF326	Late down-regulated
chr1:91487553..91487612,-	ZNF644	Late down-regulated
chr1:93811438..93811548,+	DR1	Late down-regulated
chr20:30193083..30193098,+	ID1	Early down-regulated
chr20:306489..306564,+	SOX12	Late down-regulated
chr20:3388541..3388575,-	C20orf194	Late transient
chr20:39317868..39317884,-	MAFB	Late up-regulated
chr20:39946361..39946379,-	ZHX3	Late transient
chr20:39946400..39946423,-	ZHX3	Late transient
chr20:42295745..42295765,+	MYBL2	Early down-regulated
chr20:46130619..46130664,+	NCOA3	Late down-regulated
chr20:47894569..47894799,-	ZNFX1	Late down-regulated
chr20:48599506..48599526,+	SNAI1	Early down-regulated
chr20:48807351..48807384,+	CEBPB	Late down-regulated
chr20:48807456..48807475,+	CEBPB	Late induced
chr20:48807875..48807982,+	CEBPB	Late down-regulated
chr20:48808114..48808168,+	CEBPB	Late up-regulated
chr20:50808290..50808328,-	ZFP64	Late down-regulated
chr21:27107259..27107299,+	GABPA	Late down-regulated
chr21:27107465..27107557,+	GABPA	Late up-regulated
chr21:30671235..30671253,+	BACH1	Late down-regulated
chr21:36260980..36261011,-	RUNX1	Late down-regulated
chr21:40177845..40177863,+	ETS2	Early down-regulated
chr21:43430440..43430485,-	ZNF295	Late down-regulated
chr21:44394645..44394737,+	PKNOX1	Early down-regulated
chr21:47063625..47063658,+	PCBP3	Late transient
chr22:21356378..21356422,-	THAP7	Late up-regulated
chr22:21771656..21771662,+	HIC2	Late induced
chr22:24093267..24093327,-	ZNF70	Late up-regulated
chr22:24129138..24129201,+	SMARCB1	Late down-regulated
chr22:29196511..29196541,-	XBP1	Late down-regulated
chr22:29196547..29196563,-	XBP1	Late down-regulated
chr22:38597987..38598021,+	MAFF	Late induced
chr22:38598086..38598105,+	MAFF	Early down-regulated
chr22:39916243..39916271,+	ATF4	Late induced
chr22:39916558..39916579,+	ATF4	Late down-regulated
chr22:39916888..39916894,+	ATF4	Late induced
chr22:41697520..41697613,+	ZC3H7B	Late down-regulated
chr22:41777927..41777971,+	TEF	Late up-regulated
chr22:41864662..41864708,-	PHF5A	Late down-regulated
chr22:42229100..42229146,+	SREBF2	Late down-regulated
chr22:42229246..42229270,+	SREBF2	Early down-regulated
chr22:42666624..42666673,-	TCF20	Late down-regulated
chr2:101436564..101436647,+	NPAS2	Late up-regulated
chr2:10183651..10183713,+	KLF11	Late induced
chr2:119604456..119604501,-	EN1	Late down-regulated
chr2:119605214..119605230,-	EN1	Late down-regulated
chr2:145274900..145274934,-	ZEB2	Late down-regulated
chr2:145275162..145275202,-	ZEB2	Late transient
chr2:145277640..145277771,-	ZEB2	Late up-regulated
chr2:145277882..145277967,-	ZEB2	Late induced
chr2:145282041..145282092,-	ZEB2	Late induced
chr2:148778652..148778672,+	MBD5	Late down-regulated
chr2:169312725..169312810,+	CERS6	Late transient
chr2:174828545..174828644,-	SP3	Late down-regulated
chr2:174828892..174828972,-	SP3	Late down-regulated
chr2:174830564..174830605,-	SP3	Late down-regulated
chr2:176994408..176994492,+	HOXD8	Late transient
chr2:178128149..178128198,-	NFE2L2	Late transient
chr2:178129414..178129517,-	NFE2L2	Late down-regulated
chr2:191878874..191878938,-	STAT1	Late down-regulated
chr2:19558373..19558392,-	OSR1	Late transient
chr2:208030647..208030689,-	KLF7	Early down-regulated
chr2:208394658..208394692,+	CREB1	Late down-regulated
chr2:208394817..208394834,+	CREB1	Early down-regulated
chr2:223163706..223163730,-	PAX3	Late transient
chr2:231084659..231084721,-	SP110	Late down-regulated
chr2:231191875..231191918,+	SP140L	Late down-regulated
chr2:231280908..231280945,+	SP100	Late down-regulated
chr2:238536207..238536290,+	LRRFIP1	Late down-regulated
chr2:238600789..238600925,+	LRRFIP1	Early down-regulated
chr2:238600933..238600985,+	LRRFIP1	Early down-regulated
chr2:239148671..239148686,-	HES6	Late induced
chr2:239756739..239756755,+	TWIST2	Late down-regulated
chr2:27357446..27357475,-	PREB	Late induced
chr2:27357479..27357524,-	PREB	Late induced
chr2:28615716..28615733,+	FOSL2	Early down-regulated
chr2:28615774..28615785,+	FOSL2	Early down-regulated
chr2:28616337..28616355,+	FOSL2	Early down-regulated
chr2:28616358..28616380,+	FOSL2	Early down-regulated
chr2:28618532..28618610,+	FOSL2	Late transient
chr2:42795839..42795887,+	MTA3	Late down-regulated
chr2:43453734..43453751,-	ZFP36L2	Late transient
chr2:45236540..45236577,-	SIX2	Late transient
chr2:46524537..46524553,+	EPAS1	Late up-regulated
chr2:48541789..48541874,+	FOXN2	Late down-regulated
chr2:66662249..66662267,+	MEIS1	Late transient
chr2:66662281..66662308,+	MEIS1	Late down-regulated
chr2:70314579..70314590,+	PCBP1	Late down-regulated
chr2:70314849..70314860,+	PCBP1	Late down-regulated
chr2:73429697..73429707,+	NOTO	Late induced
chr2:74374995..74375055,-	BOLA3	Late up-regulated
chr2:85198369..85198483,+	KCMF1	Late up-regulated
chr2:85981008..85981025,+	ATOH8	Early down-regulated
chr2:85981073..85981091,+	ATOH8	Early down-regulated
chr2:8822176..8822196,+	ID2	Early down-regulated
chr2:95831389..95831432,-	ZNF514	Late up-regulated
chr2:97202480..97202499,+	ARID5A	Early down-regulated
chr3:101568349..101568365,+	NFKBIZ	Late down-regulated
chr3:107241792..107241845,+	BBX	Late down-regulated
chr3:113415441..113415500,-	KIAA2018	Late transient
chr3:114343768..114343822,-	ZBTB20	Late down-regulated
chr3:114343826..114343869,-	ZBTB20	Late induced
chr3:12329358..12329393,+	PPARG	Late induced
chr3:12329397..12329433,+	PPARG	Late induced
chr3:12330560..12330579,+	PPARG	Late induced
chr3:12392909..12392921,+	PPARG	Late induced
chr3:12392932..12392962,+	PPARG	Late induced
chr3:12392972..12392983,+	PPARG	Late induced
chr3:12392991..12393030,+	PPARG	Late induced
chr3:12393032..12393047,+	PPARG	Late induced
chr3:126076242..126076257,-	KLF15	Late up-regulated
chr3:126076264..126076305,-	KLF15	Late transient
chr3:129158715..129158766,-	MBD4	Late transient
chr3:129158768..129158819,-	MBD4	Late transient
chr3:141087339..141087387,+	ZBTB38	Late transient
chr3:141087393..141087426,+	ZBTB38	Early down-regulated
chr3:141121164..141121249,+	ZBTB38	Late down-regulated
chr3:141747459..141747475,-	TFDP2	Late up-regulated
chr3:141868293..141868355,-	TFDP2	Late up-regulated
chr3:14989076..14989113,+	NR2C2	Late down-regulated
chr3:150126065..150126097,+	TSC22D2	Late down-regulated
chr3:150126759..150126784,+	TSC22D2	Early down-regulated
chr3:170075436..170075520,+	SKIL	Early down-regulated
chr3:178789566..178789620,-	ZMAT3	Late down-regulated
chr3:183415558..183415649,+	YEATS2	Late down-regulated
chr3:185826855..185826911,-	ETV5	Early down-regulated
chr3:187463179..187463201,-	BCL6	Late transient
chr3:187463248..187463264,-	BCL6	Late transient
chr3:193853927..193853944,+	HES1	Early down-regulated
chr3:21792585..21792625,-	ZNF385D	Early down-regulated
chr3:23986762..23986821,+	NR1D2	Early down-regulated
chr3:23986824..23986848,+	NR1D2	Early down-regulated
chr3:24536253..24536328,-	THRB	Late induced
chr3:33481835..33481905,-	UBP1	Late down-regulated
chr3:37217756..37217844,-	LRRFIP2	Late down-regulated
chr3:40566428..40566480,+	ZNF621	Late down-regulated
chr3:47823298..47823423,-	SMARCC1	Late down-regulated
chr3:48282536..48282586,+	ZNF589	Late transient
chr3:48282587..48282603,+	ZNF589	Late induced
chr3:48282607..48282618,+	ZNF589	Late transient
chr3:5021113..5021180,+	BHLHE40	Early down-regulated
chr3:52001426..52001447,-	PCBP4	Early down-regulated
chr3:52001448..52001478,-	PCBP4	Early down-regulated
chr3:52719546..52719636,-	PBRM1	Late induced
chr3:52719912..52719995,-	PBRM1	Late down-regulated
chr3:71007344..71007348,-	FOXP1	Early down-regulated
chr3:71007770..71007789,-	FOXP1	Early down-regulated
chr3:71114066..71114114,-	FOXP1	Early down-regulated
chr3:71630980..71631110,-	FOXP1	Early down-regulated
chr4:103422499..103422632,+	NFKB1	Late down-regulated
chr4:111558135..111558198,-	PITX2	Early down-regulated
chr4:140005341..140005411,-	ELF2	Late down-regulated
chr4:140098339..140098392,-	ELF2	Late transient
chr4:144434584..144434709,+	SMARCA5	Late down-regulated
chr4:144434814..144434932,+	SMARCA5	Late down-regulated
chr4:146402997..146403020,+	SMAD1	Late down-regulated
chr4:174450089..174450153,-	HAND2	Early down-regulated
chr4:174451350..174451363,-	HAND2	Late transient
chr4:174451370..174451387,-	HAND2	Late transient
chr4:18023350..18023385,-	LCORL	Late transient
chr4:26322419..26322479,+	RBPJ	Late up-regulated
chr4:26322616..26322652,+	RBPJ	Late down-regulated
chr4:38665769..38665801,+	KLF3	Late down-regulated
chr4:38665810..38665827,+	KLF3	Late up-regulated
chr4:38665883..38665922,+	KLF3	Late up-regulated
chr4:4291861..4291913,-	LYAR	Late down-regulated
chr4:47916588..47916607,-	NFXL1	Late transient
chr4:4861385..4861398,+	MSX1	Late transient
chr4:87856129..87856186,+	AFF1	Late down-regulated
chr4:95128748..95128794,+	SMARCAD1	Late down-regulated
chr4:95128999..95129056,+	SMARCAD1	Late transient
chr5:131826457..131826514,-	IRF1	Late up-regulated
chr5:132299290..132299310,-	AFF4	Late down-regulated
chr5:132299313..132299334,-	AFF4	Late down-regulated
chr5:133450365..133450444,+	TCF7	Early down-regulated
chr5:135468516..135468621,+	SMAD5	Late down-regulated
chr5:137801160..137801176,+	EGR1	Early down-regulated
chr5:137804484..137804498,+	EGR1	Early down-regulated
chr5:138609782..138609826,+	MATR3	Late transient
chr5:138629349..138629386,+	MATR3	Late down-regulated
chr5:138629389..138629416,+	MATR3	Late down-regulated
chr5:138629417..138629446,+	MATR3	Late down-regulated
chr5:138629628..138629688,+	MATR3	Late down-regulated
chr5:139487363..139487444,+	PURA	Late down-regulated
chr5:139487608..139487663,+	PURA	Late transient
chr5:142783175..142783297,-	NR3C1	Late down-regulated
chr5:142784003..142784065,-	NR3C1	Late down-regulated
chr5:150080543..150080664,-	RBM22	Late down-regulated
chr5:150284420..150284443,-	ZNF300	Late transient
chr5:158526459..158526481,-	EBF1	Late down-regulated
chr5:158526917..158526932,-	EBF1	Late transient
chr5:16465902..16465917,-	ZNF622	Late down-regulated
chr5:178157651..178157689,-	ZNF354A	Late induced
chr5:2751762..2751784,-	IRX2	Late transient
chr5:321810..321877,+	AHRR	Early down-regulated
chr5:3595934..3595957,+	IRX1	Late transient
chr5:72744445..72744466,-	FOXD1	Late down-regulated
chr5:72744594..72744609,-	FOXD1	Late down-regulated
chr5:76383017..76383068,-	ZBED3	Late transient
chr5:76383070..76383117,-	ZBED3	Late transient
chr5:76383133..76383186,-	ZBED3	Late transient
chr5:88178983..88179012,-	MEF2C	Early down-regulated
chr5:88179017..88179046,-	MEF2C	Early down-regulated
chr5:92918919..92918942,+	NR2F1	Late up-regulated
chr6:100912785..100912822,-	SIM1	Late induced
chr6:106534230..106534254,+	PRDM1	Early down-regulated
chr6:108880956..108881011,+	FOXO3	Late down-regulated
chr6:108882109..108882173,+	FOXO3	Late transient
chr6:108977520..108977534,+	FOXO3	Late transient
chr6:109804412..109804458,-	ZBTB24	Late down-regulated
chr6:126102292..126102329,+	NCOA7	Early down-regulated
chr6:126112074..126112144,+	NCOA7	Late transient
chr6:130339710..130339745,+	L3MBTL3	Late down-regulated
chr6:1312325..1312340,+	FOXQ1	Early down-regulated
chr6:134274354..134274371,+	TBPL1	Late down-regulated
chr6:136610911..136610990,-	BCLAF1	Late down-regulated
chr6:1389789..1389821,+	FOXF2	Early down-regulated
chr6:143266297..143266356,-	HIVEP2	Late up-regulated
chr6:144289132..144289134,-	PLAGL1	Late down-regulated
chr6:144329384..144329405,-	PLAGL1	Late down-regulated
chr6:151712673..151712709,-	ZBTB2	Late transient
chr6:15246261..15246312,+	JARID2	Late down-regulated
chr6:155635583..155635644,-	TFB1M	Late down-regulated
chr6:157098775..157098820,+	ARID1B	Late down-regulated
chr6:19837592..19837621,+	ID4	Early down-regulated
chr6:21593973..21593988,+	SOX4	Late transient
chr6:21597370..21597408,+	SOX4	Late transient
chr6:21597431..21597447,+	SOX4	Late transient
chr6:21597514..21597578,+	SOX4	Late transient
chr6:21597765..21597779,+	SOX4	Late transient
chr6:28109608..28109693,+	ZNF192	Late down-regulated
chr6:28411241..28411284,-	ZSCAN23	Late transient
chr6:31126291..31126399,+	TCF19	Early down-regulated
chr6:31515337..31515420,+	NFKBIL1	Late up-regulated
chr6:32095523..32095564,-	ATF6B	Late transient
chr6:32095968..32096032,-	ATF6B	Late down-regulated
chr6:34204642..34204664,+	HMGA1	Late down-regulated
chr6:34204672..34204692,+	HMGA1	Early down-regulated
chr6:34204921..34204939,+	HMGA1	Early down-regulated
chr6:34204973..34204990,+	HMGA1	Early down-regulated
chr6:35227480..35227546,+	ZNF76	Late up-regulated
chr6:35310395..35310410,+	PPARD	Early down-regulated
chr6:35464817..35464894,-	TEAD3	Late down-regulated
chr6:391743..391759,+	IRF4	Late transient
chr6:41514078..41514158,+	FOXP4	Late induced
chr6:41514305..41514359,+	FOXP4	Late induced
chr6:43139041..43139094,+	SRF	Late transient
chr6:43139153..43139232,+	SRF	Late down-regulated
chr6:44355423..44355470,+	CDC5L	Late down-regulated
chr6:45296048..45296082,+	RUNX2	Late down-regulated
chr6:56954919..56955000,+	ZNF451	Late down-regulated
chr6:7107999..7108031,+	RREB1	Late induced
chr6:7108179..7108199,+	RREB1	Late induced
chr6:85474299..85474324,-	TBX18	Late transient
chr6:87865262..87865311,+	ZNF292	Late down-regulated
chr7:102985160..102985273,-	DNAJC2	Late down-regulated
chr7:104654623..104654669,+	MLL5	Late down-regulated
chr7:111846741..111846776,+	ZNF277	Late down-regulated
chr7:129251531..129251601,+	NRF1	Late down-regulated
chr7:137563945..137564001,-	CREB3L2	Late transient
chr7:137564014..137564042,-	CREB3L2	Late transient
chr7:137564372..137564394,-	CREB3L2	Late transient
chr7:137686791..137686821,-	CREB3L2	Late down-regulated
chr7:137686824..137686865,-	CREB3L2	Early down-regulated
chr7:14029283..14029311,-	ETV1	Early down-regulated
chr7:148892653..148892729,+	ZNF282	Late down-regulated
chr7:148959269..148959326,+	ZNF783	Late transient
chr7:150076406..150076456,+	ZNF775	Late transient
chr7:150946015..150946070,-	SMARCD3	Late up-regulated
chr7:152133059..152133102,-	MLL3	Late down-regulated
chr7:15726243..15726293,-	MEOX2	Early down-regulated
chr7:15726296..15726315,-	MEOX2	Early down-regulated
chr7:17338239..17338262,+	AHR	Early down-regulated
chr7:17338266..17338282,+	AHR	Early down-regulated
chr7:17338324..17338341,+	AHR	Early down-regulated
chr7:19157248..19157268,-	TWIST1	Late down-regulated
chr7:27183263..27183284,-	HOXA5	Late induced
chr7:27192185..27192209,-	HOXA3	Late transient
chr7:27196217..27196246,-	HOXA7	Late induced
chr7:27196267..27196311,-	HOXA7	Late up-regulated
chr7:27205106..27205134,-	HOXA9	Late induced
chr7:27205136..27205164,-	HOXA9	Late up-regulated
chr7:27788205..27788255,+	TAX1BP1	Late induced
chr7:28220354..28220441,-	JAZF1	Early down-regulated
chr7:42276787..42276815,-	GLI3	Early down-regulated
chr7:42276822..42276895,-	GLI3	Early down-regulated
chr7:44143925..44143970,+	AEBP1	Early down-regulated
chr7:44143978..44143989,+	AEBP1	Early down-regulated
chr7:64023441..64023462,-	ZNF680	Late induced
chr7:64467057..64467078,-	ZNF117	Late induced
chr7:73038839..73038862,-	MLXIPL	Late induced
chr7:73038865..73038866,-	MLXIPL	Late induced
chr7:73038867..73038878,-	MLXIPL	Late induced
chr7:74072021..74072119,+	GTF2I	Late up-regulated
chr7:74072135..74072171,+	GTF2I	Late induced
chr7:77428149..77428220,+	PHTF2	Late down-regulated
chr7:86781734..86781777,+	DMTF1	Late down-regulated
chr7:99070499..99070523,+	ZNF789	Late up-regulated
chr7:99156145..99156207,+	ZNF655	Early down-regulated
chr7:99156434..99156510,+	ZNF655	Late transient
chr8:103667935..103667960,-	KLF10	Late up-regulated
chr8:106330656..106330684,+	ZFPM2	Late down-regulated
chr8:124286775..124286860,-	ZHX1	Late induced
chr8:128748308..128748324,+	MYC	Late transient
chr8:128748470..128748487,+	MYC	Late down-regulated
chr8:128750654..128750793,+	MYC	Late down-regulated
chr8:144356704..144356717,+	GLI4	Late induced
chr8:145980808..145980922,-	ZNF251	Late down-regulated
chr8:146024397..146024416,+	ZNF517	Late induced
chr8:146176199..146176272,-	ZNF16	Late down-regulated
chr8:22550982..22550999,-	EGR3	Early down-regulated
chr8:25902876..25902936,-	EBF2	Late down-regulated
chr8:37553261..37553282,+	ZNF703	Late down-regulated
chr8:37553292..37553317,+	ZNF703	Late transient
chr8:37963407..37963454,+	ASH2L	Late induced
chr8:42698194..42698239,-	THAP1	Late transient
chr8:42698433..42698486,-	THAP1	Late down-regulated
chr8:48650697..48650708,-	CEBPD	Late down-regulated
chr8:48650715..48650735,-	CEBPD	Late down-regulated
chr8:49833948..49833973,-	SNAI2	Late transient
chr8:49833978..49833996,-	SNAI2	Late down-regulated
chr8:57123815..57123867,-	PLAG1	Late transient
chr8:71316021..71316068,-	NCOA2	Late down-regulated
chr8:72756063..72756125,-	MSC	Late induced
chr8:72756194..72756208,-	MSC	Late induced
chr8:72756213..72756243,-	MSC	Late induced
chr8:72756267..72756296,-	MSC	Late induced
chr8:72756637..72756664,-	MSC	Late induced
chr8:72756667..72756736,-	MSC	Late induced
chr8:73921085..73921125,+	TERF1	Late down-regulated
chr8:77593474..77593612,+	ZFHX4	Late down-regulated
chr8:93115584..93115642,-	RUNX1T1	Late transient
chr8:99956662..99956684,+	OSR2	Late transient
chr9:104161123..104161205,+	ZNF189	Early down-regulated
chr9:110250697..110250738,-	KLF4	Early down-regulated
chr9:110252035..110252057,-	KLF4	Early down-regulated
chr9:115818951..115819011,-	ZFP37	Late down-regulated
chr9:116638565..116638606,+	ZNF618	Late down-regulated
chr9:117150254..117150271,-	AKNA	Late transient
chr9:125667518..125667588,-	RC3H2	Early down-regulated
chr9:125675576..125675612,-	ZBTB6	Late down-regulated
chr9:128509663..128509715,+	PBX3	Early down-regulated
chr9:130954041..130954121,-	CIZ1	Late down-regulated
chr9:132427883..132427951,+	PRRX2	Early down-regulated
chr9:132427972..132428056,+	PRRX2	Early down-regulated
chr9:137218281..137218340,+	RXRA	Late up-regulated
chr9:139294614..139294633,-	SNAPC4	Late down-regulated
chr9:14083467..14083483,-	NFIB	Late transient
chr9:14314131..14314147,-	NFIB	Late down-regulated
chr9:14314566..14314618,-	NFIB	Late transient
chr9:16870659..16870675,-	BNC2	Early down-regulated
chr9:2015335..2015370,+	SMARCA2	Late down-regulated
chr9:33290491..33290564,+	NFX1	Late down-regulated
chr9:35732561..35732587,+	CREB3	Late down-regulated
chr9:35732592..35732640,+	CREB3	Late down-regulated
chr9:35732647..35732678,+	CREB3	Early down-regulated
chr9:4300050..4300118,-	GLIS3	Late down-regulated
chr9:73028814..73028895,-	KLF9	Late transient
chr9:73029018..73029042,-	KLF9	Late transient
chr9:73029219..73029289,-	KLF9	Late transient
chr9:88969303..88969335,-	ZCCHC6	Late down-regulated
chr9:94186101..94186122,-	NFIL3	Late transient
chr9:94186131..94186174,-	NFIL3	Late transient
chrX:106959661..106959763,-	TSC22D3	Late up-regulated
chrX:106960180..106960197,-	TSC22D3	Late up-regulated
chrX:106960221..106960236,-	TSC22D3	Late transient
chrX:106960249..106960260,-	TSC22D3	Late transient
chrX:106960285..106960299,-	TSC22D3	Late transient
chrX:107018969..107019024,-	TSC22D3	Late transient
chrX:107019163..107019179,-	TSC22D3	Late transient
chrX:119384629..119384720,+	ZBTB33	Late transient
chrX:128657413..128657456,-	SMARCA1	Late down-regulated
chrX:128657457..128657475,-	SMARCA1	Late down-regulated
chrX:129244454..129244488,-	ELF4	Early down-regulated
chrX:129244840..129244881,-	ELF4	Early down-regulated
chrX:134477924..134477988,-	ZNF75D	Late transient
chrX:134478706..134478736,+	ZNF449	Late down-regulated
chrX:70503447..70503517,+	NONO	Late down-regulated
chrX:70503529..70503549,+	NONO	Late transient
chrX:77041685..77041716,-	ATRX	Late down-regulated
