# Supplementary material for: Transcriptional Dynamics During Human Adipogenesis and Its Link to Adipose Morphology and Distribution
Source: Oxford University Press journal article supplement (doi:10.2337/db16-0631), 2016-11-01
Supplement: db160631supplementarydata4.xlsx [file db160631supplementarydata4.xlsx]

## Sheet: group1_transient
Annotation Cluster 1	Enrichment Score: 14.652865291157052
Category	Term	Count	%	PValue	Genes	List Total	Pop Hits	Pop Total	Fold Enrichment	Bonferroni	Benjamini	FDR
GOTERM_CC_FAT	GO:0005576~extracellular region	162	15.9763	1.60789e-20	ASPN, FGF18, RARRES2, LTBP1, IL16, LTBP3, FAM20A, FST, FSTL3, POSTN, FSTL1, MMP3, MMP2, TGFB2, B2M, OGN, APOD, HTRA1, SBSN, TGFBI, IL15RA, HTRA3, CFD, SPON2, GNL1, F10, OLFML2B, CRTAP, MFI2, CST3, LIFR, MGP, MFGE8, SERPING1, TCN2, PRELP, PTHLH, C15ORF61, SERPINF2, NAV2, PDGFRL, COL1A2, TFPI, MFAP1, ADAMTS1, LAMC1, COL1A1, MFAP4, DST, MFAP5, ADAMTS2, ADAMTS5, ADAMTS4, WNT5A, HDLBP, PODN, CLU, ELN,…	685	556	4615	1.963	6.83353e-18	6.83353e-18	2.26247e-17
GOTERM_CC_FAT	GO:0044421~extracellular region part	109	10.7495	2.63662e-18	ASPN, FGF18, LTBP1, IL16, FSTL3, POSTN, FSTL1, MMP3, MMP2, TGFB2, OGN, APOD, HTRA1, TGFBI, IL15RA, SPON2, CFD, GNL1, CRTAP, CST3, MGP, SERPING1, MFGE8, TCN2, PRELP, PTHLH, SERPINF2, NAV2, COL1A2, TFPI, MFAP1, ADAMTS1, COL1A1, LAMC1, MFAP4, ADAMTS2, MFAP5, DST, ADAMTS5, ADAMTS4, WNT5A, HDLBP, PODN, ELN, CLU, TIMP2, VIT, TIMP3, ACE, BCHE, ANGPTL1, LAMB1, SRGN, FN1, SDF2, COL18A1, BMP1, CCDC80, COL1…	685	326	4615	2.25263	1.12056e-15	5.60281e-16	3.71e-15
GOTERM_CC_FAT	GO:0031012~extracellular matrix	64	6.31164	3.40707e-14	ASPN, PODNL1, LTBP1, POSTN, MMP3, MMP2, TGFB2, OGN, CILP2, ANG, GPC6, TGFBI, SPON2, COL11A1, CRTAP, CILP, MGP, PRELP, BGN, NAV2, COL1A2, MFAP1, ADAMTS1, VCAN, LAMC1, COL1A1, MFAP4, MFAP5, ADAMTS2, DST, ADAMTS5, ADAMTS4, WNT5A, FMOD, PODN, CD248, ELN, ADAMTS15, COL3A1, DCN, VIT, TIMP2, TIMP3, CRISPLD2, COL6A3, COL6A2, COL6A1, LAMB1, THBS1, FN1, DPT, COL18A1, FBN1, CCDC80, NID1, SPARC, COL16A1, COL…	685	164	4615	2.62916	1.44856e-11	4.82858e-12	4.79616e-11
GOTERM_CC_FAT	GO:0005578~proteinaceous extracellular matrix	61	6.01578	3.42848e-14	ASPN, PODNL1, LTBP1, POSTN, MMP3, MMP2, OGN, CILP2, ANG, GPC6, TGFBI, SPON2, COL11A1, CRTAP, CILP, MGP, PRELP, BGN, NAV2, COL1A2, MFAP1, ADAMTS1, VCAN, LAMC1, COL1A1, MFAP4, MFAP5, ADAMTS2, DST, ADAMTS5, ADAMTS4, WNT5A, FMOD, PODN, CD248, ADAMTS15, COL3A1, ELN, DCN, VIT, TIMP2, TIMP3, COL6A3, COL6A2, COL6A1, LAMB1, FN1, DPT, COL18A1, FBN1, CCDC80, NID1, SPARC, COL16A1, COL5A2, LAMA2, OMD, FBLN1, …	685	152	4615	2.70376	1.458e-11	3.64497e-12	4.82725e-11
GOTERM_CC_FAT	GO:0005615~extracellular space	63	6.21302	1.09872e-09	FGF18, FGF7, IL16, IGFBP6, FSTL3, PRDX4, FSTL1, MMP3, MMP2, TGFB2, METRN, APOD, ANG, GSN, SMPDL3A, HTRA1, SCRG1, GPC6, TGFBI, IL15RA, ANGPT1, CFD, GNL1, CILP, CST3, MGP, SERPING1, MFGE8, TCN2, PTHLH, CTSK, SERPINF2, COL1A2, TFPI, ADAMTS4, WNT5A, HDLBP, CSF1, CXCL2, COL3A1, CLU, CRLF1, PCSK2, ACE, BCHE, C1QTNF1, COL6A3, ANGPTL1, THBS1, FIGF, SRGN, FN1, SDF2, COL18A1, BMP1, FBN1, FBLN1, APOL1, SULF…	685	197	4615	2.15454	4.66956e-07	9.33913e-08	1.54602e-06
Annotation Cluster 2	Enrichment Score: 3.708273986133293
Category	Term	Count	%	PValue	Genes	List Total	Pop Hits	Pop Total	Fold Enrichment	Bonferroni	Benjamini	FDR
GOTERM_BP_FAT	GO:0001944~vasculature development	39	3.84615	6.62417e-05	FGF18, CAV1, HTATIP2, ACVRL1, NRP1, COL3A1, FOXO1, ANPEP, SRF, PTEN, MMP2, TGFB2, SEMA5A, ACE, HOXA3, ROBO1, ANG, HAND2, PTK2B, RHOB, ANGPT1, PLXND1, THBS1, FIGF, PPAP2B, B4GALT1, COL18A1, PDPN, TGFBR2, ARHGAP24, NCL, THY1, BGN, JUN, COL1A2, ADRA1B, TGFBR3, ATPIF1, COL1A1	729	138	4909	1.90305	0.182129	0.0153464	0.119366
GOTERM_BP_FAT	GO:0001568~blood vessel development	38	3.74753	0.000108795	FGF18, CAV1, HTATIP2, ACVRL1, NRP1, COL3A1, FOXO1, ANPEP, SRF, PTEN, MMP2, TGFB2, SEMA5A, ACE, HOXA3, ROBO1, ANG, HAND2, PTK2B, RHOB, ANGPT1, PLXND1, THBS1, FIGF, PPAP2B, B4GALT1, COL18A1, TGFBR2, ARHGAP24, NCL, THY1, BGN, JUN, COL1A2, ADRA1B, TGFBR3, ATPIF1, COL1A1	729	136	4909	1.88153	0.281228	0.0233105	0.195975
GOTERM_BP_FAT	GO:0001525~angiogenesis	26	2.5641	0.000171076	FGF18, NRP1, ACVRL1, HTATIP2, ANPEP, SRF, PTEN, TGFB2, SEMA5A, HAND2, PTK2B, ANG, ROBO1, RHOB, ANGPT1, PLXND1, THBS1, FIGF, B4GALT1, COL18A1, TGFBR2, ARHGAP24, NCL, THY1, JUN, ATPIF1	729	81	4909	2.16149	0.405039	0.0319328	0.308001
GOTERM_BP_FAT	GO:0048514~blood vessel morphogenesis	31	3.0572	0.00119117	FGF18, CAV1, NRP1, ACVRL1, HTATIP2, ANPEP, SRF, PTEN, TGFB2, SEMA5A, ACE, HOXA3, ROBO1, ANG, HAND2, PTK2B, RHOB, ANGPT1, PLXND1, THBS1, FIGF, B4GALT1, COL18A1, TGFBR2, ARHGAP24, NCL, THY1, BGN, JUN, ADRA1B, ATPIF1	729	116	4909	1.79957	0.973147	0.117271	2.12604
Annotation Cluster 3	Enrichment Score: 3.6961792294226608
Category	Term	Count	%	PValue	Genes	List Total	Pop Hits	Pop Total	Fold Enrichment	Bonferroni	Benjamini	FDR
GOTERM_BP_FAT	GO:0003013~circulatory system process	23	2.26824	0.000153347	CAV1, ACVRL1, ADORA2B, PTGS2, ACTA2, ELN, PTGS1, ATP1A1, SERPING1, NPR3, TPM1, SOD2, EDNRB, CYBA, ACE, ECE1, KCNJ8, COL1A2, ADRA1B, GAA, ABAT, GUCY1B3, MAP2K6	729	67	4909	2.31163	0.372143	0.030553	0.276123
GOTERM_BP_FAT	GO:0008015~blood circulation	23	2.26824	0.000153347	CAV1, ACVRL1, ADORA2B, PTGS2, ACTA2, ELN, PTGS1, ATP1A1, SERPING1, NPR3, TPM1, SOD2, EDNRB, CYBA, ACE, ECE1, KCNJ8, COL1A2, ADRA1B, GAA, ABAT, GUCY1B3, MAP2K6	729	67	4909	2.31163	0.372143	0.030553	0.276123
GOTERM_BP_FAT	GO:0008217~regulation of blood pressure	15	1.47929	0.000346828	ACVRL1, PTGS2, ACTA2, PTGS1, ATP1A1, NPR3, TPM1, SOD2, EDNRB, CYBA, ACE, ECE1, COL1A2, ADRA1B, ABAT	729	36	4909	2.80578	0.651042	0.0568115	0.623487
Annotation Cluster 4	Enrichment Score: 3.370830779724904
Category	Term	Count	%	PValue	Genes	List Total	Pop Hits	Pop Total	Fold Enrichment	Bonferroni	Benjamini	FDR
GOTERM_CC_FAT	GO:0031226~intrinsic to plasma membrane	75	7.39645	0.00023079	GYPC, ACVRL1, GM2A, SLC20A2, SLC7A8, ANPEP, LPAR1, SLC7A6, EDNRB, S1PR3, ROBO1, GPC6, KCNK6, CALCRL, SLC1A1, SLC43A1, RAMP2, PTPRM, F10, PTPRG, PDPN, MFI2, LIFR, STIM1, PTPRN, IL11RA, THY1, CD82, CD81, PDGFRA, ROR2, PDGFRB, HAS2, VAMP2, ROM1, FGFR1, CAV1, IL1R1, ADORA2B, PTK7, NINJ2, ITGA10, MME, NEO1, GPR1, ITGB1, EPHB1, EPHB6, PROCR, PRRG1, CNR1, GPNMB, DCLK1, PTPRD, SLC12A2, TGFBR2, SLC6A15, G…	685	340	4615	1.48615	0.0934391	0.0108405	0.324257
GOTERM_CC_FAT	GO:0005887~integral to plasma membrane	73	7.19921	0.000236393	GYPC, ACVRL1, GM2A, SLC20A2, SLC7A8, ANPEP, LPAR1, SLC7A6, EDNRB, S1PR3, ROBO1, GPC6, KCNK6, CALCRL, SLC1A1, SLC43A1, RAMP2, PTPRM, PTPRG, PDPN, MFI2, LIFR, STIM1, PTPRN, IL11RA, THY1, CD82, CD81, PDGFRA, ROR2, PDGFRB, HAS2, VAMP2, ROM1, FGFR1, CAV1, IL1R1, ADORA2B, PTK7, NINJ2, ITGA10, MME, NEO1, GPR1, ITGB1, EPHB1, EPHB6, PROCR, PRRG1, CNR1, GPNMB, DCLK1, PTPRD, SLC12A2, TGFBR2, SLC6A15, GPR137…	685	329	4615	1.49489	0.0955959	0.00999759	0.332117
GOTERM_CC_FAT	GO:0044459~plasma membrane part	137	13.5108	0.00141467	PTGS2, SLC7A8, LPAR1, ITSN1, SLC7A6, PNN, B2M, S1PR3, DIRAS3, ROBO1, KCNK6, WNK4, GNG2, STAM, F10, PTPRM, PDPN, PTPRG, MFI2, LIFR, STIM1, MFGE8, PTPRN, IL11RA, THY1, TNS1, CD34, PDGFRA, PDGFRB, ROR2, HAS2, RAB13, VAMP2, RAB10, DST, FGFR1, IL1R1, CAV1, ADORA2B, PTK7, NINJ2, ITGA10, MME, ITGB1, EPHB1, PXN, SRC, ALCAM, EPHB6, ACE, ECE1, MACF1, PROCR, CNR1, TMEM123, LAMB1, FN1, B4GALT1, RAB8B, MAOA, …	685	733	4615	1.25921	0.452099	0.045227	1.97229
Annotation Cluster 5	Enrichment Score: 3.2113320062603807
Category	Term	Count	%	PValue	Genes	List Total	Pop Hits	Pop Total	Fold Enrichment	Bonferroni	Benjamini	FDR
GOTERM_BP_FAT	GO:0006928~cell motion	48	4.73373	0.000478909	ACVRL1, NRP1, PTGS2, FUT8, IL16, PLXNA2, CALD1, FPR1, ZEB2, PAX3, SRF, ITGB1, TPM1, PTEN, EPHB1, SRC, TGFB2, SEMA5A, ALCAM, EDNRB, MACF1, ROBO1, ANG, PTK2B, PAFAH1B1, SEMA3A, THBS1, SPON2, PPAP2B, DCLK1, FN1, B4GALT1, S100P, PTPRM, EMX2, GAS1, CERCAM, EPHA4, TNS1, CD34, BTG1, ITGA5, TGFBR3, PDGFRB, VCAN, JAK2, LAMC1, APBB2	729	198	4909	1.63246	0.766328	0.0736636	0.859961
GOTERM_BP_FAT	GO:0016477~cell migration	33	3.25444	0.000543646	ACVRL1, NRP1, FUT8, IL16, PLXNA2, ZEB2, PAX3, SRF, ITGB1, PTEN, SRC, TGFB2, EDNRB, ROBO1, ANG, PTK2B, PAFAH1B1, THBS1, PPAP2B, DCLK1, FN1, B4GALT1, S100P, EMX2, TNS1, CD34, ITGA5, BTG1, PDGFRB, TGFBR3, VCAN, LAMC1, APBB2	729	121	4909	1.83651	0.80803	0.0792076	0.975669
GOTERM_BP_FAT	GO:0048870~cell motility	33	3.25444	0.000740545	ACVRL1, NRP1, FUT8, IL16, PLXNA2, ZEB2, PAX3, SRF, ITGB1, PTEN, SRC, TGFB2, EDNRB, ROBO1, ANG, PTK2B, PAFAH1B1, THBS1, PPAP2B, DCLK1, FN1, B4GALT1, S100P, EMX2, TNS1, CD34, ITGA5, BTG1, PDGFRB, TGFBR3, VCAN, LAMC1, APBB2	729	123	4909	1.80665	0.89443	0.101534	1.32682
GOTERM_BP_FAT	GO:0051674~localization of cell	33	3.25444	0.000740545	ACVRL1, NRP1, FUT8, IL16, PLXNA2, ZEB2, PAX3, SRF, ITGB1, PTEN, SRC, TGFB2, EDNRB, ROBO1, ANG, PTK2B, PAFAH1B1, THBS1, PPAP2B, DCLK1, FN1, B4GALT1, S100P, EMX2, TNS1, CD34, ITGA5, BTG1, PDGFRB, TGFBR3, VCAN, LAMC1, APBB2	729	123	4909	1.80665	0.89443	0.101534	1.32682
Annotation Cluster 6	Enrichment Score: 2.9243070824142534
Category	Term	Count	%	PValue	Genes	List Total	Pop Hits	Pop Total	Fold Enrichment	Bonferroni	Benjamini	FDR
GOTERM_MF_FAT	GO:0030246~carbohydrate binding	34	3.35306	0.000365129	FGFR1, CDIPT, FGF7, CD248, HEXB, FSTL1, POSTN, DCN, MDK, PKD1L2, ANG, CRISPLD2, PAFAH1B1, THBS1, GPNMB, FN1, PRG4, MRC2, TGFBR2, CCDC80, PFKM, MANBA, CLEC11A, PRELP, MAN2A1, BGN, CD34, CLEC3B, NAV2, GFPT2, GAA, TGFBR3, ADAMTS1, VCAN	706	121	4649	1.85033	0.276434	0.102242	0.566484
GOTERM_MF_FAT	GO:0005539~glycosaminoglycan binding	20	1.97239	0.00145923	FGFR1, FGF7, TGFBR2, CCDC80, POSTN, FSTL1, DCN, MDK, PRELP, BGN, ANG, CRISPLD2, NAV2, TGFBR3, ADAMTS1, VCAN, PAFAH1B1, GPNMB, THBS1, FN1	706	62	4649	2.12419	0.725778	0.168755	2.24601
GOTERM_MF_FAT	GO:0030247~polysaccharide binding	21	2.07101	0.00158286	FGFR1, FGF7, PRG4, TGFBR2, CCDC80, POSTN, FSTL1, DCN, MDK, PRELP, BGN, ANG, CRISPLD2, NAV2, TGFBR3, ADAMTS1, VCAN, PAFAH1B1, GPNMB, THBS1, FN1	706	67	4649	2.06395	0.754271	0.160913	2.43412
GOTERM_MF_FAT	GO:0001871~pattern binding	21	2.07101	0.00158286	FGFR1, FGF7, PRG4, TGFBR2, CCDC80, POSTN, FSTL1, DCN, MDK, PRELP, BGN, ANG, CRISPLD2, NAV2, TGFBR3, ADAMTS1, VCAN, PAFAH1B1, GPNMB, THBS1, FN1	706	67	4649	2.06395	0.754271	0.160913	2.43412
GOTERM_MF_FAT	GO:0008201~heparin binding	16	1.57791	0.00179064	FGFR1, FGF7, CCDC80, POSTN, FSTL1, MDK, PRELP, ANG, CRISPLD2, NAV2, TGFBR3, PAFAH1B1, ADAMTS1, GPNMB, THBS1, FN1	706	45	4649	2.34133	0.795652	0.146827	2.7495
Annotation Cluster 7	Enrichment Score: 2.814329184216995
Category	Term	Count	%	PValue	Genes	List Total	Pop Hits	Pop Total	Fold Enrichment	Bonferroni	Benjamini	FDR
GOTERM_BP_FAT	GO:0009746~response to hexose stimulus	9	0.887574	0.000958269	GLUL, PTGS2, TXN2, PTK2B, TGFBR2, COL6A2, PTPRN, THBS1, PTEN	729	16	4909	3.78781	0.94551	0.109872	1.71373
GOTERM_BP_FAT	GO:0034284~response to monosaccharide stimulus	9	0.887574	0.000958269	GLUL, PTGS2, TXN2, PTK2B, TGFBR2, COL6A2, PTPRN, THBS1, PTEN	729	16	4909	3.78781	0.94551	0.109872	1.71373
GOTERM_BP_FAT	GO:0009743~response to carbohydrate stimulus	10	0.986193	0.00181315	GLUL, PTGS2, TXN2, PTK2B, MAP1B, TGFBR2, COL6A2, PTPRN, THBS1, PTEN	729	21	4909	3.20661	0.995945	0.158124	3.21913
GOTERM_BP_FAT	GO:0009749~response to glucose stimulus	8	0.788955	0.00332104	GLUL, TXN2, PTK2B, TGFBR2, COL6A2, PTPRN, THBS1, PTEN	729	15	4909	3.5914	0.999959	0.213674	5.82147
Annotation Cluster 8	Enrichment Score: 2.4488328148183327
Category	Term	Count	%	PValue	Genes	List Total	Pop Hits	Pop Total	Fold Enrichment	Bonferroni	Benjamini	FDR
GOTERM_BP_FAT	GO:0035295~tube development	29	2.85996	0.000743883	WNT5A, FGF18, FGF7, NRP1, PTK7, ZEB2, PAX3, SRF, SEMA5A, RGMA, HAND2, CRISPLD2, PLXND1, IPMK, B4GALT1, LIPA, MAN1A2, PDPN, TGFBR2, MGP, BCL2L11, PTHLH, MAN2A1, EP300, HSD11B1, PDGFRA, APAF1, ADAMTS2, NFIB	729	103	4909	1.89595	0.895495	0.0975664	1.33276
GOTERM_BP_FAT	GO:0060541~respiratory system development	17	1.67653	0.00392702	WNT5A, FGF18, FGF7, LIPA, MAN1A2, PDPN, TGFBR2, MGP, PTHLH, MAN2A1, EP300, CRISPLD2, ALDH1A3, HSD11B1, PDGFRA, ADAMTS2, NFIB	729	54	4909	2.11993	0.999993	0.224374	6.84855
GOTERM_BP_FAT	GO:0030324~lung development	16	1.57791	0.0055694	WNT5A, FGF18, FGF7, LIPA, MAN1A2, PDPN, TGFBR2, MGP, PTHLH, MAN2A1, EP300, CRISPLD2, HSD11B1, PDGFRA, ADAMTS2, NFIB	729	51	4909	2.11259	1	0.261168	9.5793
GOTERM_BP_FAT	GO:0030323~respiratory tube development	16	1.57791	0.00984675	WNT5A, FGF18, FGF7, LIPA, MAN1A2, PDPN, TGFBR2, MGP, PTHLH, MAN2A1, EP300, CRISPLD2, HSD11B1, PDGFRA, ADAMTS2, NFIB	729	54	4909	1.99522	1	0.374539	16.3406
Annotation Cluster 9	Enrichment Score: 2.415365724333864
Category	Term	Count	%	PValue	Genes	List Total	Pop Hits	Pop Total	Fold Enrichment	Bonferroni	Benjamini	FDR
GOTERM_BP_FAT	GO:0048598~embryonic morphogenesis	33	3.25444	0.000543646	WNT5A, UGDH, PTK7, SOBP, ZEB2, PAX3, ZBTB16, ZEB1, RGMA, OSR2, ECE1, HOXA3, MACF1, HLX, ALDH1A3, CHST11, COL11A1, MYC, IPMK, PPAP2B, TBX15, TGFBR2, SIX2, GAS1, EYA2, MSX1, DKK1, ITGA8, CDON, ROR2, GNAS, APAF1, TBX18	729	121	4909	1.83651	0.80803	0.0792076	0.975669
GOTERM_BP_FAT	GO:0043009~chordate embryonic development	38	3.74753	0.0010114	ACVRL1, FUT8, PTK7, ZEB2, ZEB1, PAX3, SRF, ITGB1, TPM1, ARNT, RGMA, OSR2, ECE1, HOXA3, HAND2, CHST11, COL11A1, IPMK, TBX15, NASP, TGFBR2, SIX2, GAS1, BCL2L11, MAN2A1, TJP1, MSX1, EP300, SFRP1, PDGFRA, TGFBR3, PDGFRB, ROR2, GNAS, KIAA1217, APAF1, COL1A1, TBX18	729	151	4909	1.69462	0.953633	0.111412	1.80794
GOTERM_BP_FAT	GO:0009792~embryonic development ending in birth or egg hatching	38	3.74753	0.0011523	ACVRL1, FUT8, PTK7, ZEB2, ZEB1, PAX3, SRF, ITGB1, TPM1, ARNT, RGMA, OSR2, ECE1, HOXA3, HAND2, CHST11, COL11A1, IPMK, TBX15, NASP, TGFBR2, SIX2, GAS1, BCL2L11, MAN2A1, TJP1, MSX1, EP300, SFRP1, PDGFRA, TGFBR3, PDGFRB, ROR2, GNAS, KIAA1217, APAF1, COL1A1, TBX18	729	152	4909	1.68347	0.96978	0.117479	2.05733
GOTERM_BP_FAT	GO:0001701~in utero embryonic development	15	1.47929	0.344138	ACVRL1, FUT8, NASP, SRF, TPM1, ITGB1, BCL2L11, ARNT, MAN2A1, TJP1, MSX1, HAND2, PDGFRA, TGFBR3, PDGFRB	729	83	4909	1.21697	1	0.984547	99.9502
Annotation Cluster 10	Enrichment Score: 2.383155703620334
Category	Term	Count	%	PValue	Genes	List Total	Pop Hits	Pop Total	Fold Enrichment	Bonferroni	Benjamini	FDR
GOTERM_BP_FAT	GO:0048705~skeletal system morphogenesis	22	2.16963	2.31747e-05	FGF18, TBX15, BMP1, TGFBR2, MGP, SIX2, ZEB1, GAS1, MMP2, PTHLH, HOXD8, HOXA3, OSR2, CHST11, PDGFRA, ROR2, PDGFRB, GNAS, COL1A1, COL11A1, MYC, IDUA	729	56	4909	2.64545	0.0679193	0.00637378	0.0417757
GOTERM_BP_FAT	GO:0048562~embryonic organ morphogenesis	16	1.57791	0.000835476	TBX15, TGFBR2, SIX2, SOBP, GAS1, ZEB1, HOXA3, OSR2, ALDH1A3, ITGA8, HLX, CHST11, ROR2, GNAS, COL11A1, MYC	729	43	4909	2.50563	0.920875	0.104428	1.49569
GOTERM_BP_FAT	GO:0048704~embryonic skeletal system morphogenesis	10	0.986193	0.00965776	OSR2, TBX15, HOXA3, CHST11, TGFBR2, SIX2, GNAS, ZEB1, GAS1, COL11A1	729	26	4909	2.58995	1	0.373446	16.0523
GOTERM_BP_FAT	GO:0048568~embryonic organ development	17	1.67653	0.0161733	TBX15, TGFBR2, SIX2, SOBP, GAS1, ZEB1, ARNT, HOXA3, OSR2, ALDH1A3, ITGA8, HLX, CHST11, ROR2, GNAS, COL11A1, MYC	729	62	4909	1.84639	1	0.457167	25.4715
GOTERM_BP_FAT	GO:0048706~embryonic skeletal system development	12	1.18343	0.0186897	OSR2, TBX15, HOXA3, CHST11, TGFBR2, SIX2, GNAS, KIAA1217, ZEB1, COL1A1, GAS1, COL11A1	729	38	4909	2.12649	1	0.490155	28.8347
GOTERM_BP_FAT	GO:0048701~embryonic cranial skeleton morphogenesis	5	0.493097	0.0888873	TBX15, CHST11, TGFBR2, GNAS, GAS1	729	12	4909	2.80578	1	0.828946	81.3325
Annotation Cluster 11	Enrichment Score: 2.205974640539464
Category	Term	Count	%	PValue	Genes	List Total	Pop Hits	Pop Total	Fold Enrichment	Bonferroni	Benjamini	FDR
GOTERM_CC_FAT	GO:0031983~vesicle lumen	12	1.18343	0.000103398	SERPINF2, CLU, ANPEP, SERPING1, SPARC, CFD, THBS1, FIGF, PROS1, SRGN, TGFB2, FN1	685	22	4615	3.67485	0.0429947	0.00547824	0.145394
GOTERM_CC_FAT	GO:0060205~cytoplasmic membrane-bounded vesicle lumen	11	1.08481	0.000358089	SERPINF2, CLU, SERPING1, SPARC, CFD, THBS1, FIGF, PROS1, SRGN, TGFB2, FN1	685	21	4615	3.52902	0.141196	0.0137424	0.502692
GOTERM_CC_FAT	GO:0031093~platelet alpha granule lumen	11	1.08481	0.000358089	SERPINF2, CLU, SERPING1, SPARC, CFD, THBS1, FIGF, PROS1, SRGN, TGFB2, FN1	685	21	4615	3.52902	0.141196	0.0137424	0.502692
GOTERM_CC_FAT	GO:0030141~secretory granule	21	2.07101	0.000494167	CLU, HEXB, FSTL3, SERPING1, SPARC, ITPR1, TGFB2, PCSK2, CYBA, LAMP2, ECE1, SERPINF2, SCG5, VAMP2, CFD, THBS1, FIGF, FNDC3A, PROS1, SRGN, FN1	685	63	4615	2.24574	0.189475	0.0173537	0.693105
GOTERM_CC_FAT	GO:0031091~platelet alpha granule	11	1.08481	0.00189282	SERPINF2, CLU, SERPING1, SPARC, CFD, THBS1, FIGF, PROS1, SRGN, TGFB2, FN1	685	25	4615	2.96438	0.553007	0.0558925	2.63071
GOTERM_CC_FAT	GO:0031982~vesicle	53	5.22682	0.055215	KIAA0368, HIP1R, HEXB, FSTL3, NAP1L1, ANPEP, ITSN1, TGFB2, AP2B1, MAP1LC3A, SNTB2, IL15RA, CFD, FNDC3A, PIGT, SERPING1, BGN, STXBP5, PRDX6, CLIC4, SERPINF2, ADAMTS1, GNAS, CTSB, VAMP2, RAB13, PROS1, DST, CAV1, CLU, ITGB1, AMPH, PCSK2, ECE1, CRISPLD2, SCG5, THBS1, GPNMB, FIGF, EHD3, SRGN, FN1, P4HB, BMP1, RAB8B, ATP1A1, SPARC, WIPI1, ITPR1, LAMP1, CYBA, LAMP2, TFRC	685	284	4615	1.2573	1	0.508343	55.0314
GOTERM_CC_FAT	GO:0031410~cytoplasmic vesicle	50	4.93097	0.0814064	CAV1, KIAA0368, HIP1R, CLU, HEXB, FSTL3, NAP1L1, ITSN1, ITGB1, AMPH, TGFB2, PCSK2, AP2B1, ECE1, MAP1LC3A, CRISPLD2, IL15RA, SNTB2, SCG5, CFD, GPNMB, THBS1, FIGF, FNDC3A, EHD3, SRGN, FN1, P4HB, RAB8B, PIGT, SERPING1, ATP1A1, SPARC, WIPI1, ITPR1, CYBA, LAMP1, LAMP2, BGN, TFRC, STXBP5, PRDX6, SERPINF2, CLIC4, ADAMTS1, VAMP2, CTSB, RAB13, PROS1, DST	685	273	4615	1.23392	1	0.622934	69.7234
GOTERM_CC_FAT	GO:0044433~cytoplasmic vesicle part	16	1.57791	0.103567	HIP1R, CLU, SERPING1, SPARC, ITPR1, TGFB2, LAMP2, AP2B1, SERPINF2, VAMP2, CFD, THBS1, FIGF, PROS1, SRGN, FN1	685	72	4615	1.49716	1	0.687031	78.528
GOTERM_CC_FAT	GO:0031988~membrane-bounded vesicle	44	4.33925	0.110469	KIAA0368, HIP1R, CLU, HEXB, FSTL3, NAP1L1, ANPEP, ITSN1, ITGB1, AMPH, TGFB2, PCSK2, AP2B1, ECE1, CRISPLD2, SCG5, CFD, GPNMB, THBS1, FIGF, FNDC3A, EHD3, SRGN, FN1, P4HB, BMP1, PIGT, SERPING1, ATP1A1, SPARC, WIPI1, ITPR1, CYBA, LAMP1, LAMP2, BGN, TFRC, STXBP5, PRDX6, SERPINF2, VAMP2, CTSB, PROS1, DST	685	242	4615	1.22495	1	0.685572	80.7407
GOTERM_CC_FAT	GO:0016023~cytoplasmic membrane-bounded vesicle	42	4.14201	0.136646	KIAA0368, HIP1R, CLU, HEXB, FSTL3, NAP1L1, ITSN1, ITGB1, AMPH, TGFB2, PCSK2, AP2B1, ECE1, CRISPLD2, SCG5, CFD, THBS1, GPNMB, FIGF, FNDC3A, EHD3, SRGN, FN1, P4HB, PIGT, SERPING1, ATP1A1, SPARC, WIPI1, ITPR1, CYBA, LAMP1, LAMP2, BGN, TFRC, PRDX6, SERPINF2, STXBP5, VAMP2, CTSB, PROS1, DST	685	234	4615	1.20925	1	0.750346	87.3495
Annotation Cluster 12	Enrichment Score: 2.137286289121321
Category	Term	Count	%	PValue	Genes	List Total	Pop Hits	Pop Total	Fold Enrichment	Bonferroni	Benjamini	FDR
GOTERM_BP_FAT	GO:0031175~neuron projection development	28	2.76134	0.00194026	FGFR1, NRP1, CLU, PTEN, EPHB1, ALCAM, SEMA5A, MACF1, PTK2B, ROBO1, PAFAH1B1, SEMA3A, LAMB1, SPON2, DCLK1, PTPRM, BAIAP2, MAP1B, LIFR, CHST3, GAS1, PTPN11, EPHA4, NEDD4, JAK2, VCAN, APBB2, DST	729	104	4909	1.81297	0.997245	0.159169	3.44109
GOTERM_BP_FAT	GO:0000904~cell morphogenesis involved in differentiation	27	2.66272	0.00195739	NRP1, EPHB1, TGFB2, ALCAM, SEMA5A, MACF1, ROBO1, PAFAH1B1, SEMA3A, LAMB1, SPON2, DCLK1, FN1, COL18A1, PTPRM, BAIAP2, MAP1B, CHST3, GAS1, PTPN11, EPHA4, TGFBR3, JAK2, VCAN, LAMC1, APBB2, DST	729	99	4909	1.83651	0.997385	0.156251	3.47096
GOTERM_BP_FAT	GO:0048666~neuron development	33	3.25444	0.00228926	FGFR1, NRP1, CLU, SRF, PTEN, EPHB1, TGFB2, SEMA5A, ALCAM, MACF1, ROBO1, PTK2B, PAFAH1B1, SEMA3A, LAMB1, SPON2, DCLK1, PTPRM, BAIAP2, MAP1B, LIFR, CHST3, GAS1, SOD2, PTPN11, THY1, CDKN1C, EPHA4, NEDD4, JAK2, VCAN, APBB2, DST	729	131	4909	1.69632	0.999047	0.171382	4.04804
GOTERM_BP_FAT	GO:0000902~cell morphogenesis	37	3.64892	0.00252233	NRP1, CLU, PTK7, EPHB1, TGFB2, SEMA5A, ALCAM, MACF1, ROBO1, PAFAH1B1, BCL6, SEMA3A, LAMB1, SPON2, DCLK1, IDUA, DLG1, FN1, COL18A1, ARHGEF2, PTPRM, LIPA, PDPN, BAIAP2, PCNT, MAP1B, LIFR, CHST3, GAS1, PTPN11, EPHA4, TGFBR3, JAK2, VCAN, LAMC1, APBB2, DST	729	153	4909	1.62846	0.999531	0.182667	4.45138
GOTERM_BP_FAT	GO:0032989~cellular component morphogenesis	39	3.84615	0.00362346	NRP1, CLU, PTK7, ITGB1, TPM1, EPHB1, TGFB2, SEMA5A, ALCAM, MACF1, ROBO1, PAFAH1B1, BCL6, SEMA3A, LAMB1, SPON2, DCLK1, IDUA, DLG1, FN1, COL18A1, ARHGEF2, PTPRM, LIPA, PDPN, BAIAP2, PCNT, MAP1B, LIFR, CHST3, GAS1, PTPN11, EPHA4, TGFBR3, JAK2, VCAN, LAMC1, APBB2, DST	729	167	4909	1.57258	0.999984	0.221503	6.33538
GOTERM_BP_FAT	GO:0048812~neuron projection morphogenesis	23	2.26824	0.00511508	NRP1, PTPRM, BAIAP2, CLU, MAP1B, LIFR, CHST3, GAS1, EPHB1, PTPN11, SEMA5A, ALCAM, EPHA4, MACF1, ROBO1, JAK2, VCAN, PAFAH1B1, SEMA3A, SPON2, APBB2, DST, DCLK1	729	85	4909	1.82211	1	0.263008	8.83157
GOTERM_BP_FAT	GO:0007409~axonogenesis	21	2.07101	0.00518676	NRP1, PTPRM, BAIAP2, MAP1B, CHST3, GAS1, EPHB1, PTPN11, SEMA5A, ALCAM, EPHA4, MACF1, ROBO1, JAK2, VCAN, PAFAH1B1, SEMA3A, SPON2, APBB2, DST, DCLK1	729	75	4909	1.88549	1	0.257541	8.94992
GOTERM_BP_FAT	GO:0030182~neuron differentiation	37	3.64892	0.00755423	FGFR1, NRP1, CLU, PAX3, SRF, PTEN, EPHB1, TGFB2, SEMA5A, ALCAM, MACF1, ROBO1, PTK2B, PAFAH1B1, SEMA3A, LAMB1, SPON2, DCLK1, PTPRM, BAIAP2, MAP1B, EMX2, LIFR, PIGT, CHST3, GAS1, SOD2, PTPN11, THY1, CDKN1C, EPHA4, NEDD4, JAK2, VCAN, APBB2, CLN8, DST	729	163	4909	1.52855	1	0.322991	12.7785
GOTERM_BP_FAT	GO:0048667~cell morphogenesis involved in neuron differentiation	21	2.07101	0.0110608	NRP1, PTPRM, BAIAP2, MAP1B, CHST3, GAS1, EPHB1, PTPN11, SEMA5A, ALCAM, EPHA4, MACF1, ROBO1, JAK2, VCAN, PAFAH1B1, SEMA3A, SPON2, APBB2, DST, DCLK1	729	80	4909	1.76764	1	0.400382	18.1709
GOTERM_BP_FAT	GO:0048858~cell projection morphogenesis	24	2.36686	0.0258268	NRP1, PTPRM, BAIAP2, PCNT, CLU, MAP1B, LIFR, CHST3, GAS1, EPHB1, PTPN11, SEMA5A, ALCAM, EPHA4, MACF1, ROBO1, JAK2, VCAN, PAFAH1B1, SEMA3A, SPON2, APBB2, DST, DCLK1	729	103	4909	1.56906	1	0.566534	37.6107
GOTERM_BP_FAT	GO:0030030~cell projection organization	33	3.25444	0.0266543	FGFR1, NRP1, CLU, LPAR1, PTEN, TPM1, EPHB1, SEMA5A, ALCAM, MACF1, ROBO1, IFT20, PTK2B, PAFAH1B1, SEMA3A, LAMB1, SPON2, DCLK1, PTPRM, BAIAP2, PCNT, MAP1B, LIFR, CHST3, GAS1, PTPN11, EPHA4, NEDD4, ITGA8, JAK2, VCAN, APBB2, DST	729	154	4909	1.44297	1	0.574333	38.5593
GOTERM_BP_FAT	GO:0032990~cell part morphogenesis	24	2.36686	0.0351405	NRP1, PTPRM, BAIAP2, PCNT, CLU, MAP1B, LIFR, CHST3, GAS1, EPHB1, PTPN11, SEMA5A, ALCAM, EPHA4, MACF1, ROBO1, JAK2, VCAN, PAFAH1B1, SEMA3A, SPON2, APBB2, DST, DCLK1	729	106	4909	1.52465	1	0.630667	47.5328
GOTERM_BP_FAT	GO:0007411~axon guidance	11	1.08481	0.0385257	ALCAM, SEMA5A, EPHA4, PTPRM, NRP1, ROBO1, SEMA3A, GAS1, APBB2, SPON2, EPHB1	729	37	4909	2.00196	1	0.658433	50.7545
Annotation Cluster 13	Enrichment Score: 1.9516996090957046
Category	Term	Count	%	PValue	Genes	List Total	Pop Hits	Pop Total	Fold Enrichment	Bonferroni	Benjamini	FDR
GOTERM_BP_FAT	GO:0007610~behavior	36	3.5503	0.00140204	PTGS2, GM2A, IL16, CXCL2, HEXB, FPR1, SOBP, COMT, PTEN, APLP2, TGFB2, AMPH, PLCL1, EDNRB, NPHP4, BCHE, ROBO1, CNR1, PAFAH1B1, SEMA3A, NOVA1, EGR1, STS, S100P, MAOA, SOD2, EPHA4, ITGA5, JUN, ITGA8, HIPK2, ADRA1B, GAA, ABAT, PDGFRB, CLN8	729	143	4909	1.69524	0.985852	0.128344	2.49792
GOTERM_BP_FAT	GO:0007611~learning or memory	15	1.47929	0.00959742	EGR1, STS, S100P, PTGS2, GM2A, COMT, PTEN, AMPH, BCHE, ITGA5, JUN, ITGA8, ADRA1B, PAFAH1B1, CLN8	729	49	4909	2.06139	1	0.376295	15.96
GOTERM_BP_FAT	GO:0050890~cognition	30	2.95858	0.0223423	ABLIM1, GM2A, OR1J2, PTGS2, HEXB, SOBP, PAX3, COMT, PTEN, TIMP3, AMPH, BCHE, TGFBI, PAFAH1B1, COL11A1, MYC, EGR1, COL18A1, STS, S100P, SLC12A2, DHRS3, ITGA5, JUN, ITGA8, ADRA1B, GNAS, COL1A1, CLN8, ROM1	729	135	4909	1.49642	1	0.533257	33.4622
GOTERM_BP_FAT	GO:0050877~neurological system process	40	3.94477	0.0518991	ABLIM1, PTGS2, GM2A, OR1J2, HEXB, SOBP, PAX3, COMT, TIMP3, PTEN, APLP2, AMPH, BCHE, TGFBI, PAFAH1B1, COL11A1, MYC, SLC1A1, NOVA1, DTNA, EGR1, COL18A1, STS, EGR3, S100P, SLC12A2, MAOA, SOD2, DHRS3, PDE7B, ITGA5, JUN, ITGA8, ADRA1B, GAA, ABAT, GNAS, COL1A1, CLN8, ROM1	729	204	4909	1.32037	1	0.717382	61.745
Annotation Cluster 14	Enrichment Score: 1.7852346131972425
Category	Term	Count	%	PValue	Genes	List Total	Pop Hits	Pop Total	Fold Enrichment	Bonferroni	Benjamini	FDR
GOTERM_MF_FAT	GO:0048407~platelet-derived growth factor binding	6	0.591716	0.00297135	COL3A1, COL1A2, PDGFRA, PDGFRB, COL6A1, COL1A1	706	8	4649	4.93874	0.928391	0.213124	4.52357
GOTERM_CC_FAT	GO:0005581~collagen	9	0.887574	0.0139596	COL18A1, COL6A3, COL3A1, COL1A2, COL6A1, COL1A1, COL16A1, COL5A2, COL11A1	685	23	4615	2.63631	0.997458	0.237822	17.9475
GOTERM_BP_FAT	GO:0030199~collagen fibril organization	9	0.887574	0.0183696	COL3A1, COL1A2, COL1A1, SERPINH1, COL5A2, COL11A1, ADAMTS2, DPT, TGFB2	729	24	4909	2.52521	1	0.488231	28.4149
GOTERM_BP_FAT	GO:0043588~skin development	6	0.591716	0.0324817	STS, COL3A1, COL1A2, COL1A1, COL5A2, ADAMTS2	729	13	4909	3.10795	1	0.608051	44.864
GOTERM_CC_FAT	GO:0005583~fibrillar collagen	5	0.493097	0.0478918	COL3A1, COL1A2, COL1A1, COL5A2, COL11A1	685	10	4615	3.36861	1	0.468497	49.8705
Annotation Cluster 15	Enrichment Score: 1.7286730880901224
Category	Term	Count	%	PValue	Genes	List Total	Pop Hits	Pop Total	Fold Enrichment	Bonferroni	Benjamini	FDR
GOTERM_BP_FAT	GO:0007178~transmembrane receptor protein serine/threonine kinase signaling pathway	16	1.57791	0.013908	FMOD, ACVRL1, FUT8, LTBP3, COL3A1, FST, TGFBR2, FSTL1, TGFB2, UBE2D3, MSX1, JUN, HIPK2, COL1A2, TGFBR3, HPGD	729	56	4909	1.92397	1	0.436969	22.3161
GOTERM_MF_FAT	GO:0046332~SMAD binding	10	0.986193	0.0145327	ACVRL1, JUN, HIPK2, COL3A1, TGFBR2, COL1A2, TGFBR3, ZEB2, COL5A2, PURA	706	27	4649	2.43888	0.999998	0.578821	20.3659
GOTERM_BP_FAT	GO:0007179~transforming growth factor beta receptor signaling pathway	11	1.08481	0.032238	FMOD, ACVRL1, FUT8, LTBP3, JUN, COL3A1, TGFBR2, COL1A2, TGFBR3, HPGD, TGFB2	729	36	4909	2.05758	1	0.608687	44.6131
Annotation Cluster 16	Enrichment Score: 1.7144795316351873
Category	Term	Count	%	PValue	Genes	List Total	Pop Hits	Pop Total	Fold Enrichment	Bonferroni	Benjamini	FDR
GOTERM_BP_FAT	GO:0051270~regulation of cell motion	29	2.85996	0.00103312	NRP1, ACVRL1, CSF1, PTEN, TPM1, TGFB2, ACE, PTK2B, BCL6, SEMA3A, LAMB1, THBS1, PIK3R1, B4GALT1, COL18A1, F10, PTPRM, PDPN, CHST3, NEXN, THY1, LAMA2, CLIC4, ALOX15B, PDGFRA, PDGFRB, TGFBR3, JAK2, IGFBP5	729	105	4909	1.85983	0.956593	0.109694	1.84641
GOTERM_BP_FAT	GO:0030334~regulation of cell migration	24	2.36686	0.00318451	COL18A1, F10, ACVRL1, PTPRM, PDPN, CSF1, NEXN, PTEN, TPM1, TGFB2, THY1, LAMA2, ACE, CLIC4, ALOX15B, PTK2B, PDGFRA, PDGFRB, TGFBR3, JAK2, LAMB1, THBS1, PIK3R1, IGFBP5	729	87	4909	1.85762	0.999938	0.210304	5.58859
GOTERM_BP_FAT	GO:0040012~regulation of locomotion	25	2.46548	0.00368294	COL18A1, F10, PTPRM, ACVRL1, IL16, PDPN, CSF1, NEXN, TPM1, PTEN, THY1, TGFB2, LAMA2, ACE, PTK2B, CLIC4, ALOX15B, PDGFRA, TGFBR3, PDGFRB, JAK2, LAMB1, THBS1, PIK3R1, IGFBP5	729	93	4909	1.81018	0.999986	0.220305	6.43614
GOTERM_BP_FAT	GO:0040013~negative regulation of locomotion	10	0.986193	0.0382261	PTPRM, ACVRL1, ALOX15B, CLIC4, TGFBR3, THBS1, TPM1, PTEN, IGFBP5, THY1	729	32	4909	2.10434	1	0.658832	50.4771
GOTERM_BP_FAT	GO:0030336~negative regulation of cell migration	10	0.986193	0.0382261	PTPRM, ACVRL1, ALOX15B, CLIC4, TGFBR3, THBS1, TPM1, PTEN, IGFBP5, THY1	729	32	4909	2.10434	1	0.658832	50.4771
GOTERM_BP_FAT	GO:0051272~positive regulation of cell motion	14	1.38067	0.0549142	COL18A1, F10, PDPN, CSF1, CHST3, TGFB2, PTK2B, PDGFRA, PDGFRB, BCL6, JAK2, THBS1, LAMB1, PIK3R1	729	55	4909	1.71408	1	0.721746	63.8801
GOTERM_BP_FAT	GO:0040017~positive regulation of locomotion	13	1.28205	0.0575124	COL18A1, F10, IL16, PDPN, CSF1, TGFB2, PTK2B, PDGFRA, PDGFRB, JAK2, THBS1, LAMB1, PIK3R1	729	50	4909	1.75081	1	0.728199	65.6292
GOTERM_BP_FAT	GO:0051271~negative regulation of cell motion	10	0.986193	0.0748528	PTPRM, ACVRL1, ALOX15B, CLIC4, TGFBR3, THBS1, TPM1, PTEN, IGFBP5, THY1	729	36	4909	1.87052	1	0.790656	75.4087
GOTERM_BP_FAT	GO:0030335~positive regulation of cell migration	12	1.18343	0.0886998	COL18A1, F10, PDPN, PTK2B, CSF1, PDGFRA, PDGFRB, JAK2, LAMB1, THBS1, PIK3R1, TGFB2	729	48	4909	1.68347	1	0.830169	81.2632
Annotation Cluster 17	Enrichment Score: 1.6596436044928926
Category	Term	Count	%	PValue	Genes	List Total	Pop Hits	Pop Total	Fold Enrichment	Bonferroni	Benjamini	FDR
GOTERM_CC_FAT	GO:0000267~cell fraction	85	8.38264	0.0143097	ITGB3BP, PTGS2, HIP1R, SLC20A2, PTGS1, HEXB, ANPEP, FOXO3, ITSN1, GSR, EDNRB, WISP2, AGPAT6, DYNLL1, PTGES, RHOB, SNTB2, FNDC3A, SLC1A1, STS, F10, MAN1A2, PDE4D, MAN1A1, PFKM, PTPRN, BCL2L11, AADAC, PLCE1, CLIC4, ABAT, GNAS, CTSB, VAMP2, MAP3K12, GRB14, WNT5A, FGFR1, GAL3ST4, CAV1, CALD1, CXCL2, AKAP13, CALCOCO2, MME, COMT, ITGB1, PCSK2, TNFRSF1B, ACE, ECE1, BCHE, FUT4, PAFAH1B1, RPL7A, EHD2, DTN…	685	455	4615	1.2586	0.997814	0.233813	18.3565
GOTERM_CC_FAT	GO:0005624~membrane fraction	64	6.31164	0.0224123	ITGB3BP, PTGS2, HIP1R, SLC20A2, PTGS1, FOXO3, ITSN1, EDNRB, AGPAT6, DYNLL1, PTGES, RHOB, SNTB2, FNDC3A, SLC1A1, STS, F10, MAN1A2, MAN1A1, PTPRN, BCL2L11, AADAC, PLCE1, ABAT, GNAS, VAMP2, GRB14, MAP3K12, FGFR1, GAL3ST4, CAV1, CALD1, AKAP13, MME, COMT, ITGB1, ACE, TNFRSF1B, ECE1, BCHE, FUT4, PAFAH1B1, RPL7A, EHD2, DTNA, TMEM59L, P4HB, SLC12A2, GPR137B, ATP1A1, NPR3, ITPR1, CYP4B1, LAMP1, LAMP2, ABC…	685	335	4615	1.28711	0.999935	0.330618	27.309
GOTERM_CC_FAT	GO:0005626~insoluble fraction	66	6.50888	0.0327303	ITGB3BP, PTGS2, HIP1R, SLC20A2, PTGS1, FOXO3, ITSN1, EDNRB, AGPAT6, DYNLL1, PTGES, RHOB, SNTB2, FNDC3A, SLC1A1, STS, F10, MAN1A2, PDE4D, MAN1A1, PTPRN, BCL2L11, AADAC, PLCE1, ABAT, GNAS, VAMP2, GRB14, MAP3K12, FGFR1, GAL3ST4, CAV1, CALD1, AKAP13, MME, COMT, ITGB1, ACE, TNFRSF1B, ECE1, BCHE, FUT4, PAFAH1B1, RPL7A, EHD2, DTNA, TMEM59L, P4HB, RAB8B, SLC12A2, GPR137B, ATP1A1, NPR3, ITPR1, CYP4B1, LAM…	685	354	4615	1.25609	0.999999	0.407746	37.3907
Annotation Cluster 18	Enrichment Score: 1.6578646486551956
Category	Term	Count	%	PValue	Genes	List Total	Pop Hits	Pop Total	Fold Enrichment	Bonferroni	Benjamini	FDR
GOTERM_BP_FAT	GO:0010812~negative regulation of cell-substrate adhesion	7	0.690335	0.00128263	ARHGAP6, ACVRL1, BCL6, COL1A1, THBS1, PTEN, PIK3R1	729	10	4909	4.71372	0.979662	0.121766	2.2875
GOTERM_BP_FAT	GO:0001953~negative regulation of cell-matrix adhesion	6	0.591716	0.00530484	ARHGAP6, ACVRL1, BCL6, THBS1, PTEN, PIK3R1	729	9	4909	4.48925	1	0.2584	9.14459
GOTERM_BP_FAT	GO:0007162~negative regulation of cell adhesion	10	0.986193	0.00532344	ARHGAP6, ACVRL1, TGFBI, SIPA1, BCL6, JAK2, COL1A1, THBS1, PTEN, PIK3R1	729	24	4909	2.80578	1	0.255127	9.17521
GOTERM_BP_FAT	GO:0010810~regulation of cell-substrate adhesion	11	1.08481	0.0112042	ARHGAP6, ACVRL1, FBLN2, CSF1, CCDC80, BCL6, NID1, COL1A1, THBS1, PTEN, PIK3R1	729	31	4909	2.38944	1	0.399744	18.3846
GOTERM_BP_FAT	GO:0030155~regulation of cell adhesion	19	1.87377	0.0134036	ACVRL1, CSF1, SIPA1, CCDC80, NID1, PTEN, TPM1, SRC, TGFB2, LAMA2, ARHGAP6, FBLN2, GSN, TGFBI, JAK2, BCL6, COL1A1, THBS1, PIK3R1	729	71	4909	1.80202	1	0.429377	21.5964
GOTERM_BP_FAT	GO:0051895~negative regulation of focal adhesion formation	4	0.394477	0.0257215	ARHGAP6, ACVRL1, THBS1, PTEN	729	5	4909	5.38711	1	0.568869	37.4889
GOTERM_BP_FAT	GO:0001952~regulation of cell-matrix adhesion	7	0.690335	0.0300492	ARHGAP6, ACVRL1, CSF1, BCL6, THBS1, PTEN, PIK3R1	729	17	4909	2.77277	1	0.603855	42.3104
GOTERM_BP_FAT	GO:0051893~regulation of focal adhesion formation	4	0.394477	0.0715454	ARHGAP6, ACVRL1, THBS1, PTEN	729	7	4909	3.84793	1	0.779548	73.7744
GOTERM_BP_FAT	GO:0045785~positive regulation of cell adhesion	8	0.788955	0.255037	FBLN2, CSF1, CCDC80, NID1, THBS1, TPM1, SRC, TGFB2	729	35	4909	1.53917	1	0.967406	99.505
GOTERM_BP_FAT	GO:0010811~positive regulation of cell-substrate adhesion	5	0.493097	0.343932	FBLN2, CSF1, CCDC80, NID1, THBS1	729	20	4909	1.68347	1	0.984709	99.9499
Annotation Cluster 19	Enrichment Score: 1.6451135733045381
Category	Term	Count	%	PValue	Genes	List Total	Pop Hits	Pop Total	Fold Enrichment	Bonferroni	Benjamini	FDR
GOTERM_BP_FAT	GO:0008217~regulation of blood pressure	15	1.47929	0.000346828	ACVRL1, PTGS2, ACTA2, PTGS1, ATP1A1, NPR3, TPM1, SOD2, EDNRB, CYBA, ACE, ECE1, COL1A2, ADRA1B, ABAT	729	36	4909	2.80578	0.651042	0.0568115	0.623487
GOTERM_BP_FAT	GO:0003044~regulation of systemic arterial blood pressure mediated by a chemical signal	5	0.493097	0.0479936	ACE, ECE1, ADRA1B, TPM1, SOD2	729	10	4909	3.36694	1	0.697046	58.8019
GOTERM_BP_FAT	GO:0003073~regulation of systemic arterial blood pressure	5	0.493097	0.0888873	ACE, ECE1, ADRA1B, TPM1, SOD2	729	12	4909	2.80578	1	0.828946	81.3325
GOTERM_BP_FAT	GO:0006518~peptide metabolic process	7	0.690335	0.177586	GSR, CTH, ACE, ECE1, MME, MGST1, SOD2	729	26	4909	1.81297	1	0.934251	97.055
Annotation Cluster 20	Enrichment Score: 1.619491289761651
Category	Term	Count	%	PValue	Genes	List Total	Pop Hits	Pop Total	Fold Enrichment	Bonferroni	Benjamini	FDR
GOTERM_BP_FAT	GO:0010033~response to organic substance	68	6.70611	0.0123735	PTGS2, RBM3, PTGS1, FOXO1, MMP3, PTEN, TGFB2, B2M, HSPH1, CDKN2B, ANG, GSN, ATF6B, CREB3L2, GNG2, ANGPT1, SHC1, MYC, EGR1, STS, ZCCHC11, BAIAP2, LIFR, MGP, MFGE8, STXBP4, PTPRN, GLUL, MSX1, CAPN10, EP300, GNB2, SERPINF2, JUN, PDGFRA, ABAT, GNAS, NFE2L2, COL1A1, CAV1, IL1R1, TXN2, COL3A1, CALCOCO2, GNG11, COMT, C1S, SRF, TIMP3, SERPINH1, SRC, IRAK3, BCHE, PTK2B, COL6A2, THBS1, PIK3R1, BCKDHA, MAP1…	729	349	4909	1.31205	1	0.412702	20.1073
GOTERM_BP_FAT	GO:0009725~response to hormone stimulus	38	3.74753	0.0151237	CAV1, PTGS2, TXN2, PTGS1, FOXO1, GNG11, SRF, TIMP3, PTEN, SRC, TGFB2, BCHE, ANG, PTK2B, GNG2, SHC1, ANGPT1, THBS1, PIK3R1, BCKDHA, STS, BAIAP2, MAP1B, TGFBR2, MGP, MFGE8, STXBP4, PTPRN, PTPN11, CAPN10, EP300, GNB2, PDGFRA, TGFBR3, JAK2, GNAS, COL1A1, ABCC5	729	176	4909	1.45391	1	0.451551	24.0247
GOTERM_BP_FAT	GO:0009719~response to endogenous stimulus	41	4.04339	0.0162296	CAV1, PTGS2, TXN2, PTGS1, FOXO1, GNG11, MMP3, SRF, TIMP3, PTEN, SRC, TGFB2, BCHE, ANG, PTK2B, GNG2, ANGPT1, SHC1, THBS1, PIK3R1, BCKDHA, STS, BAIAP2, MAP1B, TGFBR2, MGP, MFGE8, STXBP4, PTPRN, PTPN11, CAPN10, EP300, GNB2, ADRA1B, PDGFRA, TGFBR3, JAK2, GNAS, COL1A1, ABCC5, MGST1	729	194	4909	1.42314	1	0.450267	25.5483
GOTERM_BP_FAT	GO:0048545~response to steroid hormone stimulus	19	1.87377	0.109542	BCKDHA, CAV1, STS, PTGS2, PTGS1, TGFBR2, MAP1B, MFGE8, PTPRN, TIMP3, PTEN, SRC, TGFB2, EP300, BCHE, PDGFRA, ANGPT1, COL1A1, THBS1	729	90	4909	1.4216	1	0.867829	87.6538
Annotation Cluster 21	Enrichment Score: 1.4720554533633834
Category	Term	Count	%	PValue	Genes	List Total	Pop Hits	Pop Total	Fold Enrichment	Bonferroni	Benjamini	FDR
GOTERM_BP_FAT	GO:0044259~multicellular organismal macromolecule metabolic process	8	0.788955	0.00515875	TRAM2, ACE, COL3A1, COL1A1, MMP3, SERPINH1, ADAMTS2, MMP2	729	16	4909	3.36694	1	0.260567	8.9037
GOTERM_BP_FAT	GO:0044236~multicellular organismal metabolic process	8	0.788955	0.0151941	TRAM2, ACE, COL3A1, COL1A1, MMP3, SERPINH1, ADAMTS2, MMP2	729	19	4909	2.83532	1	0.448848	24.1227
GOTERM_BP_FAT	GO:0032963~collagen metabolic process	7	0.690335	0.0157778	TRAM2, COL3A1, COL1A1, MMP3, SERPINH1, ADAMTS2, MMP2	729	15	4909	3.14248	1	0.45718	24.9294
GOTERM_BP_FAT	GO:0032964~collagen biosynthetic process	4	0.394477	0.0257215	TRAM2, COL3A1, COL1A1, SERPINH1	729	5	4909	5.38711	1	0.568869	37.4889
GOTERM_BP_FAT	GO:0044243~multicellular organismal catabolic process	4	0.394477	0.13706	ACE, MMP3, ADAMTS2, MMP2	729	9	4909	2.99284	1	0.906252	92.9898
GOTERM_BP_FAT	GO:0030574~collagen catabolic process	3	0.295858	0.337439	MMP3, ADAMTS2, MMP2	729	8	4909	2.52521	1	0.983587	99.9402
Annotation Cluster 22	Enrichment Score: 1.4662934828054468
Category	Term	Count	%	PValue	Genes	List Total	Pop Hits	Pop Total	Fold Enrichment	Bonferroni	Benjamini	FDR
GOTERM_BP_FAT	GO:0007044~cell-substrate junction assembly	8	0.788955	0.00515875	ARHGAP6, TNS1, ITGA5, PTK2B, TESK2, LAMC1, THY1, FN1	729	16	4909	3.36694	1	0.260567	8.9037
GOTERM_BP_FAT	GO:0034329~cell junction assembly	10	0.986193	0.0072463	TJP1, ARHGAP6, TNS1, TLN2, ITGA5, PTK2B, TESK2, LAMC1, THY1, FN1	729	25	4909	2.69355	1	0.316523	12.2893
GOTERM_BP_FAT	GO:0034330~cell junction organization	11	1.08481	0.0141907	TJP1, ARHGAP6, TNS1, TLN2, ITGA5, PTK2B, TESK2, LAMC1, THY1, TGFB2, FN1	729	32	4909	2.31477	1	0.434902	22.7167
GOTERM_BP_FAT	GO:0048041~focal adhesion formation	4	0.394477	0.175231	ARHGAP6, PTK2B, TESK2, THY1	729	10	4909	2.69355	1	0.932422	96.8992
GOTERM_BP_FAT	GO:0043547~positive regulation of GTPase activity	3	0.295858	0.501481	ARHGAP6, PTK2B, THY1	729	11	4909	1.83651	1	0.997219	99.9996
Annotation Cluster 23	Enrichment Score: 1.4365632016298244
Category	Term	Count	%	PValue	Genes	List Total	Pop Hits	Pop Total	Fold Enrichment	Bonferroni	Benjamini	FDR
GOTERM_CC_FAT	GO:0022626~cytosolic ribosome	17	1.67653	0.0025485	RPL18, RPL36, RPS6, ZCCHC17, RPS8, RPL21P28, RPS27, RPL30, RPS3A, RPL21, RPLP0, RPL8, RPL3, RPS12, RPL11, RPL7A, RPS23, RPS24	685	52	4615	2.20255	0.661927	0.0697479	3.52689
GOTERM_BP_FAT	GO:0006414~translational elongation	19	1.87377	0.00510231	RPL18, RPL35A, RPL36, RPL27, EEF2, RPS6, RPS8, RPL21P28, RPS27, RPL30, RPS3A, RPL21, RPLP0, RPL8, RPL3, RPS12, RPL11, RPL7A, RPS23, RPS24	729	65	4909	1.96837	1	0.266922	8.81048
KEGG_PATHWAY	hsa03010:Ribosome	18	1.77515	0.00567337	RPL18, RPL35A, RPL36, RPL27, RPS6, RPS8, RPL21P28, RPS27, RPL30, RPS3A, RPL21, RPLP0, RPL8, RPL3, RPS12, RPL11, RPL7A, RPS23, RPS24	323	58	2054	1.97352	0.617692	0.274221	6.69926
GOTERM_CC_FAT	GO:0022625~cytosolic large ribosomal subunit	10	0.986193	0.00720874	RPL18, RPL30, RPLP0, RPL21, RPL8, RPL3, RPL36, RPL11, RPL7A, ZCCHC17, RPL21P28	685	25	4615	2.69489	0.953802	0.142505	9.67916
GOTERM_CC_FAT	GO:0033279~ribosomal subunit	20	1.97239	0.0129614	RPL18, MRPL51, MRPS33, MRPS28, RPL36, RPS6, ZCCHC17, RPS8, RPL21P28, RPS27, RPL30, RPS3A, RPL21, RPLP0, RPL8, RPL3, RPS12, RPL11, RPL7A, RPS23, RPS24	685	76	4615	1.77295	0.996092	0.232049	16.7709
GOTERM_CC_FAT	GO:0044445~cytosolic part	20	1.97239	0.0282253	RPL18, RPL36, PFKM, RPS6, ZCCHC17, RPS8, RPL21P28, RPL30, RPS27, RPS3A, RPL21, RPLP0, RPL8, RPL3, RPS12, GUCY1B3, RPL11, RPL7A, PIK3R1, RPS23, RPS24	685	82	4615	1.64323	0.999995	0.373753	33.1603
GOTERM_CC_FAT	GO:0015934~large ribosomal subunit	11	1.08481	0.0454106	RPL18, MRPL51, RPL30, RPLP0, RPL21, RPL8, RPL3, RPL36, RPL11, RPL7A, ZCCHC17, RPL21P28	685	38	4615	1.95025	1	0.482311	48.0006
GOTERM_MF_FAT	GO:0003735~structural constituent of ribosome	21	2.07101	0.0511558	RPL18, RPL35A, MRPL51, MRPS33, RPL36, RPL27, RPS6, RPS8, RPL21P28, RPS27, RPL30, RPS3A, RPL21, RPLP0, RPL8, RPL3, MRPL49, RPS12, RPL11, RPL7A, RPS23, RPS24	706	91	4649	1.51961	1	0.83294	55.8179
GOTERM_CC_FAT	GO:0005840~ribosome	25	2.46548	0.056644	RPL18, RPL35A, MRPL51, MRPS33, MRPS28, RPL27, RPL36, RPS6, ZCCHC17, RPS8, RPL21P28, PRMT3, RPL30, RPS27, RPS6KA2, RPS3A, RPLP0, RPL21, RPL8, RPL3, MRPL49, RPS12, RPL11, RPL7A, RPS23, RPS24	685	117	4615	1.43958	1	0.507406	55.9791
GOTERM_CC_FAT	GO:0022627~cytosolic small ribosomal subunit	7	0.690335	0.154437	RPS27, RPS3A, RPS12, RPS6, RPS8, RPS23, RPS24	685	25	4615	1.88642	1	0.766599	90.5623
GOTERM_CC_FAT	GO:0015935~small ribosomal subunit	9	0.887574	0.233033	RPS27, MRPS28, MRPS33, RPS3A, RPS12, RPS6, RPS8, RPS23, RPS24	685	40	4615	1.51588	1	0.866483	97.6084
GOTERM_CC_FAT	GO:0030529~ribonucleoprotein complex	43	4.24063	0.380153	RPL18, MRPS33, PRPF4B, RPL36, STAU1, RPL21P28, PNN, PRMT3, RPL30, RPS27, PCBP3, RPS3A, SRRM2, RPLP0, RPL8, RPL3, RPL11, PABPC1, RPL7A, TNRC6A, RPS23, RPS24, GEMIN5, RPL35A, MRPL51, MRPS28, HNRNPA2B1, RPL27, EEF2, SSB, RPS6, NCL, ZCCHC17, RPS8, PRPF6, DDX6, HNRNPH3, RPS6KA2, RPL21, SYF2, RPS12, MRPL49, RNPC3, HNRNPH1	685	269	4615	1.07695	1	0.940584	99.8805
GOTERM_BP_FAT	GO:0006412~translation	26	2.5641	0.60298	RPL18, RPL35A, MRPL51, MRPS33, NACA, AIMP2, RBM3, EIF5B, RPL27, RPL36, EEF2, RPS6, RPS8, RPL21P28, RPL30, RPS27, RPS3A, RPLP0, RPL21, RPL8, RPL3, MRPL49, RPS12, RPL11, RPL7A, RPS23, RPS24	729	174	4909	1.00621	1	0.999245	100
Annotation Cluster 24	Enrichment Score: 1.4212022392765096
Category	Term	Count	%	PValue	Genes	List Total	Pop Hits	Pop Total	Fold Enrichment	Bonferroni	Benjamini	FDR
GOTERM_MF_FAT	GO:0051766~inositol trisphosphate kinase activity	4	0.394477	0.0123238	ITPKB, ITPKC, IPMK, IP6K2	706	4	4649	6.58499	0.999983	0.543773	17.5434
GOTERM_MF_FAT	GO:0008440~inositol trisphosphate 3-kinase activity	4	0.394477	0.0123238	ITPKB, ITPKC, IPMK, IP6K2	706	4	4649	6.58499	0.999983	0.543773	17.5434
GOTERM_MF_FAT	GO:0004428~inositol or phosphatidylinositol kinase activity	4	0.394477	0.358844	ITPKB, ITPKC, IPMK, IP6K2	706	14	4649	1.88142	1	0.994757	99.9007

## Sheet: group2_latedownreg
Annotation Cluster 1	Enrichment Score: 15.778990659738735
Category	Term	Count	%	PValue	Genes	List Total	Pop Hits	Pop Total	Fold Enrichment	Bonferroni	Benjamini	FDR
GOTERM_CC_FAT	GO:0031981~nuclear lumen	428	15.2748	1.26412e-28	XRCC5, TGOLN2, MEF2C, MEF2B, XRCC6, SYNCRIP, MED24, MED23, ZNF638, INTS3, MED22, MED21, SART3, MED20, ZNF251, CTNNB1, INTS9, INTS8, INTS7, INTS6, GIT2, OGT, LUC7L3, TBPL1, KRR1, MCRS1, PTBP1, SKP1, ISG20L2, TOX4, MAPK1, PPP1CA, RPS19, MED15, PTRF, RCC2, MED16, MED17, JUN, MAPK3, RPS15, ZNF384, FLII, MYBBP1A, MYO18A, RAD23B, SDAD1, LEO1, NAT10, TCF4, TCF3, PRPF40A, DHX9, RPS9, ATM, FXR1, RPS7, NOL…	1880	718	4615	1.4633	8.96259e-26	8.96259e-26	1.90963e-25
GOTERM_CC_FAT	GO:0005654~nucleoplasm	263	9.38615	8.89073e-20	MEF2C, XRCC5, MEF2B, XRCC6, MED24, SYNCRIP, MED23, ZNF638, MED22, INTS3, MED21, SART3, MED20, CTNNB1, INTS9, INTS8, SIN3A, INTS7, INTS6, U2AF1, GIT2, H2AFX, OGT, LUC7L3, TBPL1, NUDT16, MCRS1, ANAPC5, RAN, YY1, PTBP1, ANAPC4, SKP1, MAPK1, PPP1CA, RFC4, MED15, PTRF, PIAS3, MED16, MED17, JUN, MAPK3, RPS15, PIAS2, RAD23B, TADA3, ELL, TAF9B, TADA1, LEO1, TCF4, TCF3, PRPF40A, SRP54, SUB1, TP53BP1, CREB…	1880	427	4615	1.51196	6.30353e-17	3.15176e-17	1.34307e-16
GOTERM_CC_FAT	GO:0044451~nucleoplasm part	166	5.92434	6.30406e-14	MEF2C, MORF4L1, MEF2B, STK38, LMO4, XRCC6, RBM4, MED24, MED23, ZNF638, MED22, INTS3, CNOT7, MED21, SART3, MED20, CBX5, CTNNB1, PNN, INTS9, INTS8, KDM1A, SIN3A, CSNK2A1, INTS7, INTS6, U2AF1, SRRM1, OGT, RNF34, LUC7L3, TBPL1, YY1, MAGOH, RELA, MTA2, HDAC10, PPP1CB, PPP1CA, HIF1A, SMARCE1, MED15, PIAS3, MED16, JUN, MED17, SLU7, PIAS2, EP400, TADA3, ELL, TAF9B, TADA1, TRRAP, ATF1, CXXC1, DDX46, NPM1,…	1880	262	4615	1.55532	4.471e-11	8.94196e-12	9.52571e-11
GOTERM_CC_FAT	GO:0070013~intracellular organelle lumen	473	16.8808	9.8286e-14	XRCC5, TGOLN2, MEF2C, MEF2B, XRCC6, SYNCRIP, MED24, MED23, ZNF638, INTS3, MED22, MED21, SART3, MED20, ZNF251, CTNNB1, INTS9, INTS8, INTS7, INTS6, GIT2, OGT, LUC7L3, TBPL1, KRR1, MCRS1, PTBP1, SKP1, ISG20L2, TOX4, MAPK1, PPP1CA, RPS19, MED15, PTRF, RCC2, MED16, MED17, JUN, RPS15, MAPK3, ZNF384, FLII, MYBBP1A, MYO18A, RAD23B, SDAD1, SERPINH1, DTD1, LEO1, NAT10, TCF4, TCF3, PRPF40A, DHX9, FOXRED2, G…	1880	916	4615	1.26759	6.96626e-11	1.16105e-11	1.48426e-10
GOTERM_CC_FAT	GO:0043233~organelle lumen	480	17.1306	2.26352e-13	XRCC5, TGOLN2, MEF2C, MEF2B, XRCC6, SYNCRIP, MED24, MED23, ZNF638, INTS3, MED22, MED21, SART3, MED20, ZNF251, CTNNB1, INTS9, INTS8, APP, INTS7, INTS6, GIT2, OGT, LUC7L3, TBPL1, KRR1, MCRS1, PTBP1, SKP1, ISG20L2, TOX4, MAPK1, PPP1CA, RPS19, MED15, PTRF, RCC2, MED16, MED17, JUN, RPS15, MAPK3, ZNF384, FLII, MYBBP1A, MYO18A, RAD23B, SDAD1, SERPINH1, DTD1, LEO1, NAT10, TCF4, TCF3, PRPF40A, DHX9, FOXRE…	1880	935	4615	1.26021	1.605e-10	2.29285e-11	3.41971e-10
GOTERM_CC_FAT	GO:0005730~nucleolus	212	7.56602	2.4067e-13	TGOLN2, S100A4, CCT2, ZNF251, G2E3, SIN3A, INTS6, OXR1, NUDT16, KRR1, MCRS1, PTBP1, ISG20L2, TOX4, MAPK1, RPS19, RCC2, HUWE1, RARS, MAPK3, ZNF384, FLII, MYBBP1A, MYO18A, FUS, SDAD1, VRK1, NOM1, STX17, NAT10, UTP23, DHX9, SRP54, UAP1, SUB1, RPS9, HNRNPA1, RPF2, RPF1, FXR1, RPS7, CCT5, NUP62, NOLC1, POP1, UTP14A, UTP20, RBPJ, ADAR, CCNT2, BACH1, COPS2, GAR1, TSG101, ZMAT3, GNL3L, RTN3, ZNF146, BRD4…	1880	357	4615	1.45774	1.70654e-10	2.13317e-11	3.63609e-10
GOTERM_CC_FAT	GO:0031974~membrane-enclosed lumen	484	17.2734	9.29016e-13	XRCC5, TGOLN2, MEF2C, MEF2B, XRCC6, SYNCRIP, MED24, MED23, ZNF638, INTS3, MED22, MED21, SART3, MED20, ZNF251, CTNNB1, INTS9, INTS8, APP, INTS7, INTS6, GIT2, OGT, LUC7L3, TBPL1, KRR1, MCRS1, OPA1, PTBP1, SKP1, ISG20L2, TOX4, MAPK1, PPP1CA, RPS19, MED15, PTRF, RCC2, MED16, MED17, JUN, RPS15, MAPK3, ZNF384, FLII, MYBBP1A, MYO18A, RAD23B, SDAD1, SERPINH1, DTD1, LEO1, NAT10, TCF4, TCF3, PRPF40A, DHX9,…	1880	950	4615	1.25065	6.58686e-10	7.31872e-11	1.40343e-09
Annotation Cluster 2	Enrichment Score: 10.193717756492063
Category	Term	Count	%	PValue	Genes	List Total	Pop Hits	Pop Total	Fold Enrichment	Bonferroni	Benjamini	FDR
GOTERM_CC_FAT	GO:0043232~intracellular non-membrane-bounded organelle	576	20.5567	1.24517e-14	XRCC5, RPL18, TGOLN2, HIST2H2AA3, HIST2H2AA4, RPL19, XRCC6, RPL15, RANGAP1, RPL22L1, ZNF251, CITED2, CTNNB1, APP, HIST1H2BK, INCENP, HIST1H2BI, INTS6, RPL10, RPL12, STAG2, KRR1, MCRS1, ROCK1, PTBP1, VPS41, ISG20L2, TOX4, CTNNA1, PCM1, MAPK1, NME2, RPS18, RPS19, RPS16, RCC2, NME1, JUN, RPS15, MAPK3, ZNF384, FLII, RPS10, MYBBP1A, MYO18A, EIF2AK4, SDAD1, RPL13AP5, PEA15, RPS26, PFN1, NPHP3, CDC42EP2…	1880	1140	4615	1.24031	8.81606e-12	2.93865e-12	1.8785e-11
GOTERM_CC_FAT	GO:0043228~non-membrane-bounded organelle	576	20.5567	1.24517e-14	XRCC5, RPL18, TGOLN2, HIST2H2AA3, HIST2H2AA4, RPL19, XRCC6, RPL15, RANGAP1, RPL22L1, ZNF251, CITED2, CTNNB1, APP, HIST1H2BK, INCENP, HIST1H2BI, INTS6, RPL10, RPL12, STAG2, KRR1, MCRS1, ROCK1, PTBP1, VPS41, ISG20L2, TOX4, CTNNA1, PCM1, MAPK1, NME2, RPS18, RPS19, RPS16, RCC2, NME1, JUN, RPS15, MAPK3, ZNF384, FLII, RPS10, MYBBP1A, MYO18A, EIF2AK4, SDAD1, RPL13AP5, PEA15, RPS26, PFN1, NPHP3, CDC42EP2…	1880	1140	4615	1.24031	8.81606e-12	2.93865e-12	1.8785e-11
GOTERM_CC_FAT	GO:0005856~cytoskeleton	259	9.2434	0.00169197	VAPA, DYNC2LI1, UTRN, PDLIM2, CCT3, CTNNB1, KIF13A, APP, HOMER3, IFT20, KIFAP3, INCENP, INTS6, DYNC2H1, STAG2, DBNL, ROCK1, TANC1, VPS41, CTNNA1, PCM1, DCTN3, DCTN1, FARP1, MAPK1, NME2, RCC2, CEP350, NME1, MAPK3, CC2D2A, FLII, PDE4DIP, BIN3, ADD3, MYO18A, ADD1, ALDOA, LMNB2, DAG1, CEP164, MYO9B, CAPZB, MYO9A, PFN1, NPHP3, PEA15, CDC42EP2, PFN2, MACF1, CEP170, SKA2, TNKS, EMD, DHX9, KIF3B, KIF3A, …	1880	554	4615	1.14764	0.698992	0.0346961	2.52567
Annotation Cluster 3	Enrichment Score: 8.497844726991236
Category	Term	Count	%	PValue	Genes	List Total	Pop Hits	Pop Total	Fold Enrichment	Bonferroni	Benjamini	FDR
GOTERM_BP_FAT	GO:0006396~RNA processing	175	6.24554	9.10056e-16	RALY, NCBP1, RNMT, PRPF4B, RBM3, U2AF2, LSM7, RBM4, SNRPD1, RBM6, SNRPD2, SYNCRIP, ZNF638, INTS3, SART3, SETX, PNN, NONO, INTS9, INTS8, APP, CDKN2A, DDX23, TARDBP, INTS7, INTS6, U2AF1, RBMS2, LSM4, SRRM1, LSM3, PTBP2, LSM1, LUC7L3, RBMS1, KRR1, SNRPN, MAGOH, AARS, HNRNPA2B1, PTBP1, HNRNPR, HNRNPU, RPS19, TRMT11, RPS16, RPS15, SLU7, TFB1M, SNRPE, SNRPG, FUS, FIP1L1, PABPC4, DUSP11, ZFC3H1, HNRNPL,…	2037	267	4909	1.57953	3.67617e-12	3.67617e-12	1.65423e-12
SP_PIR_KEYWORDS	mrna processing	92	3.28337	3.26301e-11	RALY, NCBP1, PRPF4B, RNMT, CRNKL1, U2AF2, RBM4, LSM7, SNRPD1, SYNCRIP, SNRPD2, WBP4, YBX1, PNN, NONO, DDX23, TARDBP, U2AF1, SRRM1, MAGOHB, LSM4, LSM3, PTBP2, LSM1, TSEN15, LUC7L3, ZCCHC8, TFIP11, SRPK2, SYMPK, PRPF31, MAGOH, PTBP1, HNRNPA2B1, SF1, PRPF3, CDC5L, HNRNPR, HNRNPU, EIF4A3, PAPD4, SNRNP200, THOC6, CPSF6, SLU7, THOC2, SNRPE, CPSF1, SNRPG, KIAA1429, PRPF38A, FIP1L1, TRA2B, TRA2A, WBP11, …	2621	131	6373	1.70763	2.18296e-08	2.72869e-09	4.89098e-08
SP_PIR_KEYWORDS	mrna splicing	81	2.89079	1.1617e-10	RALY, NCBP1, PRPF4B, CRNKL1, U2AF2, RBM4, LSM7, SNRPD1, SYNCRIP, SNRPD2, WBP4, YBX1, PNN, NONO, DDX23, TARDBP, U2AF1, SRRM1, LSM4, MAGOHB, LSM3, PTBP2, LSM1, LUC7L3, ZCCHC8, TFIP11, SRPK2, PRPF31, MAGOH, PTBP1, HNRNPA2B1, SF1, PRPF3, CDC5L, HNRNPR, HNRNPU, EIF4A3, SNRNP200, THOC6, SLU7, THOC2, SNRPE, KIAA1429, PRPF38A, SNRPG, TRA2B, TRA2A, WBP11, SF3B4, SF3B3, SF3B2, PRPF19, SF3B1, HNRNPM, HNRNPK…	2621	113	6373	1.74294	7.7718e-08	8.63533e-09	1.7413e-07
GOTERM_BP_FAT	GO:0008380~RNA splicing	100	3.56888	1.18137e-10	RALY, NCBP1, PRPF4B, CRNKL1, U2AF2, LSM7, RBM4, SNRPD1, SYNCRIP, SNRPD2, ZNF638, WBP4, YBX1, PNN, NONO, DDX23, TARDBP, PCBP1, PCBP2, U2AF1, LSM4, MAGOHB, SRRM1, LSM3, PTBP2, LSM1, LUC7L3, ZCCHC8, TFIP11, PRPF31, SRPK2, SNRPN, MAGOH, PTBP1, HNRNPA2B1, SF1, PRPF3, CDC5L, HNRNPR, HNRNPU, EIF4A3, SNRNP200, SLU7, THOC2, SNRPE, CPSF1, PRPF38A, KIAA1429, SNRPG, POLR2H, FUS, POLR2L, TRA2B, TRA2A, WBP11, …	2037	147	4909	1.6394	4.88969e-07	1.6299e-07	2.20348e-07
GOTERM_BP_FAT	GO:0006397~mRNA processing	106	3.78301	3.31843e-10	RALY, NCBP1, PRPF4B, RNMT, U2AF2, LSM7, RBM4, SNRPD1, SNRPD2, SYNCRIP, PNN, NONO, APP, DDX23, TARDBP, U2AF1, SRRM1, LSM4, LSM3, PTBP2, LSM1, LUC7L3, MAGOH, HNRNPA2B1, PTBP1, HNRNPR, HNRNPU, SLU7, SNRPE, SNRPG, FUS, FIP1L1, HNRNPL, HNRNPM, DDX46, HNRNPK, HNRNPF, HNRNPD, SNRNP35, PABPC1, PRPF40A, DHX9, CSTF3, YTHDC1, SNW1, CASC3, HNRNPA1, RBMX, PPIH, HNRNPH3, GTF2F1, HNRNPH1, ADAR, CRNKL1, MLH1, WB…	2037	160	4909	1.59657	1.3735e-06	2.28917e-07	6.18951e-07
GOTERM_CC_FAT	GO:0005681~spliceosome	56	1.99857	3.50512e-09	RALY, PRPF4B, CRNKL1, U2AF2, SNRPD1, SYNCRIP, SNRPD2, WBP4, PNN, DDX23, U2AF1, SRRM1, LSM3, API5, ZCCHC8, TFIP11, PRPF31, SNRPN, MAGOH, HNRNPA2B1, SF1, PRPF3, CDC5L, HNRNPR, HNRNPU, EIF4A3, SNRNP200, SLU7, SNRPE, PRPF38A, SNRPG, SF3B4, SF3B3, SF3B2, PRPF19, HNRNPM, SF3B1, HNRNPK, HNRNPF, DHX15, WAC, PABPC1, SNRNP35, PPWD1, RBM22, BCAS2, SNW1, RBMX, HNRNPA1, SF3A3, PPIH, SYF2, PHF5A, HNRNPH1, CWC2…	1880	74	4615	1.85768	2.48513e-06	2.48513e-07	5.29498e-06
GOTERM_BP_FAT	GO:0016071~mRNA metabolic process	112	3.99714	1.38877e-08	RALY, NCBP1, PRPF4B, RNMT, U2AF2, LSM7, RBM4, SNRPD1, SNRPD2, SYNCRIP, PNN, DCPS, NONO, APP, DDX23, TARDBP, U2AF1, SRRM1, LSM4, LSM3, PTBP2, LSM1, LUC7L3, MAGOH, HNRNPA2B1, PTBP1, HNRNPR, HNRNPU, VEGFA, SLU7, SNRPE, SNRPG, FUS, FIP1L1, HNRNPL, HNRNPM, DDX46, HNRNPK, HNRNPF, HNRNPD, SNRNP35, PABPC1, PRPF40A, DHX9, CSTF3, PAIP1, YTHDC1, SSB, SNW1, CASC3, HNRNPA1, RBMX, PPIH, HNRNPH3, GTF2F1, HNRNPH…	2037	179	4909	1.50788	5.74795e-05	8.21157e-06	2.59032e-05
KEGG_PATHWAY	hsa03040:Spliceosome	53	1.89151	2.07434e-08	NCBP1, CRNKL1, U2AF2, LSM7, SNRPD1, SNRPD2, BUD31, CTNNBL1, DDX23, PCBP1, U2AF1, LSM4, MAGOHB, LSM3, ACIN1, PRPF31, MAGOH, PRPF3, CDC5L, HNRNPU, EIF4A3, SNRNP200, SLU7, THOC2, SNRPE, PRPF38A, SNRPG, TRA2B, TRA2A, WBP11, SF3B4, SF3B3, SF3B2, PRPF19, HNRNPM, SF3B1, DDX46, HNRNPK, TCERG1, DHX15, RBM25, HSPA8, PRPF40A, RBM22, BCAS2, SNW1, RBMX, HNRNPA1, SF3A3, PPIH, SYF2, PHF5A, TXNL4A	826	72	2054	1.83047	3.83752e-06	3.83752e-06	2.56675e-05
SP_PIR_KEYWORDS	Spliceosome	51	1.82013	2.2785e-08	RALY, PRPF4B, CRNKL1, U2AF2, SNRPD1, SYNCRIP, SNRPD2, WBP4, PNN, DDX23, U2AF1, SRRM1, LSM3, ZCCHC8, TFIP11, PRPF31, MAGOH, HNRNPA2B1, SF1, PRPF3, CDC5L, HNRNPR, HNRNPU, EIF4A3, SNRNP200, SLU7, SNRPE, PRPF38A, SNRPG, SF3B4, SF3B3, SF3B2, PRPF19, HNRNPM, SF3B1, HNRNPK, HNRNPF, PABPC1, SNRNP35, PPWD1, RBM22, BCAS2, SNW1, RBMX, HNRNPA1, SF3A3, PPIH, SYF2, PHF5A, HNRNPH1, CWC22	2621	67	6373	1.85085	1.52431e-05	1.38574e-06	3.41528e-05
GOTERM_BP_FAT	GO:0000398~nuclear mRNA splicing, via spliceosome	57	2.03426	6.98715e-06	NCBP1, CRNKL1, U2AF2, LSM7, SNRPD1, SNRPD2, YBX1, DDX23, PCBP1, PCBP2, U2AF1, SRRM1, SRPK2, PRPF31, MAGOH, PTBP1, HNRNPA2B1, SF1, PRPF3, HNRNPR, HNRNPU, SNRNP200, SLU7, SNRPE, CPSF1, SNRPG, POLR2H, FUS, POLR2L, TRA2B, TRA2A, SF3B4, SF3B3, SF3B2, POLR2A, HNRNPL, HNRNPM, SF3B1, HNRNPK, CD2BP2, HNRNPF, HNRNPD, RBM25, DHX9, CSTF3, YTHDC1, SNW1, RBMX, HNRNPA1, SF3A3, PHAX, HNRNPH3, HNRNPUL1, GTF2F1, P…	2037	86	4909	1.59727	0.0285057	0.00137619	0.0130316
GOTERM_BP_FAT	GO:0000375~RNA splicing, via transesterification reactions	57	2.03426	6.98715e-06	NCBP1, CRNKL1, U2AF2, LSM7, SNRPD1, SNRPD2, YBX1, DDX23, PCBP1, PCBP2, U2AF1, SRRM1, SRPK2, PRPF31, MAGOH, PTBP1, HNRNPA2B1, SF1, PRPF3, HNRNPR, HNRNPU, SNRNP200, SLU7, SNRPE, CPSF1, SNRPG, POLR2H, FUS, POLR2L, TRA2B, TRA2A, SF3B4, SF3B3, SF3B2, POLR2A, HNRNPL, HNRNPM, SF3B1, HNRNPK, CD2BP2, HNRNPF, HNRNPD, RBM25, DHX9, CSTF3, YTHDC1, SNW1, RBMX, HNRNPA1, SF3A3, PHAX, HNRNPH3, HNRNPUL1, GTF2F1, P…	2037	86	4909	1.59727	0.0285057	0.00137619	0.0130316
GOTERM_BP_FAT	GO:0000377~RNA splicing, via transesterification reactions with bulged adenosine as nucleophile	57	2.03426	6.98715e-06	NCBP1, CRNKL1, U2AF2, LSM7, SNRPD1, SNRPD2, YBX1, DDX23, PCBP1, PCBP2, U2AF1, SRRM1, SRPK2, PRPF31, MAGOH, PTBP1, HNRNPA2B1, SF1, PRPF3, HNRNPR, HNRNPU, SNRNP200, SLU7, SNRPE, CPSF1, SNRPG, POLR2H, FUS, POLR2L, TRA2B, TRA2A, SF3B4, SF3B3, SF3B2, POLR2A, HNRNPL, HNRNPM, SF3B1, HNRNPK, CD2BP2, HNRNPF, HNRNPD, RBM25, DHX9, CSTF3, YTHDC1, SNW1, RBMX, HNRNPA1, SF3A3, PHAX, HNRNPH3, HNRNPUL1, GTF2F1, P…	2037	86	4909	1.59727	0.0285057	0.00137619	0.0130316
Annotation Cluster 4	Enrichment Score: 6.781832089713641
Category	Term	Count	%	PValue	Genes	List Total	Pop Hits	Pop Total	Fold Enrichment	Bonferroni	Benjamini	FDR
SP_PIR_KEYWORDS	protein transport	154	5.49607	1.05358e-13	SEC31A, AP4E1, CHMP4B, CHMP5, XPO4, CHMP6, VPS52, RAB1B, EIF5A, VPS53, VPS33A, KIF13A, AAGAB, VPS4B, RABGEF1, NUP37, STAM, VPS13B, ATG9A, RAN, GOLT1B, VPS45, RINT1, VPS41, YIF1A, SEC61B, ARRB2, USO1, RAB13, ERC1, VPS26A, NUP43, SEC61G, MVP, CHMP2A, ARFGAP1, COPZ2, SNX9, RAB7A, SDAD1, SNX6, NAPG, SNX5, STAM2, SNX8, MTX2, SNX7, CCDC91, ARF6, ARF5, LMAN1, TRAM2, STX18, TNKS, TRAM1, SEC61A1, AP2M1, R…	2621	237	6373	1.57997	7.0486e-11	1.40972e-11	1.57929e-10
GOTERM_BP_FAT	GO:0008104~protein localization	235	8.38687	1.16629e-10	SEC31A, LTBP2, CHMP5, CHMP6, VPS52, VPS53, RAB1B, VPS33A, CTNNB1, KIF13A, TRAK2, VPS13C, HOMER3, KIFAP3, AAGAB, VPS4B, DYNC2H1, NUP37, STAM, TLK1, VPS13B, RAN, VPS45, RINT1, VPS41, YIF1A, MAPK1, JUN, BIN3, RAB13, NUP43, SDAD1, MTX2, CCDC91, ARF6, PPT1, ARF5, CALR, RAB40B, TRAM2, MACF1, STX18, STX17, TNKS, TRAM1, SRP54, CBLB, NUP62, ARF4, PCNA, HGS, NUTF2, PDIA3, RAB5C, TSG101, AP1AR, ZMAT3, VPS37…	2037	415	4909	1.36465	4.82728e-07	2.41364e-07	2.17536e-07
GOTERM_BP_FAT	GO:0015031~protein transport	212	7.56602	1.38243e-10	SEC31A, LTBP2, CHMP5, CHMP6, VPS52, VPS53, RAB1B, VPS33A, KIF13A, TRAK2, HOMER3, AAGAB, VPS4B, NUP37, STAM, TLK1, VPS13B, RAN, VPS45, RINT1, VPS41, YIF1A, MAPK1, JUN, RAB13, NUP43, SDAD1, MTX2, CCDC91, ARF6, PPT1, ARF5, CALR, RAB40B, TRAM2, MACF1, STX18, STX17, TNKS, TRAM1, SRP54, CBLB, NUP62, ARF4, PCNA, HGS, NUTF2, PDIA3, RAB5C, TSG101, AP1AR, ZMAT3, VPS37B, AP3S1, MITD1, PDIA4, COPB2, AP1S1, A…	2037	368	4909	1.38832	5.72189e-07	1.43047e-07	2.5785e-07
GOTERM_BP_FAT	GO:0045184~establishment of protein localization	212	7.56602	1.94352e-10	SEC31A, LTBP2, CHMP5, CHMP6, VPS52, VPS53, RAB1B, VPS33A, KIF13A, TRAK2, HOMER3, AAGAB, VPS4B, NUP37, STAM, TLK1, VPS13B, RAN, VPS45, RINT1, VPS41, YIF1A, MAPK1, JUN, RAB13, NUP43, SDAD1, MTX2, CCDC91, ARF6, PPT1, ARF5, CALR, RAB40B, TRAM2, MACF1, STX18, STX17, TNKS, TRAM1, SRP54, CBLB, NUP62, ARF4, PCNA, HGS, NUTF2, PDIA3, RAB5C, TSG101, AP1AR, ZMAT3, VPS37B, AP3S1, MITD1, PDIA4, COPB2, AP1S1, A…	2037	369	4909	1.38456	8.04423e-07	1.60885e-07	3.62504e-07
GOTERM_BP_FAT	GO:0046907~intracellular transport	181	6.45967	1.12289e-06	NCBP1, SRP14, TSPO, NRBP1, SEC31A, LTBP2, AP4E1, CHMP5, EIF5A, AIP, TAPBP, APP, TRAK2, HOMER3, VPS4B, STAM, TLK1, OPA1, RAN, VPS45, PICK1, FUT10, VPS41, ERGIC2, MAPK1, NPC1, NDEL1, SEC61B, JUN, RPS15, USO1, ZNF384, ERC1, TRAPPC1, MYBBP1A, VPS26A, SEC61G, COPZ2, ARFGAP1, MYL6, SNX9, BBS4, SNX6, NAPG, STAM2, MTX2, DSCR3, GIPC1, CTSA, MYO9B, CALR, LMAN1, MACF1, STX18, STX17, BLOC1S1, NPM1, TRAM1, SE…	2037	333	4909	1.30989	0.00463685	0.000290435	0.00209438
GOTERM_BP_FAT	GO:0070727~cellular macromolecule localization	115	4.10421	5.13595e-05	SRP14, TSPO, LTBP2, AP4E1, EIF5A, AIP, CTNNB1, TRAK2, HOMER3, TLK1, STAM, RAN, VPS45, PICK1, FUT10, VPS41, TNKS2, MAPK1, SEC61B, JUN, USO1, SEC61G, COPZ2, SNX9, BBS4, SNX6, NAPG, STAM2, MTX2, CTSA, GIPC1, CALR, MACF1, STX18, STX17, NPM1, TNKS, TRAM1, SEC61A1, AP2M1, SRP54, CASC3, PPIH, CBLB, PRICKLE1, TOMM70A, NEDD4, PTTG1IP, PCNA, HGS, SEC13, NUTF2, COPA, NPEPL1, SEC24A, PDIA3, AP3S1, CLTC, CDC4…	2037	208	4909	1.33241	0.191506	0.00784251	0.0957519
GOTERM_BP_FAT	GO:0034613~cellular protein localization	113	4.03283	9.38903e-05	SRP14, TSPO, LTBP2, AP4E1, EIF5A, AIP, CTNNB1, TRAK2, HOMER3, TLK1, STAM, RAN, VPS45, PICK1, FUT10, VPS41, TNKS2, MAPK1, SEC61B, JUN, USO1, SEC61G, COPZ2, SNX9, BBS4, SNX6, NAPG, STAM2, MTX2, CTSA, GIPC1, CALR, MACF1, STX18, STX17, NPM1, TNKS, TRAM1, SEC61A1, AP2M1, SRP54, PPIH, CBLB, PRICKLE1, TOMM70A, NEDD4, PTTG1IP, PCNA, HGS, SEC13, NUTF2, COPA, NPEPL1, SEC24A, PDIA3, AP3S1, CLTC, CDC42, COPB…	2037	206	4909	1.32194	0.322015	0.0124582	0.174978
GOTERM_BP_FAT	GO:0006886~intracellular protein transport	104	3.71163	0.000120336	SRP14, TSPO, LTBP2, AP4E1, EIF5A, AIP, TRAK2, HOMER3, TLK1, STAM, RAN, VPS45, PICK1, FUT10, VPS41, MAPK1, SEC61B, JUN, USO1, SEC61G, COPZ2, SNX9, SNX6, NAPG, MTX2, STAM2, CTSA, GIPC1, CALR, MACF1, STX18, STX17, NPM1, TRAM1, SEC61A1, AP2M1, SRP54, PPIH, CBLB, PRICKLE1, TOMM70A, NEDD4, PTTG1IP, PCNA, HGS, SEC13, NUTF2, COPA, NPEPL1, SEC24A, PDIA3, AP3S1, CLTC, COPB2, AP2B1, AP1S1, COPB1, ZFYVE16, V…	2037	188	4909	1.33315	0.392315	0.0149806	0.224211
SP_PIR_KEYWORDS	transport	275	9.81442	0.427394	SLC9A9, SLC36A1, SEC31A, CHMP5, CHMP6, PITPNB, VPS52, VPS53, RAB1B, SLC35A2, VPS33A, SLC35A3, KIF13A, GOT2, ATP2B1, ATP2B4, TRAK2, AAGAB, VPS4B, NUP37, STAM, VPS13B, TXNL1, SLC12A9, FAM21C, RAN, VPS45, RINT1, VPS41, YIF1A, ERGIC2, GLTP, TTPAL, RAB13, TRAPPC1, NUP43, SLC2A10, SDAD1, CLCN3, MTX2, SFXN3, CCDC91, ARF6, ARF5, SLC11A2, ATP6V0C, PEA15, TRAM2, STX18, STX17, TNKS, SNRNP35, TRAM1, LAPTM4B,…	2621	660	6373	1.01313	1	0.951808	99.9765
Annotation Cluster 5	Enrichment Score: 5.92922947544231
Category	Term	Count	%	PValue	Genes	List Total	Pop Hits	Pop Total	Fold Enrichment	Bonferroni	Benjamini	FDR
GOTERM_BP_FAT	GO:0042254~ribosome biogenesis	47	1.67737	2.62684e-08	SDAD1, GAR1, UTP6, ERI1, GNL3L, WBP11, FCF1, BMS1, DCAF13, EBNA1BP2, SBDS, UTP11L, CDKN2A, NPM1, NPM3, RPL5, RPL7A, RSL24D1, FTSJ1, FTSJ3, RPS24, UTP23, KRR1, PDCD11, EXOSC8, EXOSC9, TSR1, NIP7, MPHOSPH10, RPL26, HEATR1, EXOSC1, ISG20L2, RPF1, FBL, RPS7, DIS3, EIF4A3, RPS19, NOLC1, RPS16, TSC1, RPS15, NOP58, TFB1M, UTP14A, NHP2	2037	60	4909	1.88777	0.000108719	1.20805e-05	4.89956e-05
GOTERM_BP_FAT	GO:0022613~ribonucleoprotein complex biogenesis	65	2.31977	3.64758e-08	NCBP1, CRNKL1, GAR1, SNRPD1, SNRPD2, GNL3L, DCAF13, EBNA1BP2, SBDS, CDKN2A, DDX23, FTSJ1, FTSJ3, SRPK2, PRPF31, KRR1, EXOSC8, EXOSC9, NIP7, SF1, EXOSC1, ISG20L2, EIF4A3, RPS19, PIH1D1, RPS16, SNRNP200, RPS15, SLU7, ZNHIT6, TFB1M, SNRPE, NHP2, SNRPG, SDAD1, UTP6, NUFIP1, ERI1, WBP11, FCF1, BMS1, UTP11L, NPM1, NPM3, RPL5, RPL7A, RSL24D1, RPS24, UTP23, PDCD11, TSR1, MPHOSPH10, RPL26, HEATR1, RPF1, F…	2037	92	4909	1.70266	0.000150962	1.50972e-05	6.80343e-05
GOTERM_BP_FAT	GO:0034660~ncRNA metabolic process	69	2.46253	3.333e-07	NARS, GAR1, ZNFX1, INTS3, INTS9, DCAF13, INTS8, SBDS, CDKN2A, INTS7, INTS6, FTSJ1, TPR, TSEN15, FTSJ3, KRR1, EXOSC8, CARS, YARS, EXOSC9, DARS, SARS, AARS, EXOSC1, TARS, EIF4A3, RPS19, RPS16, TRMT11, RARS, RPS15, HARS, TFB1M, NHP2, EIF2AK4, HSD3B7, UTP6, TYW3, ERI1, WBP11, VARS, FCF1, DTD1, IARS, UTP11L, ADAT3, THG1L, NPM3, RPL5, RPS24, MARS, UTP23, PDCD11, AIMP1, GARS, MPHOSPH10, RPL26, EPRS, SSB…	2037	103	4909	1.61441	0.00137858	0.000106112	0.000621666
GOTERM_BP_FAT	GO:0006364~rRNA processing	36	1.2848	1.75883e-06	GAR1, UTP6, ERI1, WBP11, FCF1, DCAF13, UTP11L, SBDS, CDKN2A, NPM3, RPL5, FTSJ1, FTSJ3, RPS24, UTP23, KRR1, PDCD11, EXOSC8, EXOSC9, RPL26, MPHOSPH10, HEATR1, EXOSC1, FBL, RPF1, RPS7, DIS3, EIF4A3, RPS19, NOLC1, RPS16, RPS15, NOP58, TFB1M, UTP14A, NHP2	2037	46	4909	1.88602	0.00725337	0.000404352	0.0032805
GOTERM_BP_FAT	GO:0016072~rRNA metabolic process	36	1.2848	4.15188e-06	GAR1, UTP6, ERI1, WBP11, FCF1, DCAF13, UTP11L, SBDS, CDKN2A, NPM3, RPL5, FTSJ1, FTSJ3, RPS24, UTP23, KRR1, PDCD11, EXOSC8, EXOSC9, RPL26, MPHOSPH10, HEATR1, EXOSC1, FBL, RPF1, RPS7, DIS3, EIF4A3, RPS19, NOLC1, RPS16, RPS15, NOP58, TFB1M, UTP14A, NHP2	2037	47	4909	1.84589	0.0170379	0.000858865	0.00774377
GOTERM_BP_FAT	GO:0034470~ncRNA processing	54	1.92719	1.69348e-05	GAR1, INTS3, INTS9, INTS8, DCAF13, SBDS, CDKN2A, INTS7, INTS6, FTSJ1, FTSJ3, TSEN15, KRR1, EXOSC8, EXOSC9, SARS, AARS, EXOSC1, EIF4A3, RPS19, TRMT11, RPS16, RPS15, TFB1M, NHP2, UTP6, TYW3, ERI1, WBP11, FCF1, SRRT, UTP11L, ADAT3, THG1L, NPM3, RPL5, RPS24, UTP23, PDCD11, MPHOSPH10, RPL26, SMAD3, SSB, HEATR1, SMAD1, RPF1, FBL, RPS7, DIS3, NOLC1, POP1, WDR4, NOP58, UTP14A	2037	82	4909	1.58702	0.0676935	0.00279982	0.0315819
SP_PIR_KEYWORDS	rrna processing	24	0.856531	7.92266e-05	UTP23, KRR1, EXOSC8, PDCD11, EXOSC9, GAR1, UTP6, MPHOSPH10, ERI1, WBP11, HEATR1, EXOSC1, FCF1, FBL, RPF1, DIS3, EIF4A3, DCAF13, UTP11L, CDKN2A, TFB1M, FTSJ1, NHP2, FTSJ3	2621	30	6373	1.94521	0.0516245	0.00203657	0.118688
Annotation Cluster 6	Enrichment Score: 5.801755506401936
Category	Term	Count	%	PValue	Genes	List Total	Pop Hits	Pop Total	Fold Enrichment	Bonferroni	Benjamini	FDR
GOTERM_MF_FAT	GO:0003677~DNA binding	404	14.4183	9.60351e-09	MEF2C, XRCC5, MEF2B, HIST2H2AA3, MEF2A, HIST2H2AA4, XRCC6, ZNF638, ZNF251, CTNNB1, CITED2, APP, HIST1H2BK, HIST1H2BI, PHTF2, LUC7L3, TBPL1, ZNF644, ZNF791, LHFP, TOX4, ZNF37A, RAD1, NME2, NME1, JUN, RPS15, ZNF384, ZZZ3, MYBBP1A, MYO18A, RAD23B, TCF4, TCF3, NAT14, ZNF528, DHX9, ZNF529, KLF13, ZNF121, ZNF621, KLF16, ATM, USF2, PCNA, H3F3A, H3F3B, PARP4, BACH1, TAF1B, ELF1, ZNF292, TSG101, ZNFX1, TA…	1942	793	4649	1.2196	1.35025e-05	6.75125e-06	1.58317e-05
SP_PIR_KEYWORDS	Transcription	370	13.2049	1.89201e-08	MEF2C, MEF2B, MEF2A, HIRA, MED24, MED23, MED22, MED21, MED20, ZNF251, CITED2, CTNNB1, NONO, EPC2, SIN3A, PHTF2, CREB3L2, RARA, TWIST1, ZNF644, YY1, ZNF791, ZNF503, ZNF37A, NME2, MED15, PTRF, PRDM4, BAZ1B, PIAS3, ASCC3, MED16, NME1, MED17, JUN, ZNF384, MNT, ZZZ3, FLII, PRDM2, PIAS2, VGLL3, VGLL4, MYBBP1A, SUPT6H, TADA3, GPBP1L1, ELL, TAF9B, TADA1, PLAGL1, TCF20, DRAP1, HEXIM1, PBRM1, LEO1, TCF4, T…	2621	728	6373	1.2358	1.26575e-05	1.26575e-06	2.83597e-05
GOTERM_BP_FAT	GO:0006350~transcription	380	13.5617	2.22278e-08	MEF2C, MEF2B, MEF2A, HIRA, MED24, MED23, MED22, MED21, MED20, ZNF251, CITED2, CTNNB1, NONO, EPC2, SIN3A, PHTF2, CREB3L2, RARA, TBPL1, TWIST1, ZNF644, YY1, ZNF791, ZNF503, ZNF37A, NME2, MED15, PTRF, PRDM4, BAZ1B, PIAS3, ASCC3, MED16, NME1, MED17, JUN, ZNF384, MNT, ZZZ3, FLII, PRDM2, PIAS2, VGLL3, VGLL4, MYBBP1A, SUPT6H, TADA3, GPBP1L1, ELL, TAF9B, TADA1, PLAGL1, TCF20, DRAP1, HEXIM1, PBRM1, LEO1, …	2037	748	4909	1.22429	9.19967e-05	1.15001e-05	4.14591e-05
SP_PIR_KEYWORDS	transcription regulation	360	12.848	2.36779e-08	MEF2C, MEF2B, MEF2A, HIRA, MED24, MED23, MED22, MED21, MED20, ZNF251, CTNNB1, CITED2, NONO, EPC2, SIN3A, PHTF2, CREB3L2, RARA, TWIST1, ZNF644, YY1, ZNF791, ZNF503, ZNF37A, NME2, MED15, PTRF, PRDM4, BAZ1B, PIAS3, ASCC3, MED16, NME1, MED17, JUN, ZNF384, MNT, ZZZ3, FLII, PRDM2, PIAS2, VGLL3, VGLL4, MYBBP1A, SUPT6H, TADA3, GPBP1L1, ELL, TAF9B, TADA1, PLAGL1, TCF20, DRAP1, HEXIM1, PBRM1, LEO1, TCF4, T…	2621	707	6373	1.23811	1.58404e-05	1.32004e-06	3.54912e-05
GOTERM_BP_FAT	GO:0045449~regulation of transcription	452	16.1313	5.71312e-07	MEF2C, MEF2B, MEF2A, XRCC6, MED24, MED23, MED22, MED21, MED20, ZNF251, CTNNB1, CITED2, MAGED1, EPC2, APP, PHTF2, YEATS2, TBPL1, ZNF644, ZNF791, ZNF503, ZNF37A, MAPK1, NME2, MED15, PTRF, MED16, ASCC3, NME1, MED17, JUN, ZNF384, ZZZ3, FLII, VGLL3, VGLL4, MYBBP1A, PFN1, HEXIM1, LEO1, TCF4, TCF3, NAT14, ZNF528, DVL3, ZNF529, KLF13, TGFBR1, ZNF121, ZNF621, KLF16, USF2, UBA3, BACH1, TAF1B, ELF1, ZNF292,…	2037	927	4909	1.17506	0.00236187	0.00016889	0.0010656
GOTERM_BP_FAT	GO:0051252~regulation of RNA metabolic process	320	11.4204	1.1179e-06	MEF2C, MEF2B, MEF2A, XRCC6, SNIP1, HIRA, MED24, SYNCRIP, MED23, MED22, MED21, MED20, ZNF251, CTNNB1, CITED2, MAGED1, APP, SIN3A, TRAK2, CREB3L2, YEATS2, RARA, TBPL1, TWIST1, RAN, YY1, ZNF791, ZNF37A, NME2, MED15, MED16, NME1, MED17, JUN, VEGFA, MNT, PRDM2, PIAS2, MYBBP1A, SUPT6H, TADA3, TAF9B, CALR, PLAGL1, RPS26, PFN1, TCF20, DRAP1, HEXIM1, PABPC1, TCF4, TCF3, TCF25, DVL3, ZNF528, AEBP2, DHX9, Z…	2037	635	4909	1.21445	0.00461629	0.000308418	0.00208507
GOTERM_BP_FAT	GO:0006355~regulation of transcription, DNA-dependent	308	10.9921	3.83353e-06	MEF2C, MEF2B, MEF2A, XRCC6, SNIP1, HIRA, MED24, MED23, MED22, MED21, MED20, ZNF251, CTNNB1, CITED2, MAGED1, APP, SIN3A, TRAK2, CREB3L2, YEATS2, RARA, TBPL1, TWIST1, RAN, YY1, ZNF791, ZNF37A, NME2, MED15, MED16, NME1, MED17, JUN, VEGFA, MNT, PRDM2, PIAS2, MYBBP1A, SUPT6H, TADA3, TAF9B, CALR, PLAGL1, PFN1, TCF20, DRAP1, HEXIM1, TCF4, TCF3, TCF25, DVL3, ZNF528, AEBP2, ZNF529, SUB1, KLF13, TP53BP1, C…	2037	615	4909	1.20692	0.0157418	0.000834758	0.00715003
SP_PIR_KEYWORDS	dna-binding	295	10.5282	1.77692e-05	XRCC5, MEF2C, HMGN1, MEF2B, HIST2H2AA3, MEF2A, HIST2H2AA4, XRCC6, ZNF638, HMGN4, ZNF251, NONO, HIST1H2BK, H2AFV, HIST1H2BI, PHTF2, CREB3L2, H2AFZ, H2AFX, RARA, LUC7L3, TBPL1, TWIST1, POLK, ZNF644, YY1, ZNF791, TOX4, ZNF37A, CHRAC1, NME2, HUWE1, PRDM4, NME1, JUN, ZNF384, MNT, ZZZ3, PRDM2, PIAS2, FUS, GPBP1L1, BANF1, PLAGL1, TCF20, DRAP1, PBRM1, TCF4, TCF3, TCF25, NAT14, ZNF528, AEBP2, DHX9, ZNF529…	2621	598	6373	1.19949	0.0118173	0.000594208	0.0266312
GOTERM_MF_FAT	GO:0030528~transcription regulator activity	300	10.7066	9.81086e-05	MEF2C, HMGN1, MEF2B, MEF2A, XRCC6, HIRA, MED24, MED23, MED22, MED21, MED20, CTNNB1, CITED2, MAGED1, SIN3A, CREB3L2, RARA, TBPL1, TWIST1, RAN, YY1, ZNF37A, DCAF6, NME2, MED15, PTRF, PRDM4, BAZ1B, MED16, NME1, MED17, JUN, ZNF384, MNT, PRDM2, PIAS2, VGLL3, SUPT6H, TADA3, ELL, TAF9B, TADA1, CALR, TCF20, DRAP1, HEXIM1, NMRAL1, TCF4, TCF3, TCF25, NAT14, AEBP2, SUB1, KLF13, TP53BP1, CREBBP, SMAD5, SRA1,…	1942	613	4649	1.17158	0.128856	0.0170956	0.161612
GOTERM_MF_FAT	GO:0003700~transcription factor activity	157	5.60314	0.235289	MEF2C, MEF2B, MEF2A, JDP2, LMO4, HIRA, CNOT7, CITED2, CTNNB1, HOXC6, KDM1A, HOXC8, HOXC9, CDKN2A, HOXC4, TARDBP, ATF6B, HOXC5, CREB3L2, RARA, ZNF449, RELA, MTA2, YY1, GABPA, MTA3, FOXN2, ZNF37A, NME2, HIF1A, BAZ1B, NME1, JUN, MNT, MGA, NFE2L1, PRDM2, NFE2L2, SUPT6H, CNBP, TADA3, SRF, MEIS1, ATF1, NR2C2, ARNT, DRAP1, TCF4, RUNX1, TCF25, RUNX2, TCF3, EWSR1, TFDP1, TAF6, CREBBP, SMAD5, KLF16, TEAD1,…	1942	357	4649	1.05279	1	0.983422	98.7993
Annotation Cluster 7	Enrichment Score: 5.1138490572218975
Category	Term	Count	%	PValue	Genes	List Total	Pop Hits	Pop Total	Fold Enrichment	Bonferroni	Benjamini	FDR
GOTERM_MF_FAT	GO:0003713~transcription coactivator activity	77	2.74804	4.25353e-07	HTATIP2, TSG101, RBM4, MED24, MED23, ZEB1, MED21, CTNNB1, CITED2, AIP, MAGED1, MAX, GTF2A1, GTF2A2, RARA, MKL2, YAP1, USP16, MKL1, TBPL1, SERTAD2, CUTA, BCL10, SP100, RAN, YY1, GABPA, RB1, ARID1B, CDK7, HMGA1, JMY, NRIP1, MED4, DCAF6, NCOA2, TAF12, SMARCE1, NCOA3, MED16, MED17, TRIM32, MNT, PIAS2, CARM1, SMARCA2, RNF20, SUPT3H, TADA3, PML, HCFC1, TADA1, TRRAP, NR2C2, ARNT, TCF20, TCERG1, NPM1, AP…	1942	118	4649	1.56214	0.000597868	0.000199329	0.000701205
GOTERM_MF_FAT	GO:0008134~transcription factor binding	152	5.4247	2.28797e-06	LMO4, RBM4, HIRA, MED24, MED23, MED21, AIP, CITED2, CTNNB1, MAGED1, HOXC6, KDM1A, SIN3A, CDKN2A, MDFIC, SND1, RARA, DDAH2, TBPL1, CUTA, BCL10, RAN, RELA, YY1, GABPA, ARID1B, STK4, DCAF6, HIF1A, SMARCE1, MED16, PIAS3, JUN, MED17, TRIM32, MNT, NFE2L1, PIAS2, MYBBP1A, SMARCA2, RNF20, ADD1, SMARCA4, TADA3, TAF9B, TADA1, TRRAP, SRF, NR2C2, ARNT, TCF20, TCERG1, DRAP1, NPM1, TCF4, RUNX1, TCF3, TFDP1, AE…	1942	273	4649	1.33288	0.00321172	0.000803899	0.00377172
GOTERM_MF_FAT	GO:0016563~transcription activator activity	118	4.21128	4.48137e-06	RBM4, XRCC6, MED24, MED23, CNOT7, MED21, AIP, CITED2, CTNNB1, MAGED1, HOXC9, RBCK1, RARA, TBPL1, CUTA, BCL10, RAN, MTA2, YY1, GABPA, ARID1B, DCAF6, SMARCE1, MED16, MED17, TRIM32, SMARCA5, MNT, ZNF384, PIAS2, NFE2L2, SMARCA2, RNF20, SMARCA4, TADA3, UBE2V1, TADA1, TRRAP, NR2C2, CXXC1, ARNT, TCF20, TCERG1, NPM1, HNRNPD, RUNX1, TCF3, RUNX2, NAT14, TFDP1, TRIP4, SUB1, TP53BP1, CREBBP, MAML2, SRA1, SMA…	1942	205	4649	1.37797	0.00628101	0.00125937	0.00738741
GOTERM_MF_FAT	GO:0003712~transcription cofactor activity	108	3.85439	6.3014e-05	RBM4, HIRA, MED24, MED23, MED21, CITED2, AIP, CTNNB1, HOXC6, MAGED1, SIN3A, SND1, RARA, TBPL1, CUTA, BCL10, RAN, YY1, GABPA, ARID1B, DCAF6, SMARCE1, MED16, MED17, TRIM32, MNT, NFE2L1, PIAS2, RNF20, SMARCA2, TADA3, TAF9B, TADA1, TRRAP, NR2C2, ARNT, TCF20, TCERG1, DRAP1, NPM1, TCF4, TFDP1, AEBP2, TRIP4, SUB1, MAML2, SRA1, CREBBP, UBP1, ATF6, HDAC5, ATF5, PSMC5, RNF4, PSMC3, SMARCC1, GTF2F1, SMARCC2…	1942	193	4649	1.33961	0.0847888	0.0125774	0.10383
GOTERM_MF_FAT	GO:0030528~transcription regulator activity	300	10.7066	9.81086e-05	MEF2C, HMGN1, MEF2B, MEF2A, XRCC6, HIRA, MED24, MED23, MED22, MED21, MED20, CTNNB1, CITED2, MAGED1, SIN3A, CREB3L2, RARA, TBPL1, TWIST1, RAN, YY1, ZNF37A, DCAF6, NME2, MED15, PTRF, PRDM4, BAZ1B, MED16, NME1, MED17, JUN, ZNF384, MNT, PRDM2, PIAS2, VGLL3, SUPT6H, TADA3, ELL, TAF9B, TADA1, CALR, TCF20, DRAP1, HEXIM1, NMRAL1, TCF4, TCF3, TCF25, NAT14, AEBP2, SUB1, KLF13, TP53BP1, CREBBP, SMAD5, SRA1,…	1942	613	4649	1.17158	0.128856	0.0170956	0.161612
Annotation Cluster 8	Enrichment Score: 4.972251510753702
Category	Term	Count	%	PValue	Genes	List Total	Pop Hits	Pop Total	Fold Enrichment	Bonferroni	Benjamini	FDR
SP_PIR_KEYWORDS	rna-binding	163	5.81727	2.69012e-12	RALY, SRP14, RNMT, RBM3, U2AF2, LSM7, RBM4, EIF5A, RBM6, SYNCRIP, RBM7, ZNF638, SART3, CNOT6, NONO, DDX18, TIA1, EIF1AX, RAVER1, TARDBP, U2AF1, RBMS2, LSM4, SRRM1, LSM3, DDX21, RPL12, PTBP2, PUM2, LSM1, RBM12, RBMS1, NUDT16, KRR1, YARS, RRP7A, SNRPN, MAGOH, AARS, HNRNPA2B1, PTBP1, HNRNPR, HNRNPU, RPS18, PTRF, TIAL1, EIF2AK2, SNRPE, XRN1, SNRPG, FUS, HDLBP, FIP1L1, PABPC4, DUSP11, HNRNPL, HNRNPM, …	2621	261	6373	1.51853	1.79966e-09	2.99943e-10	4.03219e-09
INTERPRO	IPR012677:Nucleotide-binding, alpha-beta plait	66	2.35546	1.08789e-06	RALY, ENOX2, U2AF2, RBM3, RBM4, SYNCRIP, RBM6, RBM7, SART3, NONO, TARDBP, TIA1, RAVER1, U2AF1, RBMS2, ACIN1, PTBP2, RBM12, RBMS1, RBM42, RBM41, NOL8, PTBP1, RBM45, G3BP1, HNRNPA2B1, G3BP2, SPEN, NCL, HNRNPR, TRNAU1AP, LARP7, TIAL1, RBMX2, CPSF6, MATR3, ENOX1, FUS, RBM34, TRA2B, PABPC4, TRA2A, SF3B4, HNRNPL, HNRNPM, EIF3G, HNRNPF, HNRNPD, PPIL4, PABPC1, SNRNP35, RBM27, EWSR1, RBM25, RBM26, RPS24, …	2407	100	5842	1.60188	0.00296338	0.00296338	0.00193819
INTERPRO	IPR000504:RNA recognition motif, RNP-1	66	2.35546	4.97074e-06	RALY, ENOX2, U2AF2, RBM3, RBM4, SYNCRIP, RBM6, RBM7, ZNF638, SART3, NONO, TARDBP, TIA1, RAVER1, U2AF1, RBMS2, ACIN1, PTBP2, RBM12, RBMS1, RBM42, RBM41, RRP7A, NOL8, PTBP1, RBM45, G3BP1, HNRNPA2B1, G3BP2, SPEN, NCL, HNRNPR, TRNAU1AP, LARP7, TIAL1, RBMX2, CPSF6, MATR3, ENOX1, FUS, RBM34, TRA2B, PABPC4, TRA2A, SF3B4, HNRNPL, HNRNPM, EIF3G, HNRNPF, HNRNPD, PPIL4, PABPC1, SNRNP35, RBM27, EWSR1, RBM25,…	2407	103	5842	1.55522	0.0134687	0.00675717	0.00885555
SMART	SM00360:RRM	66	2.35546	3.79521e-05	RALY, ENOX2, U2AF2, RBM3, RBM4, SYNCRIP, RBM6, RBM7, ZNF638, SART3, NONO, TARDBP, TIA1, RAVER1, U2AF1, RBMS2, ACIN1, PTBP2, RBM12, RBMS1, RBM42, RBM41, RRP7A, NOL8, PTBP1, RBM45, G3BP1, HNRNPA2B1, G3BP2, SPEN, NCL, HNRNPR, TRNAU1AP, LARP7, TIAL1, RBMX2, CPSF6, MATR3, ENOX1, FUS, RBM34, TRA2B, PABPC4, TRA2A, SF3B4, HNRNPL, HNRNPM, EIF3G, HNRNPF, HNRNPD, PPIL4, PABPC1, SNRNP35, RBM27, EWSR1, RBM25,…	1365	103	3133	1.47074	0.0151412	0.0151412	0.0529612
UP_SEQ_FEATURE	domain:RRM 2	35	1.24911	5.60519e-05	RBM34, U2AF2, PABPC4, RBM4, SYNCRIP, ZNF638, SART3, SF3B4, HNRNPL, NONO, HNRNPM, TIA1, TARDBP, RAVER1, HNRNPF, HNRNPD, RBMS2, PTBP2, PABPC1, RBM12, RBMS1, RBM26, PTBP1, RBM45, HNRNPA2B1, SPEN, HNRNPR, HNRNPA1, NCL, HNRNPH3, TRNAU1AP, TIAL1, SFPQ, CPNE1, HNRNPH1, MATR3	2621	49	6370	1.73598	0.280986	0.152053	0.108444
UP_SEQ_FEATURE	domain:RRM 1	35	1.24911	5.60519e-05	RBM34, U2AF2, PABPC4, RBM4, SYNCRIP, ZNF638, SART3, SF3B4, HNRNPL, NONO, HNRNPM, TIA1, TARDBP, RAVER1, HNRNPF, HNRNPD, RBMS2, PTBP2, PABPC1, RBM12, RBMS1, RBM26, PTBP1, RBM45, HNRNPA2B1, SPEN, HNRNPR, HNRNPA1, NCL, HNRNPH3, TRNAU1AP, TIAL1, SFPQ, CPNE1, HNRNPH1, MATR3	2621	49	6370	1.73598	0.280986	0.152053	0.108444
UP_SEQ_FEATURE	domain:RRM 3	18	0.642398	0.0030946	U2AF2, PTBP1, RBM45, PABPC4, SYNCRIP, SPEN, NCL, HNRNPR, HNRNPL, HNRNPM, TIA1, RAVER1, HNRNPF, TIAL1, CPNE1, PABPC1, PTBP2, HNRNPH1, RBM12	2621	24	6370	1.82278	1	0.781287	5.82309
UP_SEQ_FEATURE	domain:RRM	30	1.07066	0.031059	RALY, FUS, ENOX2, TRA2B, RBM3, TRA2A, RBM6, RBM7, DNAJC17, EIF3G, U2AF1, PPIL4, SNRNP35, RBM27, EWSR1, RBM25, RBM22, RBM42, RBM41, RRP7A, NOL8, G3BP1, G3BP2, SSB, RBMX, LARP7, POLDIP3, RBMX2, CPSF6, ENOX1	2621	53	6370	1.37568	1	0.985302	45.7054
Annotation Cluster 9	Enrichment Score: 3.63113223843562
Category	Term	Count	%	PValue	Genes	List Total	Pop Hits	Pop Total	Fold Enrichment	Bonferroni	Benjamini	FDR
SP_PIR_KEYWORDS	protein biosynthesis	81	2.89079	2.68278e-11	RPL18, METAP2, RPL19, NARS, EIF5, HBS1L, EIF5B, EIF5A, RPS2, RPS3, EIF3CL, RPS3A, EIF1AX, RPL10, EIF1, RPL12, RPS27A, CARS, YARS, MRPL3, DARS, SARS, AARS, EEF2, EIF1B, EIF4G1, TARS, EIF4G2, EIF4A3, RPS18, EIF4G3, TRNAU1AP, RPS19, RPS16, DHX29, RARS, EIF2S2, RPS15, EIF4A1, HARS, RPS10, EEF1D, EEF1B2, ABTB1, RPS15A, VARS, RPL13AP5, DTD1, EIF3C, IARS, RPS26, EIF3D, EIF3G, RPL32, RPS29, RPL6, RPL8, R…	2621	111	6373	1.77435	1.79478e-08	2.56397e-09	4.02126e-08
KEGG_PATHWAY	hsa03010:Ribosome	44	1.57031	1.07166e-07	RPL18, RPL19, RPL15, RPL35, RPS15A, RPL22L1, RPL39, RPS2, RPL13AP5, RPS3, RPS26, MRPL13, RPS29, RPL32, RPL6, RPS3A, RPL34, RPL8, RPL3, RPL26L1, RPL10, RPL5, RPL12, RPL7A, RPL10A, RSL24D1, RPL4, RPS21, RPS23, RPS27A, RPS24, RPSA, RPL26, RPS9, RPL23A, RPL28, RPS8, RPS7, RPS18, RPS19, RPL18A, RPS16, RPL13A, RPS15, RPS10	826	58	2054	1.88645	1.98256e-05	9.91285e-06	0.000132606
GOTERM_BP_FAT	GO:0006412~translation	106	3.78301	2.57791e-07	RPL18, RPL19, RBM3, RPL15, EIF5, HBS1L, EIF5B, EIF5A, RPL22L1, EIF3CL, EIF1AX, RPL26L1, RPL10, EIF1, RPL12, RPS27A, C12ORF65, CARS, YARS, DARS, AARS, EEF2, RPS18, RPS19, RPS16, DHX29, RARS, EIF2S2, RPS15, HARS, RPS10, PELO, EIF2AK2, EIF2AK4, EEF1B2, PABPC4, RPL13AP5, DTD1, EIF3C, RPS26, EIF3D, EIF3G, RPS29, RPL6, RPL8, RPL3, EIF3L, RPL5, EIF3I, RPL10A, RPL7A, RPL4, RPS21, RPS23, EIF3M, RPS24, EEF…	2037	174	4909	1.46811	0.00106643	8.89126e-05	0.000480829
GOTERM_CC_FAT	GO:0044445~cytosolic part	56	1.99857	1.04626e-06	RPL18, CYB5R3, RPL19, VBP1, PRDX5, CCT2, CCT3, RPS2, CTNNB1, RPS3, RPS3A, RPL10, RPS27A, CCT6A, RPS18, RPS19, RPS16, PFDN4, RPS15, RPS10, ERC1, RPL35, RPS15A, GIPC1, RPL39, TCF7L2, RPS26, AKT1S1, BLOC1S2, RPL32, RPS29, RPL6, RPL34, RPL8, BLOC1S1, RPL3, PYCARD, RPL5, RPL7A, RPL4, RPS21, RPS23, RPS24, ENO1, RPSA, RPL26, RPS9, RPL23A, RPS8, RPL28, RPS7, CCT5, UACA, RPL18A, TSC1, BAX	1880	82	4615	1.67644	0.000741522	5.70597e-05	0.00158051
GOTERM_BP_FAT	GO:0006414~translational elongation	47	1.67737	1.45892e-06	RPL18, EEF1B2, RPL19, RPL15, RPL35, RPS15A, RPL39, VARS, RPS2, RPL13AP5, RPS3, RPS26, RPS29, RPL32, RPL6, RPS3A, RPL34, RPL8, RPL3, RPL26L1, RPL10, RPL5, RPL12, RPL7A, RPL10A, RPL4, RPS21, RPS23, RPS27A, RPS24, EEF1A1, RPSA, RPL26, RPS9, EEF2, RPL23A, RPL28, RPS8, RPS7, RPS18, TRNAU1AP, RPS19, RPL18A, RPS16, RPL13A, RPS15, RPS10, EEF1D	2037	65	4909	1.74256	0.00602026	0.00035514	0.00272112
GOTERM_CC_FAT	GO:0022626~cytosolic ribosome	38	1.35617	7.76835e-06	RPL18, RPL19, RPL35, RPS15A, NUFIP1, RPL39, RPS2, RPS3, RPS26, RPS29, RPL32, RPL6, RPS3A, RPL34, RPL8, RPL3, RPL10, RPL5, RPL4, RPL7A, RPS21, RPS27A, RPS23, RPS24, RPSA, RPL26, RPS9, RPL23A, RPL28, RPS8, RPS7, RPS18, RPS19, RPL18A, RPS16, RPS15, RPS10, EIF2AK4	1880	52	4615	1.79388	0.00549264	0.000367118	0.0117345
SP_PIR_KEYWORDS	ribonucleoprotein	90	3.21199	1.2427e-05	RALY, MRPL40, RPL18, SRP14, RPL19, GAR1, LSM7, RPL15, SNRPD1, SYNCRIP, SNRPD2, RPL22L1, RPS2, RPS3, DCAF13, RPS3A, PCBP1, PCBP2, RPL26L1, RPL10, LSM4, LSM3, RPL12, LSM1, RPS27A, PRPF31, KRR1, MRPL4, MRPL3, SNRPN, HNRNPA2B1, HNRNPR, HNRNPU, LARP6, RPS18, RPS19, RPS16, RPS15, RPS10, SNRPE, NHP2, MVP, SNRPG, RPL35, RPS15A, RPL39, RPL13AP5, HNRNPL, RPS26, HNRNPM, TROVE2, MRPL13, HNRNPK, RPL32, RPS29,…	2621	153	6373	1.4303	0.00827923	0.000461765	0.0186254
SP_PIR_KEYWORDS	ribosome	34	1.21342	9.50803e-05	RPL18, RPL19, RPS15A, RPS2, RPL13AP5, RPS3, RPS26, RPS29, RPL32, RPL6, RPS3A, RPL8, RPL3, RPL10, RPL5, RPL12, RPL4, RPL7A, RPS21, RPS27A, RPS23, RPS24, RPSA, MRPL3, RPL26, RPS9, RPS8, RPS7, RPS18, RPS19, RPL18A, RPS16, RPL13A, RPS15, RPS10	2621	48	6373	1.72232	0.0616308	0.00235322	0.142423
GOTERM_CC_FAT	GO:0022627~cytosolic small ribosomal subunit	19	0.678087	0.00149778	RPSA, RPS9, RPS15A, RPS2, RPS8, RPS3, RPS7, RPS26, RPS18, RPS19, RPS29, RPS16, RPS3A, RPS15, RPS10, RPS21, RPS27A, RPS23, RPS24	1880	25	4615	1.86564	0.654487	0.0316907	2.23886
GOTERM_CC_FAT	GO:0022625~cytosolic large ribosomal subunit	17	0.606709	0.0156761	RPL18, RPL19, RPL35, RPL26, RPL23A, RPL39, RPL28, RPL32, RPL18A, RPL6, RPL34, RPL8, RPL3, RPL10, RPL5, RPL7A, RPL4	1880	25	4615	1.66926	0.999986	0.184276	21.2337
GOTERM_CC_FAT	GO:0033279~ribosomal subunit	41	1.46324	0.022762	RPL18, RPL19, RPL35, RPS15A, RPL39, RPS2, RPL13AP5, RPS3, RPS26, MRPL13, RPS29, RPL32, RPL6, RPS3A, RPL34, NPM1, RPL8, RPL3, RPL26L1, RPL10, RPL5, RPL4, RPL7A, RPS21, RPS23, RPS27A, RPS24, RPSA, MRPL3, RPL26, RPS9, RPL23A, RPL28, RPS8, RPS7, RPS18, RPS19, RPL18A, RPS16, RPL13A, RPS15, RPS10	1880	76	4615	1.32429	1	0.234801	29.3779
GOTERM_CC_FAT	GO:0005840~ribosome	58	2.06995	0.046349	RPL18, MRPL40, RPL19, RPL15, RPL22L1, RPS2, RPS3, RPS3A, RPL26L1, RPL10, RPL12, RPS27A, MRPL4, MRPL3, SF1, RPS6KC1, RPS18, RPS19, RPS16, RPS15, RPS10, EIF2AK4, RPL35, RPS15A, NUFIP1, RPL39, GCN1L1, RPL13AP5, NUFIP2, RPS26, CYLD, MRPL13, RPL32, RPS29, RPL6, MRPL17, RPL34, NPM1, RPL8, RPL3, RPL5, RPL4, RPL10A, RPL7A, RSL24D1, RPS21, APEX1, RPS23, RPS24, RPSA, RRBP1, RPL26, RPS9, RPL23A, RPS8, RPL28…	1880	117	4615	1.2169	1	0.346829	51.1742
GOTERM_CC_FAT	GO:0015934~large ribosomal subunit	22	0.785153	0.0488691	RPL18, MRPL3, RPL19, RPL35, RPL26, RPL23A, RPL39, RPL28, RPL13AP5, MRPL13, RPL32, RPL18A, RPL13A, RPL6, RPL34, NPM1, RPL8, RPL26L1, RPL3, RPL10, RPL5, RPL4, RPL7A	1880	38	4615	1.42119	1	0.358562	53.0874
GOTERM_MF_FAT	GO:0003735~structural constituent of ribosome	47	1.67737	0.0542581	RPL18, RPL19, RPL15, RPL35, RPS15A, RPL22L1, RPL39, RPS2, RPL13AP5, RPS3, RPS26, CYLD, MRPL13, RPS29, RPL32, RPL6, RPS3A, MRPL17, RPL34, RPL8, RPL3, RPL26L1, RPL10, RPL5, RPL12, RPL7A, RPL10A, RSL24D1, RPL4, RPS21, RPS23, RPS27A, RPS24, RPSA, MRPL4, MRPL3, RPL26, RPS9, RPL23A, RPL28, RPS8, RPS7, RPS18, RPS19, RPL18A, RPS16, RPL13A, RPS15	1942	91	4649	1.23642	1	0.798245	60.1338
SP_PIR_KEYWORDS	ribosomal protein	48	1.71306	0.200294	MRPL40, RPL18, RPL19, RPL15, RPL22L1, RPS2, RPS3, RPS3A, RPL26L1, RPL10, RPL12, RPS27A, MRPL4, MRPL3, RPS6KC1, RPS18, RPS19, RPS16, RPS15, RPS10, RPL35, RPS15A, RPL39, RPL13AP5, RPS26, MRPL13, RPL32, RPS29, RPL6, RPL34, MRPL17, RPL8, RPL3, RPL5, RPL4, RPL10A, RPL7A, RPS21, RPS23, RPS24, RPSA, RPL26, RPS9, RPL23A, RPL28, RPS8, RPS7, RPL18A, RPL13A	2621	103	6373	1.13313	1	0.796224	96.4924
GOTERM_CC_FAT	GO:0015935~small ribosomal subunit	20	0.713776	0.235831	RPSA, RPS15A, RPS9, RPS2, RPS8, RPS3, RPS7, RPS26, RPS18, RPS19, RPS29, RPS16, RPS3A, RPS15, NPM1, RPS10, RPS21, RPS27A, RPS23, RPS24	1880	40	4615	1.22739	1	0.787833	98.2805
GOTERM_MF_FAT	GO:0005198~structural molecule activity	106	3.78301	0.579003	RPL18, SEPT2, RPL19, VAPA, AP4E1, RPL15, RPL22L1, PNN, RPL26L1, RPL10, RPL12, GNL1, RPS27A, DCTN3, CTNNA1, ARPC1B, RPS18, RPS19, RPS16, RPS15, COL1A2, COL1A1, SEPT7, ADD3, ADD1, MYL6, CAV1, LMNB2, ARPC5, LLGL1, RPL13AP5, MYL9, RPS26, TUBB, LAMB2, ARPC3, RPS29, RPL6, ARPC2, RPL8, RPL3, RPL5, RPL10A, RPL7A, RPL4, LAMB1, RPS21, RPS23, FN1, RPS24, RPSA, EFEMP2, RPS9, RPL23A, COL16A1, RPS8, EMILIN1, R…	1942	254	4649	0.999039	1	0.99973	99.9999
Annotation Cluster 10	Enrichment Score: 3.523921546670152
Category	Term	Count	%	PValue	Genes	List Total	Pop Hits	Pop Total	Fold Enrichment	Bonferroni	Benjamini	FDR
SP_PIR_KEYWORDS	ubl conjugation pathway	119	4.24697	7.28757e-06	MKRN1, SAE1, CUL3, G2E3, CUL5, WWP2, KLHL9, RABGEF1, RBCK1, RNF34, ZC3HC1, ANAPC5, DTX3L, ANAPC4, UBE2J1, SKP2, SOCS4, UBR2, UBR1, SKP1, DCAF4, DCAF6, TRIM33, HUWE1, PIAS3, MIB2, TRIM32, ASB1, RNF139, ASB3, PIAS2, TNFAIP3, RNF20, FBXL3, RAD23B, FZR1, UBA6, UBE2V1, UBA5, NEDD8, UBAC1, RAB40B, RBX1, FBXW9, UBE2D3, UBE2D2, RNF11, RNF168, RNF167, UBE2D1, HECTD1, FBXO7, CDC23, UBE2L6, SUGT1, ATG3, CDC…	2621	211	6373	1.37133	0.00486353	0.000286747	0.0109229
GOTERM_BP_FAT	GO:0019941~modification-dependent protein catabolic process	135	4.81799	6.24276e-05	PPP2R5C, SAE1, ERLEC1, CUL3, G2E3, CUL5, WWP2, KLHL9, RABGEF1, RBCK1, RNF34, RPS27A, ZC3HC1, ANAPC5, ANAPC4, UBE2J1, SKP2, SOCS4, UBR2, UBR1, SKP1, SEC61B, HUWE1, TRIM33, PIAS3, MIB2, TRIM32, ASB1, RNF139, ASB3, PIAS2, TNFAIP3, RNF20, FBXL3, RAD23B, FZR1, UBA6, UBE2V1, UBA5, NEDD8, UBAC1, RAB40B, RBX1, FBXW9, UBE2D3, UBE2D2, RNF11, RNF168, ZMPSTE24, RNF167, UBE2D1, HECTD1, FBXO7, FOXRED2, CDC23, …	2037	251	4909	1.29617	0.227711	0.00918597	0.116375
GOTERM_BP_FAT	GO:0043632~modification-dependent macromolecule catabolic process	135	4.81799	6.24276e-05	PPP2R5C, SAE1, ERLEC1, CUL3, G2E3, CUL5, WWP2, KLHL9, RABGEF1, RBCK1, RNF34, RPS27A, ZC3HC1, ANAPC5, ANAPC4, UBE2J1, SKP2, SOCS4, UBR2, UBR1, SKP1, SEC61B, HUWE1, TRIM33, PIAS3, MIB2, TRIM32, ASB1, RNF139, ASB3, PIAS2, TNFAIP3, RNF20, FBXL3, RAD23B, FZR1, UBA6, UBE2V1, UBA5, NEDD8, UBAC1, RAB40B, RBX1, FBXW9, UBE2D3, UBE2D2, RNF11, RNF168, ZMPSTE24, RNF167, UBE2D1, HECTD1, FBXO7, FOXRED2, CDC23, …	2037	251	4909	1.29617	0.227711	0.00918597	0.116375
GOTERM_BP_FAT	GO:0051603~proteolysis involved in cellular protein catabolic process	139	4.96074	0.000112721	PPP2R5C, SAE1, ERLEC1, CUL3, G2E3, CUL5, WWP2, KLHL9, RABGEF1, RBCK1, RNF34, RPS27A, ADAM9, ZC3HC1, ANAPC5, RELA, ANAPC4, UBE2J1, SKP2, SOCS4, UBR2, UBR1, SKP1, SEC61B, HUWE1, TRIM33, PIAS3, MIB2, TRIM32, BACE1, RNF139, ASB1, ASB3, PIAS2, TNFAIP3, RNF20, FBXL3, RAD23B, FZR1, UBA6, UBE2V1, UBA5, NEDD8, UBAC1, RAB40B, RBX1, FBXW9, UBE2D3, UBE2D2, RNF11, RNF168, ZMPSTE24, RNF167, UBE2D1, HECTD1, FBX…	2037	262	4909	1.27854	0.372856	0.0144748	0.210037
GOTERM_BP_FAT	GO:0044257~cellular protein catabolic process	139	4.96074	0.000178224	PPP2R5C, SAE1, ERLEC1, CUL3, G2E3, CUL5, WWP2, KLHL9, RABGEF1, RBCK1, RNF34, RPS27A, ADAM9, ZC3HC1, ANAPC5, RELA, ANAPC4, UBE2J1, SKP2, SOCS4, UBR2, UBR1, SKP1, SEC61B, HUWE1, TRIM33, PIAS3, MIB2, TRIM32, BACE1, RNF139, ASB1, ASB3, PIAS2, TNFAIP3, RNF20, FBXL3, RAD23B, FZR1, UBA6, UBE2V1, UBA5, NEDD8, UBAC1, RAB40B, RBX1, FBXW9, UBE2D3, UBE2D2, RNF11, RNF168, ZMPSTE24, RNF167, UBE2D1, HECTD1, FBX…	2037	264	4909	1.26886	0.521804	0.0202841	0.331899
GOTERM_BP_FAT	GO:0044265~cellular macromolecule catabolic process	164	5.85296	0.000314617	NCBP1, PPP2R5C, SAE1, ERLEC1, CUL3, DCPS, G2E3, CUL5, CDKN2A, WWP2, KLHL9, RABGEF1, RBCK1, RNF34, RPS27A, ADAM9, ZC3HC1, ANAPC5, MAGOH, RELA, ANAPC4, SKP2, UBE2J1, SOCS4, UBR2, UBR1, SKP1, SEC61B, HUWE1, TRIM33, PIAS3, MIB2, TRIM32, BACE1, RNF139, ASB1, ASB3, PIAS2, TNFAIP3, RNF20, FBXL3, RAD23B, FZR1, PABPC4, UBA6, UBE2V1, NEDD8, UBA5, PPT1, UBAC1, RAB40B, RBX1, FBXW9, UBE2D3, UBE2D2, HNRNPD, RN…	2037	321	4909	1.23123	0.728123	0.0328435	0.585194
GOTERM_BP_FAT	GO:0030163~protein catabolic process	141	5.03212	0.000395072	PPP2R5C, SAE1, ERLEC1, CUL3, G2E3, CUL5, WWP2, KLHL9, RABGEF1, RBCK1, RNF34, RPS27A, ADAM9, ZC3HC1, ANAPC5, RELA, ANAPC4, UBE2J1, SKP2, SOCS4, UBR2, UBR1, SKP1, SEC61B, HUWE1, TRIM33, PIAS3, MIB2, TRIM32, BACE1, RNF139, ASB1, ASB3, PIAS2, YME1L1, TNFAIP3, RNF20, FBXL3, RAD23B, FZR1, UBA6, UBE2V1, UBA5, PPT1, NEDD8, UBAC1, RAB40B, RBX1, FBXW9, UBE2D3, UBE2D2, RNF11, RNF168, ZMPSTE24, RNF167, UBE2D…	2037	272	4909	1.24926	0.80515	0.0373212	0.734321
GOTERM_BP_FAT	GO:0006511~ubiquitin-dependent protein catabolic process	66	2.35546	0.00130981	KIAA0368, TSG101, UBE2G1, PPP2R5C, UCHL1, ERLEC1, CUL3, CUL5, PSMD1, USP11, FBXL12, USP16, RPS27A, USP14, ANAPC5, UFD1L, ANAPC4, SKP2, ERLIN2, ERLIN1, UBR2, UBE2I, UBR1, SKP1, SEC61B, UBE2K, PSME2, TRIM32, MDM2, RNF20, PSMB10, RAD23B, FZR1, USP8, USP5, NEDD8, EDEM3, CYLD, UBE2D3, UBE2D2, RNF11, USP37, USP36, UBE2D1, BUB3, FBXO7, FOXRED2, CDC23, PCNP, CDC27, PSMB8, RNF6, PSMC6, PSMD14, PSMC5, PSMD…	2037	117	4909	1.35944	0.995594	0.0850926	2.41502
GOTERM_BP_FAT	GO:0009057~macromolecule catabolic process	169	6.03141	0.00253532	NCBP1, PPP2R5C, SAE1, ERLEC1, CUL3, DCPS, G2E3, CUL5, CDKN2A, WWP2, KLHL9, RABGEF1, RBCK1, RNF34, RPS27A, ADAM9, ZC3HC1, ANAPC5, MAGOH, RELA, ANAPC4, SKP2, UBE2J1, SOCS4, UBR2, UBR1, SKP1, SEC61B, HUWE1, TRIM33, PIAS3, MIB2, TRIM32, BACE1, RNF139, ASB1, ASB3, PIAS2, YME1L1, TNFAIP3, RNF20, FBXL3, RAD23B, FZR1, PABPC4, UBA6, UBE2V1, NEDD8, UBA5, PPT1, UBAC1, RAB40B, RBX1, FBXW9, UBE2D3, UBE2D2, HN…	2037	344	4909	1.18394	0.999973	0.141248	4.62451
GOTERM_BP_FAT	GO:0006508~proteolysis	183	6.53105	0.024478	SCPEP1, THOP1, LGMN, PPP2R5C, SAE1, ERLEC1, CUL3, G2E3, CUL5, HTRA2, WWP2, HTRA1, PAPPA, KLHL9, RABGEF1, RBCK1, RNF34, RPS27A, ADAM9, ZC3HC1, CAPNS1, ANAPC5, RELA, ANAPC4, SKP2, UBE2J1, SOCS4, UBR2, UBR1, SKP1, ADAMTS7, SEC61B, HUWE1, TRIM33, PIAS3, MIB2, TRIM32, CLPP, BACE1, RNF139, ASB1, ASB3, PIAS2, YME1L1, TNFAIP3, RNF20, FBXL3, RAD23B, FZR1, AMZ2, CLU, MME, UBA6, UBE2V1, NEDD8, CTSA, UBA5, U…	2037	393	4909	1.12217	1	0.580747	37.0131
Annotation Cluster 11	Enrichment Score: 3.5133682328246225
Category	Term	Count	%	PValue	Genes	List Total	Pop Hits	Pop Total	Fold Enrichment	Bonferroni	Benjamini	FDR
SP_PIR_KEYWORDS	ubl conjugation pathway	119	4.24697	7.28757e-06	MKRN1, SAE1, CUL3, G2E3, CUL5, WWP2, KLHL9, RABGEF1, RBCK1, RNF34, ZC3HC1, ANAPC5, DTX3L, ANAPC4, UBE2J1, SKP2, SOCS4, UBR2, UBR1, SKP1, DCAF4, DCAF6, TRIM33, HUWE1, PIAS3, MIB2, TRIM32, ASB1, RNF139, ASB3, PIAS2, TNFAIP3, RNF20, FBXL3, RAD23B, FZR1, UBA6, UBE2V1, UBA5, NEDD8, UBAC1, RAB40B, RBX1, FBXW9, UBE2D3, UBE2D2, RNF11, RNF168, RNF167, UBE2D1, HECTD1, FBXO7, CDC23, UBE2L6, SUGT1, ATG3, CDC…	2621	211	6373	1.37133	0.00486353	0.000286747	0.0109229
KEGG_PATHWAY	hsa04120:Ubiquitin mediated proteolysis	46	1.64168	2.93297e-05	FZR1, UBE2Z, UBE2G1, PPIL2, PML, UBA6, SAE1, RBX1, PRPF19, CUL3, UBE2D3, CUL5, UBE2D2, WWP2, KLHL9, UBE2D1, TRIP12, ANAPC5, ANAPC4, SKP2, UBE2J1, UBE2L6, HERC4, UBE2F, CDC23, HERC3, UBE2I, SKP1, UBE2Q2, CDC27, RFWD2, UBE2E3, CBLB, HUWE1, CUL4A, UBA1, NEDD4, UBE2K, PIAS3, TRIM32, UBA3, MDM2, PIAS2, TCEB1, UBE2S, UBE2E1	826	70	2054	1.63411	0.00541137	0.0013556	0.036286
UP_SEQ_FEATURE	active site:Glycyl thioester intermediate	28	0.999286	3.72011e-05	UBE2Z, UBE2G1, UBA6, UFC1, UBA5, UBE2D3, UBE2D2, WWP2, UBE2D1, TRIP12, HECTD1, UBE2J1, UBE2L6, UBE2F, HERC4, UBE2I, HERC3, UBE2Q2, ATG3, UBE2E3, HUWE1, NEDD4, UBA1, UBE2K, UBA3, UBE2S, UBE2T, UBE2E1	2621	36	6370	1.89029	0.196624	0.196624	0.0719858
GOTERM_MF_FAT	GO:0016881~acid-amino acid ligase activity	58	2.06995	9.84217e-05	TSG101, UBE2G1, GSS, G2E3, WWP2, ANAPC5, ANAPC4, UBE2J1, HERC4, UBE2F, UBE2I, UBR2, HERC3, UBR1, HUWE1, PIAS3, UBE2K, MIB2, TRIM32, UBL4A, MDM2, PIAS2, ZNF587, RNF20, UBE2S, ZER1, FBXL3, UBE2T, UBE2Z, PPIL2, UBE2V1, ARPC4, CBLL1, GCLM, RBX1, SUMO3, PRPF19, SUMO2, UBE2D3, UBE2D2, RNF168, RNF167, UBE2D1, TRIP12, HECTD1, FBXO7, UBE2L6, CDC23, UBE2Q2, ATG3, TSPAN17, UBE2E3, RNF6, AKTIP, NEDD4, UBA3, …	1942	93	4649	1.49298	0.129239	0.0152588	0.162127
GOTERM_MF_FAT	GO:0019787~small conjugating protein ligase activity	50	1.78444	0.000125806	TSG101, UBE2G1, G2E3, WWP2, ANAPC5, ANAPC4, UBE2J1, UBE2F, UBE2I, UBR2, UBR1, HUWE1, PIAS3, UBE2K, MIB2, TRIM32, UBL4A, MDM2, PIAS2, ZNF587, RNF20, UBE2S, ZER1, FBXL3, UBE2T, UBE2Z, PPIL2, UBE2V1, CBLL1, RBX1, PRPF19, SUMO3, SUMO2, UBE2D3, UBE2D2, RNF168, RNF167, UBE2D1, TRIP12, HECTD1, FBXO7, UBE2L6, CDC23, UBE2Q2, TSPAN17, ATG3, UBE2E3, RNF6, AKTIP, NEDD4, UBE2E1	1942	78	4649	1.53457	0.162131	0.0175338	0.207192
GOTERM_BP_FAT	GO:0070647~protein modification by small protein conjugation or removal	48	1.71306	0.000381215	TSG101, UCHL1, SAE1, G2E3, WWP2, USP16, RPS27A, UBE2F, TRIM33, HUWE1, PIAS3, MIB2, TRIM32, MDM2, CAND1, ZNF587, RNF20, FBXL3, SUPT3H, PPIL2, UBE2V1, NEDD8, CDC73, TRRAP, CBLL1, RBX1, SUMO3, PRPF19, SUMO2, UBE2D3, SUMO1, UBE2D2, LEO1, RNF11, RNF168, RNF167, UBE2D1, TRIP12, MYSM1, HECTD1, PCNP, TSPAN17, ATG3, NAE1, PSMD14, NEDD4, UBA3, RNF41, UBE2E1	2037	77	4909	1.50229	0.793644	0.0368778	0.708652
GOTERM_BP_FAT	GO:0032446~protein modification by small protein conjugation	42	1.49893	0.000825777	TSG101, PPIL2, UBE2V1, CDC73, SAE1, NEDD8, CBLL1, RBX1, PRPF19, SUMO3, SUMO2, SUMO1, UBE2D3, G2E3, UBE2D2, WWP2, RNF11, LEO1, RNF168, RNF167, UBE2D1, RPS27A, TRIP12, HECTD1, UBE2F, PCNP, ATG3, TSPAN17, NAE1, HUWE1, TRIM33, NEDD4, PIAS3, MIB2, TRIM32, UBA3, MDM2, CAND1, ZNF587, RNF20, FBXL3, UBE2E1, RNF41	2037	67	4909	1.51069	0.967265	0.0592322	1.52906
SP_PIR_KEYWORDS	ligase	77	2.74804	0.0010011	MKRN1, SLC27A1, NARS, UBE2G1, UCHL1, CAD, SAE1, RNF181, GSS, G2E3, WWP2, RNF34, NFX1, RNF31, CARS, YARS, DARS, SARS, DTX3L, AARS, NADSYN1, UBE2J1, UBE2F, HERC4, HERC3, UBR2, UBE2I, UBR1, PJA2, RFWD2, TARS, TRIM33, HUWE1, UBE2K, MIB2, RARS, TRIM32, RNF139, HARS, MDM2, RNF20, UBE2S, UBE2T, ADSS, UBE2Z, UBA6, ASNS, ARPC4, CBLL1, VARS, GCLM, DTD1, IARS, UBE2D3, UBE2D2, RNF168, RNF167, UBE2D1, TRIP12,…	2621	140	6373	1.33733	0.488327	0.0189627	1.4901
GOTERM_MF_FAT	GO:0016879~ligase activity, forming carbon-nitrogen bonds	62	2.21271	0.00127048	TSG101, UBE2G1, CAD, GSS, G2E3, WWP2, ANAPC5, ANAPC4, NADSYN1, UBE2J1, HERC4, UBE2F, HERC3, UBE2I, UBR2, UBR1, HUWE1, PIAS3, UBE2K, MIB2, TRIM32, UBL4A, MDM2, PIAS2, ZNF587, RNF20, UBE2S, ZER1, FBXL3, UBE2T, ADSS, UBE2Z, PPIL2, UBE2V1, ASNS, ARPC4, CBLL1, GCLM, RBX1, SUMO3, PRPF19, SUMO2, UBE2D3, UBE2D2, RNF168, RNF167, UBE2D1, TRIP12, HECTD1, FBXO7, UBE2L6, CDC23, UBE2Q2, ATG3, TSPAN17, UBE2E3, …	1942	108	4649	1.37429	0.83261	0.112336	2.07394
GOTERM_MF_FAT	GO:0004842~ubiquitin-protein ligase activity	39	1.39186	0.00654759	UBE2Z, UBE2G1, PPIL2, CBLL1, PRPF19, UBE2D3, G2E3, UBE2D2, WWP2, RNF168, RNF167, UBE2D1, TRIP12, HECTD1, FBXO7, ANAPC5, ANAPC4, UBE2J1, UBE2L6, CDC23, UBR2, UBR1, UBE2Q2, TSPAN17, UBE2E3, RNF6, HUWE1, NEDD4, UBE2K, MIB2, TRIM32, MDM2, ZNF587, UBE2S, RNF20, FBXL3, UBE2T, ZER1, UBE2E1	1942	66	4649	1.41459	0.999903	0.308884	10.2636
GOTERM_BP_FAT	GO:0016567~protein ubiquitination	34	1.21342	0.00873283	TSG101, PPIL2, UBE2V1, CDC73, SAE1, CBLL1, PRPF19, UBE2D3, G2E3, UBE2D2, WWP2, RNF11, LEO1, RNF168, RNF167, UBE2D1, RPS27A, TRIP12, HECTD1, PCNP, TSPAN17, ATG3, TRIM33, HUWE1, NEDD4, MIB2, TRIM32, MDM2, CAND1, ZNF587, RNF20, FBXL3, UBE2E1, RNF41	2037	57	4909	1.43749	1	0.328972	15.0918
Annotation Cluster 12	Enrichment Score: 3.4204609415659792
Category	Term	Count	%	PValue	Genes	List Total	Pop Hits	Pop Total	Fold Enrichment	Bonferroni	Benjamini	FDR
UP_SEQ_FEATURE	active site:Glycyl thioester intermediate	28	0.999286	3.72011e-05	UBE2Z, UBE2G1, UBA6, UFC1, UBA5, UBE2D3, UBE2D2, WWP2, UBE2D1, TRIP12, HECTD1, UBE2J1, UBE2L6, UBE2F, HERC4, UBE2I, HERC3, UBE2Q2, ATG3, UBE2E3, HUWE1, NEDD4, UBA1, UBE2K, UBA3, UBE2S, UBE2T, UBE2E1	2621	36	6370	1.89029	0.196624	0.196624	0.0719858
GOTERM_MF_FAT	GO:0019787~small conjugating protein ligase activity	50	1.78444	0.000125806	TSG101, UBE2G1, G2E3, WWP2, ANAPC5, ANAPC4, UBE2J1, UBE2F, UBE2I, UBR2, UBR1, HUWE1, PIAS3, UBE2K, MIB2, TRIM32, UBL4A, MDM2, PIAS2, ZNF587, RNF20, UBE2S, ZER1, FBXL3, UBE2T, UBE2Z, PPIL2, UBE2V1, CBLL1, RBX1, PRPF19, SUMO3, SUMO2, UBE2D3, UBE2D2, RNF168, RNF167, UBE2D1, TRIP12, HECTD1, FBXO7, UBE2L6, CDC23, UBE2Q2, TSPAN17, ATG3, UBE2E3, RNF6, AKTIP, NEDD4, UBE2E1	1942	78	4649	1.53457	0.162131	0.0175338	0.207192
INTERPRO	IPR000608:Ubiquitin-conjugating enzyme, E2	18	0.642398	0.000627847	UBE2Z, TSG101, UBE2G1, UBE2J1, UBE2V1, UBE2L6, UBE2F, UBE2I, UBE2Q2, UBE2E3, UBE2D3, UBE2D2, AKTIP, UBE2K, UBE2D1, UBE2S, UBE2T, UBE2E1	2407	22	5842	1.9858	0.819731	0.192783	1.11269
SMART	SM00212:UBCc	18	0.642398	0.00132741	UBE2Z, TSG101, UBE2G1, UBE2J1, UBE2V1, UBE2L6, UBE2F, UBE2I, UBE2Q2, UBE2E3, UBE2D3, UBE2D2, AKTIP, UBE2K, UBE2D1, UBE2S, UBE2T, UBE2E1	1365	22	3133	1.87792	0.413729	0.124967	1.83697
INTERPRO	IPR016135:Ubiquitin-conjugating enzyme/RWD-like	20	0.713776	0.00202573	UBE2Z, TSG101, IMPACT, UBE2G1, UBE2J1, UBE2V1, UBE2L6, UBE2F, UBE2I, UBE2Q2, UBE2E3, UBE2D3, UBE2D2, AKTIP, UBE2K, UBE2D1, UBE2S, EIF2AK4, UBE2T, UBE2E1	2407	27	5842	1.79784	0.996041	0.369336	3.54824
Annotation Cluster 13	Enrichment Score: 3.224769481527716
Category	Term	Count	%	PValue	Genes	List Total	Pop Hits	Pop Total	Fold Enrichment	Bonferroni	Benjamini	FDR
GOTERM_BP_FAT	GO:0006351~transcription, DNA-dependent	83	2.96217	0.000362592	TAF1B, CCNT2, COPS2, RSF1, LMO4, MED24, NFKB1, MED23, YBX1, TMF1, FUBP1, MAX, CDKN2A, MAZ, GTF2A1, TARDBP, GTF2A2, MYC, TBPL1, NFX1, CCNK, SNAPC2, GABPA, TP53, GTF2H3, CDK7, GTF2H1, MED4, TAF12, HIF1A, PTRF, PRDM4, MED16, MED17, MNT, SMARCA5, NFE2L1, NFE2L2, LCOR, POLR2H, SUPT3H, POLR2L, ELL, TAF9B, HCFC1, NFIX, NR3C1, ARNT, POLR2A, TSC22D1, TROVE2, TCERG1, GTF3C6, NFAT5, MLLT1, NPM3, TCEA1, SUPT…	2037	148	4909	1.35151	0.777102	0.0359487	0.674144
GOTERM_BP_FAT	GO:0032774~RNA biosynthetic process	83	2.96217	0.000483744	TAF1B, CCNT2, COPS2, RSF1, LMO4, MED24, NFKB1, MED23, YBX1, TMF1, FUBP1, MAX, CDKN2A, MAZ, GTF2A1, TARDBP, GTF2A2, MYC, TBPL1, NFX1, CCNK, SNAPC2, GABPA, TP53, GTF2H3, CDK7, GTF2H1, MED4, TAF12, HIF1A, PTRF, PRDM4, MED16, MED17, MNT, SMARCA5, NFE2L1, NFE2L2, LCOR, POLR2H, SUPT3H, POLR2L, ELL, TAF9B, HCFC1, NFIX, NR3C1, ARNT, POLR2A, TSC22D1, TROVE2, TCERG1, GTF3C6, NFAT5, MLLT1, NPM3, TCEA1, SUPT…	2037	149	4909	1.34244	0.86503	0.0417156	0.898434
GOTERM_BP_FAT	GO:0006352~transcription initiation	28	0.999286	0.000758778	POLR2H, RSF1, POLR2L, TAF9B, MED24, MED23, POLR2A, MAZ, GTF2A1, GTF2A2, MYC, NAT14, TBPL1, ERCC2, TAF2, TAF6, GTF2H3, CDK7, GTF2H1, MNAT1, MED4, TAF12, PTRF, MED16, MED17, GTF2F1, THRAP3, SMARCA5	2037	40	4909	1.68694	0.956794	0.0586297	1.40583
GOTERM_BP_FAT	GO:0006366~transcription from RNA polymerase II promoter	67	2.39115	0.000947923	CCNT2, COPS2, LMO4, MED24, NFKB1, MED23, YBX1, TMF1, FUBP1, MAX, MAZ, GTF2A1, TARDBP, GTF2A2, MYC, TBPL1, NFX1, CCNK, SNAPC2, GABPA, GTF2H3, CDK7, GTF2H1, MED4, HIF1A, TAF12, PRDM4, MED16, MED17, MNT, NFE2L1, NFE2L2, LCOR, POLR2H, SUPT3H, POLR2L, ELL, HCFC1, NFIX, NR3C1, ARNT, POLR2A, TSC22D1, TCERG1, NFAT5, MLLT1, TCEA1, SUPT4H1, TRIP11, APEX1, ERCC2, TAF2, CEBPB, TRIP4, TAF6, CEBPD, KLF13, AFF4…	2037	118	4909	1.36834	0.980264	0.0654385	1.75334
Annotation Cluster 14	Enrichment Score: 3.1952153293560155
Category	Term	Count	%	PValue	Genes	List Total	Pop Hits	Pop Total	Fold Enrichment	Bonferroni	Benjamini	FDR
GOTERM_CC_FAT	GO:0005794~Golgi apparatus	209	7.45896	0.00023092	TGOLN2, SEC31A, PITPNB, VPS52, VPS53, RAB1B, SLC35A2, UXS1, SLC35A3, B2M, CUL3, ACBD3, G2E3, APP, PICALM, IFT20, DYNC2H1, BSG, ROCK1, VPS45, VPS41, TOX4, YIF1A, ERGIC2, MED15, BACE1, PDE4DIP, PRDM2, RAB13, TRAPPC1, MYO18A, EXT2, TPST1, GLG1, CLCN3, GNAI3, CCDC91, ARF6, PPT1, ARF5, PRRC1, CALU, SLC11A2, SERINC5, LPCAT1, STX18, GORASP2, GOLPH3L, ZMPSTE24, TNKS, LAPTM4A, RHBDF1, NDFIP2, ARF4, ARSB, …	1880	426	4615	1.20434	0.151039	0.00709391	0.34827
SP_PIR_KEYWORDS	golgi apparatus	144	5.13919	0.000241912	TGOLN2, AP4E1, PITPNB, VPS52, VPS53, SLC35A2, UXS1, SLC35A3, CUL3, ACBD3, PICALM, IFT20, ROCK1, GOLT1B, VPS45, FUT10, YIF1A, ERGIC2, TNKS2, CHPF, BACE1, USO1, VAMP5, VAMP4, RNF24, PDE4DIP, CLIP3, PTGFRN, ERC1, TRAPPC1, EXT2, TPST1, COPZ2, ARFGAP1, GLG1, CLCN3, CAV1, GRB2, CCDC91, ARF6, ARF5, PRRC1, LMAN1, LPCAT1, STX18, GORASP2, GOLPH3L, ZMPSTE24, TNKS, ENTPD4, SDF4, SLC30A6, SLC30A7, B4GALT1, B4…	2621	278	6373	1.25949	0.149439	0.00504532	0.361994
GOTERM_CC_FAT	GO:0044431~Golgi apparatus part	79	2.81941	0.00464765	TGOLN2, COPA, SEC31A, SEC24A, AP4E1, KIAA0368, CLSTN1, GJA1, PIP5K1A, CHPF2, CLTC, SLC35A2, SLC35A3, TAPBP, B2M, TMF1, COPB2, BLZF1, AP1S1, CHIC2, COPB1, GOPC, GOLGA1, SPG21, SEC24C, GOLGA5, SEC24D, GOLGA4, GOLGA3, SEC23A, PGAP2, ARL1, STX5, BSG, STX4, FUT10, RASIP1, VPS41, CHPF, BACE1, NUCB2, ARCN1, VAMP5, USO1, VAMP4, GNAS, WASL, CLIP3, TRAPPC1, SEC23B, COPE, GLG1, COPZ2, ARFGAP1, CAV1, FUT8, P…	1880	152	4615	1.27584	0.963222	0.0773983	6.79539
Annotation Cluster 15	Enrichment Score: 3.18818123596988
Category	Term	Count	%	PValue	Genes	List Total	Pop Hits	Pop Total	Fold Enrichment	Bonferroni	Benjamini	FDR
GOTERM_CC_FAT	GO:0005694~chromosome	115	4.10421	2.52296e-05	MORF4L1, HMGN1, XRCC5, HIST2H2AA3, HIST2H2AA4, PRPF4B, XRCC6, HIRA, CBX3, RANGAP1, HMGN4, CBX6, CBX5, CITED2, SIN3A, CSNK2A1, H2AFV, HIST1H2BK, INCENP, HIST1H2BI, H2AFZ, NUP37, H2AFX, STAG2, RAN, DCTN3, DCTN1, TNKS2, CHRAC1, RFC4, NDEL1, RCC2, BAZ1B, SMARCE1, JUN, SMARCA5, CLIP1, AKAP8, NUP43, RNF20, SEPT7, ADD3, SMARCA4, HIST1H4L, HIST1H4K, CEP164, BANF1, HIST1H4A, HIST1H4B, SMARCB1, HIST1H4E, H…	1880	209	4615	1.35072	0.017729	0.00105168	0.0381061
GOTERM_CC_FAT	GO:0044427~chromosomal part	98	3.4975	0.000106717	XRCC5, HMGN1, MORF4L1, HIST2H2AA3, HIST2H2AA4, XRCC6, HIRA, CBX3, RANGAP1, HMGN4, CBX6, CBX5, CITED2, SIN3A, CSNK2A1, HIST1H2BK, H2AFV, INCENP, HIST1H2BI, H2AFZ, NUP37, H2AFX, STAG2, RAN, DCTN3, DCTN1, TNKS2, CHRAC1, NDEL1, RFC4, BAZ1B, RCC2, JUN, CLIP1, NUP43, SEPT7, SMARCA4, HIST1H4L, HIST1H4K, HIST1H4A, HIST1H4B, HIST1H4E, PBRM1, HIST1H4F, TNKS, CLASP1, SKA2, HIST1H4C, HIST1H4D, HIST1H4I, HIST…	1880	178	4615	1.35151	0.0728744	0.00377617	0.161089
GOTERM_CC_FAT	GO:0044454~nuclear chromosome part	37	1.32049	0.000482254	XRCC5, MORF4L1, NBN, XRCC6, HIRA, MLH1, CBX3, NUFIP1, MLH3, POT1, CITED2, CBX5, CSNK2A1, SIN3A, INCENP, H2AFX, TNKS, BAZ2A, TERF1, MSH5, TRIM28, WAPAL, PPP1R10, UBE2I, SIRT7, RAD50, SMC3, TNKS2, PURA, ATRX, CHRAC1, TNKS1BP1, HDAC1, JUN, SMARCC1, H2AFY2, H3F3A, H3F3B	1880	57	4615	1.59346	0.289652	0.0130677	0.72604
GOTERM_CC_FAT	GO:0000790~nuclear chromatin	20	0.713776	0.000818987	MORF4L1, TRIM28, HIRA, CBX3, NUFIP1, PPP1R10, SIRT7, CBX5, CITED2, TNKS1BP1, ATRX, CSNK2A1, SIN3A, HDAC1, SMARCC1, JUN, H2AFY2, H3F3A, H3F3B, H2AFX, BAZ2A	1880	26	4615	1.8883	0.440605	0.0191771	1.23007
GOTERM_CC_FAT	GO:0000228~nuclear chromosome	42	1.49893	0.00711205	XRCC5, MORF4L1, NBN, XRCC6, HIRA, MLH1, CBX3, NUFIP1, MLH3, POT1, CBX5, CITED2, CSNK2A1, SIN3A, SMARCB1, INCENP, PBRM1, TNKS, H2AFX, BAZ2A, TERF1, NOL6, MSH5, TRIM28, WAPAL, PPP1R10, UBE2I, SIRT7, RAD50, SMC3, TNKS2, PURA, ATRX, CHRAC1, TNKS1BP1, HDAC1, SMARCE1, JUN, SMARCC1, H2AFY2, H3F3A, H3F3B, ADD3	1880	74	4615	1.39326	0.993657	0.106362	10.2212
GOTERM_CC_FAT	GO:0000785~chromatin	49	1.74875	0.00982249	HMGN1, MORF4L1, HIST2H2AA3, HIST4H4, HIST2H2AA4, HIRA, CBX3, HIST2H4A, HMGN4, CBX6, CBX5, CITED2, HIST2H4B, HIST2H2AB, CSNK2A1, SIN3A, H2AFV, HIST1H2BK, INCENP, HIST1H2BI, H2AFZ, H2AFX, TOP2B, STAG2, RAN, RB1, MBD2, HMGA1, BAZ1B, JUN, SMARCA4, HIST1H2AC, HIST1H4L, HIST1H4K, NUFIP1, CHD9, HIST1H4A, HIST1H4B, CHD2, HIST1H4E, HIST1H4F, HIST1H4C, HIST1H4D, HIST1H4I, BAZ2A, HIST1H4J, HIST1H4H, HIST1H3…	1880	90	4615	1.3365	0.999087	0.135673	13.8531
Annotation Cluster 16	Enrichment Score: 3.035582337428598
Category	Term	Count	%	PValue	Genes	List Total	Pop Hits	Pop Total	Fold Enrichment	Bonferroni	Benjamini	FDR
GOTERM_BP_FAT	GO:0006357~regulation of transcription from RNA polymerase II promoter	167	5.96003	0.000126338	MEF2C, JDP2, XRCC6, RBM4, HIRA, CNOT2, MED23, MED22, CNOT7, MED21, MED20, CITED2, CTNNB1, MAGED1, HOXC6, KDM1A, APP, HOXC8, SIN3A, TRAK2, HOXC5, TWIST1, RELA, MTA2, YY1, GABPA, PKIG, HDAC10, HIF1A, SMARCE1, MED15, MED16, TIAL1, JUN, MED17, VEGFA, SMARCA5, SMARCA2, SUPT6H, SMARCA4, CNBP, TADA3, TAF9B, NEDD8, CALR, SRF, ARNT, PLAGL1, PFN1, HEXIM1, DRAP1, SMARCB1, TCF4, RUNX1, RUNX2, TCF25, TCF3, TF…	2037	323	4909	1.24599	0.407227	0.015263	0.235381
GOTERM_BP_FAT	GO:0010604~positive regulation of macromolecule metabolic process	189	6.74518	0.00026499	MEF2C, NCBP1, IL6ST, XRCC6, RBM4, EIF5A, TNFSF12, CNOT7, MED21, CTNNB1, CITED2, APP, MDFIC, H2AFX, RPS27A, ADAM9, BCL10, IRS2, ANAPC5, RAN, RELA, MTA2, ANAPC4, TNFRSF14, ARID1B, SKP1, IRS1, TNKS2, MAPK1, HIF1A, PIAS3, JUN, MED17, TRIM32, VEGFA, PDGFRA, PIAS2, NFE2L2, SMARCA1, SMARCA2, RNF20, SMARCA4, CNBP, FZR1, CAV1, CALR, SRF, ARNT, PLAGL1, BLOC1S2, SMARCB1, RNF168, TNKS, UBE2D1, TCF4, RUNX1, A…	2037	375	4909	1.2146	0.666108	0.0284541	0.493102
GOTERM_BP_FAT	GO:0051254~positive regulation of RNA metabolic process	112	3.99714	0.000347541	MEF2C, NCBP1, RBM4, XRCC6, MED21, CNOT7, CITED2, CTNNB1, APP, MDFIC, BCL10, RAN, MTA2, RELA, ARID1B, HIF1A, MED17, JUN, VEGFA, PIAS2, NFE2L2, SMARCA1, SMARCA2, SMARCA4, CNBP, SRF, ARNT, PLAGL1, SMARCB1, TCF4, RUNX1, ASF1A, TCF3, RUNX2, TAF2, DVL3, KLF13, TP53BP1, MAML2, SRA1, SMAD5, CREBBP, TEAD1, SMAD3, TEAD3, SMAD1, USF2, SREBF2, ATF6, HDAC5, ATF4, RNF6, PSMC5, RNF4, HDAC1, SMARCC1, SMARCC2, EL…	2037	209	4909	1.29144	0.762769	0.0353289	0.646246
GOTERM_BP_FAT	GO:0045893~positive regulation of transcription, DNA-dependent	111	3.96146	0.00045638	MEF2C, RBM4, XRCC6, MED21, CNOT7, CITED2, CTNNB1, APP, MDFIC, BCL10, RAN, MTA2, RELA, ARID1B, HIF1A, MED17, JUN, VEGFA, PIAS2, NFE2L2, SMARCA1, SMARCA2, SMARCA4, CNBP, SRF, ARNT, PLAGL1, SMARCB1, TCF4, RUNX1, ASF1A, TCF3, RUNX2, TAF2, DVL3, KLF13, TP53BP1, MAML2, SRA1, SMAD5, CREBBP, TEAD1, SMAD3, TEAD3, SMAD1, USF2, SREBF2, ATF6, HDAC5, ATF4, RNF6, PSMC5, RNF4, HDAC1, SMARCC1, SMARCC2, ELF1, CTC…	2037	208	4909	1.28606	0.848836	0.0402416	0.847816
GOTERM_BP_FAT	GO:0045935~positive regulation of nucleobase, nucleoside, nucleotide and nucleic acid metabolic process	140	4.99643	0.000503335	MEF2C, NCBP1, RBM4, XRCC6, TNFSF12, CNOT7, MED21, CITED2, CTNNB1, APP, MDFIC, H2AFX, RPS27A, BCL10, RAN, RELA, MTA2, ARID1B, TNKS2, MAPK1, HIF1A, JUN, MED17, VEGFA, PDGFRA, PIAS2, NFE2L2, SMARCA1, SMARCA2, RNF20, SMARCA4, CNBP, CALR, SRF, ARNT, PLAGL1, BLOC1S2, SMARCB1, RNF168, TNKS, TCF4, RUNX1, ASF1A, RUNX2, TCF3, TAF2, DVL3, KLF13, TP53BP1, TGFBR1, CREBBP, SMAD5, MAML2, SRA1, TEAD1, SMAD3, TEA…	2037	271	4909	1.24498	0.875547	0.0424842	0.934657
GOTERM_BP_FAT	GO:0010557~positive regulation of macromolecule biosynthetic process	142	5.06781	0.000699799	MEF2C, RBM4, XRCC6, EIF5A, CNOT7, MED21, CITED2, CTNNB1, APP, MDFIC, RPS27A, BCL10, IRS2, RAN, RELA, MTA2, ARID1B, IRS1, TNKS2, MAPK1, HIF1A, JUN, MED17, VEGFA, PDGFRA, PIAS2, NFE2L2, SMARCA1, SMARCA2, RNF20, SMARCA4, CNBP, CALR, SRF, ARNT, PLAGL1, BLOC1S2, SMARCB1, TNKS, TCF4, RUNX1, ASF1A, RUNX2, TCF3, TAF2, DVL3, KLF13, TP53BP1, TGFBR1, CREBBP, SMAD5, MAML2, SRA1, CD276, TEAD1, SMAD3, TEAD3, S…	2037	277	4909	1.23541	0.944838	0.0552297	1.29723
GOTERM_BP_FAT	GO:0051173~positive regulation of nitrogen compound metabolic process	145	5.17488	0.000762775	MEF2C, NCBP1, RBM4, XRCC6, TNFSF12, CNOT7, MED21, CITED2, CTNNB1, APP, MDFIC, H2AFX, DDAH1, RPS27A, BCL10, RAN, RELA, MTA2, ARID1B, TNKS2, MAPK1, HIF1A, JUN, MED17, VEGFA, PDGFRA, PIAS2, NFE2L2, SMARCA1, SMARCA2, RNF20, SMARCA4, CNBP, CALR, SRF, ARNT, PLAGL1, BLOC1S2, SMARCB1, RNF168, TNKS, TCF4, RUNX1, ASF1A, RUNX2, TCF3, TAF2, DVL3, KLF13, TP53BP1, TGFBR1, CREBBP, SMAD5, MAML2, SRA1, TEAD1, SMA…	2037	284	4909	1.23042	0.957503	0.0578504	1.41318
GOTERM_BP_FAT	GO:0045941~positive regulation of transcription	127	4.53248	0.000799429	MEF2C, RBM4, XRCC6, CNOT7, MED21, CITED2, CTNNB1, APP, MDFIC, RPS27A, BCL10, RAN, RELA, MTA2, ARID1B, MAPK1, HIF1A, JUN, MED17, VEGFA, PIAS2, NFE2L2, SMARCA1, SMARCA2, RNF20, SMARCA4, CNBP, SRF, ARNT, PLAGL1, BLOC1S2, SMARCB1, TCF4, RUNX1, ASF1A, RUNX2, TCF3, TAF2, DVL3, KLF13, TP53BP1, TGFBR1, CREBBP, SMAD5, MAML2, SRA1, TEAD1, SMAD3, TEAD3, SMAD1, USF2, SREBF2, HDAC5, ATF6, RNF6, ATF4, PSMC5, R…	2037	245	4909	1.24922	0.96349	0.0594582	1.48061
GOTERM_BP_FAT	GO:0010628~positive regulation of gene expression	129	4.60385	0.000914122	MEF2C, RBM4, XRCC6, CNOT7, MED21, CITED2, CTNNB1, APP, MDFIC, RPS27A, BCL10, RAN, RELA, MTA2, ARID1B, MAPK1, HIF1A, JUN, MED17, VEGFA, PIAS2, NFE2L2, SMARCA1, SMARCA2, RNF20, SMARCA4, CNBP, SRF, ARNT, PLAGL1, BLOC1S2, SMARCB1, TCF4, RUNX1, ASF1A, RUNX2, TCF3, TAF2, DVL3, KLF13, TP53BP1, TGFBR1, CREBBP, SMAD5, MAML2, SRA1, TEAD1, SMAD3, TEAD3, SMAD1, USF2, SREBF2, HDAC5, ATF6, RNF6, ATF4, PSMC5, R…	2037	250	4909	1.24352	0.977297	0.0642514	1.69133
GOTERM_BP_FAT	GO:0031328~positive regulation of cellular biosynthetic process	145	5.17488	0.00319076	MEF2C, RBM4, XRCC6, EIF5A, CNOT7, MED21, CITED2, CTNNB1, APP, MDFIC, DDAH1, RPS27A, BCL10, IRS2, RAN, RELA, MTA2, ARID1B, IRS1, TNKS2, MAPK1, HIF1A, JUN, MED17, VEGFA, PDGFRA, PIAS2, NFE2L2, SMARCA1, SMARCA2, RNF20, SMARCA4, CNBP, CALR, SRF, ARNT, PLAGL1, BLOC1S2, SMARCB1, NPM1, TNKS, TCF4, RUNX1, ASF1A, RUNX2, TCF3, TAF2, DVL3, KLF13, TP53BP1, TGFBR1, CREBBP, SMAD5, MAML2, SRA1, CD276, TEAD1, SM…	2037	292	4909	1.19671	0.999998	0.161691	5.7867
GOTERM_BP_FAT	GO:0009891~positive regulation of biosynthetic process	146	5.21056	0.00362451	MEF2C, RBM4, XRCC6, EIF5A, CNOT7, MED21, CITED2, CTNNB1, APP, MDFIC, DDAH1, RPS27A, BCL10, IRS2, RAN, RELA, MTA2, ARID1B, IRS1, TNKS2, MAPK1, HIF1A, JUN, MED17, VEGFA, PDGFRA, PIAS2, NFE2L2, SMARCA1, SMARCA2, RNF20, SMARCA4, CNBP, CALR, SRF, ARNT, PLAGL1, BLOC1S2, SMARCB1, NPM1, TNKS, TCF4, RUNX1, ASF1A, RUNX2, TCF3, TAF2, DVL3, KLF13, TP53BP1, TGFBR1, CREBBP, SMAD5, MAML2, SRA1, CD276, TEAD1, SM…	2037	295	4909	1.1927	1	0.177316	6.54842
GOTERM_BP_FAT	GO:0045944~positive regulation of transcription from RNA polymerase II promoter	78	2.78373	0.0310287	MEF2C, ELF1, RBM4, XRCC6, NFKB1, ZEB1, CNOT7, MED21, CTNNB1, CITED2, ZBTB38, APP, GTF2A2, MKL2, YAP1, MYC, MTA2, RELA, TP53, RB1, CDK7, GTF2H1, NRIP1, NCOA2, HIF1A, MED17, JUN, ZMIZ1, VEGFA, ZFPM2, CAND1, SMARCA2, TBX19, SMARCA4, GLIS3, CNBP, ABLIM3, NUFIP1, SRF, TCF7L2, ARNT, STAT6, PLAGL1, TNFRSF1A, SMARCB1, NFAT5, TCEA1, SUPT4H1, RUNX1, TCF3, RUNX2, ERCC2, TAF2, CEBPB, KLF13, CREB1, MAML2, SRA…	2037	157	4909	1.19728	1	0.644922	44.4515
Annotation Cluster 17	Enrichment Score: 3.0010213357713074
Category	Term	Count	%	PValue	Genes	List Total	Pop Hits	Pop Total	Fold Enrichment	Bonferroni	Benjamini	FDR
UP_SEQ_FEATURE	domain:SAP	13	0.463954	0.000813094	XRCC6, ERI1, DEK, HNRNPU, SF3B2, SARNP, HNRNPUL2, PIAS3, HNRNPUL1, PIAS2, ACIN1, MKL2, MKL1	2621	14	6370	2.25677	0.991663	0.450296	1.56222
INTERPRO	IPR003034:DNA-binding SAP	13	0.463954	0.000823885	XRCC6, ERI1, DEK, HNRNPU, SF3B2, SARNP, HNRNPUL2, PIAS3, HNRNPUL1, PIAS2, ACIN1, MKL2, MKL1	2407	14	5842	2.25372	0.894441	0.221068	1.45772
SMART	SM00513:SAP	13	0.463954	0.00148227	XRCC6, ERI1, DEK, HNRNPU, SF3B2, SARNP, HNRNPUL2, PIAS3, HNRNPUL1, PIAS2, ACIN1, MKL2, MKL1	1365	14	3133	2.13129	0.449163	0.112426	2.04923
Annotation Cluster 18	Enrichment Score: 2.920513391599232
Category	Term	Count	%	PValue	Genes	List Total	Pop Hits	Pop Total	Fold Enrichment	Bonferroni	Benjamini	FDR
GOTERM_BP_FAT	GO:0006325~chromatin organization	95	3.39044	1.17482e-05	MORF4L1, HIST2H2AA3, HIST2H2AA4, RBM4, HIRA, INO80, CBX3, CBX6, CBX5, KDM1A, EPC2, HIST1H2BK, H2AFV, HIST1H2BI, H2AFZ, H2AFX, TLK1, MTA2, HDAC10, ARID1B, CHRAC1, HUWE1, BAZ1B, SMARCE1, SMARCA5, SMARCA1, RNF20, SMARCA2, EP400, SMARCA4, SUPT6H, HIST1H4L, HIST1H4K, TADA3, TADA1, TRRAP, HIST1H4A, HIST1H4B, SMARCB1, NPM1, HIST1H4E, LEO1, PBRM1, HIST1H4F, RNF168, HIST1H4C, HIST1H4D, HIST1H4I, ASF1A, HI…	2037	162	4909	1.41322	0.0474627	0.00220783	0.0219103
GOTERM_BP_FAT	GO:0016568~chromatin modification	75	2.67666	1.20225e-05	MORF4L1, RSF1, RBM4, HIRA, INO80, CBX3, CTCF, CBX6, KDM1A, EPC2, PRMT6, TLK1, USP16, KDM5B, BRD8, HDAC10, BANP, RB1, ARID1B, RBBP7, DAPK3, EYA3, CHRAC1, TAF12, SMARCE1, BPTF, BAZ1B, HUWE1, SMARCA5, RUVBL2, RUVBL1, SMARCA1, CARM1, NSD1, SMARCA2, RNF20, EP400, SMARCA4, SUPT6H, SMARCAD1, UTP3, SUPT3H, TADA3, TADA1, CDC73, NR3C1, TRRAP, CHD9, CHD1L, SMARCB1, PBRM1, LEO1, RNF168, KDM3A, ACTL6A, SUPT4H…	2037	122	4909	1.48151	0.0485437	0.0021612	0.0224219
GOTERM_BP_FAT	GO:0051276~chromosome organization	117	4.17559	1.53529e-05	MORF4L1, XRCC5, HIST2H2AA3, HIST2H2AA4, RBM4, XRCC6, HIRA, CBX3, INO80, CBX6, CBX5, KDM1A, EPC2, H2AFV, HIST1H2BK, HIST1H2BI, H2AFZ, H2AFX, TLK1, ACIN1, MTA2, HDAC10, ARID1B, CHRAC1, BAZ1B, SMARCE1, HUWE1, SMARCA5, PELO, AKAP8, SMARCA1, SMARCA2, RNF20, EP400, SMARCA4, SUPT6H, HIST1H4L, HIST1H4K, TADA3, TADA1, TRRAP, NIPBL, HIST1H4A, HIST1H4B, SMARCB1, NPM1, HIST1H4E, HIST1H4F, LEO1, PBRM1, RNF168…	2037	208	4909	1.35558	0.0615693	0.00264426	0.0286323
SP_PIR_KEYWORDS	chromatin regulator	57	2.03426	2.41328e-05	MORF4L1, RSF1, HIRA, CBX3, CTCF, CBX6, KDM1A, EPC2, PRMT6, TLK1, USP16, KDM5B, BRD8, DTX3L, HDAC10, BANP, RB1, ARID1B, RBBP7, DAPK3, EYA3, BPTF, SMARCE1, SMARCA5, RUVBL2, RUVBL1, SMARCA1, CARM1, NSD1, RNF20, EP400, SMARCA4, UTP3, NR3C1, TRRAP, CHD9, SMARCB1, PBRM1, RNF168, KDM3A, ACTL6A, BAZ2A, ASF1A, MYSM1, AEBP2, SMYD3, HDAC5, HDAC1, JMJD6, SMARCC1, H2AFY2, SMARCC2, DNMT1, KDM4C, SETD2, APBB1, …	2621	89	6373	1.55726	0.0160154	0.000733596	0.0361669
GOTERM_BP_FAT	GO:0016569~covalent chromatin modification	36	1.2848	0.00179687	MORF4L1, SUPT3H, TADA3, RBM4, TADA1, CDC73, TRRAP, KDM1A, PRMT6, LEO1, RNF168, KDM3A, ACTL6A, USP16, BAZ2A, MYSM1, BRD8, CREBBP, HDAC10, EYA3, HDAC5, TAF12, HUWE1, HDAC1, BAZ1B, JMJD6, RUVBL2, RUVBL1, SETD2, CARM1, APBB1, NSD1, RNF20, EP400, UBE2E1, SMARCA4	2037	57	4909	1.52205	0.999415	0.111444	3.29887
GOTERM_BP_FAT	GO:0016570~histone modification	35	1.24911	0.00272491	MORF4L1, SUPT3H, TADA3, RBM4, TADA1, CDC73, TRRAP, KDM1A, PRMT6, LEO1, RNF168, KDM3A, ACTL6A, USP16, BAZ2A, MYSM1, BRD8, CREBBP, HDAC10, HDAC5, EYA3, TAF12, HUWE1, HDAC1, BAZ1B, JMJD6, RUVBL2, RUVBL1, SETD2, CARM1, APBB1, NSD1, RNF20, EP400, UBE2E1	2037	56	4909	1.5062	0.999988	0.147061	4.96207
GOTERM_BP_FAT	GO:0043543~protein amino acid acylation	14	0.499643	0.245099	ZDHHC2, MORF4L1, SUPT3H, TAF12, TADA3, CREBBP, TADA1, ACTL6A, RUVBL2, TRRAP, RUVBL1, APBB1, EP400, BRD8	2037	26	4909	1.29765	1	0.99118	99.4723
GOTERM_BP_FAT	GO:0016573~histone acetylation	13	0.463954	0.258563	MORF4L1, SUPT3H, TAF12, TADA3, CREBBP, ACTL6A, TADA1, RUVBL2, RUVBL1, TRRAP, APBB1, EP400, BRD8	2037	24	4909	1.30537	1	0.993077	99.6227
GOTERM_BP_FAT	GO:0006473~protein amino acid acetylation	13	0.463954	0.319771	MORF4L1, SUPT3H, TAF12, TADA3, CREBBP, ACTL6A, TADA1, RUVBL2, RUVBL1, TRRAP, APBB1, EP400, BRD8	2037	25	4909	1.25316	1	0.997566	99.9244
Annotation Cluster 19	Enrichment Score: 2.8839797844161423
Category	Term	Count	%	PValue	Genes	List Total	Pop Hits	Pop Total	Fold Enrichment	Bonferroni	Benjamini	FDR
SP_PIR_KEYWORDS	cytoskeleton	164	5.85296	0.000113787	SEPT2, DYNC2LI1, CEP78, UTRN, CAPZA1, PDLIM2, RANGAP1, CTNNB1, KLHL5, IFT20, INCENP, DYNC2H1, PPP4C, DBNL, TWF1, ROCK1, ACTN1, TMSB10, DCTN3, CTNNA1, PCM1, DCTN1, ARPC1B, NDEL1, CEP350, RCC2, FNBP1L, CC2D2A, FLII, HSPB1, CLIP1, PDE4DIP, BIN3, MAP7D1, MYO18A, SEPT7, ADD3, SEPT8, SEPT9, ADD1, BBS4, SSH3, DAG1, CDC42SE1, ITGB5, CEP164, ARPC4, MYO9B, TTC8, ARPC5, CAPZB, LLGL1, PFN1, CDC42EP2, PFN2, M…	2621	318	6373	1.25399	0.073302	0.00262165	0.170421
GOTERM_CC_FAT	GO:0044430~cytoskeletal part	181	6.45967	0.000157784	SEPT2, VAPA, CAPZA2, DYNC2LI1, CEP78, UTRN, CAPZA1, CBX3, CTNNB1, PNN, KIF13A, APP, HOMER3, IFT20, KIFAP3, INCENP, DYNC2H1, PPP4C, ROCK1, PICK1, TANC1, VPS41, DCTN3, PCM1, DCTN1, TNKS2, ARPC1B, NME2, NDEL1, CEP350, RCC2, NME1, TRIM32, CC2D2A, FLII, HSPB1, CLIP1, PDE4DIP, TNFAIP3, MAP7D1, MYO18A, SEPT7, SEPT8, SEPT9, ADD1, MYL6, BBS4, LMNB2, CEP164, ARPC4, MYO9B, TTC8, ARPC5, CAPZB, MYO9A, LLGL1, …	1880	361	4615	1.23079	0.105846	0.00531334	0.23809
GOTERM_CC_FAT	GO:0015630~microtubule cytoskeleton	128	4.56817	0.000196758	SEPT2, VAPA, DYNC2LI1, CEP78, CBX3, CTNNB1, KIF13A, APP, IFT20, INCENP, KIFAP3, DYNC2H1, PPP4C, ROCK1, VPS41, DCTN3, PCM1, DCTN1, TNKS2, NME2, NDEL1, CEP350, RCC2, NME1, CC2D2A, FLII, CLIP1, HSPB1, PDE4DIP, TNFAIP3, MAP7D1, SEPT7, SEPT9, BBS4, ARPC4, CEP164, TTC8, NPHP3, PEA15, TUBB, MACF1, BLOC1S2, KATNA1, CEP170, NPM1, SKA2, CLASP1, TNKS, EMD, CKAP2, DHX9, KIF3B, KIF3A, CKAP5, SMEK1, CDC27, ATM…	1880	245	4615	1.2825	0.13022	0.00632155	0.296819
GOTERM_CC_FAT	GO:0005856~cytoskeleton	259	9.2434	0.00169197	VAPA, DYNC2LI1, UTRN, PDLIM2, CCT3, CTNNB1, KIF13A, APP, HOMER3, IFT20, KIFAP3, INCENP, INTS6, DYNC2H1, STAG2, DBNL, ROCK1, TANC1, VPS41, CTNNA1, PCM1, DCTN3, DCTN1, FARP1, MAPK1, NME2, RCC2, CEP350, NME1, MAPK3, CC2D2A, FLII, PDE4DIP, BIN3, ADD3, MYO18A, ADD1, ALDOA, LMNB2, DAG1, CEP164, MYO9B, CAPZB, MYO9A, PFN1, NPHP3, PEA15, CDC42EP2, PFN2, MACF1, CEP170, SKA2, TNKS, EMD, DHX9, KIF3B, KIF3A, …	1880	554	4615	1.14764	0.698992	0.0346961	2.52567
GOTERM_CC_FAT	GO:0005815~microtubule organizing center	63	2.24839	0.0258253	LZTS2, KIAA0368, CEP78, LATS1, LATS2, ARL2BP, CTNNB1, PCGF5, NDE1, CEP250, IFT20, RANBP1, PPP4C, CNTLN, KIF2A, IFT80, ROCK1, DCTN3, PCM1, TNKS2, NME2, NDEL1, HIPK1, CEP350, NME1, CC2D2A, FLII, TOM1, PDE4DIP, MAPRE1, RUVBL1, TNFAIP3, BBS4, SDCCAG8, PARD3, CEP120, EXOC7, HAUS1, CETN2, CEP164, TTC8, BLOC1S2, CEP57, KATNA1, CEP170, NPM1, PKD2, ODF2, PAFAH1B1, TNKS, CLASP1, APEX1, DHX9, CKAP5, SMEK1, …	1880	125	4615	1.23721	1	0.248284	32.6491
GOTERM_CC_FAT	GO:0005813~centrosome	58	2.06995	0.0321808	LZTS2, KIAA0368, CEP78, LATS1, LATS2, ARL2BP, CTNNB1, PCGF5, NDE1, CEP250, IFT20, RANBP1, PPP4C, CNTLN, KIF2A, ROCK1, DCTN3, PCM1, TNKS2, NME2, NDEL1, CEP350, HIPK1, NME1, FLII, TOM1, PDE4DIP, MAPRE1, RUVBL1, TNFAIP3, BBS4, SDCCAG8, CEP120, EXOC7, HAUS1, CETN2, CEP164, TTC8, BLOC1S2, CEP57, KATNA1, CEP170, NPM1, ODF2, PAFAH1B1, TNKS, CLASP1, APEX1, DHX9, CKAP5, SMEK1, CDC27, CDC25B, NEDD1, NUP62,…	1880	115	4615	1.23807	1	0.288976	38.9898
Annotation Cluster 20	Enrichment Score: 2.7357725845945975
Category	Term	Count	%	PValue	Genes	List Total	Pop Hits	Pop Total	Fold Enrichment	Bonferroni	Benjamini	FDR
GOTERM_CC_FAT	GO:0000792~heterochromatin	15	0.535332	0.000548662	TRIM28, CBX3, MBD2, CBX5, TNKS1BP1, ATRX, BAZ1B, SMARCC1, INCENP, H2AFY2, H3F3A, H3F3B, H2AFX, TOP2B, BAZ2A, SMARCA4	1880	17	4615	2.16599	0.322339	0.0138006	0.825631
GOTERM_CC_FAT	GO:0000790~nuclear chromatin	20	0.713776	0.000818987	MORF4L1, TRIM28, HIRA, CBX3, NUFIP1, PPP1R10, SIRT7, CBX5, CITED2, TNKS1BP1, ATRX, CSNK2A1, SIN3A, HDAC1, SMARCC1, JUN, H2AFY2, H3F3A, H3F3B, H2AFX, BAZ2A	1880	26	4615	1.8883	0.440605	0.0191771	1.23007
GOTERM_CC_FAT	GO:0005720~nuclear heterochromatin	9	0.321199	0.013807	ATRX, TNKS1BP1, SMARCC1, TRIM28, H2AFY2, H3F3A, CBX3, H3F3B, H2AFX, CBX5	1880	10	4615	2.20931	0.999948	0.169717	18.9438
Annotation Cluster 21	Enrichment Score: 2.6910601599386075
Category	Term	Count	%	PValue	Genes	List Total	Pop Hits	Pop Total	Fold Enrichment	Bonferroni	Benjamini	FDR
GOTERM_BP_FAT	GO:0006403~RNA localization	31	1.10635	3.66565e-05	NCBP1, NUP160, EIF5A, NUP93, STAU1, NUP214, SEH1L, NPM1, MAGOHB, TNKS, NUP37, RANBP2, TPR, XPOT, UPF1, MYO1C, RAN, CKAP5, MAGOH, HNRNPA2B1, G3BP2, CASC3, HNRNPA1, EIF4A3, PHAX, NUP62, TSC1, THOC6, THOC2, NUP43, MVP	2037	41	4909	1.82213	0.140775	0.00581854	0.0683492
GOTERM_BP_FAT	GO:0050658~RNA transport	30	1.07066	6.57345e-05	NCBP1, NUP160, EIF5A, NUP93, NUP214, SEH1L, NPM1, MAGOHB, TNKS, NUP37, RANBP2, TPR, XPOT, UPF1, MYO1C, RAN, CKAP5, MAGOH, HNRNPA2B1, G3BP2, CASC3, HNRNPA1, EIF4A3, PHAX, NUP62, TSC1, THOC6, THOC2, NUP43, MVP	2037	40	4909	1.80744	0.23821	0.00933833	0.122536
GOTERM_BP_FAT	GO:0050657~nucleic acid transport	30	1.07066	6.57345e-05	NCBP1, NUP160, EIF5A, NUP93, NUP214, SEH1L, NPM1, MAGOHB, TNKS, NUP37, RANBP2, TPR, XPOT, UPF1, MYO1C, RAN, CKAP5, MAGOH, HNRNPA2B1, G3BP2, CASC3, HNRNPA1, EIF4A3, PHAX, NUP62, TSC1, THOC6, THOC2, NUP43, MVP	2037	40	4909	1.80744	0.23821	0.00933833	0.122536
GOTERM_BP_FAT	GO:0051236~establishment of RNA localization	30	1.07066	6.57345e-05	NCBP1, NUP160, EIF5A, NUP93, NUP214, SEH1L, NPM1, MAGOHB, TNKS, NUP37, RANBP2, TPR, XPOT, UPF1, MYO1C, RAN, CKAP5, MAGOH, HNRNPA2B1, G3BP2, CASC3, HNRNPA1, EIF4A3, PHAX, NUP62, TSC1, THOC6, THOC2, NUP43, MVP	2037	40	4909	1.80744	0.23821	0.00933833	0.122536
GOTERM_BP_FAT	GO:0015931~nucleobase, nucleoside, nucleotide and nucleic acid transport	31	1.10635	0.000537914	NCBP1, NUP160, EIF5A, GJA1, NUP93, NUP214, SEH1L, NPM1, MAGOHB, TNKS, NUP37, RANBP2, TPR, XPOT, UPF1, MYO1C, RAN, CKAP5, MAGOH, HNRNPA2B1, G3BP2, CASC3, HNRNPA1, EIF4A3, PHAX, NUP62, TSC1, THOC6, THOC2, NUP43, MVP	2037	45	4909	1.66016	0.892151	0.0444321	0.998563
SP_PIR_KEYWORDS	mRNA transport	22	0.785153	0.000623644	NCBP1, MYO1C, NUP160, MAGOH, G3BP2, EIF5A, NUP93, CASC3, HNRNPA1, EIF4A3, NUP214, NUP62, SEH1L, THOC6, MAGOHB, TNKS, NUP37, RANBP2, THOC2, TPR, NUP43, MVP	2621	29	6373	1.8446	0.341208	0.0125673	0.930723
GOTERM_CC_FAT	GO:0005643~nuclear pore	24	0.856531	0.001323	XPOT, MYO1C, NUP160, RAN, EIF5A, NUP93, RANGAP1, SUMO1, NUP214, NUP62, SEH1L, IPO7, SEC13, TNKS, NUP37, NUTF2, KPNA4, RANBP2, TPR, KPNA2, TNPO1, NUP43, KPNB1, MVP	1880	34	4615	1.73279	0.608837	0.0289062	1.98004
SP_PIR_KEYWORDS	nuclear pore complex	13	0.463954	0.0025251	NUP214, MYO1C, NUP62, NUP160, SEH1L, NUP93, EIF5A, TNKS, NUP37, RANBP2, TPR, NUP43, MVP	2621	15	6373	2.10731	0.815744	0.0435353	3.7188
GOTERM_BP_FAT	GO:0051028~mRNA transport	23	0.820842	0.00297913	NCBP1, UPF1, MYO1C, NUP160, MAGOH, G3BP2, EIF5A, NUP93, CASC3, HNRNPA1, EIF4A3, NUP214, NUP62, SEH1L, THOC6, MAGOHB, TNKS, NUP37, RANBP2, THOC2, TPR, NUP43, MVP	2037	33	4909	1.67964	0.999996	0.153698	5.41294
SP_PIR_KEYWORDS	translocation	21	0.749465	0.00712085	MYO1C, NUP160, RRBP1, ZMAT3, EIF5A, NUP93, TRAM2, NUP214, SEC61B, NUP62, SEH1L, TNKS, NUP37, RANBP2, TPR, SERP2, NUP43, TRAM1, SEC61A1, SEC61G, MVP	2621	31	6373	1.64716	0.991611	0.0948023	10.158
GOTERM_CC_FAT	GO:0046930~pore complex	25	0.89222	0.0104482	NUP160, NUP93, EIF5A, RANGAP1, NUP214, SUMO1, SEH1L, NUP37, TNKS, RANBP2, TPR, KPNB1, TNPO1, XPOT, MYO1C, RAN, NUP62, IPO7, BAX, SEC13, NUTF2, KPNA4, KPNA2, NUP43, MVP	1880	40	4615	1.53424	0.999417	0.140989	14.6717
GOTERM_BP_FAT	GO:0006405~RNA export from nucleus	12	0.428266	0.0739706	XPOT, PHAX, NCBP1, UPF1, TSC1, NUP160, RAN, NPM1, THOC6, EIF5A, THOC2, HNRNPA1	2037	18	4909	1.60661	1	0.854525	76.15
GOTERM_BP_FAT	GO:0051168~nuclear export	15	0.535332	0.183195	XPOT, NCBP1, UPF1, NUP160, RAN, EIF5A, CALR, HNRNPA1, PHAX, NUP214, TSC1, NPM1, RPS15, THOC6, THOC2	2037	27	4909	1.33884	1	0.9774	97.7047
GOTERM_BP_FAT	GO:0006406~mRNA export from nucleus	6	0.214133	0.603258	NCBP1, UPF1, NUP160, THOC6, EIF5A, THOC2	2037	12	4909	1.20496	1	0.999979	100
Annotation Cluster 22	Enrichment Score: 2.6562948183829005
Category	Term	Count	%	PValue	Genes	List Total	Pop Hits	Pop Total	Fold Enrichment	Bonferroni	Benjamini	FDR
SP_PIR_KEYWORDS	helicase	39	1.39186	5.9036e-06	XRCC5, SMARCAD1, BTAF1, SKIV2L, XRCC6, INO80, SETX, DDX27, CHD9, DDX46, DDX18, CHD1L, DDX23, DHX15, CHD2, DDX21, DHX57, ERCC2, DHX9, UPF1, G3BP1, YTHDC2, DDX6, ATRX, EIF4A3, RECQL, DHX29, ASCC3, EIF4A1, SNRNP200, SMARCA5, DDX50, RUVBL2, DHX40, RUVBL1, SMARCA1, SMARCA2, EP400, SMARCA4	2621	53	6373	1.78923	0.00394173	0.000246815	0.00884864
GOTERM_MF_FAT	GO:0004386~helicase activity	41	1.46324	1.19861e-05	XRCC5, SMARCAD1, BTAF1, SKIV2L, XRCC6, INO80, CETN2, SETX, DDX27, CHD9, DDX46, CHD1L, DDX18, DDX23, DHX15, CHD2, DDX21, DHX57, ERCC2, DHX9, UPF1, G3BP1, YTHDC2, DDX6, MCM6, ATRX, EIF4A3, RECQL, DHX29, ASCC3, EIF4A1, SNRNP200, SMARCA5, DDX50, RUVBL2, DHX40, RUVBL1, SMARCA1, SMARCA2, EP400, SMARCA4	1942	57	4649	1.72195	0.0167113	0.00280481	0.0197575
INTERPRO	IPR014001:DEAD-like helicase, N-terminal	31	1.10635	3.15543e-05	SMARCAD1, BTAF1, SKIV2L, INO80, DDX27, CHD9, DDX18, CHD1L, DDX46, DDX23, DHX15, CHD2, DDX21, DHX57, DHX9, YTHDC2, DDX6, ATRX, EIF4A3, RECQL, DHX29, ASCC3, EIF4A1, SNRNP200, SMARCA5, DDX50, DHX40, SMARCA1, SMARCA2, EP400, SMARCA4	2407	41	5842	1.83512	0.0824805	0.0282861	0.0562026
INTERPRO	IPR014021:Helicase, superfamily 1 and 2, ATP-binding	31	1.10635	6.70715e-05	SMARCAD1, BTAF1, SKIV2L, INO80, DDX27, CHD9, DDX18, CHD1L, DDX46, DDX23, DHX15, CHD2, DDX21, DHX57, DHX9, YTHDC2, DDX6, ATRX, EIF4A3, RECQL, DHX29, ASCC3, EIF4A1, SNRNP200, SMARCA5, DDX50, DHX40, SMARCA1, SMARCA2, EP400, SMARCA4	2407	42	5842	1.79142	0.167213	0.0447138	0.119428
INTERPRO	IPR001650:DNA/RNA helicase, C-terminal	31	1.10635	6.70715e-05	SMARCAD1, BTAF1, SKIV2L, INO80, DDX27, CHD9, DDX18, CHD1L, DDX46, DDX23, DHX15, CHD2, DDX21, DHX57, DHX9, YTHDC2, DDX6, ATRX, EIF4A3, RECQL, DHX29, ASCC3, EIF4A1, SNRNP200, SMARCA5, DDX50, DHX40, SMARCA1, SMARCA2, EP400, SMARCA4	2407	42	5842	1.79142	0.167213	0.0447138	0.119428
SMART	SM00487:DEXDc	31	1.10635	0.000106096	SMARCAD1, BTAF1, SKIV2L, INO80, DDX27, CHD9, DDX18, CHD1L, DDX46, DDX23, DHX15, CHD2, DDX21, DHX57, DHX9, YTHDC2, DDX6, ATRX, EIF4A3, RECQL, DHX29, ASCC3, EIF4A1, SNRNP200, SMARCA5, DDX50, DHX40, SMARCA1, SMARCA2, EP400, SMARCA4	1365	41	3133	1.73542	0.0417561	0.0211007	0.147989
GOTERM_MF_FAT	GO:0070035~purine NTP-dependent helicase activity	27	0.963597	0.000199571	XRCC5, SKIV2L, XRCC6, CETN2, DDX27, DDX18, CHD1L, DDX46, DDX23, DHX15, CHD2, DDX21, ERCC2, DHX57, DHX9, UPF1, G3BP1, DDX6, EIF4A3, RECQL, DHX29, ASCC3, SNRNP200, EIF4A1, DDX50, RUVBL2, DHX40	1942	36	4649	1.79544	0.244688	0.0251887	0.32849
GOTERM_MF_FAT	GO:0008026~ATP-dependent helicase activity	27	0.963597	0.000199571	XRCC5, SKIV2L, XRCC6, CETN2, DDX27, DDX18, CHD1L, DDX46, DDX23, DHX15, CHD2, DDX21, ERCC2, DHX57, DHX9, UPF1, G3BP1, DDX6, EIF4A3, RECQL, DHX29, ASCC3, SNRNP200, EIF4A1, DDX50, RUVBL2, DHX40	1942	36	4649	1.79544	0.244688	0.0251887	0.32849
UP_SEQ_FEATURE	domain:Helicase C-terminal	29	1.03498	0.000201823	SMARCAD1, BTAF1, SKIV2L, INO80, DDX27, CHD9, DDX18, CHD1L, DDX46, DDX23, DHX15, CHD2, DDX21, DHX57, DHX9, YTHDC2, DDX6, ATRX, EIF4A3, RECQL, DHX29, EIF4A1, SMARCA5, DDX50, DHX40, SMARCA1, SMARCA2, EP400, SMARCA4	2621	40	6370	1.76202	0.695123	0.326959	0.389946
UP_SEQ_FEATURE	domain:Helicase ATP-binding	30	1.07066	0.000227013	SMARCAD1, BTAF1, SKIV2L, INO80, DDX27, CHD9, DDX18, CHD1L, DDX46, DDX23, DHX15, CHD2, DDX21, ERCC2, DHX57, DHX9, YTHDC2, DDX6, ATRX, EIF4A3, RECQL, DHX29, EIF4A1, SMARCA5, DDX50, DHX40, SMARCA1, SMARCA2, EP400, SMARCA4	2621	42	6370	1.73598	0.737138	0.234499	0.438516
SMART	SM00490:HELICc	30	1.07066	0.000365079	SMARCAD1, BTAF1, SKIV2L, INO80, DDX27, CHD9, DDX18, CHD1L, DDX46, DDX23, DHX15, CHD2, DDX21, DHX57, DHX9, YTHDC2, DDX6, ATRX, EIF4A3, RECQL, DHX29, ASCC3, EIF4A1, SNRNP200, SMARCA5, DDX50, DHX40, SMARCA1, SMARCA2, SMARCA4	1365	41	3133	1.67944	0.136523	0.0477517	0.50838
INTERPRO	IPR000330:SNF2-related	12	0.428266	0.00173399	ATRX, SMARCAD1, CHD9, BTAF1, CHD1L, SMARCA5, CHD2, INO80, SMARCA1, SMARCA2, EP400, SMARCA4	2407	13	5842	2.24039	0.991213	0.349753	3.04467
GOTERM_MF_FAT	GO:0016887~ATPase activity	69	2.46253	0.0168371	XRCC5, RSF1, XRCC6, INO80, ATP10D, TAPBP, ATP2B1, DDX27, DDX18, ATP2B4, DDX23, VPS4B, DYNC2H1, DDX21, ACIN1, DYNC1H1, G3BP1, PICK1, GTF2H3, ATP6V1H, CDK7, ATP6V1D, ATP6V1F, GTF2H1, EIF4A3, RECQL, RFC4, DHX29, BPTF, ASCC3, SNRNP200, EIF4A1, SMARCA5, RUVBL2, RUVBL1, SMARCA1, SMARCA2, MYO18A, SMARCA4, MYL6, SKIV2L, CETN2, MYO9B, ATP6V0C, CHD1L, DDX46, KATNA1, CHD2, DHX15, SNRNP35, HSPA8, DHX57, ERCC…	1942	133	4649	1.24196	1	0.514935	24.4162
INTERPRO	IPR011545:DNA/RNA helicase, DEAD/DEAH box type, N-terminal	16	0.571021	0.0284716	DHX9, SKIV2L, DDX6, DDX27, EIF4A3, RECQL, DDX18, DDX46, DHX29, DDX23, ASCC3, EIF4A1, SNRNP200, DDX50, DDX21, DHX57	2407	24	5842	1.61806	1	0.908169	40.2269
GOTERM_MF_FAT	GO:0042623~ATPase activity, coupled	57	2.03426	0.0311559	XRCC5, XRCC6, ATP10D, TAPBP, ATP2B1, DDX27, ATP2B4, DDX18, DDX23, VPS4B, DDX21, DYNC1H1, G3BP1, GTF2H3, ATP6V1H, CDK7, ATP6V1D, ATP6V1F, GTF2H1, EIF4A3, RECQL, RFC4, DHX29, BPTF, ASCC3, SNRNP200, EIF4A1, RUVBL2, SMARCA1, MYO18A, SMARCA2, SMARCA4, MYL6, SKIV2L, CETN2, MYO9B, ATP6V0C, DDX46, CHD1L, KATNA1, DHX15, CHD2, SNRNP35, HSPA8, DHX57, ERCC2, DHX9, UPF1, ATP1A1, ATP13A3, DDX6, ATP7A, MNAT1, A…	1942	110	4649	1.24049	1	0.699636	40.654
GOTERM_MF_FAT	GO:0004004~ATP-dependent RNA helicase activity	8	0.28551	0.0687366	EIF4A3, DHX9, DDX18, UPF1, DDX23, SKIV2L, G3BP1, DDX21	1942	10	4649	1.91514	1	0.859598	69.0862
GOTERM_MF_FAT	GO:0003724~RNA helicase activity	10	0.356888	0.0757868	EIF4A3, DHX9, DDX18, UPF1, DDX23, SKIV2L, G3BP1, DHX15, DDX21, DDX6	1942	14	4649	1.70995	1	0.871528	72.7263
INTERPRO	IPR000629:RNA helicase, ATP-dependent, DEAD-box, conserved site	9	0.321199	0.113804	DDX27, EIF4A3, DDX46, DDX18, DDX23, INTS6, EIF4A1, DDX21, DDX6	2407	13	5842	1.68029	1	0.996918	88.3807
GOTERM_MF_FAT	GO:0008186~RNA-dependent ATPase activity	8	0.28551	0.122133	EIF4A3, DHX9, DDX18, UPF1, DDX23, SKIV2L, G3BP1, DDX21	1942	11	4649	1.74104	1	0.93501	88.321
UP_SEQ_FEATURE	short sequence motif:DEAD box	7	0.249822	0.271862	DDX27, EIF4A3, DDX46, DDX18, DDX23, EIF4A1, DDX6	2621	11	6370	1.5466	1	1	99.7848
UP_SEQ_FEATURE	short sequence motif:Q motif	9	0.321199	0.316489	DDX27, EIF4A3, DDX46, DDX18, DDX23, EIF4A1, DDX50, DDX21, DDX6	2621	16	6370	1.36708	1	1	99.9367
INTERPRO	IPR014014:RNA helicase, DEAD-box type, Q motif	9	0.321199	0.318078	DDX27, EIF4A3, DDX46, DDX18, DDX23, EIF4A1, DDX50, DDX21, DDX6	2407	16	5842	1.36524	1	0.999995	99.8909
Annotation Cluster 23	Enrichment Score: 2.5813092202907284
Category	Term	Count	%	PValue	Genes	List Total	Pop Hits	Pop Total	Fold Enrichment	Bonferroni	Benjamini	FDR
SP_PIR_KEYWORDS	isopeptide bond	88	3.14061	0.000236425	MEF2C, HIST2H2AA3, MEF2A, HIST2H2AA4, SNIP1, SYNCRIP, RANGAP1, CUL3, CUL5, HIST1H2BK, VPS13C, H2AFV, HIST1H2BI, H2AFZ, RPL10, H2AFX, RPN2, ACIN1, RPS27A, RAN, NKTR, NME2, HIF1A, NME1, MAP7D1, HIST1H4L, HIST1H4K, MCL1, HDGF, NEDD8, PFN1, TUBB, HNRNPK, HIST1H4A, HIST1H4B, HNRNPF, NPM1, HIST1H4E, HIST1H4F, EIF3I, HIST1H4C, HIST1H4D, HIST1H4I, HIST1H4J, HIST1H4H, FN1, HIST1H3J, CREBBP, HNRNPA1, HDAC1…	2621	158	6373	1.35426	0.14631	0.00508982	0.353796
SP_PIR_KEYWORDS	ubl conjugation	137	4.88936	0.00259971	MEF2C, MKRN1, XRCC5, HIST2H2AA3, MEF2A, HIST2H2AA4, SNIP1, HIRA, SYNCRIP, RANGAP1, CTNNB1, CUL3, CUL5, H2AFV, VPS13C, HIST1H2BK, HIST1H2BI, TARDBP, H2AFZ, RABGEF1, RPL10, H2AFX, NGFRAP1, RPN2, ACIN1, RNF34, RPS27A, RAN, RELA, HLA-B, CTNNA1, DCTN1, NKTR, NME2, HIF1A, ARRB2, NME1, PIAS3, MIB2, TRIM32, PIAS2, MAP7D1, ADD3, HIST1H4L, HIST1H4K, MCL1, HDGF, BEX4, HNRNPM, PFN1, TUBB, HNRNPK, HIST1H4A, H…	2621	275	6373	1.21134	0.824738	0.0436709	3.82668
UP_SEQ_FEATURE	cross-link:Glycyl lysine isopeptide (Lys-Gly) (interchain with G-Cter in ubiquitin)	51	1.82013	0.0293395	HIST2H2AA3, HIST2H2AA4, SYNCRIP, PIP5K1A, YBX1, RPS3, HIST2H2AB, HIST1H2BK, VPS13C, H2AFV, HIST1H2BI, H2AFZ, RPL10, H2AFX, RPN2, ACIN1, KPNB1, RPS27A, RAN, TP53, SLC3A2, KTN1, UBE2I, RBBP7, NKTR, TARS, NME2, HIF1A, NME1, GNAS, MAP7D1, HIST1H2AC, MCL1, NR3C1, TPM1, PFN1, TUBB, SET, HNRNPK, SLC39A7, EIF3I, TCEA2, RBM27, RBM25, BUB3, C21ORF59, HIST1H3J, HIST1H2BC, HIST1H2BE, HIST1H2BF, HIST1H2BG, TM…	2621	98	6370	1.26478	1	0.983016	43.8096
Annotation Cluster 24	Enrichment Score: 2.5766427135217453
Category	Term	Count	%	PValue	Genes	List Total	Pop Hits	Pop Total	Fold Enrichment	Bonferroni	Benjamini	FDR
GOTERM_MF_FAT	GO:0008135~translation factor activity, nucleic acid binding	35	1.24911	0.000267731	EEF1B2, ELL, HBS1L, EIF5, ABTB1, EIF5B, EIF5A, GCN1L1, EIF3C, EIF3D, EIF3CL, EIF3G, EIF1AX, EIF3L, EIF1, TCEA1, EIF3I, TCEA2, EIF3M, C12ORF65, EEF1A1, GTF2H3, EEF2, EIF1B, DENR, ETF1, EIF4G1, EIF4G2, EIF4G3, EIF4E, DHX29, EIF4A1, EIF2S2, EEF1D, EIF4E2	1942	51	4649	1.64289	0.313727	0.0285447	0.440449
SP_PIR_KEYWORDS	Initiation factor	20	0.713776	0.00095214	EIF5, EIF5B, EIF1B, EIF4G1, EIF3C, EIF3D, EIF4G2, EIF3CL, EIF4G3, EIF4E, EIF3G, DHX29, EIF1AX, EIF4A1, EIF2S2, EIF3L, EIF1, EIF3I, EIF3M, EIF4E2	2621	26	6373	1.8704	0.471274	0.0185691	1.41771
GOTERM_MF_FAT	GO:0003743~translation initiation factor activity	21	0.749465	0.00139708	EIF5, EIF5B, EIF1B, DENR, EIF4G1, EIF3C, EIF3D, EIF4G2, EIF3CL, EIF4G3, EIF4E, EIF3G, DHX29, EIF1AX, EIF4A1, EIF2S2, EIF3L, EIF1, EIF3I, EIF3M, EIF4E2	1942	28	4649	1.79544	0.859937	0.115607	2.27837
GOTERM_BP_FAT	GO:0006413~translational initiation	18	0.642398	0.00342373	PAIP1, EIF5, EIF1B, DENR, RPS3, EIF3C, EIF3D, EIF3CL, EIF4E, EIF3G, RPS3A, EIF1AX, EIF2S2, EIF3L, EIF1, EIF3I, EIF3M, EIF4E2	2037	24	4909	1.80744	0.999999	0.170372	6.19657
GOTERM_CC_FAT	GO:0005852~eukaryotic translation initiation factor 3 complex	7	0.249822	0.107317	EIF3C, EIF3D, EIF3CL, EIF3G, EIF3L, EIF3I, EIF3M	1880	9	4615	1.90928	1	0.563852	82.0024
Annotation Cluster 25	Enrichment Score: 2.5442134145734085
Category	Term	Count	%	PValue	Genes	List Total	Pop Hits	Pop Total	Fold Enrichment	Bonferroni	Benjamini	FDR
GOTERM_BP_FAT	GO:0010605~negative regulation of macromolecule metabolic process	171	6.10278	0.000164146	MEF2C, SRP14, JDP2, RBM3, CBX3, CBX5, CTNNB1, CITED2, KDM1A, EIF4EBP1, HOXC8, SIN3A, CDKN2A, WWP2, TIA1, SND1, DNAJC1, RPS27A, TWIST1, IBTK, ANAPC5, RELA, MTA2, GABPA, PKIG, ANAPC4, HDAC10, SKP2, SMARCE1, TRIM33, JUN, ASB1, SMARCA2, EIF2AK4, SMARCA4, FZR1, CAV1, ENPP1, SNX6, TAF9B, GIPC1, CALR, TIMP3, TIMP1, RPS26, HEXIM1, DRAP1, ITGAV, NPM1, UBE2D1, TCF4, TCF25, RUNX2, CD276, S100A11, CDC23, NDF…	2037	333	4909	1.23752	0.493108	0.0192258	0.305721
GOTERM_BP_FAT	GO:0051253~negative regulation of RNA metabolic process	87	3.10493	0.000435935	MEF2C, JDP2, RSF1, TSG101, CBX3, NFKB1, ZNF202, CTCF, ZEB1, CBX5, CTNNB1, CITED2, SAP30, KDM1A, HOXC8, SIN3A, PRMT6, NR2F2, KDM5B, ZNF496, NFX1, TWIST1, ZNF281, SP100, MTA2, LDB1, ARID5B, GABPA, PKIG, TP53, HDAC10, UBE2I, RB1, SPEN, RBBP7, MBD2, PURA, NRIP1, CTNNBIP1, NCOA2, SMARCE1, BPTF, MDM2, ZFPM2, MDM4, LCOR, NSD1, SMARCA2, RASD1, SMARCA4, ZMYND11, GLIS3, SBNO2, MTDH, TAF9B, CALR, RPS26, SOR…	2037	157	4909	1.33543	0.835481	0.0393115	0.809982
GOTERM_BP_FAT	GO:0045892~negative regulation of transcription, DNA-dependent	85	3.03355	0.000606376	MEF2C, JDP2, RSF1, TSG101, CBX3, NFKB1, ZNF202, CTCF, ZEB1, CBX5, CTNNB1, CITED2, SAP30, KDM1A, HOXC8, SIN3A, PRMT6, NR2F2, KDM5B, ZNF496, NFX1, TWIST1, ZNF281, SP100, MTA2, LDB1, ARID5B, GABPA, PKIG, TP53, HDAC10, UBE2I, RB1, SPEN, RBBP7, MBD2, PURA, NRIP1, CTNNBIP1, NCOA2, SMARCE1, BPTF, MDM2, ZFPM2, MDM4, LCOR, NSD1, SMARCA2, RASD1, SMARCA4, ZMYND11, GLIS3, SBNO2, MTDH, TAF9B, CALR, SORBS3, CI…	2037	154	4909	1.33015	0.918777	0.0489713	1.12497
GOTERM_BP_FAT	GO:0010629~negative regulation of gene expression	117	4.17559	0.00209443	MEF2C, JDP2, RBM3, CBX3, CBX5, CITED2, CTNNB1, KDM1A, HOXC8, SIN3A, WWP2, SND1, TWIST1, MTA2, GABPA, PKIG, HDAC10, SKP2, SMARCE1, TRIM33, SMARCA2, SMARCA4, SNX6, TAF9B, CALR, DRAP1, HEXIM1, TCF4, TCF25, RUNX2, NDFIP2, SMAD3, SNW1, SMAD1, UBP1, HDAC5, PSMC5, HDAC1, NEDD4, UBA3, SMARCC2, DNMT1, RBPJ, ADAR, COPS2, RSF1, TSG101, ZNF202, CTCF, ZEB2, NFKB1, ZEB1, SAP30, PRMT6, LRRFIP1, NR2F2, MYC, ZNF4…	2037	228	4909	1.23667	0.99983	0.121485	3.83514
GOTERM_BP_FAT	GO:0010558~negative regulation of macromolecule biosynthetic process	121	4.31834	0.00220224	MEF2C, SRP14, JDP2, CBX3, CBX5, CITED2, CTNNB1, KDM1A, EIF4EBP1, HOXC8, SIN3A, TIA1, TWIST1, MTA2, GABPA, PKIG, HDAC10, SMARCE1, TRIM33, ASB1, SMARCA2, EIF2AK4, SMARCA4, ENPP1, SNX6, TAF9B, CALR, HEXIM1, DRAP1, ITGAV, TCF4, TCF25, RUNX2, S100A11, CD276, SMAD3, SNW1, UBP1, HDAC5, PSMC5, HDAC1, TSC1, NEDD4, UBA3, SMARCC2, DNMT1, RBPJ, COPS2, RSF1, TSG101, ZNF202, CTCF, ZEB2, NFKB1, ZEB1, SAP30, PRM…	2037	237	4909	1.23038	0.999891	0.125579	4.02873
GOTERM_BP_FAT	GO:0031327~negative regulation of cellular biosynthetic process	122	4.35403	0.00370416	MEF2C, SRP14, JDP2, CBX3, CBX5, CITED2, CTNNB1, KDM1A, EIF4EBP1, HOXC8, SIN3A, TIA1, TWIST1, MTA2, GABPA, PKIG, HDAC10, SMARCE1, TRIM33, ASB1, SMARCA2, EIF2AK4, SMARCA4, CAV1, ENPP1, SNX6, TAF9B, CALR, HEXIM1, DRAP1, TCF4, TCF25, RUNX2, S100A11, CD276, SMAD3, SNW1, UBP1, HDAC5, PSMC5, HDAC1, TSC1, NEDD4, UBA3, SMARCC2, DNMT1, RBPJ, COPS2, RSF1, TSG101, ZNF202, CTCF, ZEB2, NFKB1, ZEB1, SAP30, PRMT…	2037	242	4909	1.21492	1	0.178746	6.68767
GOTERM_BP_FAT	GO:0009890~negative regulation of biosynthetic process	124	4.42541	0.0048903	MEF2C, SRP14, JDP2, CBX3, CBX5, CITED2, CTNNB1, KDM1A, EIF4EBP1, HOXC8, SIN3A, TIA1, TWIST1, MTA2, GABPA, PKIG, HDAC10, SMARCE1, TRIM33, ASB1, SMARCA2, EIF2AK4, SMARCA4, CAV1, ENPP1, SNX6, TAF9B, CALR, HEXIM1, DRAP1, ITGAV, TCF4, TCF25, RUNX2, S100A11, CD276, SMAD3, SNW1, UBP1, HDAC5, PSMC5, HDAC1, TSC1, NEDD4, SMARCC2, UBA3, DNMT1, RBPJ, COPS2, RSF1, TSG101, ZNF202, CTCF, ZEB2, NFKB1, ZEB1, SAP3…	2037	248	4909	1.20496	1	0.224023	8.73814
GOTERM_BP_FAT	GO:0016481~negative regulation of transcription	104	3.71163	0.00712442	MEF2C, JDP2, CBX3, CITED2, CTNNB1, CBX5, KDM1A, HOXC8, SIN3A, TWIST1, MTA2, GABPA, PKIG, HDAC10, SMARCE1, TRIM33, SMARCA2, SMARCA4, SNX6, TAF9B, CALR, DRAP1, HEXIM1, TCF4, TCF25, RUNX2, SMAD3, SNW1, UBP1, HDAC5, PSMC5, HDAC1, NEDD4, UBA3, SMARCC2, DNMT1, RBPJ, COPS2, RSF1, TSG101, NFKB1, ZNF202, CTCF, ZEB2, ZEB1, SAP30, PRMT6, LRRFIP1, NR2F2, ZNF496, KDM5B, NFX1, KHDRBS1, ZNF281, SP100, ARID5B, L…	2037	206	4909	1.21666	1	0.28834	12.485
GOTERM_BP_FAT	GO:0051172~negative regulation of nitrogen compound metabolic process	114	4.06852	0.00832923	MEF2C, JDP2, CBX3, CBX5, CITED2, CTNNB1, KDM1A, HOXC8, SIN3A, TWIST1, MTA2, GABPA, PKIG, HDAC10, SMARCE1, TRIM33, ATPIF1, SMARCA2, SMARCA4, CAV1, SNX6, TAF9B, CALR, RPS26, DRAP1, HEXIM1, NPM1, TCF4, TCF25, RUNX2, S100A11, SMAD3, SNW1, UBP1, HDAC5, PSMC5, HDAC1, NEDD4, UBA3, SMARCC2, DNMT1, RBPJ, COPS2, RSF1, TSG101, MLH1, ZNF202, CTCF, ZEB2, NFKB1, ZEB1, RPS3, SAP30, PRMT6, LRRFIP1, NR2F2, ZNF496…	2037	229	4909	1.1997	1	0.322251	14.4447
GOTERM_BP_FAT	GO:0045934~negative regulation of nucleobase, nucleoside, nucleotide and nucleic acid metabolic process	112	3.99714	0.0089568	MEF2C, JDP2, CBX3, CBX5, CITED2, CTNNB1, KDM1A, HOXC8, SIN3A, TWIST1, MTA2, GABPA, PKIG, HDAC10, SMARCE1, TRIM33, ATPIF1, SMARCA2, SMARCA4, SNX6, TAF9B, CALR, RPS26, DRAP1, HEXIM1, NPM1, TCF4, TCF25, RUNX2, S100A11, SMAD3, SNW1, UBP1, HDAC5, PSMC5, HDAC1, NEDD4, UBA3, SMARCC2, DNMT1, RBPJ, COPS2, RSF1, TSG101, MLH1, ZNF202, CTCF, ZEB2, NFKB1, ZEB1, RPS3, SAP30, PRMT6, LRRFIP1, NR2F2, ZNF496, KDM5…	2037	225	4909	1.1996	1	0.329963	15.4489
GOTERM_BP_FAT	GO:0000122~negative regulation of transcription from RNA polymerase II promoter	61	2.17702	0.0123457	MEF2C, JDP2, NFKB1, ZNF202, ZEB1, CITED2, CTNNB1, KDM1A, SAP30, HOXC8, SIN3A, NR2F2, ZNF496, NFX1, TWIST1, ZNF281, SP100, MTA2, GABPA, PKIG, HDAC10, TP53, RB1, RBBP7, MBD2, NRIP1, CTNNBIP1, NCOA2, BPTF, MDM2, ZFPM2, MDM4, LCOR, NSD1, SMARCA2, SMARCA4, ZMYND11, GLIS3, MTDH, TAF9B, CALR, SORBS3, HEXIM1, DRAP1, SUPT4H1, TCF4, TCF25, ENO1, ZBTB7A, JARID2, TRIM28, TRIM27, SMAD3, SNAI2, WWTR1, HDAC5, H…	2037	115	4909	1.2783	1	0.402004	20.682
GOTERM_MF_FAT	GO:0016564~transcription repressor activity	78	2.78373	0.0123897	COPS2, JDP2, ELF1, RSF1, TSG101, HIRA, CBX3, NFKB1, CTCF, ZEB1, YBX1, CBX5, CITED2, HOXC6, SAP30, KDM1A, HOXC8, SIN3A, LRRFIP1, NR2F2, KDM5B, KHDRBS1, ZNF281, SP100, ZNF282, MTA2, YY1, LDB1, ARID5B, HDAC10, SF1, UBE2I, RB1, SPEN, IFI16, RBBP7, MBD2, NRIP1, NCOA2, NAB2, MNT, MDM2, ZFPM2, NSD1, SBNO2, BCLAF1, TAF9B, PML, CALR, TCF7L2, CIR1, DRAP1, HEXIM1, NMRAL1, GATAD2A, TCF4, APEX1, ENO1, ZNF263,…	1942	151	4649	1.2366	1	0.431892	18.5779
Annotation Cluster 26	Enrichment Score: 2.4153813782095956
Category	Term	Count	%	PValue	Genes	List Total	Pop Hits	Pop Total	Fold Enrichment	Bonferroni	Benjamini	FDR
GOTERM_MF_FAT	GO:0008094~DNA-dependent ATPase activity	19	0.678087	0.000396545	XRCC5, DHX9, XRCC6, G3BP1, GTF2H3, CDK7, GTF2H1, MNAT1, RECQL, RFC4, CHD1L, BPTF, CHD2, RUVBL2, SMARCA1, MYO18A, SMARCA2, SMARCA4, ERCC2	1942	23	4649	1.97759	0.427448	0.0390494	0.651712
GOTERM_MF_FAT	GO:0003678~DNA helicase activity	14	0.499643	0.00871935	XRCC5, DHX9, XRCC6, G3BP1, INO80, MCM6, SETX, ATRX, RECQL, CHD1L, CHD2, RUVBL2, RUVBL1, ERCC2	1942	18	4649	1.86194	0.999996	0.366214	13.4434
GOTERM_MF_FAT	GO:0004003~ATP-dependent DNA helicase activity	9	0.321199	0.0164089	XRCC5, RECQL, DHX9, CHD1L, G3BP1, XRCC6, CHD2, RUVBL2, ERCC2	1942	10	4649	2.15453	1	0.516617	23.8716
Annotation Cluster 27	Enrichment Score: 2.3651767069435996
Category	Term	Count	%	PValue	Genes	List Total	Pop Hits	Pop Total	Fold Enrichment	Bonferroni	Benjamini	FDR
GOTERM_CC_FAT	GO:0016591~DNA-directed RNA polymerase II, holoenzyme	28	0.999286	2.94082e-05	POLR2H, SUPT3H, POLR2L, TADA3, SHFM1, TAF9B, CDC73, TRRAP, INTS3, POLR2A, INTS9, INTS8, GTF2A1, INTS7, GTF2A2, INTS6, LEO1, TBPL1, ERCC2, TAF2, TAF6, TP53, GTF2H3, CDK7, GTF2H1, MNAT1, TAF12, GTF2F1	1880	36	4615	1.90928	0.0206349	0.0011577	0.044416
GOTERM_BP_FAT	GO:0006352~transcription initiation	28	0.999286	0.000758778	POLR2H, RSF1, POLR2L, TAF9B, MED24, MED23, POLR2A, MAZ, GTF2A1, GTF2A2, MYC, NAT14, TBPL1, ERCC2, TAF2, TAF6, GTF2H3, CDK7, GTF2H1, MNAT1, MED4, TAF12, PTRF, MED16, MED17, GTF2F1, THRAP3, SMARCA5	2037	40	4909	1.68694	0.956794	0.0586297	1.40583
GOTERM_BP_FAT	GO:0006367~transcription initiation from RNA polymerase II promoter	22	0.785153	0.00145098	TAF2, POLR2H, POLR2L, TAF6, MED24, GTF2H3, MED23, CDK7, POLR2A, GTF2H1, MNAT1, MED4, MAZ, TAF12, GTF2A1, MED16, MED17, GTF2F1, GTF2A2, THRAP3, TBPL1, ERCC2	2037	30	4909	1.76727	0.997546	0.092385	2.67198
GOTERM_BP_FAT	GO:0006354~RNA elongation	17	0.606709	0.0470245	POLR2H, POLR2L, TAF6, ELL, GTF2H3, CDK7, POLR2A, GTF2H1, MNAT1, TAF12, GTF2A1, GTF2F1, GTF2A2, TCEA1, TCEA2, SUPT4H1, ERCC2	2037	27	4909	1.51735	1	0.761704	59.2775
KEGG_PATHWAY	hsa03022:Basal transcription factors	10	0.356888	0.0592197	TAF2, TAF12, GTF2A1, TAF6, GTF2F1, GTF2A2, TAF9B, GTF2H3, TBPL1, GTF2H1	826	14	2054	1.7762	0.999988	0.529	53.0162
GOTERM_BP_FAT	GO:0006368~RNA elongation from RNA polymerase II promoter	15	0.535332	0.071434	POLR2H, POLR2L, TAF6, ELL, GTF2H3, CDK7, POLR2A, GTF2H1, MNAT1, TAF12, GTF2A1, GTF2F1, GTF2A2, SUPT4H1, ERCC2	2037	24	4909	1.5062	1	0.849465	74.9015
Annotation Cluster 28	Enrichment Score: 2.1615185122147316
Category	Term	Count	%	PValue	Genes	List Total	Pop Hits	Pop Total	Fold Enrichment	Bonferroni	Benjamini	FDR
INTERPRO	IPR013026:Tetratricopeptide region	31	1.10635	0.000470248	BBS4, FKBP8, CRNKL1, STIP1, TTC27, TTC8, TTC5, TTC3, AIP, ZFC3H1, NPHP3, KLC1, P4HA1, GPSM1, RANBP2, OGT, TOMM34, TTC7A, ZC3H7B, TTC37, TANC1, CDC23, SUGT1, CDC27, RPAP3, IFIT1, TOMM70A, PPID, IFIT5, TMTC3, PPP5C	2407	45	5842	1.67199	0.722834	0.192536	0.834495
INTERPRO	IPR001440:Tetratricopeptide TPR-1	27	0.963597	0.00061161	BBS4, FKBP8, TTC7A, ZC3H7B, TTC37, TANC1, CDC23, TTC27, STIP1, TTC8, TTC5, SUGT1, CDC27, TTC3, RPAP3, NPHP3, IFIT1, KLC1, TOMM70A, IFIT5, PPID, GPSM1, TMTC3, RANBP2, OGT, TOMM34, PPP5C	2407	38	5842	1.72451	0.811561	0.212133	1.08407
INTERPRO	IPR019734:Tetratricopeptide repeat	29	1.03498	0.00126801	BBS4, FKBP8, STIP1, TTC27, TTC8, TTC5, TTC3, AIP, NPHP3, KLC1, P4HA1, GPSM1, OGT, RANBP2, TOMM34, TTC7A, ZC3H7B, TTC37, TANC1, CDC23, SUGT1, CDC27, RPAP3, IFIT1, TOMM70A, PPID, IFIT5, TMTC3, PPP5C	2407	43	5842	1.63687	0.968612	0.29258	2.23517
SMART	SM00028:TPR	29	1.03498	0.00198785	BBS4, FKBP8, STIP1, TTC27, TTC8, TTC5, TTC3, AIP, NPHP3, KLC1, P4HA1, GPSM1, OGT, RANBP2, TOMM34, TTC7A, ZC3H7B, TTC37, TANC1, CDC23, SUGT1, CDC27, RPAP3, IFIT1, TOMM70A, PPID, IFIT5, TMTC3, PPP5C	1365	42	3133	1.58481	0.550632	0.124814	2.73923
UP_SEQ_FEATURE	repeat:TPR 5	19	0.678087	0.00645067	BBS4, TTC7A, TTC37, CDC23, STIP1, TTC27, TTC8, CDC27, ZFC3H1, RPAP3, NPHP3, IFIT1, KLC1, TOMM70A, IFIT5, GPSM1, TMTC3, OGT, TOMM34	2621	27	6370	1.71026	1	0.921056	11.7742
UP_SEQ_FEATURE	repeat:TPR 4	23	0.820842	0.00763188	BBS4, ANAPC5, TTC7A, TTC37, CDC23, STIP1, TTC27, TTC8, TTC5, CDC27, TTC3, ZFC3H1, RPAP3, INTS8, NPHP3, IFIT1, KLC1, TOMM70A, IFIT5, GPSM1, TMTC3, OGT, TOMM34	2621	35	6370	1.5971	1	0.918306	13.7825
UP_SEQ_FEATURE	repeat:TPR 3	30	1.07066	0.00795013	BBS4, FKBP8, STIP1, TTC27, TTC8, TTC5, TTC3, ZFC3H1, INTS8, NPHP3, KLC1, GPSM1, OGT, TOMM34, TTC7A, ANAPC5, ZC3H7A, ZC3H7B, TTC37, TANC1, CDC23, SUGT1, CDC27, RPAP3, IFIT1, TOMM70A, PPID, IFIT5, TMTC3, PPP5C	2621	49	6370	1.48798	1	0.915609	14.3162
UP_SEQ_FEATURE	repeat:TPR 7	16	0.571021	0.00942428	RPAP3, BBS4, NPHP3, IFIT1, TTC7A, TOMM70A, IFIT5, TTC37, GPSM1, CDC23, STIP1, TMTC3, TTC27, TTC8, OGT, CDC27	2621	22	6370	1.76754	1	0.920576	16.7474
INTERPRO	IPR011990:Tetratricopeptide-like helical	37	1.32049	0.010288	BBS4, FKBP8, CRNKL1, NAPG, TTC27, STIP1, TTC8, TTC5, CLTC, TTC3, AIP, ZFC3H1, NPHP3, KLC1, P4HA1, GPSM1, RANBP2, OGT, TOMM34, PDCD11, TTC7A, ANAPC5, ZC3H7A, ZC3H7B, TTC37, TANC1, CDC23, SUGT1, CDC27, RPAP3, IFIT1, TOMM70A, IFIT5, PPID, TMTC3, COPE, PPP5C	2407	64	5842	1.40316	1	0.706704	16.8266
UP_SEQ_FEATURE	repeat:TPR 6	18	0.642398	0.0107225	BBS4, TTC7A, TTC37, CDC23, TTC27, STIP1, TTC8, CDC27, RPAP3, NPHP3, IFIT1, KLC1, TOMM70A, IFIT5, GPSM1, TMTC3, OGT, TOMM34	2621	26	6370	1.68256	1	0.928884	18.8342
UP_SEQ_FEATURE	repeat:TPR 9	12	0.428266	0.0118231	BBS4, NPHP3, IFIT1, TTC7A, TOMM70A, TTC37, GPSM1, CDC23, STIP1, TMTC3, OGT, CDC27	2621	15	6370	1.9443	1	0.939174	20.5644
UP_SEQ_FEATURE	repeat:TPR 8	14	0.499643	0.0149333	BBS4, NPHP3, IFIT1, TTC7A, TOMM70A, IFIT5, TTC37, GPSM1, CDC23, STIP1, TMTC3, TTC8, OGT, CDC27	2621	19	6370	1.7908	1	0.952797	25.2667
UP_SEQ_FEATURE	repeat:TPR 1	32	1.14204	0.0157377	BBS4, FKBP8, PTPN23, STIP1, TTC27, TTC8, TTC5, TTC3, AIP, ZFC3H1, INTS8, NPHP3, KLC1, GPSM1, OGT, TOMM34, TTC7A, ANAPC5, ZC3H7A, ZC3H7B, TTC37, TANC1, CDC23, SUGT1, CDC27, RPAP3, IFIT1, TOMM70A, PPID, IFIT5, TMTC3, PPP5C	2621	55	6370	1.41403	1	0.950777	26.4392
UP_SEQ_FEATURE	repeat:TPR 2	32	1.14204	0.0157377	BBS4, FKBP8, PTPN23, STIP1, TTC27, TTC8, TTC5, TTC3, AIP, ZFC3H1, INTS8, NPHP3, KLC1, GPSM1, OGT, TOMM34, TTC7A, ANAPC5, ZC3H7A, ZC3H7B, TTC37, TANC1, CDC23, SUGT1, CDC27, RPAP3, IFIT1, TOMM70A, PPID, IFIT5, TMTC3, PPP5C	2621	55	6370	1.41403	1	0.950777	26.4392
SP_PIR_KEYWORDS	tpr repeat	34	1.21342	0.0353821	BBS4, FKBP8, PTPN23, STIP1, TTC27, TTC8, TTC5, TTC3, AIP, ZFC3H1, INTS8, NPHP3, KLC1, P4HA1, GPSM1, RANBP2, OGT, TOMM34, TTC7A, ANAPC5, ZC3H7A, ZC3H7B, TTC37, TANC1, CDC23, SUGT1, CDC27, RPAP3, IFIT1, TOMM70A, PPID, IFIT5, TMTC3, PPP5C	2621	62	6373	1.33341	1	0.322064	41.7227
UP_SEQ_FEATURE	repeat:TPR 10	7	0.249822	0.057063	BBS4, NPHP3, IFIT1, TOMM70A, TTC37, TMTC3, OGT	2621	8	6370	2.12657	1	0.998532	67.9328
Annotation Cluster 29	Enrichment Score: 2.014392549473661
Category	Term	Count	%	PValue	Genes	List Total	Pop Hits	Pop Total	Fold Enrichment	Bonferroni	Benjamini	FDR
INTERPRO	IPR006649:Like-Sm ribonucleoprotein, eukaryotic and archaea-type, core	10	0.356888	0.00212925	LSMD1, SNRPN, LSM7, SNRPD1, LSM4, SNRPD2, LSM3, LSM1, SNRPE, SNRPG	2407	10	5842	2.42709	0.997017	0.360642	3.72634
SMART	SM00651:Sm	10	0.356888	0.00337493	LSMD1, SNRPN, LSM7, SNRPD1, LSM4, SNRPD2, LSM3, LSM1, SNRPE, SNRPG	1365	10	3133	2.29524	0.743086	0.176462	4.60915
GOTERM_CC_FAT	GO:0030532~small nuclear ribonucleoprotein complex	12	0.428266	0.00454998	PRPF31, DDX23, SNRPN, SNRNP200, SNRPD1, SLU7, LSM4, SNRPD2, PHF5A, SNRPE, SF3B3, SNRPG	1880	14	4615	2.1041	0.960573	0.0776518	6.65714
INTERPRO	IPR001163:Like-Sm ribonucleoprotein, core	10	0.356888	0.00740472	LSMD1, SNRPN, LSM7, SNRPD1, LSM4, SNRPD2, LSM3, LSM1, SNRPE, SNRPG	2407	11	5842	2.20644	1	0.696587	12.4022
BIOCARTA	h_smPathway:Spliceosomal Assembly	6	0.214133	0.349968	U2AF2, U2AF1, SNRPD1, SNRPD2, SNRPE, SNRPG	309	9	703	1.51672	1	0.970596	99.6436
Annotation Cluster 30	Enrichment Score: 2.006715556194643
Category	Term	Count	%	PValue	Genes	List Total	Pop Hits	Pop Total	Fold Enrichment	Bonferroni	Benjamini	FDR
GOTERM_CC_FAT	GO:0015630~microtubule cytoskeleton	128	4.56817	0.000196758	SEPT2, VAPA, DYNC2LI1, CEP78, CBX3, CTNNB1, KIF13A, APP, IFT20, INCENP, KIFAP3, DYNC2H1, PPP4C, ROCK1, VPS41, DCTN3, PCM1, DCTN1, TNKS2, NME2, NDEL1, CEP350, RCC2, NME1, CC2D2A, FLII, CLIP1, HSPB1, PDE4DIP, TNFAIP3, MAP7D1, SEPT7, SEPT9, BBS4, ARPC4, CEP164, TTC8, NPHP3, PEA15, TUBB, MACF1, BLOC1S2, KATNA1, CEP170, NPM1, SKA2, CLASP1, TNKS, EMD, CKAP2, DHX9, KIF3B, KIF3A, CKAP5, SMEK1, CDC27, ATM…	1880	245	4615	1.2825	0.13022	0.00632155	0.296819
GOTERM_CC_FAT	GO:0005874~microtubule	55	1.96288	0.0367553	LZTS2, VAPA, DYNC2LI1, SPAG16, KIF13A, SPRY2, NDE1, DYNLL1, INCENP, DYNC2H1, SNTB2, DYNC1H1, TUBA1A, ZW10, KIF2A, ARHGEF2, DYNLT3, TBCE, DYNLT1, VPS41, DCTN1, KIF1C, SS18, EML1, NDEL1, TBCB, RCC2, CLIP1, MAPRE2, MAPRE1, WDR44, DYNC1I2, SEPT9, HAUS1, ARPC4, NUMA1, TUBB, CEP57, KLC1, KATNA1, CEP170, ODF2, CLASP1, SKA2, PAFAH1B1, CKAP2, KIF3B, KIF3A, MAP1A, MAP1B, CDC27, MAP1S, RASSF1, CALM3, MAP4, …	1880	109	4615	1.23865	1	0.308406	43.2038
SP_PIR_KEYWORDS	microtubule	45	1.606	0.132008	LZTS2, DYNC2LI1, HAUS1, ARPC4, KIF13A, SPRY2, NDE1, TUBB, DYNLL1, CEP57, KLC1, INCENP, KATNA1, CEP170, DYNC2H1, SNTB2, CLASP1, ODF2, PAFAH1B1, SKA2, DYNC1H1, TUBA1A, EMD, KIF2A, CKAP2, ARHGEF2, KIF3B, KIF3A, MAP1A, MAP1B, DYNLT3, DYNLT1, DCTN1, KIF1C, EML1, NDEL1, TBCB, RCC2, MAP1S, RASSF1, CLIP1, MAP4, MAPRE2, MAPRE1, DYNC1I2	2621	93	6373	1.17654	1	0.693918	88.0215
Annotation Cluster 31	Enrichment Score: 1.881377661189243
Category	Term	Count	%	PValue	Genes	List Total	Pop Hits	Pop Total	Fold Enrichment	Bonferroni	Benjamini	FDR
GOTERM_CC_FAT	GO:0030117~membrane coat	22	0.785153	0.000528566	COPZ2, SEC23A, COPA, SEC24A, SEC31A, AP4E1, AP3S1, CLTC, COPB2, AP1S1, AP2B1, PICALM, COPB1, ARCN1, NECAP2, AP3D1, SEC24C, SEC24D, SEC23B, COPE, AP2M1, AP3B1	1880	29	4615	1.86225	0.312609	0.0137875	0.795504
GOTERM_CC_FAT	GO:0048475~coated membrane	22	0.785153	0.000528566	COPZ2, SEC23A, COPA, SEC24A, SEC31A, AP4E1, AP3S1, CLTC, COPB2, AP1S1, AP2B1, PICALM, COPB1, ARCN1, NECAP2, AP3D1, SEC24C, SEC24D, SEC23B, COPE, AP2M1, AP3B1	1880	29	4615	1.86225	0.312609	0.0137875	0.795504
GOTERM_CC_FAT	GO:0030120~vesicle coat	16	0.571021	0.000783102	COPZ2, SEC23A, COPA, SEC31A, SEC24A, AP4E1, CLTC, COPB2, AP1S1, COPB1, ARCN1, NECAP2, SEC24C, SEC24D, SEC23B, COPE	1880	19	4615	2.06719	0.426179	0.0189707	1.17647
GOTERM_CC_FAT	GO:0030660~Golgi-associated vesicle membrane	11	0.392577	0.00894434	COPZ2, COPB2, COPA, AP1S1, AP4E1, COPB1, ARCN1, GJA1, GOLGA5, CLTC, COPE	1880	13	4615	2.07713	0.998288	0.129319	12.6917
GOTERM_CC_FAT	GO:0012506~vesicle membrane	32	1.14204	0.0329731	COPZ2, COPA, CLCN3, SEC24A, SEC31A, AP4E1, GRB2, GJA1, GIPC1, ANPEP, CLTC, COPB2, AP1S1, AP2B1, COPB1, CAMK2D, NECAP2, DLG4, GOLGA5, SEC24C, SEC24D, AP2M1, SEC23A, PICK1, APPL1, LAMP2, ULK1, ARCN1, RAB5A, MDM2, COPE, SEC23B	1880	58	4615	1.35437	1	0.287945	39.74
GOTERM_CC_FAT	GO:0030659~cytoplasmic vesicle membrane	27	0.963597	0.0534197	COPZ2, COPA, SEC24A, SEC31A, AP4E1, GJA1, CLTC, COPB2, AP2B1, AP1S1, COPB1, NECAP2, DLG4, CAMK2D, GOLGA5, SEC24C, SEC24D, AP2M1, SEC23A, PICK1, LAMP2, ULK1, ARCN1, RAB5A, MDM2, COPE, SEC23B	1880	49	4615	1.35264	1	0.381551	56.366
GOTERM_CC_FAT	GO:0030662~coated vesicle membrane	17	0.606709	0.0818044	COPZ2, SEC23A, COPA, SEC24A, SEC31A, AP4E1, CLTC, COPB2, AP1S1, COPB1, ARCN1, NECAP2, SEC24C, GOLGA5, SEC24D, SEC23B, COPE	1880	29	4615	1.43901	1	0.485695	72.4524
GOTERM_CC_FAT	GO:0030135~coated vesicle	31	1.10635	0.188486	TGOLN2, COPZ2, COPA, SEC24A, SEC31A, KIAA0368, AP4E1, PPT1, GIPC1, CLTC, RABAC1, COPB2, AP1S1, PICALM, COPB1, GOPC, NECAP2, SPG21, GOLGA5, SEC24C, CLINT1, SEC24D, SEC23A, ATP7A, LRP1, RAB35, ARCN1, RAB5A, YIPF5, COPE, SEC23B	1880	64	4615	1.18904	1	0.730292	95.7362
GOTERM_CC_FAT	GO:0044433~cytoplasmic vesicle part	34	1.21342	0.219847	COPZ2, COPA, SEC24A, SEC31A, AP4E1, CLU, GJA1, CLTC, TIMP1, COPB2, AP1S1, APP, AP2B1, COPB1, CAMK2D, NECAP2, DLG4, GOLGA5, SEC24C, SEC24D, AP2M1, FN1, SEC23A, PICK1, ACTN1, SPARC, LAMP2, ULK1, VEGFA, ARCN1, RAB5A, MDM2, COPE, SEC23B	1880	72	4615	1.15921	1	0.769345	97.6491
Annotation Cluster 32	Enrichment Score: 1.8365934641380055
Category	Term	Count	%	PValue	Genes	List Total	Pop Hits	Pop Total	Fold Enrichment	Bonferroni	Benjamini	FDR
GOTERM_BP_FAT	GO:0006338~chromatin remodeling	23	0.820842	0.000395903	RSF1, INO80, CBX3, RB1, ARID1B, HDAC5, CHRAC1, CHD1L, BAZ1B, BPTF, HDAC1, SMARCB1, SMARCC1, SMARCC2, SMARCA5, PBRM1, ACTL6A, SUPT4H1, SMARCA1, BAZ2A, SMARCA2, SMARCA4, SUPT6H	2037	30	4909	1.8476	0.80582	0.0365641	0.735861
BIOCARTA	h_hSWI-SNFpathway:Chromatin Remodeling by hSWI/SNF ATP-dependent Complexes	10	0.356888	0.0283847	GTF2A1, SMARCE1, SMARCB1, SMARCC1, GTF2F1, NF1, SMARCC2, NR3C1, SMARCA4, POLR2A	309	12	703	1.8959	0.999471	0.91912	31.3972
GOTERM_CC_FAT	GO:0070603~SWI/SNF-type complex	9	0.321199	0.0633106	SMARCE1, SMARCB1, SMARCC1, SMARCC2, ACTL6A, RB1, ARID1B, SMARCA2, SMARCA4	1880	12	4615	1.84109	1	0.424224	62.7684
GOTERM_CC_FAT	GO:0016514~SWI/SNF complex	9	0.321199	0.0633106	SMARCE1, SMARCB1, SMARCC1, SMARCC2, ACTL6A, RB1, ARID1B, SMARCA2, SMARCA4	1880	12	4615	1.84109	1	0.424224	62.7684
Annotation Cluster 33	Enrichment Score: 1.8049118136800701
Category	Term	Count	%	PValue	Genes	List Total	Pop Hits	Pop Total	Fold Enrichment	Bonferroni	Benjamini	FDR
INTERPRO	IPR019781:WD40 repeat, subgroup	56	1.99857	0.00452381	COPA, SEC31A, HIRA, WDR82, SPAG16, DCAF13, COPB2, WDR37, IFT122, SEH1L, NUP37, WDR35, WDR34, IFT80, TLE4, RBBP7, RFWD2, DCAF4, SMU1, ARPC1B, DCAF6, RFWD3, EML1, GNB2, MED16, WRAP53, THOC6, WDR41, WDR44, NUP43, DYNC1I2, WDR46, FZR1, DMWD, LLGL1, PRPF19, FBXW9, EIF3I, PAFAH1B1, NBEAL1, BUB3, PPWD1, WDFY3, WDFY2, WDFY1, PWP1, WSB1, CORO1C, CORO1B, NEDD1, WDR26, WDR27, WDR4, SEC13, WDR1, GNB2L1	2407	101	5842	1.34571	0.999996	0.586665	7.76029
INTERPRO	IPR017986:WD40 repeat, region	55	1.96288	0.00799262	COPA, SEC31A, HIRA, WDR82, SPAG16, DCAF13, COPB2, WDR37, IFT122, SEH1L, NUP37, WDR35, WDR34, IFT80, TLE4, RBBP7, VPS8, RFWD2, DCAF4, SMU1, ARPC1B, DCAF6, EML1, GNB2, MED16, WRAP53, THOC6, WDR41, WDR44, NUP43, DYNC1I2, WDR46, FZR1, DMWD, PRPF19, FBXW9, EIF3I, PAFAH1B1, NBEAL1, BUB3, PPWD1, WDFY3, WDFY2, WDFY1, PWP1, WSB1, CORO1C, CORO1B, NEDD1, WDR26, WDR27, WDR4, SEC13, WDR1, GNB2L1	2407	101	5842	1.32168	1	0.684053	13.322
INTERPRO	IPR019782:WD40 repeat 2	53	1.89151	0.00854554	COPA, SEC31A, HIRA, WDR82, SPAG16, DCAF13, COPB2, WDR37, IFT122, SEH1L, NUP37, WDR35, IFT80, TLE4, RBBP7, VPS8, RFWD2, DCAF4, ARPC1B, SMU1, EML1, GNB2, MED16, WRAP53, THOC6, WDR41, WDR44, NUP43, WDR46, FZR1, DMWD, LLGL1, PRPF19, FBXW9, EIF3I, PAFAH1B1, NBEAL1, BUB3, PPWD1, WDFY3, WDFY2, WDFY1, PWP1, WSB1, CORO1C, CORO1B, NEDD1, WDR26, WDR27, WDR4, SEC13, WDR1, GNB2L1	2407	97	5842	1.32614	1	0.689826	14.1787
SP_PIR_KEYWORDS	wd repeat	58	2.06995	0.00891985	COPA, SEC31A, HIRA, WDR82, SPAG16, DCAF13, COPB2, WDR37, IFT122, WDR73, SEH1L, NUP37, WDR35, WDR34, IFT80, TLE4, RBBP7, VPS8, RFWD2, DCAF4, SMU1, ARPC1B, DCAF6, RFWD3, EML1, GNB2, MED16, WRAP53, THOC6, WDR41, WDR44, NUP43, DYNC1I2, WDR46, FZR1, DMWD, LLGL1, PRPF19, FBXW9, EIF3I, PAFAH1B1, NBEAL1, BUB3, PPWD1, WDFY3, WDFY2, WDFY1, PWP1, WSB1, CORO1C, CORO1B, NEDD1, WDR26, WDR27, WDR4, SEC13, WDR1,…	2621	108	6373	1.30581	0.997507	0.110888	12.5673
INTERPRO	IPR001680:WD40 repeat	58	2.06995	0.009263	COPA, SEC31A, HIRA, WDR82, SPAG16, DCAF13, COPB2, WDR37, IFT122, WDR73, SEH1L, NUP37, WDR35, WDR34, IFT80, TLE4, RBBP7, RFWD2, DCAF4, SMU1, ARPC1B, DCAF6, RFWD3, EML1, GNB2, MED16, WRAP53, THOC6, WDR41, WDR44, NUP43, DYNC1I2, WDR46, FZR1, DMWD, LLGL1, PRPF19, FBXW9, NUP214, EIF3I, PAFAH1B1, NBEAL1, BUB3, PPWD1, WDFY3, WDFY2, WDFY1, PWP1, WSB1, CORO1C, CORO1B, NEDD1, WDR26, WDR27, WDR4, SEC13, WDR…	2407	108	5842	1.30344	1	0.701479	15.2784
UP_SEQ_FEATURE	repeat:WD 1	57	2.03426	0.0118942	COPA, SEC31A, HIRA, WDR82, SPAG16, DCAF13, COPB2, WDR37, IFT122, WDR73, SEH1L, NUP37, WDR35, WDR34, IFT80, TLE4, RBBP7, RFWD2, DCAF4, SMU1, ARPC1B, DCAF6, RFWD3, EML1, GNB2, MED16, WRAP53, THOC6, WDR41, WDR44, NUP43, DYNC1I2, WDR46, FZR1, DMWD, LLGL1, PRPF19, FBXW9, EIF3I, PAFAH1B1, NBEAL1, BUB3, PPWD1, WDFY3, WDFY2, WDFY1, PWP1, WSB1, CORO1C, CORO1B, NEDD1, WDR26, WDR27, WDR4, SEC13, WDR1, GNB2L1	2621	107	6370	1.29468	1	0.933353	20.675
UP_SEQ_FEATURE	repeat:WD 2	57	2.03426	0.0118942	COPA, SEC31A, HIRA, WDR82, SPAG16, DCAF13, COPB2, WDR37, IFT122, WDR73, SEH1L, NUP37, WDR35, WDR34, IFT80, TLE4, RBBP7, RFWD2, DCAF4, SMU1, ARPC1B, DCAF6, RFWD3, EML1, GNB2, MED16, WRAP53, THOC6, WDR41, WDR44, NUP43, DYNC1I2, WDR46, FZR1, DMWD, LLGL1, PRPF19, FBXW9, EIF3I, PAFAH1B1, NBEAL1, BUB3, PPWD1, WDFY3, WDFY2, WDFY1, PWP1, WSB1, CORO1C, CORO1B, NEDD1, WDR26, WDR27, WDR4, SEC13, WDR1, GNB2L1	2621	107	6370	1.29468	1	0.933353	20.675
UP_SEQ_FEATURE	repeat:WD 6	40	1.42755	0.0168141	COPA, FZR1, SEC31A, HIRA, WDR82, LLGL1, SPAG16, PRPF19, FBXW9, DCAF13, COPB2, WDR37, IFT122, SEH1L, PAFAH1B1, WDFY2, WDFY1, IFT80, TLE4, RBBP7, RFWD2, WSB1, ARPC1B, SMU1, NEDD1, DCAF6, EML1, WDR26, GNB2, WRAP53, WDR27, THOC6, SEC13, WDR41, WDR1, WDR44, GNB2L1, NUP43, DYNC1I2, WDR46	2621	72	6370	1.35021	1	0.955777	27.9809
UP_SEQ_FEATURE	repeat:WD 4	53	1.89151	0.0174357	COPA, SEC31A, HIRA, WDR82, SPAG16, DCAF13, COPB2, WDR37, IFT122, SEH1L, NUP37, WDR35, WDR34, IFT80, TLE4, RBBP7, RFWD2, ARPC1B, SMU1, DCAF6, EML1, GNB2, MED16, WRAP53, THOC6, WDR41, WDR44, NUP43, DYNC1I2, WDR46, FZR1, DMWD, LLGL1, PRPF19, FBXW9, EIF3I, PAFAH1B1, BUB3, PPWD1, WDFY3, WDFY2, WDFY1, PWP1, WSB1, CORO1C, CORO1B, NEDD1, WDR26, WDR27, WDR4, SEC13, WDR1, GNB2L1	2621	100	6370	1.2881	1	0.952381	28.8571
INTERPRO	IPR019775:WD40 repeat, conserved site	58	2.06995	0.0184578	COPA, SEC31A, HIRA, WDR82, SPAG16, DCAF13, COPB2, WDR37, IFT122, WDR73, SEH1L, NUP37, WDR35, WDR34, IFT80, TLE4, RBBP7, VPS8, RFWD2, DCAF4, SMU1, ARPC1B, DCAF6, RFWD3, EML1, GNB2, MED16, WRAP53, THOC6, WDR41, WDR44, NUP43, DYNC1I2, WDR46, FZR1, DMWD, LLGL1, PRPF19, FBXW9, EIF3I, PAFAH1B1, NBEAL1, BUB3, PPWD1, WDFY3, WDFY2, WDFY1, PWP1, WSB1, CORO1C, CORO1B, NEDD1, WDR26, WDR27, WDR4, SEC13, WDR1,…	2407	111	5842	1.26821	1	0.837182	28.2455
UP_SEQ_FEATURE	repeat:WD 3	55	1.96288	0.0202172	COPA, SEC31A, HIRA, WDR82, SPAG16, DCAF13, COPB2, WDR37, IFT122, WDR73, SEH1L, NUP37, WDR35, WDR34, IFT80, TLE4, RBBP7, RFWD2, SMU1, ARPC1B, DCAF6, RFWD3, EML1, GNB2, MED16, WRAP53, THOC6, WDR41, WDR44, NUP43, DYNC1I2, WDR46, FZR1, DMWD, LLGL1, PRPF19, FBXW9, EIF3I, PAFAH1B1, BUB3, PPWD1, WDFY3, WDFY2, WDFY1, PWP1, WSB1, CORO1C, CORO1B, NEDD1, WDR26, WDR27, WDR4, SEC13, WDR1, GNB2L1	2621	105	6370	1.27305	1	0.961171	32.656
UP_SEQ_FEATURE	repeat:WD 5	49	1.74875	0.0202812	COPA, FZR1, SEC31A, HIRA, DMWD, WDR82, LLGL1, SPAG16, FBXW9, PRPF19, COPB2, DCAF13, WDR37, IFT122, SEH1L, PAFAH1B1, EIF3I, WDR35, WDR34, BUB3, WDFY3, WDFY2, WDFY1, IFT80, TLE4, RBBP7, PWP1, WSB1, RFWD2, SMU1, CORO1B, ARPC1B, DCAF6, NEDD1, EML1, WDR26, GNB2, MED16, WRAP53, WDR27, THOC6, SEC13, WDR41, WDR1, WDR44, GNB2L1, NUP43, WDR46, DYNC1I2	2621	92	6370	1.29444	1	0.958131	32.741
SMART	SM00320:WD40	58	2.06995	0.0310168	COPA, SEC31A, HIRA, WDR82, SPAG16, DCAF13, COPB2, WDR37, IFT122, WDR73, SEH1L, NUP37, WDR35, WDR34, IFT80, TLE4, RBBP7, RFWD2, DCAF4, SMU1, ARPC1B, DCAF6, RFWD3, EML1, GNB2, MED16, WRAP53, THOC6, WDR41, WDR44, NUP43, DYNC1I2, WDR46, FZR1, DMWD, LLGL1, PRPF19, FBXW9, NUP214, EIF3I, PAFAH1B1, NBEAL1, BUB3, PPWD1, WDFY3, WDFY2, WDFY1, PWP1, WSB1, CORO1C, CORO1B, NEDD1, WDR26, WDR27, WDR4, SEC13, WDR…	1365	108	3133	1.23263	0.999997	0.68383	35.5831
UP_SEQ_FEATURE	repeat:WD 7	28	0.999286	0.0582314	FZR1, SEC31A, HIRA, LLGL1, SPAG16, FBXW9, PRPF19, DCAF13, COPB2, WDR37, IFT122, PAFAH1B1, WDFY2, WDFY1, IFT80, TLE4, RBBP7, RFWD2, DCAF6, NEDD1, EML1, GNB2, WDR27, THOC6, WDR1, WDR44, GNB2L1, DYNC1I2	2621	51	6370	1.33432	1	0.998553	68.6933
INTERPRO	IPR015943:WD40/YVTN repeat-like	62	2.21271	0.0583107	COPA, PLXNA3, HIRA, WDR82, SPAG16, DCAF13, COPB2, WDR37, WDR73, IFT122, SEH1L, SEMA3C, NUP37, WDR35, WDR34, IFT80, PLXNB2, ANAPC4, TLE4, RBBP7, VPS8, RFWD2, DCAF4, SMU1, ARPC1B, DCAF6, RFWD3, EML1, GNB2, MED16, WRAP53, THOC6, WDR41, WDR44, NUP43, DYNC1I2, WDR46, FZR1, DMWD, LLGL1, PRPF19, FBXW9, NUP214, PAFAH1B1, EIF3I, NBEAL1, BUB3, PPWD1, WDFY3, WDFY2, WDFY1, PWP1, WSB1, CORO1C, CORO1B, NEDD1, …	2407	126	5842	1.19428	1	0.975886	65.7125
Annotation Cluster 34	Enrichment Score: 1.704782196447435
Category	Term	Count	%	PValue	Genes	List Total	Pop Hits	Pop Total	Fold Enrichment	Bonferroni	Benjamini	FDR
GOTERM_BP_FAT	GO:0007049~cell cycle	186	6.63812	0.000246654	ADCY3, S100A6, SEPT2, DBF4, RBM7, CTNNB1, CUL3, CUL5, APP, CDKN2A, TARDBP, INCENP, VPS4B, NUP37, H2AFX, TLK1, DNAJC2, RPS27A, STAG2, ZC3HC1, ANAPC5, RAN, ANAPC4, RINT1, SKP2, UBR2, SKP1, DCTN3, PPP1CB, DCTN1, RAD1, MAPK1, PPP1CA, RCC2, MAPK6, MAPK3, CLIP1, PELO, BIN3, AKAP8, SEPT7, NUP43, NEK6, SEPT8, SEPT9, PPP5C, BBS4, FZR1, DMWD, CEP164, CALR, ITGB1, PLAGL1, TUBB, NIPBL, MACF1, SMARCB1, KATNA1…	2037	368	4909	1.21806	0.639775	0.027218	0.459057
GOTERM_BP_FAT	GO:0022402~cell cycle process	142	5.06781	0.00102973	ADCY3, SEPT2, DBF4, RBM7, CTNNB1, CUL3, CUL5, APP, CDKN2A, INCENP, TARDBP, NUP37, H2AFX, DNAJC2, STAG2, RPS27A, ZC3HC1, ANAPC5, RAN, ANAPC4, SKP2, UBR2, SKP1, DCTN3, PPP1CB, DCTN1, RAD1, RCC2, CLIP1, AKAP8, NUP43, SEPT7, NEK6, PPP5C, BBS4, FZR1, CEP164, DMWD, CALR, ITGB1, PLAGL1, TUBB, NIPBL, MACF1, KATNA1, NPM1, PBRM1, SKA2, CLASP1, TNKS, UBE2D1, TCF3, TAF2, CKAP5, AK1, CDC23, SMAD3, TPD52L1, SU…	2037	279	4909	1.22655	0.985938	0.0697253	1.90329
GOTERM_BP_FAT	GO:0022403~cell cycle phase	101	3.60457	0.00548648	ADCY3, SEPT2, DBF4, RBM7, CUL3, APP, CUL5, CDKN2A, INCENP, TARDBP, H2AFX, NUP37, DNAJC2, STAG2, ZC3HC1, ANAPC5, RAN, ANAPC4, SKP2, UBR2, DCTN3, PPP1CB, DCTN1, RAD1, RCC2, CLIP1, AKAP8, NUP43, SEPT7, NEK6, PPP5C, FZR1, CEP164, DMWD, ITGB1, TUBB, NIPBL, KATNA1, PBRM1, TNKS, CLASP1, SKA2, TCF3, TAF2, CKAP5, CDC23, TPD52L1, SUGT1, CDC27, ATM, NEDD1, NOLC1, NBN, LZTS2, MLH1, MLH3, LATS1, LATS2, NDE1, …	2037	198	4909	1.2293	1	0.242473	9.75258
GOTERM_BP_FAT	GO:0000278~mitotic cell cycle	101	3.60457	0.00548648	SEPT2, DBF4, CUL3, APP, CUL5, CDKN2A, INCENP, TARDBP, NUP37, DNAJC2, STAG2, RPS27A, ZC3HC1, ANAPC5, RAN, ANAPC4, SKP2, SKP1, DCTN3, PPP1CB, DCTN1, RCC2, CLIP1, AKAP8, NUP43, SEPT7, NEK6, PPP5C, FZR1, CEP164, ITGB1, TUBB, NIPBL, KATNA1, PBRM1, TNKS, CLASP1, SKA2, UBE2D1, TCF3, TAF2, CKAP5, CDC23, TPD52L1, SUGT1, CDC27, PSMB8, NEDD1, PSMC6, PSMC5, NOLC1, PSMC3, PSMC2, UBA3, PSMC1, UBE2E1, LZTS2, LA…	2037	198	4909	1.2293	1	0.242473	9.75258
SP_PIR_KEYWORDS	cell cycle	110	3.92577	0.00868155	SEPT2, DBF4, CDKN2A, INCENP, VPS4B, NUP37, H2AFX, TLK1, STAG2, ZC3HC1, ANAPC5, RAN, RINT1, ANAPC4, DCTN3, PPP1CB, MAPK1, PPP1CA, MAPK6, RCC2, MAPK3, BIN3, PELO, NUP43, SEPT7, NEK6, SEPT9, FZR1, CEP164, NIPBL, SMARCB1, KATNA1, CLASP1, SKA2, TFDP1, CKAP2, CKAP5, CDC23, PCNP, SEPT10, ATM, SEPT11, NEDD1, RGS2, DMTF1, UBA3, KCTD11, CCNT2, NBN, SPIN1, LZTS2, TSG101, MLH1, LATS1, LATS2, NDE1, CEP250, SE…	2621	222	6373	1.2048	0.997072	0.110118	12.2517
GOTERM_BP_FAT	GO:0000279~M phase	80	2.8551	0.0096308	ADCY3, LZTS2, NBN, SEPT2, MLH1, RBM7, MLH3, LATS1, LATS2, NDE1, SEH1L, TARDBP, INCENP, NUP37, H2AFX, RANBP1, DYNC1H1, USP16, STAG2, ZW10, CCNK, ARHGEF2, ZC3HC1, ANAPC5, RAN, ANAPC4, UBR2, UBE2I, RB1, DCTN3, RAD50, DCTN1, RAD1, RCC2, CLIP1, MAPRE2, MAPRE1, AKAP8, RUVBL1, KPNA2, NUP43, SEPT7, NEK6, PPP5C, FZR1, CEP120, HSD3B7, HAUS1, CETN2, CEP164, DMWD, TUBB, NUMA1, NIPBL, KATNA1, PBRM1, PAFAH1B1,…	2037	155	4909	1.24383	1	0.344025	16.515
SP_PIR_KEYWORDS	cell division	64	2.28408	0.0611308	CCNT2, LZTS2, SEPT2, TSG101, LATS1, LATS2, CDC42, NDE1, SEH1L, INCENP, VPS4B, NUP37, USP16, STAG2, ZW10, CCNK, ARHGEF2, ZC3HC1, ANAPC5, RAN, ANAPC4, UBE2I, CDK7, DCTN3, CDK4, PPP1CB, ARL3, PPP1CA, RAB11FIP3, RCC2, PELO, MAPRE2, BIN3, MAPRE1, RUVBL1, NUP43, SEPT7, UBE2S, NEK6, SEPT9, FZR1, PARD3, HAUS1, CETN2, CEP164, KATNA1, PAFAH1B1, CLASP1, SKA2, BUB3, TERF1, CSNK1A1, PDS5A, CKAP5, CDC23, SEPT1…	2621	131	6373	1.18792	1	0.462371	61.1516
GOTERM_BP_FAT	GO:0051301~cell division	72	2.56959	0.0714202	CCNT2, LZTS2, SEPT2, TSG101, BCAR1, LATS1, LATS2, DSTN, CDC42, NDE1, CDKN2A, SEH1L, INCENP, VPS4B, NUP37, USP16, STAG2, ZW10, CCNK, ARHGEF2, ZC3HC1, ROCK1, ANAPC5, RAN, ANAPC4, UBE2I, RB1, CDK7, DCTN3, CDK4, PPP1CB, ARL3, PPP1CA, RCC2, CFL1, PELO, MAPRE2, BIN3, MAPRE1, RUVBL1, NUP43, SEPT7, NEK6, SEPT9, BBS4, FZR1, PARD3, DIAPH2, HAUS1, CETN2, CEP164, NR2C2, KATNA1, PAFAH1B1, CLASP1, SKA2, RASA1,…	2037	149	4909	1.16452	1	0.851169	74.8946
GOTERM_BP_FAT	GO:0000087~M phase of mitotic cell cycle	58	2.06995	0.0897148	LZTS2, SEPT2, LATS1, LATS2, NDE1, SEH1L, TARDBP, INCENP, NUP37, USP16, STAG2, ZW10, CCNK, ARHGEF2, ZC3HC1, ANAPC5, RAN, ANAPC4, UBE2I, DCTN3, DCTN1, RCC2, CLIP1, MAPRE2, RUVBL1, AKAP8, MAPRE1, NUP43, SEPT7, NEK6, PPP5C, FZR1, HAUS1, CETN2, CEP164, TUBB, NUMA1, NIPBL, KATNA1, PBRM1, PAFAH1B1, CLASP1, SKA2, BUB3, TERF1, PDS5A, CKAP5, CDC23, SIRT7, SUGT1, CDC27, SMC3, SMC4, CDC25B, NEDD1, NOLC1, MPH…	2037	119	4909	1.17458	1	0.893109	82.6787
GOTERM_BP_FAT	GO:0000280~nuclear division	56	1.99857	0.111892	LZTS2, SEPT2, LATS1, LATS2, NDE1, SEH1L, TARDBP, INCENP, NUP37, USP16, STAG2, ZW10, CCNK, ARHGEF2, ZC3HC1, ANAPC5, RAN, ANAPC4, UBE2I, DCTN3, DCTN1, RCC2, CLIP1, MAPRE2, RUVBL1, AKAP8, MAPRE1, NUP43, SEPT7, NEK6, PPP5C, FZR1, HAUS1, CETN2, CEP164, TUBB, NUMA1, NIPBL, KATNA1, PBRM1, CLASP1, SKA2, PAFAH1B1, BUB3, TERF1, PDS5A, CKAP5, CDC23, SUGT1, CDC27, SMC3, SMC4, CDC25B, NEDD1, NOLC1, TXNL4A	2037	116	4909	1.16341	1	0.925625	89.0658
GOTERM_BP_FAT	GO:0007067~mitosis	56	1.99857	0.111892	LZTS2, SEPT2, LATS1, LATS2, NDE1, SEH1L, TARDBP, INCENP, NUP37, USP16, STAG2, ZW10, CCNK, ARHGEF2, ZC3HC1, ANAPC5, RAN, ANAPC4, UBE2I, DCTN3, DCTN1, RCC2, CLIP1, MAPRE2, RUVBL1, AKAP8, MAPRE1, NUP43, SEPT7, NEK6, PPP5C, FZR1, HAUS1, CETN2, CEP164, TUBB, NUMA1, NIPBL, KATNA1, PBRM1, CLASP1, SKA2, PAFAH1B1, BUB3, TERF1, PDS5A, CKAP5, CDC23, SUGT1, CDC27, SMC3, SMC4, CDC25B, NEDD1, NOLC1, TXNL4A	2037	116	4909	1.16341	1	0.925625	89.0658
GOTERM_BP_FAT	GO:0048285~organelle fission	58	2.06995	0.11933	LZTS2, SEPT2, LATS1, LATS2, NDE1, SEH1L, TARDBP, INCENP, NUP37, USP16, STAG2, ZW10, CCNK, ARHGEF2, ZC3HC1, OPA1, ANAPC5, RAN, ANAPC4, UBE2I, DCTN3, DCTN1, RCC2, CLIP1, MAPRE2, RUVBL1, AKAP8, MAPRE1, NUP43, SEPT7, NEK6, PPP5C, FZR1, HAUS1, CETN2, CEP164, TUBB, NUMA1, NIPBL, KATNA1, PBRM1, PAFAH1B1, CLASP1, SKA2, BUB3, TERF1, PDS5A, CKAP5, CDC23, SUGT1, CDC27, SMC3, SMC4, CDC25B, NEDD1, NOLC1, BAX,…	2037	121	4909	1.15517	1	0.928851	90.6532
SP_PIR_KEYWORDS	mitosis	47	1.67737	0.184025	LZTS2, FZR1, SEPT2, HAUS1, CETN2, CEP164, LATS1, LATS2, NUMA1, NDE1, SEH1L, INCENP, KATNA1, CLASP1, NUP37, PAFAH1B1, SKA2, DYNC1H1, USP16, STAG2, BUB3, ZW10, TERF1, CSNK1A1, ARHGEF2, CCNK, ZC3HC1, PDS5A, ANAPC5, CKAP5, RAN, ANAPC4, CDC23, UBE2I, DCTN3, SMC3, SMC4, CDC25B, NEDD1, RCC2, MAPRE2, RUVBL1, MAPRE1, SEPT7, NUP43, NEK6, TXNL4A	2621	100	6373	1.14281	1	0.786919	95.2564
Annotation Cluster 35	Enrichment Score: 1.6916860282878807
Category	Term	Count	%	PValue	Genes	List Total	Pop Hits	Pop Total	Fold Enrichment	Bonferroni	Benjamini	FDR
GOTERM_BP_FAT	GO:0032259~methylation	22	0.785153	0.00145098	ZCCHC4, HSD3B7, PICK1, CTCF, N6AMT2, ETF1, ATRX, PRMT1, PRMT2, TRMT11, PRMT6, GATAD2A, DNMT1, PCMT1, RAB6A, FTSJ1, SETD2, CARM1, NSD1, BAZ2A, RNF20, FTSJ3	2037	30	4909	1.76727	0.997546	0.092385	2.67198
GOTERM_BP_FAT	GO:0006730~one-carbon metabolic process	30	1.07066	0.00605481	HSD3B7, CTCF, N6AMT2, ALDH1L2, MTHFD2, KDM1A, PRMT1, PRMT2, PRMT6, GATAD2A, PCMT1, KDM3A, RAB6A, FTSJ1, BAZ2A, FTSJ3, ZCCHC4, SHMT2, CA12, PICK1, ETF1, ATRX, TRMT11, JMJD6, DNMT1, MAT2B, CARM1, SETD2, NSD1, RNF20	2037	48	4909	1.5062	1	0.258626	10.7097
GOTERM_BP_FAT	GO:0043414~biopolymer methylation	19	0.678087	0.00712428	HSD3B7, PICK1, CTCF, ETF1, ATRX, PRMT1, PRMT2, PRMT6, GATAD2A, DNMT1, PCMT1, RAB6A, FTSJ1, SETD2, CARM1, NSD1, BAZ2A, RNF20, FTSJ3	2037	27	4909	1.69587	1	0.291145	12.4847
GOTERM_BP_FAT	GO:0008213~protein amino acid alkylation	10	0.356888	0.235794	PRMT1, PRMT2, PRMT6, PCMT1, RAB6A, CARM1, SETD2, ETF1, NSD1, RNF20	2037	17	4909	1.4176	1	0.989359	99.3368
GOTERM_BP_FAT	GO:0006479~protein amino acid methylation	10	0.356888	0.235794	PRMT1, PRMT2, PRMT6, PCMT1, RAB6A, CARM1, SETD2, ETF1, NSD1, RNF20	2037	17	4909	1.4176	1	0.989359	99.3368
Annotation Cluster 36	Enrichment Score: 1.6577360202542815
Category	Term	Count	%	PValue	Genes	List Total	Pop Hits	Pop Total	Fold Enrichment	Bonferroni	Benjamini	FDR
UP_SEQ_FEATURE	short sequence motif:Prevents secretion from ER	24	0.856531	0.00479189	FKBP9, P4HB, PDIA3, FOXRED2, DNAJC10, PDIA6, PDIA4, EDEM3, CERCAM, CALR, TMED9, SERPINH1, CALU, ERP44, TXNDC12, KDELC1, KDELC2, PPIB, FKBP14, FKBP10, UGGT1, RCN1, B3GALTL, RCN2	2621	36	6370	1.62025	1	0.886331	8.8788
INTERPRO	IPR000886:Endoplasmic reticulum, targeting sequence	18	0.642398	0.0182269	P4HB, FKBP9, DNAJC10, PDIA6, PDIA4, EDEM3, CERCAM, CALR, SERPINH1, ERP44, KDELC1, KDELC2, FKBP14, FKBP10, UGGT1, RCN1, B3GALTL, RCN2	2407	27	5842	1.61806	1	0.844107	27.9441
GOTERM_CC_FAT	GO:0005788~endoplasmic reticulum lumen	25	0.89222	0.121779	P4HB, PDIA3, FOXRED2, DNAJC10, PDIA6, PDIA4, EDEM3, CERCAM, CALR, SERPINH1, ERLEC1, CALU, TXNDC12, ERP44, KDELC1, KDELC2, PPIB, H6PD, P4HA1, TOR1B, FKBP14, FKBP10, UGGT1, RCN1, RCN2	1880	48	4615	1.27854	1	0.605441	85.9377
Annotation Cluster 37	Enrichment Score: 1.64465298254745
Category	Term	Count	%	PValue	Genes	List Total	Pop Hits	Pop Total	Fold Enrichment	Bonferroni	Benjamini	FDR
GOTERM_BP_FAT	GO:0051493~regulation of cytoskeleton organization	45	1.606	0.00126777	TRIOBP, CAV1, LIMA1, CAPZA2, CAPZA1, ARF6, RDX, ARPC5, TPM1, LATS1, CXCL12, CAPZB, DSTN, CTNNB1, SORBS3, CDC42EP2, PFN2, SBDS, MACF1, ARPC3, CEP250, ARPC2, NPM1, RAC1, RHOA, CLASP1, RANBP1, SKA2, RASA1, TERF1, ARHGEF2, MAP1A, MAP1B, SMAD3, TMSB10, RICTOR, NEXN, ARPC1B, TSC1, ARPC5L, CFL1, MAP4, MAPRE1, SPTAN1, ADD1	2037	74	4909	1.46549	0.994756	0.083791	2.33837
GOTERM_BP_FAT	GO:0033043~regulation of organelle organization	60	2.14133	0.00202782	LIMA1, CAPZA2, CAPZA1, CTCF, LATS1, CXCL12, DSTN, CTNNB1, CDC42, SBDS, CEP250, RHOA, RANBP1, TLK1, TPR, MYC, ARHGEF2, TMSB10, NEXN, TNKS2, ARPC1B, ARPC5L, CFL1, MAPRE1, NEK6, ADD1, TRIOBP, CAV1, PML, ARF6, RDX, ARPC5, TPM1, CAPZB, POT1, SORBS3, CDC42EP2, PFN2, SET, ARPC3, MACF1, ARPC2, NPM1, RAC1, TNKS, CLASP1, SKA2, RASA1, TERF1, MAP1A, MAP1B, SMAD3, CDC23, RICTOR, ATM, PSMG2, TSC1, DNMT1, MAP4,…	2037	106	4909	1.3641	0.999776	0.119529	3.71534
GOTERM_BP_FAT	GO:0008064~regulation of actin polymerization or depolymerization	24	0.856531	0.00538838	TRIOBP, LIMA1, CAPZA2, CAPZA1, RDX, ARF6, TMSB10, RICTOR, ARPC5, LATS1, CXCL12, CAPZB, DSTN, ARPC1B, PFN2, CDC42EP2, ARPC3, ARPC2, ARPC5L, CFL1, RAC1, RASA1, ADD1, SPTAN1	2037	36	4909	1.60661	1	0.241251	9.58638
GOTERM_BP_FAT	GO:0044087~regulation of cellular component biogenesis	42	1.49893	0.00759241	TRIOBP, BBS4, CAV1, CAPZA2, CLU, CAPZA1, HCFC1, ARF6, RDX, ARPC5, SRF, LATS1, CAPZB, TPM1, CDC42, SUMO1, EIF4EBP1, CDC42EP2, SORBS3, ARPC3, ARPC2, RAC1, RHOA, RALA, PRKAA1, RASA1, RPS27A, TERF1, PRKCA, TGFBR1, MAP1B, SMAD3, TMSB10, RICTOR, MMP14, ARPC1B, TSC1, ARPC5L, CAND1, MAPRE1, SPTAN1, ADD1	2037	73	4909	1.38653	1	0.301252	13.2512
GOTERM_BP_FAT	GO:0030832~regulation of actin filament length	24	0.856531	0.00871749	TRIOBP, LIMA1, CAPZA2, CAPZA1, RDX, ARF6, TMSB10, RICTOR, ARPC5, LATS1, CXCL12, CAPZB, DSTN, ARPC1B, PFN2, CDC42EP2, ARPC3, ARPC2, ARPC5L, CFL1, RAC1, RASA1, ADD1, SPTAN1	2037	37	4909	1.56319	1	0.331464	15.0673
GOTERM_BP_FAT	GO:0043254~regulation of protein complex assembly	30	1.07066	0.00903909	TRIOBP, CAV1, CAPZA2, CLU, CAPZA1, HCFC1, ARF6, RDX, ARPC5, SRF, LATS1, CAPZB, CDC42, SUMO1, CDC42EP2, EIF4EBP1, ARPC3, ARPC2, RAC1, RASA1, TERF1, MAP1B, TMSB10, RICTOR, ARPC1B, ARPC5L, CAND1, MAPRE1, ADD1, SPTAN1	2037	49	4909	1.47546	1	0.329558	15.5798
GOTERM_BP_FAT	GO:0032956~regulation of actin cytoskeleton organization	29	1.03498	0.0189327	TRIOBP, LIMA1, CAPZA2, CAPZA1, ARF6, RDX, ARPC5, LATS1, CAPZB, CXCL12, TPM1, DSTN, PFN2, CDC42EP2, SORBS3, ARPC3, ARPC2, RAC1, RHOA, RASA1, SMAD3, TMSB10, RICTOR, ARPC1B, TSC1, ARPC5L, CFL1, SPTAN1, ADD1	2037	49	4909	1.42628	1	0.51607	29.9889
GOTERM_BP_FAT	GO:0032970~regulation of actin filament-based process	29	1.03498	0.0189327	TRIOBP, LIMA1, CAPZA2, CAPZA1, ARF6, RDX, ARPC5, LATS1, CAPZB, CXCL12, TPM1, DSTN, PFN2, CDC42EP2, SORBS3, ARPC3, ARPC2, RAC1, RHOA, RASA1, SMAD3, TMSB10, RICTOR, ARPC1B, TSC1, ARPC5L, CFL1, SPTAN1, ADD1	2037	49	4909	1.42628	1	0.51607	29.9889
GOTERM_BP_FAT	GO:0032271~regulation of protein polymerization	23	0.820842	0.0297773	TRIOBP, CAV1, CAPZA2, MAP1B, CAPZA1, RDX, ARF6, TMSB10, RICTOR, ARPC5, LATS1, CAPZB, ARPC1B, CDC42EP2, ARPC3, ARPC2, ARPC5L, RAC1, MAPRE1, RASA1, ADD1, SPTAN1, TERF1	2037	38	4909	1.45863	1	0.641411	43.0981
GOTERM_BP_FAT	GO:0030833~regulation of actin filament polymerization	19	0.678087	0.0457742	TRIOBP, CAPZA2, CAPZA1, RDX, ARF6, TMSB10, RICTOR, ARPC5, CAPZB, LATS1, ARPC1B, CDC42EP2, ARPC3, ARPC2, ARPC5L, RAC1, RASA1, ADD1, SPTAN1	2037	31	4909	1.47705	1	0.757212	58.2694
GOTERM_BP_FAT	GO:0031333~negative regulation of protein complex assembly	12	0.428266	0.111519	CDC42, TRIOBP, EIF4EBP1, CAPZA2, CLU, CAPZA1, RDX, TMSB10, MAPRE1, CAPZB, SPTAN1, ADD1	2037	19	4909	1.52205	1	0.925964	88.9798
GOTERM_BP_FAT	GO:0032535~regulation of cellular component size	66	2.35546	0.227189	RTN4, PLXNA3, LIMA1, NRP1, ENOX2, CAPZA2, CAPZA1, LATS1, CXCL12, DSTN, APP, CDKN2A, DNAJC2, SERTAD1, SERTAD2, NOL8, TP53, SLC3A2, TMSB10, RB1, CDK4, VAT1, ARPC1B, CTH, PRDM4, ARPC5L, CFL1, BIN3, EMP3, ADD1, DCBLD2, TRIOBP, ENPP1, TAF9B, PML, PPT1, ARF6, RDX, ARPC5, CAPZB, CDC42EP2, PFN2, LAMB2, AKT1S1, ARPC3, NDRG3, ARPC2, RB1CC1, NPM1, TMEM123, RAC1, RASA1, ENO1, TGFBR1, CREB1, MAP1B, SMAD3, RIC…	2037	145	4909	1.09693	1	0.987819	99.1828
GOTERM_BP_FAT	GO:0030835~negative regulation of actin filament depolymerization	8	0.28551	0.263653	TRIOBP, LIMA1, CAPZA2, CAPZA1, RDX, CAPZB, SPTAN1, ADD1	2037	13	4909	1.48303	1	0.993699	99.6682
GOTERM_BP_FAT	GO:0030837~negative regulation of actin filament polymerization	8	0.28551	0.348925	TRIOBP, CAPZA2, CAPZA1, RDX, TMSB10, CAPZB, SPTAN1, ADD1	2037	14	4909	1.3771	1	0.998433	99.9666
Annotation Cluster 38	Enrichment Score: 1.6213424281692732
Category	Term	Count	%	PValue	Genes	List Total	Pop Hits	Pop Total	Fold Enrichment	Bonferroni	Benjamini	FDR
SP_PIR_KEYWORDS	DNA damage	48	1.71306	0.00549571	XRCC5, MORF4L1, RAD23B, NBN, ZMAT3, XRCC6, MLH1, CEP164, INTS3, MLH3, TTC5, KIN, SETX, RBX1, PRPF19, NONO, EPC2, CHD1L, PRMT6, RNF168, H2AFX, TLK1, APEX1, C19ORF40, ERCC2, POLK, SSRP1, TP53BP1, DTX3L, SMC5, GTF2H3, CDK7, PPP1CB, RAD50, SMC3, ATM, JMY, GTF2H1, RAD1, ATRX, EYA3, XPC, RIF1, CUL4A, BAZ1B, SFPQ, SUPT16H, APBB1	2621	85	6373	1.37309	0.974947	0.0786619	7.92836
SP_PIR_KEYWORDS	dna repair	43	1.53462	0.0114218	XRCC5, MORF4L1, RAD23B, NBN, XRCC6, MLH1, CEP164, INTS3, MLH3, TTC5, KIN, SETX, RBX1, PRPF19, NONO, EPC2, CHD1L, PRMT6, RNF168, H2AFX, GAPDH, APEX1, C19ORF40, ERCC2, POLK, SSRP1, TP53BP1, SMC5, GTF2H3, CDK7, RAD50, SMC3, ATM, JMY, GTF2H1, RAD1, ATRX, EYA3, RECQL, XPC, CUL4A, SFPQ, SUPT16H	2621	77	6373	1.35786	0.99954	0.13498	15.818
GOTERM_BP_FAT	GO:0006259~DNA metabolic process	108	3.85439	0.0143332	MORF4L1, XRCC5, DBF4, RBM4, XRCC6, INTS3, SETX, NONO, EPC2, CDKN2A, PSIP1, H2AFX, DNAJC2, RBMS1, POLK, C5ORF51, RAN, PICK1, RAD1, RFC4, MYO18A, TNFAIP1, RAD23B, PPT1, CEP164, TTC5, BANF1, RBX1, SMARCB1, RNF168, ASF1A, TP53BP1, TSN, ATM, TNKS1BP1, POLD4, TXNDC12, SUPT16H, PCNA, DNMT1, PARP4, RBPJ, PTGES3, NBN, NAP1L1, MLH1, CTCF, MLH3, ANKRD17, CASP3, SLK, PRMT6, TOP2B, MYC, C19ORF40, NOL8, TP53, …	2037	219	4909	1.18845	1	0.437048	23.6068
GOTERM_BP_FAT	GO:0006281~DNA repair	61	2.17702	0.0286514	XRCC5, MORF4L1, NBN, RBM4, XRCC6, MLH1, INTS3, MLH3, SETX, NONO, ANKRD17, EPC2, SLK, PRMT6, H2AFX, C19ORF40, POLK, TP53, GTF2H3, CDK7, RAD50, GTF2H1, JMY, RAD1, EYA3, RECQL, RFC4, XPC, RUVBL2, RAD23B, SHFM1, PML, CEP164, TTC5, KIN, RBX1, PRPF19, SUMO1, CHD1L, RNF168, APEX1, ASF1A, FEN1, ERCC2, SSRP1, UPF1, MSH5, TP53BP1, SMC5, SMC3, ATM, ATRX, MNAT1, POLD4, ATXN3, CSNK1D, CUL4A, SFPQ, PCNA, SUPT1…	2037	119	4909	1.23534	1	0.633101	41.8538
GOTERM_BP_FAT	GO:0006974~response to DNA damage stimulus	85	3.03355	0.0384768	XRCC5, MORF4L1, NBN, MICA, ZMAT3, RBM4, XRCC6, MLH1, INTS3, MLH3, RPS3, SETX, NONO, ANKRD17, EPC2, CASP3, SLK, HMOX1, PRMT6, H2AFX, TLK1, GNL1, C19ORF40, POLK, PGAP2, SP100, RINT1, TP53, GTF2H3, IFI16, CDK7, PPP1CB, RAD50, JMY, GTF2H1, EYA3, RAD1, MAPK1, RECQL, XPC, RFC4, HIPK1, BAZ1B, RIF1, RUVBL2, RAD23B, SHFM1, PML, CEP164, TTC5, KIN, RBX1, PRPF19, SUMO1, CHD1L, RNF168, ASF1A, APEX1, FEN1, ERC…	2037	174	4909	1.17726	1	0.710528	51.8975
GOTERM_BP_FAT	GO:0033554~cellular response to stress	120	4.28266	0.188581	MORF4L1, XRCC5, MICA, RBM4, XRCC6, INTS3, MBIP, SETX, NONO, EPC2, MDFIC, H2AFX, TLK1, GNL1, DBNL, POLK, ATG9A, RINT1, AARS, PPP1CB, RAD1, MAP4K3, MAPK1, MAP4K5, RFC4, HIF1A, BAZ1B, JUN, NFE2L2, EIF2AK2, EIF2AK4, RAD23B, CAV1, CEP164, TTC5, RBX1, ARNT, SLC11A2, LAMB2, RNF168, ERO1L, ASF1A, DHX9, TP53BP1, TAOK3, ATM, ATP7A, ATF6, POLD4, TXNDC12, ATF4, UACA, BBC3, NEDD4, SUPT16H, PCNA, PARP4, PXDN, …	2037	269	4909	1.07506	1	0.978595	97.9712
Annotation Cluster 39	Enrichment Score: 1.5796219761053214
Category	Term	Count	%	PValue	Genes	List Total	Pop Hits	Pop Total	Fold Enrichment	Bonferroni	Benjamini	FDR
GOTERM_BP_FAT	GO:0006418~tRNA aminoacylation for protein translation	19	0.678087	0.00193249	YARS, CARS, NARS, AIMP1, DARS, ZNFX1, SARS, AARS, GARS, EPRS, VARS, DTD1, IARS, TARS, RARS, HARS, TPR, EIF2AK4, MARS	2037	25	4909	1.83154	0.999667	0.11589	3.54364
GOTERM_BP_FAT	GO:0043039~tRNA aminoacylation	19	0.678087	0.00193249	YARS, CARS, NARS, AIMP1, DARS, ZNFX1, SARS, AARS, GARS, EPRS, VARS, DTD1, IARS, TARS, RARS, HARS, TPR, EIF2AK4, MARS	2037	25	4909	1.83154	0.999667	0.11589	3.54364
GOTERM_BP_FAT	GO:0043038~amino acid activation	19	0.678087	0.00193249	YARS, CARS, NARS, AIMP1, DARS, ZNFX1, SARS, AARS, GARS, EPRS, VARS, DTD1, IARS, TARS, RARS, HARS, TPR, EIF2AK4, MARS	2037	25	4909	1.83154	0.999667	0.11589	3.54364
GOTERM_MF_FAT	GO:0004812~aminoacyl-tRNA ligase activity	18	0.642398	0.0037189	YARS, CARS, NARS, DARS, ZNFX1, SARS, AARS, GARS, EPRS, VARS, DTD1, IARS, TARS, RARS, HARS, TPR, EIF2AK4, MARS	1942	24	4649	1.79544	0.994692	0.230432	5.95731
GOTERM_MF_FAT	GO:0016876~ligase activity, forming aminoacyl-tRNA and related compounds	18	0.642398	0.0037189	YARS, CARS, NARS, DARS, ZNFX1, SARS, AARS, GARS, EPRS, VARS, DTD1, IARS, TARS, RARS, HARS, TPR, EIF2AK4, MARS	1942	24	4649	1.79544	0.994692	0.230432	5.95731
GOTERM_MF_FAT	GO:0016875~ligase activity, forming carbon-oxygen bonds	18	0.642398	0.0037189	YARS, CARS, NARS, DARS, ZNFX1, SARS, AARS, GARS, EPRS, VARS, DTD1, IARS, TARS, RARS, HARS, TPR, EIF2AK4, MARS	1942	24	4649	1.79544	0.994692	0.230432	5.95731
SP_PIR_KEYWORDS	Aminoacyl-tRNA synthetase	15	0.535332	0.00851759	CARS, YARS, DARS, NARS, SARS, AARS, GARS, EPRS, VARS, DTD1, IARS, TARS, RARS, HARS, MARS	2621	20	6373	1.82364	0.996729	0.110227	12.0339
KEGG_PATHWAY	hsa00970:Aminoacyl-tRNA biosynthesis	15	0.535332	0.0124253	CARS, YARS, DARS, NARS, SARS, AARS, GARS, EPRS, VARS, DTD1, IARS, TARS, RARS, HARS, MARS	826	21	2054	1.7762	0.901043	0.281392	14.3338
INTERPRO	IPR002314:Aminoacyl-tRNA synthetase, class II (G, H, P and S), conserved region	7	0.249822	0.0220371	TARS, SARS, HARS, GARS, EPRS, EIF2AK4, DTD1	2407	7	5842	2.42709	1	0.877076	32.767
INTERPRO	IPR006195:Aminoacyl-tRNA synthetase, class II, conserved region	8	0.28551	0.0296516	TARS, NARS, DARS, SARS, HARS, GARS, EPRS, DTD1	2407	9	5842	2.15741	1	0.910641	41.5073
GOTERM_BP_FAT	GO:0006399~tRNA metabolic process	28	0.999286	0.0491183	NARS, ZNFX1, TYW3, VARS, DTD1, IARS, ADAT3, THG1L, TPR, TSEN15, MARS, YARS, CARS, AIMP1, DARS, SARS, AARS, GARS, EPRS, SSB, FBL, TARS, TRMT11, RARS, HARS, POP1, WDR4, EIF2AK4	2037	50	4909	1.34955	1	0.76488	60.9143
INTERPRO	IPR004154:Anticodon-binding	5	0.178444	0.0963589	TARS, HARS, GARS, EPRS, DTD1	2407	5	5842	2.42709	1	0.995572	83.5556
UP_SEQ_FEATURE	short sequence motif:"HIGH" region	7	0.249822	0.271862	IARS, YARS, CARS, RARS, EPRS, VARS, MARS	2621	11	6370	1.5466	1	1	99.7848
INTERPRO	IPR000738:WHEP-TRS	4	0.142755	0.33805	HARS, GARS, EPRS, MARS	2407	5	5842	1.94167	1	0.999998	99.9358
UP_SEQ_FEATURE	short sequence motif:"KMSKS" region	6	0.214133	0.395432	IARS, YARS, CARS, EPRS, VARS, MARS	2621	10	6370	1.45822	1	1	99.9941
INTERPRO	IPR001412:Aminoacyl-tRNA synthetase, class I, conserved site	9	0.321199	0.39792	IARS, YARS, CARS, PLXNB2, RARS, EPRS, VARS, WDR46, MARS	2407	17	5842	1.28493	1	1	99.9881
INTERPRO	IPR014729:Rossmann-like alpha/beta/alpha sandwich fold	9	0.321199	0.797397	IARS, YARS, CARS, RARS, NADSYN1, ASNS, VARS, PAPSS1, MARS	2407	23	5842	0.94973	1	1	100
Annotation Cluster 40	Enrichment Score: 1.576973808769995
Category	Term	Count	%	PValue	Genes	List Total	Pop Hits	Pop Total	Fold Enrichment	Bonferroni	Benjamini	FDR
INTERPRO	IPR001876:Zinc finger, RanBP2-type	9	0.321199	0.0149593	FUS, SHARPIN, RBCK1, MDM2, RANBP2, MDM4, TAB2, EWSR1, RNF31	2407	10	5842	2.18438	1	0.819716	23.5498
SMART	SM00547:ZnF_RBZ	9	0.321199	0.0217677	FUS, SHARPIN, RBCK1, MDM2, RANBP2, MDM4, TAB2, EWSR1, RNF31	1365	10	3133	2.06571	0.999856	0.625823	26.4491
UP_SEQ_FEATURE	zinc finger region:RanBP2-type	7	0.249822	0.057063	FUS, SHARPIN, RBCK1, MDM2, MDM4, TAB2, EWSR1	2621	8	6370	2.12657	1	0.998532	67.9328
Annotation Cluster 41	Enrichment Score: 1.5496851390968727
Category	Term	Count	%	PValue	Genes	List Total	Pop Hits	Pop Total	Fold Enrichment	Bonferroni	Benjamini	FDR
INTERPRO	IPR001487:Bromodomain	14	0.499643	0.00762881	ZMYND11, SP100, CREBBP, TRIM28, SP110, TRIM33, BPTF, BAZ1B, PBRM1, BRD4, SMARCA2, BAZ2A, SMARCA4, BRD8	2407	18	5842	1.88773	1	0.686709	12.7539
SMART	SM00297:BROMO	14	0.499643	0.0130947	ZMYND11, SP100, CREBBP, TRIM28, SP110, TRIM33, BPTF, BAZ1B, PBRM1, BRD4, SMARCA2, BAZ2A, SMARCA4, BRD8	1365	18	3133	1.78519	0.995003	0.484365	16.8052
SP_PIR_KEYWORDS	bromodomain	12	0.428266	0.0237744	ZMYND11, BAZ1B, TRIM33, BPTF, CREBBP, PBRM1, BRD4, SP110, BAZ2A, SMARCA2, SMARCA4, BRD8	2621	16	6373	1.82364	1	0.242353	30.2786
INTERPRO	IPR018359:Bromodomain, conserved site	12	0.428266	0.0241076	BAZ1B, TRIM33, BPTF, TRIM28, CREBBP, PBRM1, BRD4, SP110, BAZ2A, SMARCA2, SMARCA4, BRD8	2407	16	5842	1.82032	1	0.891286	35.2583
UP_SEQ_FEATURE	domain:Bromo	10	0.356888	0.06918	ZMYND11, BAZ1B, TRIM33, BPTF, TRIM28, CREBBP, SP110, BAZ2A, SMARCA2, SMARCA4	2621	14	6370	1.73598	1	0.999307	75.035
INTERPRO	IPR019787:Zinc finger, PHD-finger	16	0.571021	0.127084	ZMYND11, SP140L, RSF1, SP100, TRIM28, SP110, CXXC1, PHF3, PHF14, TRIM33, BPTF, BAZ1B, NSD1, KDM5B, BAZ2A, NFX1	2407	28	5842	1.38691	1	0.998135	91.1212
Annotation Cluster 42	Enrichment Score: 1.5205115080564426
Category	Term	Count	%	PValue	Genes	List Total	Pop Hits	Pop Total	Fold Enrichment	Bonferroni	Benjamini	FDR
GOTERM_CC_FAT	GO:0030286~dynein complex	8	0.28551	0.0095003	DYNLL1, DYNC2LI1, DYNC2H1, DYNLT3, DYNLT1, DYNC1H1, DYNC1I2, DCTN1	1880	8	4615	2.45479	0.99885	0.134111	13.4287
SP_PIR_KEYWORDS	dynein	8	0.28551	0.0101273	DYNLL1, DYNC2LI1, DYNC2H1, DYNLT3, DYNLT1, DYNC1H1, DYNC1I2, DCTN1	2621	8	6373	2.43151	0.998897	0.122743	14.1504
GOTERM_CC_FAT	GO:0005875~microtubule associated complex	23	0.820842	0.0237497	KIF3B, MAP1A, DYNC2LI1, HAUS1, MAP1B, DYNLT3, DYNLT1, DCTN3, DCTN1, STAU1, NPHP3, PEA15, EML1, NDEL1, DYNLL1, KLC1, KIFAP3, DYNC2H1, MAP4, PAFAH1B1, DYNC1H1, DYNC1I2, ACTR10	1880	38	4615	1.48579	1	0.240326	30.4484
GOTERM_CC_FAT	GO:0005868~cytoplasmic dynein complex	3	0.107066	0.362298	DYNLL1, DYNC1H1, DYNC1I2	1880	3	4615	2.45479	1	0.895877	99.8882
Annotation Cluster 43	Enrichment Score: 1.5048543552857736
Category	Term	Count	%	PValue	Genes	List Total	Pop Hits	Pop Total	Fold Enrichment	Bonferroni	Benjamini	FDR
SP_PIR_KEYWORDS	meiosis	9	0.321199	0.0147825	NBN, HSD3B7, MSH5, RBM7, H2AFX, SMC3, RAD50, BUB3, STAG2	2621	10	6373	2.18836	0.999953	0.16569	20.007
GOTERM_BP_FAT	GO:0051327~M phase of meiotic cell cycle	19	0.678087	0.0200186	ADCY3, NBN, HSD3B7, MSH5, MLH1, UBR2, RBM7, DMWD, MLH3, RAD50, ATM, SMC3, CDC25B, RAD1, PSMD13, CKS2, H2AFX, STAG2, ZW10	2037	29	4909	1.57891	1	0.529535	31.4203
GOTERM_BP_FAT	GO:0007126~meiosis	19	0.678087	0.0200186	ADCY3, NBN, HSD3B7, MSH5, MLH1, UBR2, RBM7, DMWD, MLH3, RAD50, ATM, SMC3, CDC25B, RAD1, PSMD13, CKS2, H2AFX, STAG2, ZW10	2037	29	4909	1.57891	1	0.529535	31.4203
GOTERM_BP_FAT	GO:0051321~meiotic cell cycle	20	0.713776	0.0202669	ADCY3, NBN, HSD3B7, MSH5, MLH1, UBR2, RBM7, DMWD, MLH3, RAD50, ATM, SMC3, CDC25B, RAD1, NUMA1, PSMD13, CKS2, H2AFX, STAG2, ZW10	2037	31	4909	1.55478	1	0.530771	31.7436
GOTERM_BP_FAT	GO:0007127~meiosis I	9	0.321199	0.249072	RAD1, PSMD13, HSD3B7, MSH5, CKS2, MLH1, MLH3, ATM, RAD50	2037	15	4909	1.44595	1	0.99177	99.5217
Annotation Cluster 44	Enrichment Score: 1.4536517981179926
Category	Term	Count	%	PValue	Genes	List Total	Pop Hits	Pop Total	Fold Enrichment	Bonferroni	Benjamini	FDR
GOTERM_BP_FAT	GO:0006457~protein folding	58	2.06995	0.000803483	HSP90AB1, COPA, LTBP4, DNAJB14, DNAJC10, VBP1, PDIA6, DNAJB12, CCT2, CCT3, AIP, DNAJC17, PIGK, TOR3A, BAG3, BAG2, RANBP2, DNAJC2, DNAJC1, FUT10, AARS, TBCE, CCT6A, NKTR, PFDN4, FKBP14, RUVBL2, FKBP10, UGGT1, FKBP9, FKBP8, PPIL2, FKBP3, FKBP1A, LMAN1, CALR, SEC63, SH3GLB1, TOR1B, PPIL4, ERO1L, QSOX1, HSPA8, PPWD1, CWC27, HSPBP1, ATF6, ERP44, CCT5, PPIH, PPIG, CLGN, PPIB, PPID, PPIC, DNAJB1, DNAJB4…	2037	99	4909	1.41187	0.964098	0.0586969	1.48807
GOTERM_MF_FAT	GO:0051082~unfolded protein binding	33	1.17773	0.160659	PTGES3, HSP90AB1, COPA, DNAJC10, VBP1, DNAJB14, DNAJB12, CCT2, CCT3, CALR, LMAN1, SERPINH1, SEC63, AIP, TAPBP, DNAJC17, HTRA2, NPM1, TOR1B, DNAJC2, HSPA8, DNAJC1, CCT6A, CCT5, CLGN, PPIB, PFDN4, PPIC, RUVBL2, DNAJB1, DNAJB4, UGGT1, DNAJB5	1942	66	4649	1.19696	1	0.962494	94.4268
SP_PIR_KEYWORDS	Chaperone	40	1.42755	0.337414	PTGES3, HSP90AB1, DNAJC10, VBP1, DNAJB14, DNAJB12, CCT2, CCT3, CALR, SERPINH1, SEC63, DNAJC17, BAG3, BAG2, NPM1, TOR1B, NPM3, DNAJC2, CDC37L1, ASF1A, HSPA8, DNAJC1, TOMM34, P4HB, TBCE, CCT6A, RBBP7, BBS10, ERP44, PPIH, CCT5, PSMG1, PSMG2, CLGN, TBCB, PFDN4, DNAJB1, AHSA2, DNAJB4, DNAJB5	2621	89	6373	1.09282	1	0.921892	99.7908
Annotation Cluster 45	Enrichment Score: 1.445373146318452
Category	Term	Count	%	PValue	Genes	List Total	Pop Hits	Pop Total	Fold Enrichment	Bonferroni	Benjamini	FDR
GOTERM_CC_FAT	GO:0030120~vesicle coat	16	0.571021	0.000783102	COPZ2, SEC23A, COPA, SEC31A, SEC24A, AP4E1, CLTC, COPB2, AP1S1, COPB1, ARCN1, NECAP2, SEC24C, SEC24D, SEC23B, COPE	1880	19	4615	2.06719	0.426179	0.0189707	1.17647
GOTERM_BP_FAT	GO:0006890~retrograde vesicle-mediated transport, Golgi to ER	12	0.428266	0.00185411	KIF1C, ARFGAP1, COG3, COPB2, COPA, SCFD1, COG7, COPB1, ARCN1, PICK1, COPE, TAPBP	2037	13	4909	2.22454	0.999539	0.113097	3.40226
GOTERM_CC_FAT	GO:0005798~Golgi-associated vesicle	18	0.642398	0.00526269	TGOLN2, COPZ2, COPA, AP4E1, GJA1, VPS41, CLTC, ATP7A, COPB2, AP1S1, SCFD1, CHIC2, COPB1, GOPC, ARCN1, SPG21, GOLGA5, COPE	1880	25	4615	1.76745	0.976272	0.085222	7.66162
GOTERM_CC_FAT	GO:0030660~Golgi-associated vesicle membrane	11	0.392577	0.00894434	COPZ2, COPB2, COPA, AP1S1, AP4E1, COPB1, ARCN1, GJA1, GOLGA5, CLTC, COPE	1880	13	4615	2.07713	0.998288	0.129319	12.6917
GOTERM_CC_FAT	GO:0030663~COPI coated vesicle membrane	8	0.28551	0.0095003	COPZ2, COPB2, COPA, AP4E1, COPB1, ARCN1, GOLGA5, COPE	1880	8	4615	2.45479	0.99885	0.134111	13.4287
GOTERM_CC_FAT	GO:0030126~COPI vesicle coat	7	0.249822	0.0206824	COPZ2, COPB2, COPA, AP4E1, COPB1, ARCN1, COPE	1880	7	4615	2.45479	1	0.218828	27.0732
GOTERM_CC_FAT	GO:0030137~COPI-coated vesicle	8	0.28551	0.0276849	COPZ2, COPB2, COPA, AP4E1, COPB1, ARCN1, GOLGA5, COPE	1880	9	4615	2.18203	1	0.260364	34.5653
GOTERM_BP_FAT	GO:0016050~vesicle organization	17	0.606709	0.030791	ARFGAP1, COPA, CAV1, RAB8A, GNAI3, EEA1, EPS15, COPB2, PICALM, BLOC1S2, ZFYVE16, COPB1, ARCN1, BLOC1S1, USO1, DLG4, COPE	2037	26	4909	1.57571	1	0.644979	44.1968
GOTERM_BP_FAT	GO:0006903~vesicle targeting	9	0.321199	0.0704857	ARFGAP1, COPB2, STX5, COPA, COPB1, ARCN1, SNAP23, YKT6, COPE	2037	12	4909	1.80744	1	0.850838	74.4192
GOTERM_BP_FAT	GO:0051650~establishment of vesicle localization	11	0.392577	0.0738069	ARFGAP1, BBS4, COPB2, STX5, COPA, BBS7, COPB1, ARCN1, SNAP23, YKT6, COPE	2037	16	4909	1.65682	1	0.855582	76.0712
GOTERM_BP_FAT	GO:0051648~vesicle localization	12	0.428266	0.0739706	ARFGAP1, BBS4, COPB2, STX5, COPA, BBS7, COPB1, ARCN1, SNAP23, YKT6, VPS33A, COPE	2037	18	4909	1.60661	1	0.854525	76.15
GOTERM_BP_FAT	GO:0051656~establishment of organelle localization	22	0.785153	0.0799625	ARFGAP1, STX5, BBS4, COPA, BBS7, MLH1, CDC23, CDC42, COPB2, NDE1, MAP1S, SEH1L, COPB1, RPS15, NPM1, ARCN1, RHOT2, PAFAH1B1, SNAP23, YKT6, COPE, ZW10	2037	39	4909	1.35944	1	0.868547	78.8698
GOTERM_CC_FAT	GO:0030662~coated vesicle membrane	17	0.606709	0.0818044	COPZ2, SEC23A, COPA, SEC24A, SEC31A, AP4E1, CLTC, COPB2, AP1S1, COPB1, ARCN1, NECAP2, SEC24C, GOLGA5, SEC24D, SEC23B, COPE	1880	29	4615	1.43901	1	0.485695	72.4524
GOTERM_BP_FAT	GO:0048194~Golgi vesicle budding	6	0.214133	0.111072	ARFGAP1, COPB2, COPA, COPB1, ARCN1, COPE	2037	7	4909	2.06564	1	0.926171	88.876
GOTERM_BP_FAT	GO:0048200~Golgi transport vesicle coating	6	0.214133	0.111072	ARFGAP1, COPB2, COPA, COPB1, ARCN1, COPE	2037	7	4909	2.06564	1	0.926171	88.876
GOTERM_BP_FAT	GO:0048205~COPI coating of Golgi vesicle	6	0.214133	0.111072	ARFGAP1, COPB2, COPA, COPB1, ARCN1, COPE	2037	7	4909	2.06564	1	0.926171	88.876
GOTERM_BP_FAT	GO:0006900~membrane budding	7	0.249822	0.1165	ARFGAP1, COPB2, COPA, PICALM, COPB1, ARCN1, COPE	2037	9	4909	1.87438	1	0.930759	90.0768
GOTERM_BP_FAT	GO:0006901~vesicle coating	7	0.249822	0.1165	ARFGAP1, COPB2, COPA, PICALM, COPB1, ARCN1, COPE	2037	9	4909	1.87438	1	0.930759	90.0768
GOTERM_BP_FAT	GO:0051640~organelle localization	25	0.89222	0.11712	ARFGAP1, COPA, BBS4, CEP120, BBS7, MLH1, VPS33A, COPB2, CDC42, NDE1, SEH1L, COPB1, NPM1, PAFAH1B1, SNAP23, ZW10, STX5, CDC23, NDEL1, MAP1S, RPS15, ARCN1, RHOT2, YKT6, COPE	2037	47	4909	1.28187	1	0.929885	90.2059
GOTERM_BP_FAT	GO:0048199~vesicle targeting, to, from or within Golgi	6	0.214133	0.197154	ARFGAP1, COPB2, COPA, COPB1, ARCN1, COPE	2037	8	4909	1.80744	1	0.980446	98.3358
Annotation Cluster 46	Enrichment Score: 1.421542371186901
Category	Term	Count	%	PValue	Genes	List Total	Pop Hits	Pop Total	Fold Enrichment	Bonferroni	Benjamini	FDR
GOTERM_CC_FAT	GO:0000118~histone deacetylase complex	17	0.606709	0.00234389	MORF4L1, MTA2, HDAC10, RBBP7, MBD2, APPL1, APPL2, NRIP1, CBX5, HDAC5, SAP30, CSNK2A1, SIN3A, CIR1, HDAC1, GATAD2A, HDAC7	1880	22	4615	1.89688	0.810576	0.0451641	3.48283
GOTERM_CC_FAT	GO:0016581~NuRD complex	7	0.249822	0.107317	CSNK2A1, HDAC1, MTA2, GATAD2A, RBBP7, APPL1, APPL2	1880	9	4615	1.90928	1	0.563852	82.0024
GOTERM_CC_FAT	GO:0017053~transcriptional repressor complex	10	0.356888	0.216157	CSNK2A1, HDAC1, SMARCE1, MTA2, SMARCC2, GATAD2A, RBBP7, APPL1, APPL2, CBX5	1880	17	4615	1.44399	1	0.765675	97.4755
Annotation Cluster 47	Enrichment Score: 1.418745635868722
Category	Term	Count	%	PValue	Genes	List Total	Pop Hits	Pop Total	Fold Enrichment	Bonferroni	Benjamini	FDR
GOTERM_BP_FAT	GO:0030518~steroid hormone receptor signaling pathway	22	0.785153	0.00275159	RAN, RBM4, MED24, RB1, CDK7, NR3C1, CALR, CTNNB1, NRIP1, MED4, NCOA2, RNF4, NCOA3, MED16, NEDD4, MED17, THRAP3, RARA, PIAS2, KDM3A, PPAP2A, CARM1	2037	31	4909	1.71026	0.999989	0.144634	5.00948
GOTERM_BP_FAT	GO:0030521~androgen receptor signaling pathway	15	0.535332	0.00450004	RAN, MED24, RB1, CDK7, NRIP1, CTNNB1, MED4, NCOA3, RNF4, MED16, MED17, THRAP3, PIAS2, KDM3A, PPAP2A	2037	19	4909	1.90257	1	0.210456	8.06826
GOTERM_BP_FAT	GO:0030522~intracellular receptor-mediated signaling pathway	25	0.89222	0.00557474	DCBLD2, RBM4, PML, MED24, NR3C1, CALR, CTNNB1, KDM3A, RARA, PPAP2A, SP100, RAN, RB1, CDK7, NRIP1, MED4, NCOA2, NCOA3, RNF4, NEDD4, MED16, MED17, THRAP3, PIAS2, CARM1	2037	38	4909	1.58547	1	0.243291	9.90185
GOTERM_MF_FAT	GO:0050681~androgen receptor binding	11	0.392577	0.0770598	RNF4, NCOA3, RAN, KDM3A, PIAS2, RB1, CDK7, CALR, NSD1, CTNNB1, NRIP1	1942	16	4649	1.64582	1	0.871261	73.339
GOTERM_MF_FAT	GO:0035257~nuclear hormone receptor binding	22	0.785153	0.213611	CUTA, RAN, MED24, RB1, CDK7, CALR, HMGA1, CTNNB1, NRIP1, MED4, NCOA2, NUP62, RNF4, NCOA3, MED16, MED17, THRAP3, PIAS2, KDM3A, TRIP6, NSD1, TRIP12	1942	43	4649	1.2248	1	0.977545	98.0965
GOTERM_MF_FAT	GO:0051427~hormone receptor binding	24	0.856531	0.233655	CUTA, RAN, MED24, RB1, CDK7, CALR, HMGA1, CTNNB1, NRIP1, TYK2, MED4, NCOA2, PSMC5, NUP62, RNF4, NCOA3, MED16, MED17, THRAP3, PIAS2, KDM3A, TRIP6, NSD1, TRIP12	1942	48	4649	1.19696	1	0.983621	98.7563
GOTERM_MF_FAT	GO:0035258~steroid hormone receptor binding	11	0.392577	0.441294	RNF4, NCOA3, RAN, KDM3A, PIAS2, RB1, CDK7, CALR, NSD1, CTNNB1, NRIP1	1942	22	4649	1.19696	1	0.998411	99.9932
Annotation Cluster 48	Enrichment Score: 1.418698974603094
Category	Term	Count	%	PValue	Genes	List Total	Pop Hits	Pop Total	Fold Enrichment	Bonferroni	Benjamini	FDR
INTERPRO	IPR001005:SANT, DNA-binding	15	0.535332	0.0162314	MTA2, MTA3, CDC5L, MIER1, DMTF1, SMARCC1, SMARCC2, SMARCA5, ZZZ3, SMARCA1, DNAJC2, DNAJC1, EP400, MYSM1, TERF1	2407	21	5842	1.73363	1	0.820399	25.2898
SMART	SM00717:SANT	15	0.535332	0.027489	MTA2, MTA3, CDC5L, MIER1, DMTF1, SMARCC1, SMARCC2, SMARCA5, ZZZ3, SMARCA1, DNAJC2, DNAJC1, EP400, MYSM1, TERF1	1365	21	3133	1.63946	0.999986	0.673893	32.2312
INTERPRO	IPR017884:SANT, eukarya	10	0.356888	0.0389206	MIER1, SMARCC1, MTA2, MTA3, SMARCC2, SMARCA5, SMARCA1, DNAJC2, MYSM1, DNAJC1	2407	13	5842	1.86699	1	0.954688	50.7011
INTERPRO	IPR014778:Myb, DNA-binding	12	0.428266	0.0431986	MIER1, DMTF1, SMARCC1, MTA2, MTA3, SMARCC2, ZZZ3, CDC5L, DNAJC2, MYSM1, DNAJC1, TERF1	2407	17	5842	1.71324	1	0.964786	54.4678
UP_SEQ_FEATURE	domain:SANT	6	0.214133	0.107484	MIER1, SMARCC1, MTA2, MTA3, SMARCC2, MYSM1	2621	7	6370	2.08317	1	0.999976	88.9318
Annotation Cluster 49	Enrichment Score: 1.3846919837786666
Category	Term	Count	%	PValue	Genes	List Total	Pop Hits	Pop Total	Fold Enrichment	Bonferroni	Benjamini	FDR
GOTERM_CC_FAT	GO:0031982~vesicle	133	4.74661	0.0244028	TGOLN2, SEC31A, AP4E1, VAPA, PTPN23, CNP, APP, CHIC2, PICALM, SND1, SLC2A1, BSG, ATG9A, RAN, PICK1, ACTN1, VPS41, SSPN, SPAG9, ARRB2, FNBP1L, VEGFA, BACE1, NRSN2, RAB13, VAMP1, ALDOA, COPZ2, RAB7A, PAM, CLCN3, CAV1, GNAI3, GRB2, CLU, GIPC1, PPT1, ITGB1, CALU, TIMP1, SLC11A2, ENTPD7, RAC1, ENTPD4, SLC30A7, FN1, AP2M1, P4HB, GARS, ATM, SREBF2, ATP7A, LAMP1, FNBP1, LAMP2, PPIB, ULK1, YIPF3, YIPF2, Y…	1880	284	4615	1.1496	1	0.239433	31.148
GOTERM_CC_FAT	GO:0031988~membrane-bounded vesicle	113	4.03283	0.0412032	TGOLN2, SEC31A, AP4E1, PTPN23, CNP, APP, CHIC2, PICALM, SND1, SLC2A1, BSG, RAN, PICK1, ACTN1, VPS41, SSPN, SPAG9, FNBP1L, VEGFA, NRSN2, COPZ2, ALDOA, RAB7A, PAM, CLCN3, GNAI3, GRB2, CLU, PPT1, GIPC1, ITGB1, CALU, TIMP1, RAC1, SLC30A7, FN1, AP2M1, P4HB, GARS, ATM, ATP7A, LAMP1, LAMP2, FNBP1, PPIB, ULK1, YIPF3, YIPF2, YIPF5, HSP90AB1, COPA, SEC24A, KIAA0368, PDIA3, RAB5C, AP1AR, HEXB, NAP1L1, ESD, …	1880	242	4615	1.14624	1	0.328176	47.0392
GOTERM_CC_FAT	GO:0031410~cytoplasmic vesicle	126	4.49679	0.0455457	TGOLN2, SEC31A, AP4E1, PTPN23, CNP, APP, CHIC2, PICALM, SND1, SLC2A1, BSG, ATG9A, RAN, PICK1, ACTN1, VPS41, SSPN, SPAG9, ARRB2, FNBP1L, VEGFA, BACE1, NRSN2, RAB13, VAMP1, COPZ2, RAB7A, PAM, CLCN3, CAV1, GNAI3, CLU, GIPC1, PPT1, ITGB1, CALU, TIMP1, SLC11A2, ENTPD7, RAC1, ENTPD4, SLC30A7, FN1, AP2M1, P4HB, GARS, ATM, SREBF2, ATP7A, LAMP1, FNBP1, LAMP2, PPIB, ULK1, YIPF3, YIPF2, YIPF5, HSP90AB1, COP…	1880	273	4615	1.13298	1	0.345395	50.5493
GOTERM_CC_FAT	GO:0016023~cytoplasmic membrane-bounded vesicle	108	3.85439	0.0631558	TGOLN2, SEC31A, AP4E1, PTPN23, CNP, APP, CHIC2, PICALM, SND1, SLC2A1, BSG, RAN, PICK1, ACTN1, VPS41, SSPN, SPAG9, FNBP1L, VEGFA, NRSN2, COPZ2, PAM, RAB7A, GNAI3, CLU, PPT1, GIPC1, ITGB1, CALU, TIMP1, RAC1, SLC30A7, FN1, AP2M1, P4HB, GARS, ATM, ATP7A, LAMP1, LAMP2, FNBP1, PPIB, ULK1, YIPF3, YIPF2, YIPF5, HSP90AB1, COPA, SEC24A, KIAA0368, PDIA3, RAB5C, AP1AR, HEXB, NAP1L1, ESD, AP3S1, GJA1, PDIA6, …	1880	234	4615	1.13298	1	0.427233	62.6753
Annotation Cluster 50	Enrichment Score: 1.374194591155958
Category	Term	Count	%	PValue	Genes	List Total	Pop Hits	Pop Total	Fold Enrichment	Bonferroni	Benjamini	FDR
GOTERM_MF_FAT	GO:0019208~phosphatase regulator activity	17	0.606709	0.0204342	PPP2R3A, PPP4R1, PPP2R5D, PPP2R5C, PPP1R11, PPP1R10, SHOC2, WBP11, ZEB2, PPP1CA, CSNK2A1, SET, PPP1R2, PPP1R7, PPP2R4, EIF2AK2, PPP1R14B	1942	25	4649	1.62787	1	0.563678	28.8481
GOTERM_MF_FAT	GO:0019888~protein phosphatase regulator activity	16	0.571021	0.0323637	PPP2R3A, PPP4R1, PPP2R5D, PPP2R5C, PPP1R11, SHOC2, PPP1R10, WBP11, PPP1CA, CSNK2A1, SET, PPP1R2, PPP1R7, PPP2R4, EIF2AK2, PPP1R14B	1942	24	4649	1.59595	1	0.70396	41.8619
GOTERM_MF_FAT	GO:0008601~protein phosphatase type 2A regulator activity	6	0.214133	0.114025	SET, PPP2R3A, PPP2R5D, PPP2R5C, PPP2R4, EIF2AK2	1942	7	4649	2.05193	1	0.932922	86.4098
Annotation Cluster 51	Enrichment Score: 1.3641066195195852
Category	Term	Count	%	PValue	Genes	List Total	Pop Hits	Pop Total	Fold Enrichment	Bonferroni	Benjamini	FDR
INTERPRO	IPR002464:DNA/RNA helicase, ATP-dependent, DEAH-box type, conserved site	12	0.428266	0.00507105	DHX9, CHD1L, DHX29, EXOC4, SMARCA5, DHX15, CHD2, DHX40, SMARCA1, EP400, DHX57, ERCC2	2407	14	5842	2.08036	0.999999	0.603311	8.65954
UP_SEQ_FEATURE	short sequence motif:DEAH box	10	0.356888	0.0186251	CHD9, CHD1L, DHX29, SMARCA5, DHX15, CHD2, YTHDC2, DHX40, SMARCA1, ERCC2	2621	12	6370	2.02531	1	0.957625	30.5058
INTERPRO	IPR007502:Helicase-associated region	6	0.214133	0.192393	DHX9, DHX29, DHX15, YTHDC2, DHX40, DHX57	2407	8	5842	1.82032	1	0.999758	97.7784
INTERPRO	IPR011709:Region of unknown function DUF1605	6	0.214133	0.192393	DHX9, DHX29, DHX15, YTHDC2, DHX40, DHX57	2407	8	5842	1.82032	1	0.999758	97.7784
Annotation Cluster 52	Enrichment Score: 1.3613745680514777
Category	Term	Count	%	PValue	Genes	List Total	Pop Hits	Pop Total	Fold Enrichment	Bonferroni	Benjamini	FDR
GOTERM_BP_FAT	GO:0006904~vesicle docking during exocytosis	11	0.392577	0.0104261	STX4, SCFD1, RAB8A, SCFD2, VPS45, EXOC4, RABEPK, STXBP3, YKT6, VPS33A, EXOC6B	2037	13	4909	2.03916	1	0.363567	17.7566
GOTERM_BP_FAT	GO:0048278~vesicle docking	12	0.428266	0.0126803	STX4, SCFD1, RAB8A, SCFD2, VPS45, EXOC4, RABEPK, STXBP3, EXOC5, YKT6, VPS33A, EXOC6B	2037	15	4909	1.92793	1	0.407239	21.1817
GOTERM_BP_FAT	GO:0006887~exocytosis	24	0.856531	0.0135364	STX4, YWHAZ, RAB8A, EXOC7, VPS45, GARS, SCRN1, LIN7C, RABEPK, STXBP3, TXLNA, VPS33A, ARFGEF1, LLGL1, LIN7A, SCFD1, SCFD2, EXOC4, EXOC3, EXOC5, CACNA1C, YKT6, SDF4, EXOC6B	2037	38	4909	1.52205	1	0.424799	22.4466
GOTERM_BP_FAT	GO:0032940~secretion by cell	36	1.2848	0.0373473	CYB5R4, YWHAZ, LTBP2, EXOC7, LTBP4, RABEPK, GIPC1, PDIA4, TXLNA, VPS33A, ARFGEF1, LLGL1, NISCH, LY6E, GNPTAB, CKLF, EXOC4, EXOC3, EXOC5, SDF4, RAB8A, STX4, TBX3, VPS45, SCRN1, GARS, LIN7C, STXBP3, LIN7A, SCFD1, SCFD2, GNAS, ARL4D, CACNA1C, YKT6, EXOC6B	2037	66	4909	1.3145	1	0.705138	50.8326
GOTERM_BP_FAT	GO:0022406~membrane docking	13	0.463954	0.0735204	RAB8A, STX4, ROCK1, VPS45, RABEPK, STXBP3, VPS33A, SCFD1, SCFD2, EXOC4, EXOC5, YKT6, EXOC6B	2037	20	4909	1.56645	1	0.856161	75.9328
INTERPRO	IPR001619:Sec1-like protein	5	0.178444	0.195859	SCFD1, SCFD2, VPS45, STXBP3, VPS33A	2407	6	5842	2.02257	1	0.999741	97.9423
GOTERM_BP_FAT	GO:0046903~secretion	42	1.49893	0.306912	COPA, CYB5R4, YWHAZ, SLC22A18, LTBP2, EXOC7, LTBP4, RABEPK, GIPC1, PDIA4, TXLNA, VPS33A, ARFGEF1, LLGL1, NISCH, LY6E, GNPTAB, HMOX1, CKLF, NFAT5, EXOC4, EXOC3, EXOC5, SDF4, TRPC1, STX4, RAB8A, TBX3, VPS45, SCRN1, PRKCI, GARS, LIN7C, STXBP3, LIN7A, SCFD1, SCFD2, GNAS, ARL4D, CACNA1C, YKT6, EXOC6B	2037	92	4909	1.10018	1	0.997013	99.8928

## Sheet: group3_lateinduced
Annotation Cluster 1	Enrichment Score: 12.222341768250711
Category	Term	Count	%	PValue	Genes	List Total	Pop Hits	Pop Total	Fold Enrichment	Bonferroni	Benjamini	FDR
SP_PIR_KEYWORDS	mitochondrion	156	13.2203	5.88184e-19	GRPEL1, PDP2, LDHD, NDUFAB1, OGDH, CLYBL, PDHB, SLC25A20, SLC25A25, STARD7, SLC25A22, MRPL38, ELOVL6, PDHA1, HADH, MRPL34, ACAA2, CRLS1, NUDT19, BCL2L13, PNPLA7, NFU1, LETM1, MRPS18C, SLC25A33, SLC25A35, YARS2, AKAP1, PCCB, TRIM39, MRPL44, MPST, HSD17B10, ME3, MRPS15, ADHFE1, MRPS11, CA5B, COX7C, OAS1, HADHA, HADHB, FIS1, MTCH2, TOMM5, ARG2, PEMT, DHODH, ALDH4A1, GCSH, MRPS27, ABCB8, PHB, AK3, C2…	1082	471	6373	1.95083	3.68203e-16	3.68203e-16	8.73745e-16
GOTERM_CC_FAT	GO:0005739~mitochondrion	191	16.1864	1.21158e-17	GRPEL1, PDP2, EHHADH, LDHD, NDUFAB1, BPHL, OGDH, CLYBL, PDHB, PECR, SLC25A20, SLC25A25, STARD7, SLC25A22, MRPL38, PRKACA, ELOVL6, PDHA1, HADH, MRPL34, PABPN1, ACAA2, CRLS1, NUDT19, BCL2L13, PNPLA7, NFU1, LETM1, MRPS18C, PSMA6, SLC25A33, SLC25A35, PLA2G2A, YARS2, AKAP1, PCCB, TRIM39, MRPL44, MPST, CAV2, HSD17B10, ME3, MRPS15, ADHFE1, MRPS11, CLU, CA5B, COX7C, OAS1, HSPA1B, HADHA, HADHB, FIS1, MTCH…	848	602	4615	1.72668	5.64595e-15	5.64595e-15	1.72744e-14
SP_PIR_KEYWORDS	transit peptide	103	8.72881	2.41985e-15	GRPEL1, PDP2, LDHD, NDUFAB1, OGDH, CLYBL, PDHB, STARD7, MRPL38, PDHA1, HADH, MRPL34, ACAA2, NUDT19, NFU1, LETM1, MRPS18C, YARS2, AKAP1, PCCB, MRPL44, ACAA1, ME3, MRPS15, ADHFE1, CA5B, MRPS11, COX7C, HADHA, HADHB, ARG2, DHODH, GCSH, ALDH4A1, ABCB8, C21ORF33, DLAT, MMAB, PPIF, NDUFV3, TXNDC12, MLYCD, COQ10A, FPGS, PC, UQCRC2, CPT2, ATP5B, HINT2, CYC1, ACOT2, ECHDC2, PRDX5, ECHDC3, UQCRFS1, ACSF2, A…	1082	284	6373	2.13617	1.529e-12	7.645e-13	3.63043e-12
UP_SEQ_FEATURE	transit peptide:Mitochondrion	101	8.55932	3.07722e-15	GRPEL1, PDP2, LDHD, NDUFAB1, OGDH, CLYBL, PDHB, STARD7, MRPL38, PDHA1, HADH, MRPL34, NUDT19, NFU1, LETM1, MRPS18C, YARS2, AKAP1, PCCB, MRPL44, ME3, MRPS15, ADHFE1, CA5B, MRPS11, COX7C, HADHA, HADHB, ARG2, DHODH, GCSH, ALDH4A1, ABCB8, C21ORF33, DLAT, MMAB, NDUFV3, PPIF, TXNDC12, MLYCD, COQ10A, FPGS, PC, UQCRC2, CPT2, ATP5B, HINT2, CYC1, ACOT2, ECHDC2, PRDX5, ECHDC3, UQCRFS1, ACSF2, ALAS1, LONP1, M…	1081	277	6370	2.1486	8.19744e-12	8.19744e-12	5.51781e-12
GOTERM_CC_FAT	GO:0044429~mitochondrial part	115	9.74576	2.74988e-12	GRPEL1, PDP2, LDHD, NDUFAB1, OGDH, PDHB, SLC25A20, SLC25A25, SLC25A22, PDHA1, HADH, MRPL34, ACAA2, CRLS1, LETM1, MRPS18C, SLC25A33, SLC25A35, YARS2, AKAP1, PCCB, HSD17B10, ME3, MRPS15, MRPS11, COX7C, HADHA, HADHB, FIS1, MTCH2, TOMM5, DHODH, ALDH4A1, ABCB8, PHB, AK3, UCP1, DLAT, PPIF, NDUFV3, TST, SLC25A11, TXNDC12, SARM1, UCP2, SLC25A10, RHOT1, GK, SLC25A18, PC, UQCRC2, CPT2, ATP5B, CYC1, BNIP3, …	848	341	4615	1.83535	1.28146e-09	6.40729e-10	3.92076e-09
GOTERM_CC_FAT	GO:0005759~mitochondrial matrix	47	3.98305	1.37956e-05	ME3, GRPEL1, MRPS15, PDP2, ATP5B, MRPS11, NDUFAB1, ECHS1, OGDH, HADHA, PDHB, HADHB, ALAS1, LONP1, MCCC1, PITRM1, MRPL18, ALDH4A1, DMGDH, PDHA1, HADH, PDHX, ETFB, MRPL34, HSPA9, ETFA, HSD17B8, PDK1, SHMT2, ACADM, ACO2, ACADS, CS, PDK4, AK3, DLAT, SOD2, TST, PPIF, HAGH, ACADVL, MRPS18C, CYP27A1, ALDH1B1, YARS2, PCCB, PC	848	138	4615	1.85351	0.00640818	0.000459094	0.0196677
GOTERM_CC_FAT	GO:0031980~mitochondrial lumen	47	3.98305	1.37956e-05	ME3, GRPEL1, MRPS15, PDP2, ATP5B, MRPS11, NDUFAB1, ECHS1, OGDH, HADHA, PDHB, HADHB, ALAS1, LONP1, MCCC1, PITRM1, MRPL18, ALDH4A1, DMGDH, PDHA1, HADH, PDHX, ETFB, MRPL34, HSPA9, ETFA, HSD17B8, PDK1, SHMT2, ACADM, ACO2, ACADS, CS, PDK4, AK3, DLAT, SOD2, TST, PPIF, HAGH, ACADVL, MRPS18C, CYP27A1, ALDH1B1, YARS2, PCCB, PC	848	138	4615	1.85351	0.00640818	0.000459094	0.0196677
Annotation Cluster 2	Enrichment Score: 9.14254426621045
Category	Term	Count	%	PValue	Genes	List Total	Pop Hits	Pop Total	Fold Enrichment	Bonferroni	Benjamini	FDR
SP_PIR_KEYWORDS	transmembrane	333	28.2203	5.58871e-13	CADM3, GLDN, VKORC1L1, LHCGR, AQP7, TMEM11, AQP1, ADORA1, AQP3, TMEM140, HS2ST1, AQP11, INSIG1, VMA21, ERAP1, APOO, F11R, TYRO3, CRLS1, PTPRF, AIG1, VTI1B, LHFP, BCL2L13, DHRS7B, LPCAT3, TMEM132C, NPC1, TMEM135, MGAT3, LETM1, CD36, HEPACAM, GPBAR1, SURF4, TMEM170B, PMP22, GPR146, CLCN3, CRELD1, HSD17B12, PTH1R, MMD, MME, HFE, FCGRT, SYPL2, EPHB2, SLC29A1, TMEM129, SLC29A2, SLC29A4, PEMT, BAI2, ST…	1082	1416	6373	1.38515	3.49863e-10	8.74657e-11	8.30225e-10
UP_SEQ_FEATURE	transmembrane region	329	27.8814	1.4637e-12	CADM3, GLDN, VKORC1L1, LHCGR, AQP7, TMEM11, AQP1, ADORA1, AQP3, TMEM140, HS2ST1, AQP11, INSIG1, VMA21, ERAP1, APOO, F11R, TYRO3, CRLS1, PTPRF, AIG1, VTI1B, LHFP, BCL2L13, DHRS7B, LPCAT3, TMEM132C, NPC1, TMEM135, MGAT3, LETM1, CD36, HEPACAM, GPBAR1, SURF4, TMEM170B, PMP22, GPR146, CLCN3, CRELD1, HSD17B12, PTH1R, MMD, MME, HFE, FCGRT, SYPL2, EPHB2, SLC29A1, TMEM129, SLC29A2, SLC29A4, PEMT, BAI2, ST…	1081	1405	6370	1.37985	3.85982e-09	1.92991e-09	2.59781e-09
SP_PIR_KEYWORDS	membrane	433	36.6949	3.22694e-11	VKORC1L1, SELENBP1, TMEM140, ERO1LB, AQP11, VMA21, TYRO3, PTPRF, AIG1, LHFP, BCL2L13, LPCAT3, TMEM132C, NPC1, TMEM135, SURF4, PMP22, HSD17B12, PTH1R, HFE, SYPL2, SLC29A1, TMEM129, SLC29A2, SLC29A4, RAC3, PEMT, LFNG, ACER3, PCNX, PHB, ACER2, ACACB, IFI27L1, KCNK3, EI24, TSGA10, GK, C19ORF12, TMEM41B, RTN4, KCNK15, BSCL2, BNIP3, KCNK12, RTN3, LNPEP, POMGNT1, ADCK2, MAPT, SPG21, SLC22A3, SLC22A5, GH…	1082	2000	6373	1.27519	2.02007e-08	4.04013e-09	4.79361e-08
GOTERM_CC_FAT	GO:0031224~intrinsic to membrane	367	31.1017	5.36333e-09	CADM3, GLDN, EFNA1, VKORC1L1, LHCGR, TMEM11, CD52, AQP7, AQP1, ADORA1, AQP3, TMEM140, HS2ST1, PSKH1, AQP11, INSIG1, VMA21, ERAP1, APOO, F11R, TYRO3, CRLS1, PTPRF, AIG1, VTI1B, LHFP, DHRS7B, BCL2L13, LPCAT3, TMEM132C, NPC1, TMEM135, MGAT3, LETM1, AAAS, CD36, HEPACAM, GPBAR1, SURF4, TMEM170B, PMP22, GPR146, PALM, CLCN3, CRELD1, HSD17B12, PTH1R, MMD, MME, HFE, FCGRT, NRN1, SYPL2, EPHB2, SLC29A1, TME…	848	1597	4615	1.25065	2.49931e-06	4.99862e-07	7.64691e-06
GOTERM_CC_FAT	GO:0016021~integral to membrane	354	30	8.52863e-09	CADM3, GLDN, EFNA1, VKORC1L1, LHCGR, CD52, AQP7, TMEM11, AQP1, ADORA1, AQP3, TMEM140, HS2ST1, AQP11, INSIG1, VMA21, ERAP1, APOO, F11R, TYRO3, CRLS1, PTPRF, AIG1, VTI1B, LHFP, BCL2L13, DHRS7B, LPCAT3, TMEM132C, NPC1, TMEM135, MGAT3, LETM1, AAAS, CD36, HEPACAM, GPBAR1, SURF4, TMEM170B, PMP22, GPR146, PALM, CLCN3, CRELD1, HSD17B12, PTH1R, MMD, MME, HFE, FCGRT, SYPL2, EPHB2, SLC29A1, TMEM129, SLC29A2…	848	1535	4615	1.25508	3.97434e-06	6.6239e-07	1.21599e-05
UP_SEQ_FEATURE	topological domain:Cytoplasmic	179	15.1695	0.000115576	CADM3, PLXNA4, GLDN, TSPAN3, LHCGR, TSPAN6, AQP7, TNFSF13, TLR4, AQP1, ADORA1, AQP3, HS2ST1, TMEM140, TAPBP, SLC2A8, MARCO, NRCAM, SLC25A20, SLC2A6, SLC2A5, SLC2A4, INSIG1, ERAP1, SLC4A2, ASPH, SCAMP5, F11R, TYRO3, RET, SCAMP3, LRRN4CL, PTPRF, HLA-A, VTI1B, PNPLA2, DHRS7B, PNPLA3, BCAP31, TMEM132C, PODXL2, MGAT3, CD36, GPBAR1, HEPACAM, ATP9A, TMEM170B, FAM171A2, CAV2, GPR146, CLCN3, EXTL3, DERL1,…	1081	823	6370	1.28164	0.262723	0.0966066	0.204927
Annotation Cluster 3	Enrichment Score: 8.984595665519599
Category	Term	Count	%	PValue	Genes	List Total	Pop Hits	Pop Total	Fold Enrichment	Bonferroni	Benjamini	FDR
SP_PIR_KEYWORDS	mitochondrion	156	13.2203	5.88184e-19	GRPEL1, PDP2, LDHD, NDUFAB1, OGDH, CLYBL, PDHB, SLC25A20, SLC25A25, STARD7, SLC25A22, MRPL38, ELOVL6, PDHA1, HADH, MRPL34, ACAA2, CRLS1, NUDT19, BCL2L13, PNPLA7, NFU1, LETM1, MRPS18C, SLC25A33, SLC25A35, YARS2, AKAP1, PCCB, TRIM39, MRPL44, MPST, HSD17B10, ME3, MRPS15, ADHFE1, MRPS11, CA5B, COX7C, OAS1, HADHA, HADHB, FIS1, MTCH2, TOMM5, ARG2, PEMT, DHODH, ALDH4A1, GCSH, MRPS27, ABCB8, PHB, AK3, C2…	1082	471	6373	1.95083	3.68203e-16	3.68203e-16	8.73745e-16
GOTERM_CC_FAT	GO:0005739~mitochondrion	191	16.1864	1.21158e-17	GRPEL1, PDP2, EHHADH, LDHD, NDUFAB1, BPHL, OGDH, CLYBL, PDHB, PECR, SLC25A20, SLC25A25, STARD7, SLC25A22, MRPL38, PRKACA, ELOVL6, PDHA1, HADH, MRPL34, PABPN1, ACAA2, CRLS1, NUDT19, BCL2L13, PNPLA7, NFU1, LETM1, MRPS18C, PSMA6, SLC25A33, SLC25A35, PLA2G2A, YARS2, AKAP1, PCCB, TRIM39, MRPL44, MPST, CAV2, HSD17B10, ME3, MRPS15, ADHFE1, MRPS11, CLU, CA5B, COX7C, OAS1, HSPA1B, HADHA, HADHB, FIS1, MTCH…	848	602	4615	1.72668	5.64595e-15	5.64595e-15	1.72744e-14
GOTERM_CC_FAT	GO:0044429~mitochondrial part	115	9.74576	2.74988e-12	GRPEL1, PDP2, LDHD, NDUFAB1, OGDH, PDHB, SLC25A20, SLC25A25, SLC25A22, PDHA1, HADH, MRPL34, ACAA2, CRLS1, LETM1, MRPS18C, SLC25A33, SLC25A35, YARS2, AKAP1, PCCB, HSD17B10, ME3, MRPS15, MRPS11, COX7C, HADHA, HADHB, FIS1, MTCH2, TOMM5, DHODH, ALDH4A1, ABCB8, PHB, AK3, UCP1, DLAT, PPIF, NDUFV3, TST, SLC25A11, TXNDC12, SARM1, UCP2, SLC25A10, RHOT1, GK, SLC25A18, PC, UQCRC2, CPT2, ATP5B, CYC1, BNIP3, …	848	341	4615	1.83535	1.28146e-09	6.40729e-10	3.92076e-09
GOTERM_CC_FAT	GO:0005740~mitochondrial envelope	84	7.11864	5.40203e-10	UQCRC2, CPT2, ATP5B, LDHD, CYC1, NDUFAB1, BNIP3, UQCRFS1, OGDH, NDUFAF3, SLC25A20, SLC25A25, MCCC1, GPX4, CASP7, SLC25A22, SLC25A1, CAT, HADH, NDUFS2, COX17, NDUFS1, ATP5J, ACAA2, CRLS1, SLC25A4, AIFM2, AIFM1, NDUFC2, CYB5A, CYB5B, ACADVL, LETM1, CYP27A1, UQCRH, SLC25A33, SLC25A35, PEBP1, AKAP1, GPAM, HSD17B10, USP30, COX7C, HK2, ATP5G3, ALDH3A2, HADHA, HADHB, FIS1, ACSL1, MTCH2, TOMM5, SH3GLB1, …	848	240	4615	1.90478	2.51735e-07	8.39115e-08	7.70209e-07
GOTERM_CC_FAT	GO:0031966~mitochondrial membrane	79	6.69492	4.16124e-09	UQCRC2, CPT2, ATP5B, LDHD, CYC1, NDUFAB1, BNIP3, UQCRFS1, OGDH, NDUFAF3, SLC25A20, SLC25A25, MCCC1, CASP7, GPX4, SLC25A22, SLC25A1, HADH, NDUFS2, NDUFS1, ATP5J, ACAA2, CRLS1, SLC25A4, AIFM2, NDUFC2, CYB5A, CYB5B, ACADVL, LETM1, CYP27A1, UQCRH, SLC25A33, SLC25A35, PEBP1, AKAP1, GPAM, HSD17B10, USP30, COX7C, HK2, ATP5G3, ALDH3A2, HADHA, HADHB, FIS1, ACSL1, MTCH2, TOMM5, SH3GLB1, BCL2, CKMT2, ETFDH,…	848	229	4615	1.87745	1.93914e-06	4.84784e-07	5.933e-06
GOTERM_CC_FAT	GO:0031090~organelle membrane	148	12.5424	2.65037e-07	HMGCR, WFS1, LDHD, NDUFAB1, OGDH, FDFT1, TAPBP, HOOK2, SLC25A20, ERO1LB, SLC25A25, SLC2A4, SLC25A22, VMA21, ELOVL6, ASPH, HADH, SCAMP5, ACAA2, CRLS1, SCAMP3, NCALD, HLA-A, VTI1B, BCAP31, LETM1, CD36, SLC25A33, ARRB1, SLC25A35, AKAP1, CAV2, HSD17B10, CLCN3, EXTL3, DERL1, GRB2, COX7C, HADHA, HADHB, FIS1, CEPT1, MTCH2, TOMM5, PEMT, DHODH, STX10, LFNG, SREBF1, ACER3, RILP, ABCB8, SEC11C, ACER2, SCD, …	848	555	4615	1.45126	0.0001235	1.23506e-05	0.000377883
GOTERM_CC_FAT	GO:0031975~envelope	101	8.55932	7.40985e-07	S100A6, LDHD, NDUFAB1, OGDH, SLC25A20, SLC25A25, GCOM1, SLC25A22, HADH, ACAA2, CRLS1, LETM1, NPC1, AAAS, SLC25A33, SLC25A35, AKAP1, HSD17B10, COX7C, HADHA, HADHB, FIS1, MTCH2, TOMM5, DHODH, SREBF1, ABCB8, SCD, PHB, UCP1, TST, NDUFV3, PPIF, TXNDC12, SLC25A11, SARM1, UCP2, SLC25A10, TSGA10, RHOT1, NUTF2, GK, SLC25A18, PC, UQCRC2, RTN4, CPT2, ATP5B, CYC1, BNIP3, UQCRFS1, NDUFAF3, MCCC1, CASP7, GPX4,…	848	350	4615	1.57047	0.000345239	3.13903e-05	0.00105647
GOTERM_CC_FAT	GO:0031967~organelle envelope	101	8.55932	7.40985e-07	S100A6, LDHD, NDUFAB1, OGDH, SLC25A20, SLC25A25, GCOM1, SLC25A22, HADH, ACAA2, CRLS1, LETM1, NPC1, AAAS, SLC25A33, SLC25A35, AKAP1, HSD17B10, COX7C, HADHA, HADHB, FIS1, MTCH2, TOMM5, DHODH, SREBF1, ABCB8, SCD, PHB, UCP1, TST, NDUFV3, PPIF, TXNDC12, SLC25A11, SARM1, UCP2, SLC25A10, TSGA10, RHOT1, NUTF2, GK, SLC25A18, PC, UQCRC2, RTN4, CPT2, ATP5B, CYC1, BNIP3, UQCRFS1, NDUFAF3, MCCC1, CASP7, GPX4,…	848	350	4615	1.57047	0.000345239	3.13903e-05	0.00105647
GOTERM_CC_FAT	GO:0005743~mitochondrial inner membrane	60	5.08475	8.24848e-07	UQCRC2, CPT2, ATP5B, LDHD, CYC1, NDUFAB1, UQCRFS1, NDUFAF3, SLC25A20, SLC25A25, GPX4, MCCC1, SLC25A22, SLC25A1, HADH, NDUFS2, NDUFS1, ATP5J, ACAA2, CRLS1, SLC25A4, NDUFC2, CYB5B, ACADVL, LETM1, CYP27A1, UQCRH, SLC25A33, SLC25A35, GPAM, HSD17B10, COX7C, ATP5G3, ALDH3A2, HADHA, HADHB, MTCH2, CKMT2, DHODH, ETFDH, SLC25A44, ACSL5, SHMT2, NDUFA3, ABCB8, PHB, PDK4, UCP1, SOD2, TST, NDUFV3, PPIF, SLC25A…	848	177	4615	1.84482	0.000384305	3.20311e-05	0.00117604
GOTERM_CC_FAT	GO:0019866~organelle inner membrane	60	5.08475	1.28628e-05	UQCRC2, CPT2, ATP5B, LDHD, CYC1, NDUFAB1, UQCRFS1, NDUFAF3, SLC25A20, SLC25A25, GPX4, MCCC1, SLC25A22, SLC25A1, HADH, NDUFS2, NDUFS1, ATP5J, ACAA2, CRLS1, SLC25A4, NDUFC2, CYB5B, ACADVL, LETM1, CYP27A1, UQCRH, SLC25A33, SLC25A35, GPAM, HSD17B10, COX7C, ATP5G3, ALDH3A2, HADHA, HADHB, MTCH2, CKMT2, DHODH, ETFDH, SLC25A44, ACSL5, SHMT2, NDUFA3, ABCB8, PHB, PDK4, UCP1, SOD2, TST, NDUFV3, PPIF, SLC25A…	848	191	4615	1.7096	0.00597619	0.00046098	0.018338
SP_PIR_KEYWORDS	mitochondrion inner membrane	38	3.22034	2.17197e-05	UQCRC2, CPT2, ATP5B, CYC1, COX7C, UQCRFS1, NDUFAF3, SLC25A20, SLC25A25, MTCH2, CKMT2, SLC25A22, DHODH, ETFDH, SLC25A44, SLC25A1, NDUFS2, NDUFS1, ATP5J, CRLS1, NDUFA3, ABCB8, SLC25A4, PHB, NDUFC2, UCP1, NDUFV3, ACADVL, SLC25A11, LETM1, SLC25A33, UQCRH, UCP2, SLC25A10, PHB2, SLC25A35, COQ10A, SLC25A18	1082	112	6373	1.9984	0.0135047	0.000970722	0.0322598
Annotation Cluster 4	Enrichment Score: 6.467095443770358
Category	Term	Count	%	PValue	Genes	List Total	Pop Hits	Pop Total	Fold Enrichment	Bonferroni	Benjamini	FDR
GOTERM_BP_FAT	GO:0006732~coenzyme metabolic process	41	3.47458	1.57937e-09	ME1, COASY, NAMPT, ALDH1L1, GCLC, TALDO1, HMGCR, PGD, ACOT2, ACOT1, GCLM, PDSS2, PDHB, GLRX2, MTHFD1, TP53I3, GPX4, IDH1, RPIA, MOCS1, GPD1, SHMT1, PDXK, ACO2, ALDH5A1, ACO1, CS, ACLY, COQ9, DLAT, COQ6, SOD2, HAGH, PANK3, G6PD, PANK1, MLYCD, QPRT, FPGS, MGST1, MDH1	867	89	4909	2.60836	5.19612e-06	1.29903e-06	2.87315e-06
GOTERM_BP_FAT	GO:0051186~cofactor metabolic process	46	3.89831	2.06874e-09	ME1, COASY, NAMPT, ALDH1L1, GCLC, TALDO1, HMGCR, PGD, UROS, ACOT2, ACOT1, GCLM, PDSS2, PDHB, GLRX2, MTHFD1, ALAS1, TP53I3, GPX4, MCCC1, IDH1, RPIA, MOCS1, GPD1, SHMT1, PDXK, ACO2, ALDH5A1, ACO1, CS, ACLY, COQ9, DLAT, MMAB, COQ6, SOD2, HAGH, NFU1, PANK3, G6PD, PANK1, MLYCD, QPRT, FPGS, MGST1, MDH1	867	107	4909	2.43415	6.80613e-06	1.36123e-06	3.7634e-06
GOTERM_BP_FAT	GO:0051188~cofactor biosynthetic process	23	1.94915	5.26032e-05	ME1, COASY, NAMPT, GCLC, PDXK, UROS, COQ9, DLAT, GCLM, PDSS2, PDHB, MMAB, COQ6, HAGH, MTHFD1, NFU1, ALAS1, PANK3, PANK1, MLYCD, QPRT, FPGS, MOCS1	867	54	4909	2.41162	0.15892	0.00493263	0.0956512
GOTERM_BP_FAT	GO:0009108~coenzyme biosynthetic process	19	1.61017	7.878e-05	ME1, COASY, NAMPT, GCLC, PDXK, COQ9, DLAT, GCLM, PDSS2, PDHB, COQ6, MTHFD1, HAGH, PANK3, PANK1, MLYCD, QPRT, FPGS, MOCS1	867	41	4909	2.62388	0.228329	0.00717405	0.143218
Annotation Cluster 5	Enrichment Score: 5.2388076241512
Category	Term	Count	%	PValue	Genes	List Total	Pop Hits	Pop Total	Fold Enrichment	Bonferroni	Benjamini	FDR
SP_PIR_KEYWORDS	lipid synthesis	36	3.05085	3.37563e-11	TM7SF2, MVD, HMGCR, HSD17B12, HINT2, HMGCS1, NDUFAB1, LSS, FDFT1, PECR, FAR2, ELOVL5, DHCR7, ELOVL3, FASN, ELOVL6, DHCR24, NSDHL, HSD17B8, EBP, MOGAT1, FADS1, SCD, PRKAB1, FDPS, FADS2, ACLY, ACACB, TECR, DGAT2, PTGDS, MLYCD, MVK, IDI1, MECR, PC	1082	67	6373	3.16479	2.11314e-08	3.5219e-09	5.01448e-08
GOTERM_BP_FAT	GO:0008203~cholesterol metabolic process	27	2.28814	5.28059e-09	TM7SF2, MVD, HMGCR, HMGCS1, APOC1, LSS, ABCA1, FDFT1, APOE, DHCR7, OSBPL1A, INSIG1, PCSK9, SCARB1, CAT, NSDHL, DHCR24, SREBF1, ACAA2, EBP, FDPS, ABCG1, G6PD, CYP27A1, MVK, IDI1, VLDLR	867	47	4909	3.25267	1.7373e-05	2.89552e-06	9.60632e-06
GOTERM_BP_FAT	GO:0016125~sterol metabolic process	27	2.28814	2.23263e-07	TM7SF2, MVD, HMGCR, HMGCS1, APOC1, LSS, ABCA1, FDFT1, APOE, DHCR7, OSBPL1A, INSIG1, PCSK9, SCARB1, CAT, NSDHL, DHCR24, SREBF1, ACAA2, EBP, FDPS, ABCG1, G6PD, CYP27A1, MVK, IDI1, VLDLR	867	54	4909	2.83103	0.000734267	7.3451e-05	0.000406155
GOTERM_BP_FAT	GO:0006695~cholesterol biosynthetic process	15	1.27119	3.47426e-07	TM7SF2, EBP, ACAA2, MVD, HMGCR, HMGCS1, FDPS, LSS, FDFT1, G6PD, DHCR7, MVK, IDI1, DHCR24, NSDHL	867	20	4909	4.24654	0.00114238	0.000103907	0.000632027
SP_PIR_KEYWORDS	Steroid biosynthesis	18	1.52542	4.74612e-07	TM7SF2, EBP, MVD, HMGCR, HSD17B12, HINT2, HMGCS1, FDPS, LSS, ACAT2, TECR, FDFT1, DHCR7, MVK, IDI1, HSD17B8, DHCR24, NSDHL	1082	29	6373	3.65587	0.000297063	2.70094e-05	0.000705032
GOTERM_BP_FAT	GO:0008202~steroid metabolic process	36	3.05085	4.11434e-06	TM7SF2, MVD, HMGCR, HSD17B14, HSD17B12, HMGCS1, APOC1, LSS, ABCA1, FDFT1, APOE, SULT1A1, DHCR7, OSBPL1A, INSIG1, PCSK9, SCARB1, CAT, NSDHL, HSD17B8, DHCR24, SREBF1, ACAA2, EBP, FDPS, DHRS9, TECR, ABCG1, NPC1, G6PD, CYP27A1, HSD11B2, OSBPL11, MVK, IDI1, VLDLR	867	94	4909	2.16845	0.013445	0.000712178	0.00748444
SP_PIR_KEYWORDS	Cholesterol biosynthesis	12	1.01695	6.07433e-06	TM7SF2, EBP, MVD, HMGCR, DHCR7, HMGCS1, FDPS, MVK, IDI1, DHCR24, FDFT1, NSDHL	1082	16	6373	4.41751	0.00379532	0.000316828	0.00902302
GOTERM_BP_FAT	GO:0006694~steroid biosynthetic process	20	1.69492	2.98552e-05	TM7SF2, ACAA2, EBP, MVD, HMGCR, HSD17B12, HMGCS1, FDPS, LSS, TECR, FDFT1, G6PD, DHCR7, HSD11B2, SCARB1, MVK, IDI1, NSDHL, HSD17B8, DHCR24	867	42	4909	2.69622	0.0935551	0.00306483	0.0542979
GOTERM_BP_FAT	GO:0016126~sterol biosynthetic process	15	1.27119	5.24676e-05	TM7SF2, EBP, ACAA2, MVD, HMGCR, HMGCS1, FDPS, LSS, FDFT1, G6PD, DHCR7, MVK, IDI1, DHCR24, NSDHL	867	27	4909	3.14559	0.158545	0.00506428	0.0954048
GOTERM_BP_FAT	GO:0006720~isoprenoid metabolic process	13	1.10169	0.000169115	RBP4, DHRS3, RBP1, MVD, HMGCR, HMGCS1, FDPS, DHRS9, MVK, IDI1, PDSS2, RETSAT, FDFT1	867	23	4909	3.20029	0.426752	0.0122891	0.307204
SP_PIR_KEYWORDS	sterol biosynthesis	12	1.01695	0.000214028	TM7SF2, EBP, MVD, HMGCR, DHCR7, HMGCS1, FDPS, MVK, IDI1, DHCR24, FDFT1, NSDHL	1082	21	6373	3.36572	0.125406	0.00741656	0.317466
GOTERM_BP_FAT	GO:0008299~isoprenoid biosynthetic process	9	0.762712	0.000230359	MVD, HMGCR, HMGCS1, FDPS, DHRS9, MVK, IDI1, PDSS2, FDFT1	867	12	4909	4.24654	0.531382	0.0144706	0.418234
KEGG_PATHWAY	hsa00900:Terpenoid backbone biosynthesis	9	0.762712	0.0015433	DHDDS, MVD, HMGCR, HMGCS1, FDPS, MVK, IDI1, ACAT2, PDSS2	427	13	2054	3.33021	0.243878	0.0305839	1.88617
KEGG_PATHWAY	hsa00100:Steroid biosynthesis	7	0.59322	0.0137221	TM7SF2, EBP, DHCR7, LSS, DHCR24, FDFT1, NSDHL	427	11	2054	3.0611	0.917989	0.129719	15.663
Annotation Cluster 6	Enrichment Score: 5.159180772626434
Category	Term	Count	%	PValue	Genes	List Total	Pop Hits	Pop Total	Fold Enrichment	Bonferroni	Benjamini	FDR
SP_PIR_KEYWORDS	lipid metabolism	37	3.13559	3.99222e-10	ACOX1, SLC27A1, ECH1, CPT2, HSD17B14, EHHADH, ECHS1, ECHDC2, ABCA1, ACSF2, HADHA, HADHB, FAR2, ACSL1, PLIN1, SULT1A1, INSIG1, PCSK9, ACSL4, HADH, ACSL5, SREBF1, CPT1B, ACAA2, MOGAT1, ACADM, ACADS, PSAP, ACER2, ADIPOR2, PNPLA2, LPIN1, ACADVL, DGAT2, SLC27A3, VLDLR, ACAA1	1082	75	6373	2.90574	2.49913e-07	3.57019e-08	5.93044e-07
SP_PIR_KEYWORDS	fatty acid metabolism	23	1.94915	2.50347e-08	ACAA2, CPT1B, SLC27A1, ACOX1, ACADM, ECH1, CPT2, ACADS, EHHADH, ADIPOR2, ECHDC2, ECHS1, LPIN1, HADHA, ACSF2, HADHB, ACADVL, ACSL1, ACSL4, SLC27A3, HADH, ACAA1, ACSL5	1082	39	6373	3.4736	1.56716e-05	1.7413e-06	3.71889e-05
GOTERM_BP_FAT	GO:0019395~fatty acid oxidation	18	1.52542	8.30007e-07	CPT1B, HACL1, ACOX1, ACADM, ECH1, CPT2, ACADS, EHHADH, ADIPOR2, ECHS1, DECR1, PPARGC1A, ADIPOQ, HADHA, HADHB, ACADVL, ETFDH, ACAA1	867	29	4909	3.51438	0.002727	0.000182032	0.00150992
GOTERM_BP_FAT	GO:0034440~lipid oxidation	18	1.52542	8.30007e-07	CPT1B, HACL1, ACOX1, ACADM, ECH1, CPT2, ACADS, EHHADH, ADIPOR2, ECHS1, DECR1, PPARGC1A, ADIPOQ, HADHA, HADHB, ACADVL, ETFDH, ACAA1	867	29	4909	3.51438	0.002727	0.000182032	0.00150992
KEGG_PATHWAY	hsa00071:Fatty acid metabolism	20	1.69492	8.53685e-07	ACAA2, CPT1B, ACOX1, ACADM, CPT2, ACADS, EHHADH, ECHS1, ACAT2, ALDH3A2, HADHA, HADHB, ACADVL, ACSL1, ALDH1B1, ACSL4, HADH, ALDH9A1, ACAA1, ACSL5	427	31	2054	3.10342	0.000154505	7.72555e-05	0.00105249
GOTERM_BP_FAT	GO:0016042~lipid catabolic process	31	2.62712	2.65925e-06	HACL1, ACOX1, ECH1, CPT2, HSD17B14, EHHADH, PLBD1, ECHS1, HADHA, HADHB, APOE, PLIN1, PLA2G12A, ETFDH, PLCD4, PLCD1, SCARB1, CPT1B, LPL, PLA2G16, ACADM, ACADS, PNPLA2, DECR1, ADIPOQ, PNPLA3, PNPLA7, ACADVL, PRDX6, PLA2G2A, ACAA1	867	74	4909	2.37194	0.00871079	0.000485935	0.00483753
GOTERM_BP_FAT	GO:0009062~fatty acid catabolic process	16	1.35593	4.95406e-06	CPT1B, HACL1, ACOX1, ACADM, ECH1, CPT2, ACADS, EHHADH, ECHS1, DECR1, ADIPOQ, HADHA, HADHB, ACADVL, ETFDH, ACAA1	867	26	4909	3.48434	0.0161668	0.000775837	0.00901193
GOTERM_BP_FAT	GO:0046395~carboxylic acid catabolic process	27	2.28814	8.3944e-06	HACL1, ACOX1, CPT2, ECH1, EHHADH, ECHS1, HADHA, HADHB, FAH, MTHFD1, ASPA, MCCC1, ETFDH, GCSH, DMGDH, ALDH4A1, ACAD8, CPT1B, SHMT1, ACADM, ACADS, DECR1, CDO1, ADIPOQ, ACADVL, HIBCH, ACAA1	867	63	4909	2.42659	0.0272398	0.00125456	0.0152698
GOTERM_BP_FAT	GO:0016054~organic acid catabolic process	27	2.28814	8.3944e-06	HACL1, ACOX1, CPT2, ECH1, EHHADH, ECHS1, HADHA, HADHB, FAH, MTHFD1, ASPA, MCCC1, ETFDH, GCSH, DMGDH, ALDH4A1, ACAD8, CPT1B, SHMT1, ACADM, ACADS, DECR1, CDO1, ADIPOQ, ACADVL, HIBCH, ACAA1	867	63	4909	2.42659	0.0272398	0.00125456	0.0152698
GOTERM_BP_FAT	GO:0030258~lipid modification	19	1.61017	1.40134e-05	CPT1B, HACL1, ACOX1, ACADM, ECH1, CPT2, ACADS, EHHADH, ADIPOR2, ECHS1, DECR1, PPARGC1A, ADIPOQ, HADHA, HADHB, ACADVL, ETFDH, PIK3CA, ACAA1	867	37	4909	2.90754	0.0450578	0.00184248	0.0254898
GOTERM_BP_FAT	GO:0006635~fatty acid beta-oxidation	15	1.27119	1.65629e-05	CPT1B, ACOX1, ACADM, ECH1, CPT2, ACADS, EHHADH, ECHS1, DECR1, ADIPOQ, HADHA, HADHB, ACADVL, ETFDH, ACAA1	867	25	4909	3.39723	0.0530343	0.0020162	0.0301266
GOTERM_BP_FAT	GO:0044242~cellular lipid catabolic process	19	1.61017	0.000115474	CPT1B, HACL1, ACOX1, LPL, ACADM, ECH1, CPT2, ACADS, EHHADH, ECHS1, DECR1, PNPLA3, ADIPOQ, HADHA, HADHB, ACADVL, PRDX6, ETFDH, ACAA1	867	42	4909	2.5614	0.316091	0.00900517	0.209858
GOTERM_BP_FAT	GO:0009310~amine catabolic process	13	1.10169	0.04574	SHMT1, ACHE, LRTOMT, CDO1, FAH, MTHFD1, ASPA, MCCC1, DMGDH, ALDH4A1, GCSH, ACAD8, HIBCH	867	41	4909	1.79529	1	0.629823	57.332
GOTERM_BP_FAT	GO:0009063~cellular amino acid catabolic process	11	0.932203	0.0883268	MTHFD1, SHMT1, ASPA, MCCC1, ALDH4A1, GCSH, DMGDH, ACAD8, HIBCH, CDO1, FAH	867	36	4909	1.73007	1	0.800058	81.4047
Annotation Cluster 7	Enrichment Score: 4.576090077939416
Category	Term	Count	%	PValue	Genes	List Total	Pop Hits	Pop Total	Fold Enrichment	Bonferroni	Benjamini	FDR
GOTERM_CC_FAT	GO:0005792~microsome	44	3.72881	4.1467e-08	SLC27A1, TALDO1, HMGCR, PDE3B, LSS, OAS1, CALR, TAPBP, FDFT1, LNPEP, POMGNT1, ACSL1, SLC2A4, SH3GLB1, BCL2, SRD5A3, ACSL4, ACSL5, AKT2, CPT1B, EBP, PTPRF, SEC11C, AIFM1, FADS1, EPHX1, DHRS9, CYB5A, ATP1A2, CYB5B, CYP4F12, CHPT1, POR, PNPLA7, MGST3, RDH10, HSP90B1, ADRB2, DGAT1, DGAT2, VCP, HSD11B2, SORT1, MGST1	848	105	4615	2.28055	1.93235e-05	2.41545e-06	5.91228e-05
GOTERM_CC_FAT	GO:0042598~vesicular fraction	44	3.72881	1.09809e-07	SLC27A1, TALDO1, HMGCR, PDE3B, LSS, OAS1, CALR, TAPBP, FDFT1, LNPEP, POMGNT1, ACSL1, SLC2A4, SH3GLB1, BCL2, SRD5A3, ACSL4, ACSL5, AKT2, CPT1B, EBP, PTPRF, SEC11C, AIFM1, FADS1, EPHX1, DHRS9, CYB5A, ATP1A2, CYB5B, CYP4F12, CHPT1, POR, PNPLA7, MGST3, RDH10, HSP90B1, ADRB2, DGAT1, DGAT2, VCP, HSD11B2, SORT1, MGST1	848	108	4615	2.2172	5.11696e-05	5.68564e-06	0.000156563
GOTERM_CC_FAT	GO:0000267~cell fraction	114	9.66102	0.000172598	SEPT5, HMGCR, PPP2R5A, UTRN, PDE3B, CD52, TAPBP, FDFT1, PRKAR2B, PRKAR2A, PGP, SLC2A4, SLC4A2, PRKACA, PTPRF, CRYAB, CHPT1, POR, PNPLA7, CD36, ARRB1, HSD11B2, MDH1, ME1, CAV2, TALDO1, MMD, HMGCS1, AKAP13, MME, OAS1, ABCA1, POMC, CALR, GCLM, SLC29A1, PEMT, IDH1, SCARB1, GPD1, ABCB8, SEC11C, EPHX1, PPIF, GPR34, VCP, FABP4, PC, SLC27A1, HIP1R, LSS, AKT1, LNPEP, SLC1A5, POMGNT1, SLC24A2, CASP7, GPX4,…	848	455	4615	1.36354	0.0772877	0.00501474	0.245805
GOTERM_CC_FAT	GO:0005624~membrane fraction	87	7.37288	0.000345255	SEPT5, SLC27A1, PPP2R5A, HIP1R, HMGCR, UTRN, PDE3B, LSS, CD52, TAPBP, FDFT1, LNPEP, PRKAR2B, SLC1A5, PRKAR2A, PGP, POMGNT1, SLC2A4, SLC24A2, SRD5A3, SLC22A3, PRKACA, SLC4A2, AKT2, PTPRF, AIFM1, KTN1, DHRS9, CYB5A, CYB5B, CHPT1, POR, MCTP1, PNPLA7, ADRB2, CD36, DGAT1, DGAT2, ARRB1, SORT1, HSD11B2, PEBP1, CAV2, TALDO1, MMD, AKAP13, MME, OAS1, ABCA1, CALR, SLC19A1, SLC29A1, ACSL1, BEST1, SH3GLB1, BC…	848	335	4615	1.41335	0.148637	0.00942103	0.491132
GOTERM_CC_FAT	GO:0005626~insoluble fraction	89	7.54237	0.000913139	SEPT5, SLC27A1, PPP2R5A, HIP1R, HMGCR, UTRN, PDE3B, LSS, CD52, TAPBP, FDFT1, LNPEP, PRKAR2B, SLC1A5, PRKAR2A, PGP, POMGNT1, SLC2A4, SLC24A2, SRD5A3, SLC22A3, PRKACA, SLC4A2, AKT2, PTPRF, CRYAB, AIFM1, KTN1, DHRS9, CYB5A, CYB5B, CHPT1, POR, MCTP1, PNPLA7, ADRB2, CD36, DGAT1, DGAT2, ARRB1, SORT1, HSD11B2, PEBP1, CAV2, TALDO1, MMD, AKAP13, MME, OAS1, ABCA1, CALR, SLC19A1, SLC29A1, ACSL1, BEST1, SH3G…	848	354	4615	1.36824	0.346699	0.022157	1.29408
SP_PIR_KEYWORDS	microsome	15	1.27119	0.00141061	SEC11C, DHRS9, EPHX1, CYB5A, OAS1, CYP4F12, TAPBP, PNPLA7, MGST3, RDH10, ACSL1, SRD5A3, HSD11B2, ACSL4, MGST1	1082	36	6373	2.45417	0.586734	0.0310666	2.0751
Annotation Cluster 8	Enrichment Score: 4.509614123540952
Category	Term	Count	%	PValue	Genes	List Total	Pop Hits	Pop Total	Fold Enrichment	Bonferroni	Benjamini	FDR
GOTERM_MF_FAT	GO:0033293~monocarboxylic acid binding	17	1.44068	1.50134e-05	ACADS, PPARG, APOC1, NDUFAB1, ACACB, DBI, HADHA, ACBD4, HADHB, DGAT1, PYGL, SH3GLB1, MCCC1, FABP3, FABP4, FABP5, PC	816	31	4649	3.12433	0.0176927	0.0059327	0.0242412
GOTERM_MF_FAT	GO:0031406~carboxylic acid binding	28	2.37288	2.18917e-05	GCLC, PPARG, APOC1, NDUFAB1, SLC19A3, SLC19A1, HADHA, ACBD4, HADHB, SH3GLB1, MCCC1, FASN, GCSH, DMGDH, PDHX, GCHFR, SHMT1, ACADS, ACACB, DLAT, DBI, PCK1, DGAT1, PYGL, FABP3, FABP4, FABP5, PC	816	70	4649	2.27892	0.0256937	0.00648625	0.0353452
GOTERM_MF_FAT	GO:0005504~fatty acid binding	13	1.10169	9.00323e-05	ACADS, PPARG, NDUFAB1, APOC1, DBI, HADHA, ACBD4, HADHB, DGAT1, SH3GLB1, FABP3, FABP4, FABP5	816	22	4649	3.36659	0.101522	0.015177	0.145286
Annotation Cluster 9	Enrichment Score: 4.303154312117069
Category	Term	Count	%	PValue	Genes	List Total	Pop Hits	Pop Total	Fold Enrichment	Bonferroni	Benjamini	FDR
GOTERM_BP_FAT	GO:0019216~regulation of lipid metabolic process	27	2.28814	1.91238e-06	CPT2, STAT5A, PPARG, LHCGR, APOC1, PDE3B, ADORA1, AKT1, SLC25A20, ACSL1, SORBS1, APOE, AGT, DHCR7, IL1B, NR1H3, AKT2, CPT1B, PRKAB1, MLXIPL, PNPLA2, ACACB, ADIPOQ, PPARGC1A, ABCG1, NPC2, MLYCD	867	59	4909	2.59111	0.00627197	0.000393156	0.00347889
GOTERM_BP_FAT	GO:0019217~regulation of fatty acid metabolic process	16	1.35593	4.95406e-06	CPT1B, CPT2, PPARG, PRKAB1, MLXIPL, APOC1, ACACB, PPARGC1A, ADIPOQ, AKT1, SLC25A20, ACSL1, MLYCD, AGT, AKT2, NR1H3	867	26	4909	3.48434	0.0161668	0.000775837	0.00901193
GOTERM_BP_FAT	GO:0010565~regulation of cellular ketone metabolic process	16	1.35593	1.68688e-05	CPT1B, CPT2, PPARG, PRKAB1, MLXIPL, APOC1, ACACB, PPARGC1A, ADIPOQ, AKT1, SLC25A20, ACSL1, MLYCD, AGT, AKT2, NR1H3	867	28	4909	3.23546	0.053987	0.00198014	0.0306829
GOTERM_BP_FAT	GO:0045834~positive regulation of lipid metabolic process	14	1.18644	9.41095e-05	PPARG, MLXIPL, APOC1, PNPLA2, PPARGC1A, ADIPOQ, ABCG1, AKT1, SORBS1, APOE, AGT, IL1B, AKT2, NR1H3	867	25	4909	3.17075	0.266285	0.00771098	0.171063
GOTERM_BP_FAT	GO:0046320~regulation of fatty acid oxidation	11	0.932203	0.000309056	AKT1, CPT1B, SLC25A20, CPT2, ACSL1, MLYCD, PPARG, PRKAB1, ACACB, PPARGC1A, AKT2	867	18	4909	3.46014	0.638304	0.017996	0.560736
GOTERM_BP_FAT	GO:0045923~positive regulation of fatty acid metabolic process	7	0.59322	0.00326425	AGT, PPARG, MLXIPL, PPARGC1A, ADIPOQ, AKT2, NR1H3	867	10	4909	3.96344	0.999979	0.118872	5.77452
Annotation Cluster 10	Enrichment Score: 3.9160197727909067
Category	Term	Count	%	PValue	Genes	List Total	Pop Hits	Pop Total	Fold Enrichment	Bonferroni	Benjamini	FDR
GOTERM_BP_FAT	GO:0006006~glucose metabolic process	39	3.30508	1.59483e-08	ALDOA, RBP4, TALDO1, PFKFB2, PFKFB1, PGD, HK2, OGDH, G6PC3, PDHB, SLC2A8, AKT1, PPP1R3B, PPP1R1A, PIK3CA, PDHA1, RPIA, DHTKD1, PDK1, GPD1, ALDH5A1, CRYAB, PDK4, GYG2, DLAT, ADIPOQ, PPARGC1A, PCK1, ATF4, G6PD, GBE1, ATF3, PYGM, PYGL, SLC25A10, PGM1, GPT, MDH1, PC	867	88	4909	2.50932	5.24685e-05	7.49567e-06	2.90127e-05
GOTERM_BP_FAT	GO:0006090~pyruvate metabolic process	19	1.61017	5.17598e-08	GPD1, RBP4, ME3, PFKFB2, PFKFB1, DLAT, PPARGC1A, G6PC3, PDHB, PCK1, ATF4, ATF3, SLC16A7, SLC25A10, PGM1, GPT, PDHA1, PDHX, PC	867	28	4909	3.84211	0.000170275	2.1286e-05	9.41602e-05
GOTERM_BP_FAT	GO:0005996~monosaccharide metabolic process	46	3.89831	4.09081e-07	ALDOA, RBP4, TALDO1, GNE, PFKFB3, PFKFB2, FN3K, PFKFB1, PGD, HK2, OGDH, PDHB, G6PC3, AKT1, SLC2A8, PPP1R3B, PPP1R1A, PIK3CA, PDHA1, RPIA, DHTKD1, PDK1, GPD1, ALDH5A1, CRYAB, PDK4, CHST2, GYG2, DLAT, ADIPOQ, PPARGC1A, PCK1, MAN2C1, AMDHD2, ATF4, G6PD, GBE1, ATF3, PYGM, PYGL, GFPT1, SLC25A10, PGM1, GPT, MDH1, PC	867	124	4909	2.10044	0.00134497	0.00011215	0.000744188
GOTERM_BP_FAT	GO:0019318~hexose metabolic process	42	3.55932	5.95389e-07	ALDOA, RBP4, TALDO1, PFKFB3, PFKFB2, PFKFB1, PGD, HK2, OGDH, PDHB, G6PC3, AKT1, SLC2A8, PPP1R3B, PPP1R1A, PIK3CA, PDHA1, RPIA, DHTKD1, PDK1, GPD1, ALDH5A1, CRYAB, PDK4, GYG2, DLAT, ADIPOQ, PPARGC1A, PCK1, MAN2C1, ATF4, G6PD, GBE1, ATF3, PYGM, PYGL, SLC25A10, GFPT1, PGM1, GPT, MDH1, PC	867	110	4909	2.16187	0.00195691	0.000139907	0.00108311
GOTERM_BP_FAT	GO:0006094~gluconeogenesis	12	1.01695	8.94473e-06	GPD1, RBP4, ATF4, ATF3, SLC25A10, PGM1, PFKFB1, GPT, PPARGC1A, G6PC3, PC, PCK1	867	16	4909	4.24654	0.0289995	0.00127867	0.0162708
GOTERM_BP_FAT	GO:0046364~monosaccharide biosynthetic process	15	1.27119	1.65629e-05	RBP4, GPD1, PGD, PFKFB1, PPARGC1A, G6PC3, PCK1, ATF4, ATF3, G6PD, PYGL, SLC25A10, PGM1, GPT, PC	867	25	4909	3.39723	0.0530343	0.0020162	0.0301266
GOTERM_BP_FAT	GO:0034637~cellular carbohydrate biosynthetic process	20	1.69492	1.95347e-05	GPD1, RBP4, GNE, PGD, PFKFB1, GYG2, PPARGC1A, G6PC3, HS2ST1, PCK1, AKT1, ATF4, ATF3, G6PD, GBE1, PYGL, SLC25A10, PGM1, GPT, PC	867	41	4909	2.76198	0.0622482	0.00221375	0.0355312
GOTERM_BP_FAT	GO:0046165~alcohol biosynthetic process	15	1.27119	5.24676e-05	RBP4, GPD1, PGD, PFKFB1, PPARGC1A, G6PC3, PCK1, ATF4, ATF3, G6PD, PYGL, SLC25A10, PGM1, GPT, PC	867	27	4909	3.14559	0.158545	0.00506428	0.0954048
GOTERM_BP_FAT	GO:0019319~hexose biosynthetic process	12	1.01695	0.00017229	GPD1, RBP4, ATF4, ATF3, SLC25A10, PGM1, PFKFB1, GPT, PPARGC1A, G6PC3, PC, PCK1	867	20	4909	3.39723	0.432709	0.0119889	0.312962
GOTERM_BP_FAT	GO:0006007~glucose catabolic process	15	1.27119	0.000514401	ALDOA, TALDO1, G6PD, PFKFB2, PGD, PFKFB1, PGM1, HK2, PDHA1, RPIA, DLAT, OGDH, DHTKD1, PDHB, MDH1	867	32	4909	2.65409	0.815999	0.0273695	0.931659
GOTERM_BP_FAT	GO:0044275~cellular carbohydrate catabolic process	18	1.52542	0.000771904	ALDOA, GPD1, TALDO1, PFKFB2, PFKFB1, PGD, HK2, DLAT, OGDH, PDHB, G6PD, PYGM, PYGL, PGM1, RPIA, PDHA1, DHTKD1, MDH1	867	44	4909	2.31629	0.921177	0.0372087	1.39495
GOTERM_BP_FAT	GO:0016051~carbohydrate biosynthetic process	22	1.86441	0.0009067	GPD1, RBP4, GNE, PGD, PFKFB1, GYG2, PPARGC1A, G6PC3, HS2ST1, PCK1, AKT1, ATF4, ATF3, G6PD, GBE1, PYGL, GFPT1, SLC25A10, CHST8, PGM1, GPT, PC	867	60	4909	2.07609	0.94943	0.0423301	1.63665
GOTERM_BP_FAT	GO:0046164~alcohol catabolic process	17	1.44068	0.00130923	ALDOA, GPD1, TALDO1, G6PD, PFKFB2, PGD, PFKFB1, PGM1, HK2, LRTOMT, PDHA1, RPIA, DLAT, OGDH, DHTKD1, PDHB, MDH1	867	42	4909	2.29178	0.986569	0.0573343	2.3551
GOTERM_BP_FAT	GO:0016052~carbohydrate catabolic process	19	1.61017	0.00143484	ALDOA, GPD1, TALDO1, PFKFB2, PFKFB1, PGD, HK2, CHI3L2, DLAT, OGDH, PDHB, G6PD, PYGM, PYGL, PGM1, RPIA, PDHA1, DHTKD1, MDH1	867	50	4909	2.15158	0.99112	0.0602655	2.57827
GOTERM_BP_FAT	GO:0046365~monosaccharide catabolic process	15	1.27119	0.00206579	ALDOA, TALDO1, G6PD, PFKFB2, PGD, PFKFB1, PGM1, HK2, PDHA1, RPIA, DLAT, OGDH, DHTKD1, PDHB, MDH1	867	36	4909	2.35919	0.99889	0.0815278	3.69205
GOTERM_BP_FAT	GO:0019320~hexose catabolic process	15	1.27119	0.00206579	ALDOA, TALDO1, G6PD, PFKFB2, PGD, PFKFB1, PGM1, HK2, PDHA1, RPIA, DLAT, OGDH, DHTKD1, PDHB, MDH1	867	36	4909	2.35919	0.99889	0.0815278	3.69205
GOTERM_BP_FAT	GO:0006096~glycolysis	10	0.847458	0.0220374	ALDOA, PGM1, PFKFB1, HK2, PDHA1, DLAT, OGDH, DHTKD1, PDHB, MDH1	867	25	4909	2.26482	1	0.431045	33.3278
KEGG_PATHWAY	hsa00010:Glycolysis / Gluconeogenesis	12	1.01695	0.0755236	ALDOA, ALDH1B1, PGM1, HK2, ALDH3B2, PDHA1, DLAT, ACSS2, ALDH3A2, ALDH9A1, PDHB, PCK1	427	34	2054	1.69775	0.999999	0.446908	62.0218
SP_PIR_KEYWORDS	glycolysis	7	0.59322	0.155984	ALDOA, HK2, PDHA1, DLAT, OGDH, DHTKD1, PDHB	1082	22	6373	1.8741	1	0.717423	91.9473
Annotation Cluster 11	Enrichment Score: 3.8352511408886554
Category	Term	Count	%	PValue	Genes	List Total	Pop Hits	Pop Total	Fold Enrichment	Bonferroni	Benjamini	FDR
SP_PIR_KEYWORDS	peroxisome	28	2.37288	1.25456e-08	ACOX1, HACL1, ECH1, HMGCR, EHHADH, ACOT2, PRDX5, FAR2, PECR, FIS1, ACSL1, PEX19, NUDT7, ABCD2, IDH1, ABCD4, CAT, ACSL4, NUDT19, DHRS7B, PEX11A, HSDL2, MLYCD, TYSND1, MVK, IDI1, ACAD11, ACAA1	1082	53	6373	3.11171	7.85354e-06	9.81696e-07	1.86365e-05
GOTERM_CC_FAT	GO:0042579~microbody	30	2.54237	2.2536e-08	HACL1, ACOX1, ECH1, MVD, HMGCR, EHHADH, PRDX5, FAR2, PECR, FIS1, ACSL1, PEX19, NUDT7, ABCD2, IDH1, ABCD4, CAT, ACSL4, ACSL5, NUDT19, ISOC1, DHRS7B, PEX11A, MLYCD, TYSND1, MVK, IDI1, ACAD11, MGST1, ACAA1	848	57	4615	2.86432	1.05017e-05	1.50025e-06	3.21314e-05
GOTERM_CC_FAT	GO:0005777~peroxisome	30	2.54237	2.2536e-08	HACL1, ACOX1, ECH1, MVD, HMGCR, EHHADH, PRDX5, FAR2, PECR, FIS1, ACSL1, PEX19, NUDT7, ABCD2, IDH1, ABCD4, CAT, ACSL4, ACSL5, NUDT19, ISOC1, DHRS7B, PEX11A, MLYCD, TYSND1, MVK, IDI1, ACAD11, MGST1, ACAA1	848	57	4615	2.86432	1.05017e-05	1.50025e-06	3.21314e-05
GOTERM_CC_FAT	GO:0044438~microbody part	11	0.932203	0.00669202	PEX11A, FAR2, ACOX1, FIS1, ACSL1, PEX19, MVD, ABCD2, CAT, MGST1, ACAA1	848	24	4615	2.49435	0.956237	0.113385	9.12943
GOTERM_CC_FAT	GO:0044439~peroxisomal part	11	0.932203	0.00669202	PEX11A, FAR2, ACOX1, FIS1, ACSL1, PEX19, MVD, ABCD2, CAT, MGST1, ACAA1	848	24	4615	2.49435	0.956237	0.113385	9.12943
GOTERM_CC_FAT	GO:0005778~peroxisomal membrane	8	0.677966	0.033419	PEX11A, ACOX1, FIS1, ACSL1, PEX19, ABCD2, CAT, MGST1	848	18	4615	2.41876	1	0.381206	38.4072
GOTERM_CC_FAT	GO:0031903~microbody membrane	8	0.677966	0.033419	PEX11A, ACOX1, FIS1, ACSL1, PEX19, ABCD2, CAT, MGST1	848	18	4615	2.41876	1	0.381206	38.4072
GOTERM_BP_FAT	GO:0007031~peroxisome organization	3	0.254237	0.652591	PEX11A, FIS1, PEX19	867	12	4909	1.41551	1	0.999818	100
Annotation Cluster 12	Enrichment Score: 3.8124425573714134
Category	Term	Count	%	PValue	Genes	List Total	Pop Hits	Pop Total	Fold Enrichment	Bonferroni	Benjamini	FDR
SP_PIR_KEYWORDS	endoplasmic reticulum	94	7.9661	2.85738e-05	RTN4, TM7SF2, HMGCR, WFS1, BSCL2, PDIA4, ALG9, TAPBP, RTN3, FDFT1, FAR2, ERO1LB, PSKH1, ELOVL5, FITM2, ELOVL3, AGPAT9, INSIG1, VMA21, SRD5A3, ERAP1, ELOVL6, ASPH, DHCR24, LPGAT1, AIFM1, KTN1, DHRS9, CYB5A, METTL7A, LPIN1, LPCAT3, TECR, POR, BCAP31, PNPLA7, DGAT1, DGAT2, PTGDS, RASGRF2, SURF4, SORT1, HSD11B2, ORMDL3, FCRLB, SEC23B, EXTL3, DERL1, MRAP, HSD17B12, OAS1, CALR, G6PC3, ALDH3A2, CEPT1, A…	1082	371	6373	1.49235	0.0177284	0.00119178	0.0424378
GOTERM_CC_FAT	GO:0005783~endoplasmic reticulum	123	10.4237	4.0098e-05	HMGCR, WFS1, LHCGR, PDE3B, ADORA1, FDFT1, TAPBP, ERO1LB, PSKH1, ELOVL5, AQP11, ELOVL3, INSIG1, VMA21, ERAP1, ELOVL6, ASPH, TECR, LPCAT3, POR, BCAP31, PNPLA7, NPC1, RASGRF2, SURF4, PLA2G2A, HSD11B2, HSD17B10, EXTL3, DERL1, MAMDC2, MRAP, HSD17B12, APOC1, OAS1, HSPA1B, CALR, G6PC3, CEPT1, PTPLB, PEMT, ARL6IP5, SREBF1, ACER3, SEC11C, ACER2, SCD, EPHX1, PSMB8, ABCG1, TXNDC12, HYOU1, TXNDC11, DNAJB9, V…	848	483	4615	1.38591	0.0185125	0.00124496	0.0571556
GOTERM_CC_FAT	GO:0044432~endoplasmic reticulum part	47	3.98305	0.00318847	TM7SF2, RTN4, EXTL3, DERL1, HMGCR, WFS1, BSCL2, PDIA4, CALR, ALG9, HLA-DMA, TAPBP, FDFT1, ERO1LB, CEPT1, CASP7, BCL2, DHCR7, AGPAT9, PEMT, VMA21, ERAP1, HSPA5, ASPH, ELOVL6, DHCR24, NSDHL, SREBF1, ACER3, CES2, CES1, SEC11C, AIFM1, ACER2, DHRS9, KTN1, CYP4F12, PSMB8, BCAP31, RDH5, HYOU1, TXNDC12, HSP90B1, SDF2L1, ALG12, SEC23B, RETSAT	848	171	4615	1.49581	0.774221	0.0626555	4.4512
Annotation Cluster 13	Enrichment Score: 3.3994767430225474
Category	Term	Count	%	PValue	Genes	List Total	Pop Hits	Pop Total	Fold Enrichment	Bonferroni	Benjamini	FDR
UP_SEQ_FEATURE	topological domain:Cytoplasmic	179	15.1695	0.000115576	CADM3, PLXNA4, GLDN, TSPAN3, LHCGR, TSPAN6, AQP7, TNFSF13, TLR4, AQP1, ADORA1, AQP3, HS2ST1, TMEM140, TAPBP, SLC2A8, MARCO, NRCAM, SLC25A20, SLC2A6, SLC2A5, SLC2A4, INSIG1, ERAP1, SLC4A2, ASPH, SCAMP5, F11R, TYRO3, RET, SCAMP3, LRRN4CL, PTPRF, HLA-A, VTI1B, PNPLA2, DHRS7B, PNPLA3, BCAP31, TMEM132C, PODXL2, MGAT3, CD36, GPBAR1, HEPACAM, ATP9A, TMEM170B, FAM171A2, CAV2, GPR146, CLCN3, EXTL3, DERL1,…	1081	823	6370	1.28164	0.262723	0.0966066	0.204927
UP_SEQ_FEATURE	glycosylation site:N-linked (GlcNAc...)	225	19.0678	0.000549318	CADM3, GLDN, BTD, EFNA1, LHCGR, CD52, AQP1, ADORA1, AQP3, HS2ST1, TMEM140, ERO1LB, APOD, AQP11, ERAP1, MATN2, F11R, TYRO3, PTPRF, SERPING1, TMEM132C, NPC1, ADAMTS9, MGAT3, NPC2, EGFLAM, CD36, HEPACAM, SERPINF1, GPBAR1, TMEM170B, PMP22, GPR146, CLCN3, CRELD1, IGFBPL1, PTH1R, MME, HFE, FCGRT, CALR, POMC, SYPL2, EPHB2, SLC29A1, TMEM129, LGALS3BP, SLC29A2, SLC29A4, BAI2, OLFM2, LFNG, PLTP, ACER3, PCN…	1081	1097	6370	1.20862	0.765183	0.148703	0.970461
UP_SEQ_FEATURE	topological domain:Extracellular	119	10.0847	0.000997421	CADM3, PLXNA4, GLDN, TSPAN3, LHCGR, TSPAN6, AQP7, TNFSF13, TLR4, AQP1, ADORA1, AQP3, TMEM140, SLC2A8, NRCAM, MARCO, SLC2A6, SLC2A5, SLC2A4, SLC4A2, SCAMP5, F11R, TYRO3, RET, LRRN4CL, PTPRF, HLA-A, TMEM132C, PODXL2, CD36, GPBAR1, HEPACAM, ATP9A, TMEM170B, FAM171A2, GPR146, ABCA7, CRELD1, MRAP, PTH1R, HFE, LRIG1, MME, FCGRT, ABCA1, EPHB2, SLC29A1, TMEM129, SLC29A4, BAI2, SCARB1, TMEM97, SLCO4C1, KL…	1081	537	6370	1.30583	0.92803	0.196913	1.75552
Annotation Cluster 14	Enrichment Score: 3.3905691387125145
Category	Term	Count	%	PValue	Genes	List Total	Pop Hits	Pop Total	Fold Enrichment	Bonferroni	Benjamini	FDR
KEGG_PATHWAY	hsa00071:Fatty acid metabolism	20	1.69492	8.53685e-07	ACAA2, CPT1B, ACOX1, ACADM, CPT2, ACADS, EHHADH, ECHS1, ACAT2, ALDH3A2, HADHA, HADHB, ACADVL, ACSL1, ALDH1B1, ACSL4, HADH, ALDH9A1, ACAA1, ACSL5	427	31	2054	3.10342	0.000154505	7.72555e-05	0.00105249
KEGG_PATHWAY	hsa00650:Butanoate metabolism	14	1.18644	8.72817e-05	ACADS, ALDH5A1, EHHADH, HMGCS1, ECHS1, ACAT2, ALDH3A2, PDHB, HADHA, L2HGDH, ALDH1B1, PDHA1, HADH, ALDH9A1	427	22	2054	3.0611	0.0156745	0.00315475	0.107555
KEGG_PATHWAY	hsa00280:Valine, leucine and isoleucine degradation	19	1.61017	0.000190515	ACAA2, HSD17B10, ACADM, ACADS, EHHADH, HMGCS1, ECHS1, ACAT2, ALDH3A2, HADHA, HADHB, ALDH1B1, MCCC1, ACAD8, HIBCH, HADH, PCCB, ALDH9A1, ACAA1	427	38	2054	2.40515	0.0338986	0.00573127	0.234631
KEGG_PATHWAY	hsa00640:Propanoate metabolism	13	1.10169	0.000256942	ACADM, EHHADH, ECHS1, ACACB, ACAT2, ACSS2, ALDH3A2, HADHA, ALDH1B1, MLYCD, HIBCH, PCCB, ALDH9A1	427	21	2054	2.97781	0.0454474	0.00662261	0.31632
KEGG_PATHWAY	hsa00410:beta-Alanine metabolism	11	0.932203	0.000319212	ACADM, MLYCD, ALDH1B1, EHHADH, ECHS1, HIBCH, AOC2, ALDH3A2, HADHA, ALDH9A1, AOC3	427	16	2054	3.30708	0.0561487	0.00719731	0.392842
KEGG_PATHWAY	hsa00903:Limonene and pinene degradation	7	0.59322	0.00364933	ALDH1B1, EHHADH, ECHS1, PNPLA3, ALDH3A2, HADHA, ALDH9A1	427	9	2054	3.74135	0.484046	0.049629	4.40737
KEGG_PATHWAY	hsa00380:Tryptophan metabolism	10	0.847458	0.00824181	ALDH1B1, EHHADH, ECHS1, CAT, OGDH, HADH, ACAT2, ALDH3A2, HADHA, ALDH9A1	427	19	2054	2.53174	0.776412	0.0843441	9.70006
KEGG_PATHWAY	hsa00310:Lysine degradation	11	0.932203	0.0214361	ALDH1B1, EHHADH, ECHS1, SETD7, OGDH, HADH, ACAT2, ALDH3A2, HADHA, ALDH9A1, BBOX1	427	25	2054	2.11653	0.980201	0.186515	23.4447
Annotation Cluster 15	Enrichment Score: 3.2885479596831595
Category	Term	Count	%	PValue	Genes	List Total	Pop Hits	Pop Total	Fold Enrichment	Bonferroni	Benjamini	FDR
GOTERM_BP_FAT	GO:0015909~long-chain fatty acid transport	9	0.762712	9.08273e-05	CPT1B, SLC25A20, CPT2, CD36, PLIN2, PPARG, LHCGR, ANXA1, FABP3	867	11	4909	4.63259	0.258318	0.00763316	0.165102
GOTERM_BP_FAT	GO:0015849~organic acid transport	23	1.94915	0.000555254	CPT1B, CPT2, SLC25A4, PPARG, LHCGR, SLC3A2, ANXA1, SLC7A10, SLC19A1, SLC1A4, SLC1A5, SLC25A20, CD36, SLC16A7, PLIN2, SLC25A10, SLC25A22, FABP3, SLC5A6, SLC25A1, SLC22A5, ARL6IP5, SLC43A2	867	62	4909	2.10044	0.839152	0.028588	1.0053
GOTERM_BP_FAT	GO:0046942~carboxylic acid transport	23	1.94915	0.000555254	CPT1B, CPT2, SLC25A4, PPARG, LHCGR, SLC3A2, ANXA1, SLC7A10, SLC19A1, SLC1A4, SLC1A5, SLC25A20, CD36, SLC16A7, PLIN2, SLC25A10, SLC25A22, FABP3, SLC5A6, SLC25A1, SLC22A5, ARL6IP5, SLC43A2	867	62	4909	2.10044	0.839152	0.028588	1.0053
GOTERM_BP_FAT	GO:0015908~fatty acid transport	9	0.762712	0.00100013	CPT1B, SLC25A20, CPT2, CD36, PLIN2, PPARG, LHCGR, ANXA1, FABP3	867	14	4909	3.63989	0.962823	0.0459407	1.80385
GOTERM_BP_FAT	GO:0015718~monocarboxylic acid transport	12	1.01695	0.00128827	SLC1A4, CPT1B, SLC25A20, CPT2, CD36, SLC16A7, PLIN2, PPARG, LHCGR, ANXA1, FABP3, SLC5A6	867	24	4909	2.83103	0.985609	0.0572033	2.31781
Annotation Cluster 16	Enrichment Score: 3.251712730827952
Category	Term	Count	%	PValue	Genes	List Total	Pop Hits	Pop Total	Fold Enrichment	Bonferroni	Benjamini	FDR
GOTERM_MF_FAT	GO:0016836~hydro-lyase activity	13	1.10169	0.000158479	ECH1, ACO2, PCBD1, ACO1, EHHADH, CA5B, UROS, FASN, ECHS1, CA3, CA2, HADHA, HADHB	816	23	4649	3.22022	0.171755	0.0232805	0.255607
SP_PIR_KEYWORDS	lyase	21	1.77966	0.00023182	ALDOA, HACL1, MVD, ACO2, PCBD1, ACO1, EHHADH, CA5B, UROS, ECHDC2, ECHS1, NPR1, CLYBL, HADHA, PCK1, CSAD, MLYCD, FASN, CA3, CA2, OGG1	1082	53	6373	2.33378	0.135095	0.00723053	0.343815
SP_PIR_KEYWORDS	carbon-oxygen lyase	7	0.59322	0.00123947	ACO2, PCBD1, ACO1, UROS, NPR1, CA3, CA2	1082	9	6373	4.58113	0.539937	0.0294198	1.82551
SP_PIR_KEYWORDS	hydro-lyase	6	0.508475	0.00216168	ACO2, PCBD1, ACO1, UROS, CA3, CA2	1082	7	6373	5.04859	0.741969	0.0427581	3.16352
Annotation Cluster 17	Enrichment Score: 3.154136054311699
Category	Term	Count	%	PValue	Genes	List Total	Pop Hits	Pop Total	Fold Enrichment	Bonferroni	Benjamini	FDR
GOTERM_BP_FAT	GO:0006641~triglyceride metabolic process	13	1.10169	1.26296e-05	LPL, APOC1, PNPLA2, PNPLA3, PCK1, DGAT1, DGAT2, APOE, AGPAT9, PCSK9, CAT, GPAM, NR1H3	867	19	4909	3.87404	0.0407004	0.00172983	0.0229731
GOTERM_BP_FAT	GO:0006639~acylglycerol metabolic process	14	1.18644	2.93577e-05	LPL, MOGAT1, APOC1, PNPLA2, PNPLA3, PCK1, DGAT1, DGAT2, APOE, AGPAT9, PCSK9, CAT, GPAM, NR1H3	867	23	4909	3.44647	0.0920703	0.0031109	0.0533934
GOTERM_BP_FAT	GO:0006638~neutral lipid metabolic process	14	1.18644	2.93577e-05	LPL, MOGAT1, APOC1, PNPLA2, PNPLA3, PCK1, DGAT1, DGAT2, APOE, AGPAT9, PCSK9, CAT, GPAM, NR1H3	867	23	4909	3.44647	0.0920703	0.0031109	0.0533934
GOTERM_BP_FAT	GO:0006662~glycerol ether metabolic process	14	1.18644	9.41095e-05	LPL, MOGAT1, APOC1, PNPLA2, PNPLA3, PCK1, DGAT1, DGAT2, APOE, AGPAT9, PCSK9, CAT, GPAM, NR1H3	867	25	4909	3.17075	0.266285	0.00771098	0.171063
GOTERM_BP_FAT	GO:0018904~organic ether metabolic process	14	1.18644	9.41095e-05	LPL, MOGAT1, APOC1, PNPLA2, PNPLA3, PCK1, DGAT1, DGAT2, APOE, AGPAT9, PCSK9, CAT, GPAM, NR1H3	867	25	4909	3.17075	0.266285	0.00771098	0.171063
GOTERM_BP_FAT	GO:0046486~glycerolipid metabolic process	28	2.37288	0.00013209	APOC1, ALG9, SH3GLB1, APOE, AGPAT9, PEMT, PCSK9, PIK3CA, CAT, AGPAT2, NR1H3, CPT1B, GPD1, LPL, MOGAT1, ALDH5A1, PNPLA2, PNPLA3, PIGP, CHPT1, PCK1, DGAT1, DGAT2, SEMA6D, PLA2G2A, FABP3, ALG12, GPAM	867	76	4909	2.08602	0.35248	0.0100562	0.240023
GOTERM_BP_FAT	GO:0019432~triglyceride biosynthetic process	7	0.59322	0.000600968	LPL, DGAT1, DGAT2, AGPAT9, GPAM, PNPLA3, PCK1	867	8	4909	4.9543	0.861624	0.0299691	1.08764
GOTERM_BP_FAT	GO:0046463~acylglycerol biosynthetic process	8	0.677966	0.000886432	LPL, MOGAT1, DGAT1, DGAT2, AGPAT9, GPAM, PNPLA3, PCK1	867	11	4909	4.11786	0.94594	0.0419992	1.60035
GOTERM_BP_FAT	GO:0046460~neutral lipid biosynthetic process	8	0.677966	0.000886432	LPL, MOGAT1, DGAT1, DGAT2, AGPAT9, GPAM, PNPLA3, PCK1	867	11	4909	4.11786	0.94594	0.0419992	1.60035
GOTERM_BP_FAT	GO:0046504~glycerol ether biosynthetic process	8	0.677966	0.00180494	LPL, MOGAT1, DGAT1, DGAT2, AGPAT9, GPAM, PNPLA3, PCK1	867	12	4909	3.7747	0.997377	0.0733692	3.23304
GOTERM_MF_FAT	GO:0008374~O-acyltransferase activity	11	0.932203	0.00219874	CPT1B, MOGAT1, CPT2, DGAT1, DGAT2, AGPAT9, AGPAT4, GPAM, LPCAT3, PNPLA3, AGPAT2	816	22	4649	2.84865	0.926992	0.211739	3.49204
GOTERM_MF_FAT	GO:0016411~acylglycerol O-acyltransferase activity	6	0.508475	0.0440057	MOGAT1, DGAT1, DGAT2, AGPAT4, PNPLA3, AGPAT2	816	12	4649	2.84865	1	0.773805	51.6508
GOTERM_MF_FAT	GO:0004144~diacylglycerol O-acyltransferase activity	3	0.254237	0.0813613	MOGAT1, DGAT1, DGAT2	816	3	4649	5.6973	1	0.883147	74.5987
GOTERM_MF_FAT	GO:0003846~2-acylglycerol O-acyltransferase activity	3	0.254237	0.0813613	MOGAT1, DGAT1, DGAT2	816	3	4649	5.6973	1	0.883147	74.5987
Annotation Cluster 18	Enrichment Score: 3.138314449884895
Category	Term	Count	%	PValue	Genes	List Total	Pop Hits	Pop Total	Fold Enrichment	Bonferroni	Benjamini	FDR
INTERPRO	IPR002198:Short-chain dehydrogenase/reductase SDR	16	1.35593	0.000175527	HSD17B10, HSD17B14, HSD17B12, QDPR, DHRS9, DECR1, DHRS7B, RDH5, PECR, DHRS3, RDH10, HSDL2, FASN, HSD11B2, SPR, HSD17B8	1022	33	5842	2.77151	0.245667	0.131477	0.293647
INTERPRO	IPR016040:NAD(P)-binding domain	31	2.62712	0.000351597	ME1, HSD17B10, ME3, HSD17B14, EHHADH, HSD17B12, PGD, HADHA, MTHFD1, FAR2, PECR, FASN, SPR, HADH, NSDHL, HSD17B8, GPD1, DHRS9, ACLY, DECR1, DHRS7B, RDH5, SCCPDH, DHRS3, RDH10, G6PD, HSDL2, BLVRB, HSD11B2, MECR, MDH1	1022	93	5842	1.90541	0.431505	0.171596	0.587386
INTERPRO	IPR002347:Glucose/ribitol dehydrogenase	14	1.18644	0.000834045	HSD17B10, HSD17B14, HSD17B12, DHRS9, DECR1, DHRS7B, RDH5, PECR, RDH10, DHRS3, HSDL2, HSD11B2, SPR, HSD17B8	1022	30	5842	2.66758	0.738164	0.200157	1.3881
GOTERM_MF_FAT	GO:0033764~steroid dehydrogenase activity, acting on the CH-OH group of donors, NAD or NADP as acceptor	8	0.677966	0.00543455	AKR1C3, HSD17B10, HSD17B14, HSD17B12, HSD11B2, DHRS9, HSD17B8, NSDHL	816	14	4649	3.2556	0.998465	0.316914	8.42366
Annotation Cluster 19	Enrichment Score: 3.1337380039309055
Category	Term	Count	%	PValue	Genes	List Total	Pop Hits	Pop Total	Fold Enrichment	Bonferroni	Benjamini	FDR
GOTERM_BP_FAT	GO:0006575~cellular amino acid derivative metabolic process	29	2.45763	1.99087e-05	ACHE, GCLC, STAT5A, GCLM, BBOX1, GLRX2, CKB, CKMT2, SULT1A1, GPX4, PEMT, DMGDH, IDH1, GHR, CPT1B, ACADM, ALDH5A1, LRTOMT, NPR1, CDO1, CHPT1, SOD2, HAGH, G6PD, FABP3, FPGS, AOC2, MGST1, ALDH9A1	867	73	4909	2.24931	0.0634013	0.00218096	0.0362113
GOTERM_BP_FAT	GO:0006790~sulfur metabolic process	26	2.20339	0.000211436	SEPHS2, GCLC, MAMDC2, STAT5A, SLC19A3, GCLM, HS2ST1, GLRX2, MTHFD1, MSRA, GPX4, MCCC1, PEMT, IDH1, GHR, BHMT2, ALDH5A1, CHST2, IGF1, CDO1, SOD2, HAGH, G6PD, EGFLAM, CHST8, MGST1	867	70	4909	2.10305	0.501273	0.0138176	0.38394
GOTERM_BP_FAT	GO:0006749~glutathione metabolic process	10	0.847458	0.000555395	HAGH, G6PD, GCLC, ALDH5A1, GPX4, IDH1, GCLM, MGST1, SOD2, GLRX2	867	16	4909	3.53878	0.839226	0.0281548	1.00555
GOTERM_BP_FAT	GO:0006518~peptide metabolic process	13	1.10169	0.000719021	GCLC, SEC11C, ALDH5A1, MME, GCLM, SOD2, TAPBP, GLRX2, HAGH, G6PD, GPX4, IDH1, MGST1	867	26	4909	2.83103	0.906185	0.0352198	1.29997
KEGG_PATHWAY	hsa00480:Glutathione metabolism	10	0.847458	0.127569	MGST3, TXNDC12, G6PD, GCLC, OPLAH, GPX4, PGD, IDH1, GCLM, MGST1	427	29	2054	1.65873	1	0.599429	81.4099
Annotation Cluster 20	Enrichment Score: 3.111542718054935
Category	Term	Count	%	PValue	Genes	List Total	Pop Hits	Pop Total	Fold Enrichment	Bonferroni	Benjamini	FDR
UP_SEQ_FEATURE	site:Important for catalytic activity	8	0.677966	0.000294944	SEPHS2, ECH1, CNDP2, EHHADH, ECHDC2, ECHS1, HADH, HADHA	1081	10	6370	4.71415	0.540623	0.105174	0.522178
INTERPRO	IPR018376:Enoyl-CoA hydratase/isomerase, conserved site	8	0.677966	0.000358739	ECH1, EHHADH, ECHDC1, ECHDC2, ECHS1, ECHDC3, HIBCH, HADHA	1022	10	5842	4.57299	0.437991	0.134164	0.599284
INTERPRO	IPR001753:Crotonase, core	8	0.677966	0.000837777	ECH1, EHHADH, ECHDC1, ECHDC2, ECHS1, ECHDC3, HIBCH, HADHA	1022	11	5842	4.15727	0.739729	0.174933	1.39427
GOTERM_MF_FAT	GO:0004300~enoyl-CoA hydratase activity	5	0.423729	0.00403815	ECH1, EHHADH, ECHS1, HADHA, HADHB	816	5	4649	5.6973	0.991861	0.290822	6.32517
Annotation Cluster 21	Enrichment Score: 3.062803825688153
Category	Term	Count	%	PValue	Genes	List Total	Pop Hits	Pop Total	Fold Enrichment	Bonferroni	Benjamini	FDR
SP_PIR_KEYWORDS	mitochondrion outer membrane	18	1.52542	0.000489186	CPT1B, USP30, AIFM2, HK2, CYB5B, FIS1, SNN, ACSL1, SH3GLB1, TOMM5, BCL2, RHOT1, GK, ACSL4, AKAP1, GPAM, MGST1, ACSL5	1082	44	6373	2.40955	0.263838	0.0132293	0.724227
GOTERM_CC_FAT	GO:0031968~organelle outer membrane	24	2.0339	0.000607074	CPT1B, USP30, SLC25A4, AIFM2, HK2, BNIP3, CYB5A, CYB5B, FIS1, ACSL1, SH3GLB1, TOMM5, BCL2, DHCR7, NUCB2, RHOT1, PEBP1, GK, ACSL4, AKAP1, GPAM, MGST1, ACSL5, RETSAT	848	64	4615	2.04083	0.246467	0.0155983	0.862078
GOTERM_CC_FAT	GO:0019867~outer membrane	24	2.0339	0.000994142	CPT1B, USP30, SLC25A4, AIFM2, HK2, BNIP3, CYB5A, CYB5B, FIS1, ACSL1, SH3GLB1, TOMM5, BCL2, DHCR7, NUCB2, RHOT1, PEBP1, GK, ACSL4, AKAP1, GPAM, MGST1, ACSL5, RETSAT	848	66	4615	1.97899	0.370922	0.0229085	1.40812
GOTERM_CC_FAT	GO:0005741~mitochondrial outer membrane	21	1.77966	0.00189942	CPT1B, USP30, SLC25A4, AIFM2, HK2, BNIP3, CYB5A, CYB5B, FIS1, ACSL1, SH3GLB1, TOMM5, BCL2, RHOT1, PEBP1, GK, ACSL4, AKAP1, GPAM, MGST1, ACSL5	848	57	4615	2.00503	0.587686	0.0413115	2.67431
Annotation Cluster 22	Enrichment Score: 2.6913036880818204
Category	Term	Count	%	PValue	Genes	List Total	Pop Hits	Pop Total	Fold Enrichment	Bonferroni	Benjamini	FDR
SP_PIR_KEYWORDS	Fatty acid biosynthesis	15	1.27119	0.000227414	FADS1, SCD, PRKAB1, NDUFAB1, FADS2, ACACB, PECR, ELOVL5, PTGDS, MLYCD, ELOVL3, FASN, ELOVL6, MECR, HSD17B8	1082	31	6373	2.85001	0.132706	0.00746555	0.337292
GOTERM_BP_FAT	GO:0046394~carboxylic acid biosynthetic process	27	2.28814	0.00390656	SEPHS2, ASS1, RNPEPL1, NDUFAB1, UROS, MTHFD1, PECR, ELOVL5, SH3GLB1, ELOVL3, FASN, ALDH4A1, ELOVL6, AGPAT2, LPL, SHMT1, BHMT2, FADS1, SCD, PRKAB1, FADS2, ACACB, CDO1, PTGDS, MLYCD, THNSL1, MECR	867	88	4909	1.73722	0.999997	0.136135	6.87304
GOTERM_BP_FAT	GO:0016053~organic acid biosynthetic process	27	2.28814	0.00390656	SEPHS2, ASS1, RNPEPL1, NDUFAB1, UROS, MTHFD1, PECR, ELOVL5, SH3GLB1, ELOVL3, FASN, ALDH4A1, ELOVL6, AGPAT2, LPL, SHMT1, BHMT2, FADS1, SCD, PRKAB1, FADS2, ACACB, CDO1, PTGDS, MLYCD, THNSL1, MECR	867	88	4909	1.73722	0.999997	0.136135	6.87304
GOTERM_BP_FAT	GO:0006633~fatty acid biosynthetic process	16	1.35593	0.00494741	LPL, FADS1, SCD, RNPEPL1, PRKAB1, NDUFAB1, FADS2, ACACB, PECR, ELOVL5, PTGDS, MLYCD, ELOVL3, FASN, ELOVL6, MECR	867	43	4909	2.10681	1	0.159358	8.62748
Annotation Cluster 23	Enrichment Score: 2.6677853841058594
Category	Term	Count	%	PValue	Genes	List Total	Pop Hits	Pop Total	Fold Enrichment	Bonferroni	Benjamini	FDR
SP_PIR_KEYWORDS	mitochondrion inner membrane	38	3.22034	2.17197e-05	UQCRC2, CPT2, ATP5B, CYC1, COX7C, UQCRFS1, NDUFAF3, SLC25A20, SLC25A25, MTCH2, CKMT2, SLC25A22, DHODH, ETFDH, SLC25A44, SLC25A1, NDUFS2, NDUFS1, ATP5J, CRLS1, NDUFA3, ABCB8, SLC25A4, PHB, NDUFC2, UCP1, NDUFV3, ACADVL, SLC25A11, LETM1, SLC25A33, UQCRH, UCP2, SLC25A10, PHB2, SLC25A35, COQ10A, SLC25A18	1082	112	6373	1.9984	0.0135047	0.000970722	0.0322598
UP_SEQ_FEATURE	repeat:Solcar 1	14	1.18644	0.00061928	SLC25A4, UCP1, SLC25A20, SLC25A11, SLC25A25, MTCH2, UCP2, SLC25A33, SLC25A10, SLC25A35, SLC25A22, SLC25A1, SLC25A44, SLC25A18	1081	30	6370	2.74992	0.804764	0.138004	1.09342
UP_SEQ_FEATURE	repeat:Solcar 2	14	1.18644	0.00061928	SLC25A4, UCP1, SLC25A20, SLC25A11, SLC25A25, MTCH2, UCP2, SLC25A33, SLC25A10, SLC25A35, SLC25A22, SLC25A1, SLC25A44, SLC25A18	1081	30	6370	2.74992	0.804764	0.138004	1.09342
INTERPRO	IPR018108:Mitochondrial substrate/solute carrier	14	1.18644	0.000834045	SLC25A4, UCP1, SLC25A20, SLC25A11, SLC25A25, MTCH2, UCP2, SLC25A33, SLC25A10, SLC25A35, SLC25A22, SLC25A1, SLC25A44, SLC25A18	1022	30	5842	2.66758	0.738164	0.200157	1.3881
INTERPRO	IPR001993:Mitochondrial substrate carrier	13	1.10169	0.00100476	SLC25A4, UCP1, SLC25A20, SLC25A11, SLC25A25, UCP2, SLC25A33, SLC25A10, SLC25A35, SLC25A22, SLC25A1, SLC25A44, SLC25A18	1022	27	5842	2.75226	0.801002	0.182748	1.66998
UP_SEQ_FEATURE	repeat:Solcar 3	13	1.10169	0.00112718	SLC25A4, UCP1, SLC25A20, SLC25A11, SLC25A25, UCP2, SLC25A33, SLC25A10, SLC25A35, SLC25A22, SLC25A1, SLC25A44, SLC25A18	1081	28	6370	2.73589	0.948904	0.204491	1.98175
PIR_SUPERFAMILY	PIRSF002458:ADP,ATP carrier protein	9	0.762712	0.00890852	SLC25A11, SLC25A20, SLC25A4, SLC25A33, UCP2, SLC25A22, SLC25A35, UCP1, SLC25A18	521	17	2678	2.72124	0.992311	0.912313	12.2246
INTERPRO	IPR002113:Adenine nucleotide translocator 1	6	0.508475	0.105387	SLC25A11, SLC25A20, SLC25A4, SLC25A22, SLC25A1, SLC25A44	1022	15	5842	2.2865	1	0.998672	84.5202
INTERPRO	IPR002067:Mitochondrial carrier protein	6	0.508475	0.132271	SLC25A4, SLC25A25, SLC25A22, SLC25A1, SLC25A44, SLC25A18	1022	16	5842	2.14359	1	0.999357	90.7151
Annotation Cluster 24	Enrichment Score: 2.6076454439010694
Category	Term	Count	%	PValue	Genes	List Total	Pop Hits	Pop Total	Fold Enrichment	Bonferroni	Benjamini	FDR
INTERPRO	IPR012674:Calycin	8	0.677966	0.000126796	RBP4, PTGDS, RBP1, APOD, FABP3, FABP4, FABP7, FABP5	1022	9	5842	5.0811	0.18425	0.18425	0.212204
INTERPRO	IPR000566:Lipocalin-related protein and Bos/Can/Equ allergen	8	0.677966	0.000126796	RBP4, PTGDS, RBP1, APOD, FABP3, FABP4, FABP7, FABP5	1022	9	5842	5.0811	0.18425	0.18425	0.212204
SP_PIR_KEYWORDS	lipid binding	7	0.59322	0.00123947	RBP1, APOD, APOE, CLU, FABP3, FABP4, VCL	1082	9	6373	4.58113	0.539937	0.0294198	1.82551
PIR_SUPERFAMILY	PIRSF002390:lipid binding protein, FABP type	5	0.423729	0.00595484	RBP1, FABP3, FABP4, FABP7, FABP5	521	5	2678	5.14012	0.961191	0.961191	8.33485
PIR_SUPERFAMILY	PIRSF500199:intracellular lipid-binding protein	5	0.423729	0.00595484	RBP1, FABP3, FABP4, FABP7, FABP5	521	5	2678	5.14012	0.961191	0.961191	8.33485
INTERPRO	IPR000463:Cytosolic fatty-acid binding	5	0.423729	0.0103263	RBP1, FABP3, FABP4, FABP7, FABP5	1022	6	5842	4.76354	1	0.811192	15.9612
UP_SEQ_FEATURE	region of interest:Fatty acid binding	3	0.254237	0.0764451	FABP4, FABP7, FABP5	1081	3	6370	5.89269	1	0.999079	75.6202
Annotation Cluster 25	Enrichment Score: 2.571051363986975
Category	Term	Count	%	PValue	Genes	List Total	Pop Hits	Pop Total	Fold Enrichment	Bonferroni	Benjamini	FDR
SP_PIR_KEYWORDS	glycoprotein	244	20.678	8.60986e-05	CADM3, BTD, GLDN, EFNA1, LHCGR, CD52, AQP1, ADORA1, AQP3, HS2ST1, TMEM140, ERO1LB, APOD, APOE, AQP11, ERAP1, APOO, MATN2, F11R, TYRO3, PTPRF, CRYAB, SERPING1, TMEM132C, NPC1, ADAMTS9, MGAT3, NPC2, EGFLAM, CD36, HEPACAM, SERPINF1, GPBAR1, TMEM170B, PMP22, GPR146, CLCN3, CRELD1, IGFBPL1, PTH1R, MME, HFE, FCGRT, CALR, NRN1, POMC, SYPL2, MANF, EPHB2, SLC29A1, TMEM129, LGALS3BP, SLC29A2, SLC29A4, BAI2…	1082	1168	6373	1.23045	0.0524732	0.00316557	0.127823
UP_SEQ_FEATURE	glycosylation site:N-linked (GlcNAc...)	225	19.0678	0.000549318	CADM3, GLDN, BTD, EFNA1, LHCGR, CD52, AQP1, ADORA1, AQP3, HS2ST1, TMEM140, ERO1LB, APOD, AQP11, ERAP1, MATN2, F11R, TYRO3, PTPRF, SERPING1, TMEM132C, NPC1, ADAMTS9, MGAT3, NPC2, EGFLAM, CD36, HEPACAM, SERPINF1, GPBAR1, TMEM170B, PMP22, GPR146, CLCN3, CRELD1, IGFBPL1, PTH1R, MME, HFE, FCGRT, CALR, POMC, SYPL2, EPHB2, SLC29A1, TMEM129, LGALS3BP, SLC29A2, SLC29A4, BAI2, OLFM2, LFNG, PLTP, ACER3, PCN…	1081	1097	6370	1.20862	0.765183	0.148703	0.970461
UP_SEQ_FEATURE	disulfide bond	139	11.7797	0.00265301	CADM3, PLXNA4, EFNA1, LHCGR, TNFSF13, TLR4, ADORA1, TAPBP, NRCAM, MARCO, ERO1LB, APOD, CFD, MATN2, F11R, TYRO3, PTPRF, SPARCL1, HLA-A, SERPING1, TCN2, ADAMTS9, CD36, EGFLAM, LYNX1, NPC2, GPBAR1, HEPACAM, PLA2G2A, RBP4, ABCA7, EXTL3, ACHE, IGFBPL1, CRELD1, CLU, PTH1R, MME, HFE, LRIG1, CNTFR, TIMP4, FCGRT, ABCA1, CALR, POMC, MANF, LGALS3BP, BAI2, OLFM2, DEFB1, PLTP, ANGPTL4, LPL, CHI3L2, MCAM, TXND…	1081	658	6370	1.24481	0.999093	0.393698	4.60541
SP_PIR_KEYWORDS	disulfide bond	145	12.2881	0.00285945	CADM3, PLXNA4, EFNA1, LHCGR, TNFSF13, TLR4, ADORA1, TAPBP, NRCAM, MARCO, ERO1LB, APOD, CFD, MATN2, F11R, TYRO3, PTPRF, SPARCL1, HLA-A, SERPING1, TCN2, PODXL2, ADAMTS9, EGFLAM, CD36, LYNX1, NPC2, GPBAR1, HEPACAM, PLA2G2A, MPST, ABCA7, RBP4, EXTL3, ACHE, IGFBPL1, CRELD1, CLU, PTH1R, MME, HFE, LRIG1, CNTFR, TIMP4, FCGRT, ABCA1, CALR, POMC, MANF, LGALS3BP, BAI2, OLFM2, DEFB1, PLTP, ANGPTL4, LPL, CHI3…	1082	691	6373	1.23597	0.83347	0.0528716	4.16459
SP_PIR_KEYWORDS	signal	174	14.7458	0.0320553	CADM3, PLXNA4, BTD, EFNA1, C6ORF57, LHCGR, TLR4, BPHL, CD52, TAPBP, NRCAM, ERO1LB, APOD, GCOM1, APOE, CFD, APOO, MATN2, F11R, TYRO3, RET, C2CD2, LRRN4CL, PTPRF, SPARCL1, HLA-A, SERPING1, LHFP, METTL7A, TCN2, METTL7B, TMEM132C, NPC1, PODXL2, ADAMTS9, NPC2, EGFLAM, LYNX1, SERPINF1, HEPACAM, PLA2G2A, FAM171A2, RBP4, ACHE, MAMDC2, IGFBPL1, CRELD1, CLU, PTH1R, APOC1, HFE, LRIG1, CNTFR, TIMP4, FCGRT, N…	1082	902	6373	1.13621	1	0.340472	38.3674
UP_SEQ_FEATURE	signal peptide	174	14.7458	0.03258	CADM3, PLXNA4, BTD, EFNA1, C6ORF57, LHCGR, TLR4, BPHL, CD52, TAPBP, NRCAM, ERO1LB, APOD, GCOM1, APOE, CFD, APOO, MATN2, F11R, TYRO3, RET, C2CD2, LRRN4CL, PTPRF, SPARCL1, HLA-A, SERPING1, LHFP, METTL7A, TCN2, METTL7B, TMEM132C, NPC1, PODXL2, ADAMTS9, NPC2, EGFLAM, LYNX1, SERPINF1, HEPACAM, PLA2G2A, FAM171A2, RBP4, ACHE, MAMDC2, IGFBPL1, CRELD1, CLU, PTH1R, APOC1, HFE, LRIG1, CNTFR, TIMP4, FCGRT, N…	1081	902	6370	1.13673	1	0.977575	44.4486
Annotation Cluster 26	Enrichment Score: 2.5256721131033224
Category	Term	Count	%	PValue	Genes	List Total	Pop Hits	Pop Total	Fold Enrichment	Bonferroni	Benjamini	FDR
OMIM_DISEASE	Common variants at 30 loci contribute to polygenic dyslipidemia	14	1.18644	5.66024e-05	LPL, HMGCR, FADS1, MLXIPL, APOC1, FADS2, ABCA1, MMAB, APOE, PCSK9, SORT1, MVK, PLTP, ANGPTL4	249	21	1161	3.10843	0.0253157	0.0253157	0.0803479
OMIM_DISEASE	Newly identified loci that influence lipid concentrations and risk of coronary artery disease	9	0.762712	0.00184238	LPL, APOE, MLXIPL, APOC1, PCSK9, SORT1, MVK, ABCA1, MMAB	249	13	1161	3.22799	0.566284	0.341429	2.58468
OMIM_DISEASE	Six new loci associated with blood low-density lipoprotein cholesterol, high-density lipoprotein cholesterol or triglycerides in humans	9	0.762712	0.00615427	LPL, ACAA2, HMGCR, APOE, MLXIPL, APOC1, PCSK9, SORT1, ABCA1	249	15	1161	2.79759	0.938977	0.6063	8.39307
OMIM_DISEASE	Loci influencing lipid levels and coronary heart disease risk in 16 European population cohorts	6	0.508475	0.123005	LPL, HMGCR, APOE, MLXIPL, FADS2, ABCA1	249	13	1161	2.15199	1	0.999795	84.4927
Annotation Cluster 27	Enrichment Score: 2.4863650462288387
Category	Term	Count	%	PValue	Genes	List Total	Pop Hits	Pop Total	Fold Enrichment	Bonferroni	Benjamini	FDR
GOTERM_BP_FAT	GO:0032868~response to insulin stimulus	23	1.94915	5.26032e-05	RBP4, GRB2, FADS1, PPARG, PFKFB1, RHOQ, PDE3B, LPIN1, PCK1, ACVR1C, SLC2A8, AKT1, EIF4EBP2, SORBS1, CCND2, FABP3, SORT1, PCSK9, HSD11B2, SIK2, AKT2, VLDLR, GHR	867	54	4909	2.41162	0.15892	0.00493263	0.0956512
GOTERM_BP_FAT	GO:0043434~response to peptide hormone stimulus	28	2.37288	0.00013209	RBP4, CAV2, GRB2, STAT5A, PPARG, PFKFB1, RHOQ, PDE3B, TIMP4, ACVR1C, SLC2A8, AKT1, EIF4EBP2, SORBS1, BCL2, PCSK9, SIK2, GHR, AKT2, FADS1, CDO1, LPIN1, PCK1, CCND2, FABP3, SORT1, HSD11B2, VLDLR	867	76	4909	2.08602	0.35248	0.0100562	0.240023
GOTERM_BP_FAT	GO:0009719~response to endogenous stimulus	55	4.66102	0.000221842	STAT5A, PPARG, LHCGR, RHOQ, PDE3B, UQCRFS1, AQP1, CITED1, ACVR1C, AKT1, SLC2A8, PRKAR2B, PRKAR2A, EIF4EBP2, GPX4, IL1B, PRKACA, SIK2, AKT2, GHR, ACADS, CRYAB, ADIPOR2, CDO1, LPIN1, DDIT3, PPARGC1B, CCND2, PEBP1, HSD11B2, SORT1, CA2, ALPL, ME1, RBP4, CAV2, GCLC, GRB2, PFKFB1, HMGCS1, UROS, TIMP4, SORBS1, BCL2, PEMT, PCSK9, IDH1, FADS1, ADIPOQ, ABCG1, PCK1, FABP3, FABP4, MGST1, VLDLR	867	194	4909	1.60522	0.518063	0.0142107	0.402801
GOTERM_BP_FAT	GO:0009725~response to hormone stimulus	50	4.23729	0.000428451	ALPL, ME1, CAV2, RBP4, GCLC, GRB2, STAT5A, LHCGR, PFKFB1, PPARG, PDE3B, RHOQ, TIMP4, UQCRFS1, AQP1, CITED1, ACVR1C, AKT1, SLC2A8, PRKAR2B, PRKAR2A, EIF4EBP2, SORBS1, GPX4, BCL2, PCSK9, IDH1, IL1B, PRKACA, SIK2, AKT2, GHR, ACADS, CRYAB, FADS1, ADIPOR2, CDO1, LPIN1, ADIPOQ, PPARGC1B, ABCG1, PCK1, CCND2, FABP3, PEBP1, FABP4, HSD11B2, SORT1, CA2, VLDLR	867	176	4909	1.60854	0.755834	0.0244318	0.776564
GOTERM_BP_FAT	GO:0032869~cellular response to insulin stimulus	15	1.27119	0.00488313	GRB2, PPARG, RHOQ, PDE3B, LPIN1, SLC2A8, AKT1, EIF4EBP2, SORBS1, CCND2, PCSK9, SIK2, AKT2, VLDLR, GHR	867	39	4909	2.17771	1	0.159006	8.52005
GOTERM_BP_FAT	GO:0010033~response to organic substance	81	6.86441	0.00547461	STAT5A, LHCGR, PPARG, PDE3B, RHOQ, PRDX2, TLR4, UQCRFS1, AQP1, ASAH1, CITED1, ACVR1C, SLC2A8, AKT1, PRKAR2B, PRKAR2A, EIF4EBP2, AES, APOE, GPX4, IL1B, PRKACA, SIK2, AKT2, GHR, HSP90AA1, CRYAB, ACADS, ADIPOR2, CDO1, LPIN1, PPARGC1B, DDIT3, CD83, CCND2, SORT1, HSD11B2, PEBP1, CA2, ME1, ALPL, CAV2, TF, RBP4, GCLC, DERL1, GRB2, PFKFB2, PFKFB1, NNAT, HMGCS1, UROS, TIMP4, HSPA1B, ATP5G3, MANF, GLRX2, A…	867	349	4909	1.31412	1	0.173136	9.50416
GOTERM_BP_FAT	GO:0032870~cellular response to hormone stimulus	21	1.77966	0.0212524	GRB2, STAT5A, PPARG, LHCGR, ADIPOR2, RHOQ, PDE3B, LPIN1, SLC2A8, AKT1, PRKAR2B, PRKAR2A, EIF4EBP2, SORBS1, CCND2, PCSK9, PRKACA, SIK2, AKT2, VLDLR, GHR	867	72	4909	1.65143	1	0.429307	32.3474
GOTERM_BP_FAT	GO:0008286~insulin receptor signaling pathway	8	0.677966	0.136903	SLC2A8, AKT1, EIF4EBP2, SORBS1, GRB2, RHOQ, SIK2, AKT2	867	25	4909	1.81186	1	0.899304	93.1323
GOTERM_BP_FAT	GO:0007169~transmembrane receptor protein tyrosine kinase signaling pathway	17	1.44068	0.81661	RET, GRB2, EFNA1, STAT5A, RHOQ, EPHB2, SLC2A8, AKT1, ADRB2, EIF4EBP2, SORBS1, MAPK8IP2, SORT1, FGF1, SIK2, AKT2, GHR	867	108	4909	0.891249	1	0.999992	100
Annotation Cluster 28	Enrichment Score: 2.4817378060223736
Category	Term	Count	%	PValue	Genes	List Total	Pop Hits	Pop Total	Fold Enrichment	Bonferroni	Benjamini	FDR
GOTERM_CC_FAT	GO:0005887~integral to plasma membrane	82	6.94915	0.00196855	TM7SF2, GYPC, EFNA1, TOLLIP, LHCGR, AQP7, TNFSF13, TMEM11, CD52, TLR4, SYNGR1, KCNIP2, AQP1, SYNGR2, ADORA1, ACVR1C, SLC2A8, MARCO, NRCAM, SLC1A4, LNPEP, SLC1A5, SLC2A4, SLC22A3, MCOLN1, GHR, FLVCR1, RAMP2, TYRO3, PTGER3, SLC25A4, PTPRF, HLA-A, SLC7A10, KTN1, MMP15, BCAP31, CD83, NPC1, ADRB2, PODXL2, CD36, PEBP1, TSHR, CAV2, PALM, PTH1R, MMD, HFE, MME, ABCA1, SLC19A1, EPHB2, SLC29A1, SLC29A2, SOR…	848	329	4615	1.35642	0.600782	0.0408795	2.77038
GOTERM_CC_FAT	GO:0031226~intrinsic to plasma membrane	83	7.0339	0.0034288	TM7SF2, GYPC, EFNA1, TOLLIP, LHCGR, AQP7, TNFSF13, TMEM11, CD52, TLR4, SYNGR1, KCNIP2, AQP1, SYNGR2, ADORA1, ACVR1C, SLC2A8, MARCO, NRCAM, SLC1A4, LNPEP, SLC1A5, SLC2A4, SLC22A3, MCOLN1, GHR, FLVCR1, RAMP2, TYRO3, PTGER3, SLC25A4, PTPRF, HLA-A, SLC7A10, KTN1, MMP15, BCAP31, CD83, NPC1, ADRB2, PODXL2, CD36, PEBP1, TSHR, CAV2, PALM, RTN4RL1, PTH1R, MMD, HFE, MME, ABCA1, SLC19A1, EPHB2, SLC29A1, SLC…	848	340	4615	1.32854	0.798218	0.0645151	4.77913
GOTERM_CC_FAT	GO:0044459~plasma membrane part	161	13.6441	0.00531493	DLC1, CADM3, EFNA1, UTRN, LHCGR, AQP7, TNFSF13, TLR4, TMEM11, CD52, AQP1, ADORA1, AQP3, CALB2, VCL, PNN, SLC2A8, MARCO, NRCAM, SHB, SLC2A4, APOE, SLC4A2, MCOLN1, C6ORF136, FLVCR1, SCAMP5, F11R, TYRO3, PTPRF, HLA-A, BCAP31, NPC1, PODXL2, EGFLAM, CD36, HEPACAM, ARRB1, PMP22, AKAP2, CAV2, ABCA7, PALM, CLCN3, ACHE, LITAF, MRAS, PTH1R, MMD, MME, HFE, FCGRT, ABCA1, CALR, EPHB2, SLC29A1, SLC29A2, PEMT, …	848	733	4615	1.19536	0.916538	0.0945603	7.31664
Annotation Cluster 29	Enrichment Score: 2.445317896855354
Category	Term	Count	%	PValue	Genes	List Total	Pop Hits	Pop Total	Fold Enrichment	Bonferroni	Benjamini	FDR
GOTERM_BP_FAT	GO:0048878~chemical homeostasis	57	4.83051	4.18742e-06	WFS1, ATP5B, PPARG, PDE3B, BNIP3, CD52, ADORA1, CKB, MBP, SLC2A4, APOE, AQP11, SLC24A2, IL1B, LTF, SV2A, NDUFS1, PTGER3, ACO1, MLXIPL, PPARGC1A, NPC1, NPC2, GIPR, PRNP, PMP22, RBP4, TF, CLCN3, GCLC, DERL1, PTH1R, HFE, ABCA1, CALR, GCLM, SYPL2, BCL2, AGT, TGM2, PCSK9, SCARB1, LPL, MPZ, SLC12A5, NPR1, IGF1, ATP1A2, ADIPOQ, ABCG1, PCK1, SOD2, HSP90B1, PYGM, PYGL, FABP4, IFI6	867	179	4909	1.803	0.0136822	0.000688596	0.00761739
GOTERM_BP_FAT	GO:0042592~homeostatic process	77	6.52542	8.63682e-05	WFS1, STAT5A, ATP5B, PPARG, PDE3B, BNIP3, PRDX5, PRDX2, CD52, PDIA4, ADORA1, MBP, CKB, AKT1, SLC2A4, APOE, AQP11, SLC24A2, IL1B, LTF, SLC22A5, SV2A, NDUFS1, FLVCR1, PTGER3, ACO1, AIFM1, MLXIPL, PPARGC1A, DDIT3, NPC1, ADRB2, G6PD, NPC2, PRDX6, GIPR, PRNP, PMP22, ALDOA, TF, RBP4, CLCN3, GCLC, DERL1, PTH1R, HFE, ABCA1, CALR, SYPL2, GCLM, GLRX2, AGT, BCL2, TGM2, PCSK9, SCARB1, LPL, MPZ, CEBPG, SLC12A…	867	288	4909	1.51381	0.247356	0.0074501	0.157002
GOTERM_BP_FAT	GO:0019725~cellular homeostasis	50	4.23729	0.000275437	ALDOA, TF, CLCN3, GCLC, WFS1, ATP5B, PTH1R, BNIP3, PRDX5, HFE, PRDX2, CD52, PDIA4, CALR, SYPL2, GCLM, ADORA1, MBP, GLRX2, CKB, AQP11, APOE, SLC24A2, AGT, BCL2, TGM2, LTF, IL1B, SV2A, NDUFS1, PTGER3, MPZ, ACO1, AIFM1, SLC12A5, ATP1A2, PPARGC1A, ADIPOQ, DDIT3, SOD2, TXNDC12, TXNDC11, HSP90B1, PYGM, PRDX6, GIPR, RHOT1, PRNP, PMP22, IFI6	867	173	4909	1.63643	0.595989	0.0166435	0.499884
GOTERM_BP_FAT	GO:0055082~cellular chemical homeostasis	39	3.30508	0.000287426	TF, CLCN3, GCLC, WFS1, ATP5B, PTH1R, HFE, BNIP3, CD52, CALR, ADORA1, GCLM, SYPL2, CKB, MBP, APOE, AQP11, SLC24A2, AGT, BCL2, TGM2, IL1B, LTF, SV2A, NDUFS1, PTGER3, MPZ, ACO1, SLC12A5, ATP1A2, ADIPOQ, PPARGC1A, SOD2, HSP90B1, PYGM, GIPR, PRNP, PMP22, IFI6	867	125	4909	1.76656	0.611619	0.0170488	0.521589
GOTERM_BP_FAT	GO:0006873~cellular ion homeostasis	38	3.22034	0.00051535	TF, CLCN3, GCLC, WFS1, ATP5B, PTH1R, HFE, BNIP3, CD52, CALR, ADORA1, GCLM, SYPL2, CKB, MBP, APOE, AQP11, SLC24A2, AGT, BCL2, TGM2, IL1B, LTF, SV2A, NDUFS1, PTGER3, MPZ, ACO1, SLC12A5, ATP1A2, ADIPOQ, SOD2, HSP90B1, PYGM, GIPR, PRNP, PMP22, IFI6	867	124	4909	1.73515	0.816573	0.0269831	0.93337
GOTERM_BP_FAT	GO:0050801~ion homeostasis	39	3.30508	0.00109323	TF, CLCN3, GCLC, WFS1, ATP5B, PTH1R, HFE, BNIP3, CD52, CALR, ADORA1, GCLM, SYPL2, CKB, MBP, APOE, AQP11, SLC24A2, BCL2, AGT, TGM2, IL1B, LTF, SV2A, NDUFS1, PTGER3, MPZ, ACO1, SLC12A5, NPR1, ATP1A2, ADIPOQ, SOD2, HSP90B1, PYGM, GIPR, PRNP, PMP22, IFI6	867	133	4909	1.6603	0.97264	0.0494226	1.97019
GOTERM_BP_FAT	GO:0030003~cellular cation homeostasis	26	2.20339	0.0107987	TF, CLCN3, PTGER3, WFS1, ACO1, ATP5B, PTH1R, SLC12A5, HFE, CD52, ATP1A2, CALR, SYPL2, HSP90B1, PYGM, AQP11, APOE, SLC24A2, BCL2, AGT, GIPR, TGM2, IL1B, LTF, SV2A, PRNP	867	90	4909	1.6357	1	0.279432	17.9233
GOTERM_BP_FAT	GO:0055080~cation homeostasis	27	2.28814	0.0222811	TF, CLCN3, PTGER3, WFS1, ACO1, ATP5B, PTH1R, SLC12A5, HFE, CD52, ATP1A2, CALR, SYPL2, SOD2, HSP90B1, PYGM, AQP11, APOE, SLC24A2, BCL2, AGT, GIPR, TGM2, IL1B, LTF, SV2A, PRNP	867	100	4909	1.52875	1	0.429716	33.6294
GOTERM_BP_FAT	GO:0006875~cellular metal ion homeostasis	17	1.44068	0.0392594	PTGER3, WFS1, PTH1R, CD52, ATP1A2, CALR, SYPL2, HSP90B1, PYGM, APOE, SLC24A2, AGT, BCL2, GIPR, TGM2, IL1B, SV2A	867	58	4909	1.65957	1	0.587015	51.7414
GOTERM_BP_FAT	GO:0030005~cellular di-, tri-valent inorganic cation homeostasis	21	1.77966	0.0475131	TF, PTGER3, WFS1, ACO1, PTH1R, HFE, CD52, ATP1A2, CALR, SYPL2, HSP90B1, PYGM, APOE, SLC24A2, BCL2, GIPR, TGM2, LTF, IL1B, SV2A, PRNP	867	78	4909	1.5244	1	0.639437	58.7515
GOTERM_BP_FAT	GO:0006874~cellular calcium ion homeostasis	16	1.35593	0.0493817	PTGER3, WFS1, PTH1R, CD52, ATP1A2, CALR, SYPL2, HSP90B1, PYGM, APOE, SLC24A2, BCL2, GIPR, TGM2, IL1B, SV2A	867	55	4909	1.64714	1	0.644728	60.1991
GOTERM_BP_FAT	GO:0055065~metal ion homeostasis	17	1.44068	0.0521721	PTGER3, WFS1, PTH1R, CD52, ATP1A2, CALR, SYPL2, HSP90B1, PYGM, APOE, SLC24A2, AGT, BCL2, GIPR, TGM2, IL1B, SV2A	867	60	4909	1.60425	1	0.663172	62.2716
GOTERM_BP_FAT	GO:0055066~di-, tri-valent inorganic cation homeostasis	22	1.86441	0.0549139	TF, PTGER3, WFS1, ACO1, PTH1R, HFE, CD52, ATP1A2, CALR, SYPL2, SOD2, HSP90B1, PYGM, APOE, SLC24A2, BCL2, GIPR, TGM2, LTF, IL1B, SV2A, PRNP	867	84	4909	1.48292	1	0.673517	64.2084
GOTERM_BP_FAT	GO:0055074~calcium ion homeostasis	16	1.35593	0.0569028	PTGER3, WFS1, PTH1R, CD52, ATP1A2, CALR, SYPL2, HSP90B1, PYGM, APOE, SLC24A2, BCL2, GIPR, TGM2, IL1B, SV2A	867	56	4909	1.61773	1	0.68251	65.5542
Annotation Cluster 30	Enrichment Score: 2.41586457047895
Category	Term	Count	%	PValue	Genes	List Total	Pop Hits	Pop Total	Fold Enrichment	Bonferroni	Benjamini	FDR
GOTERM_BP_FAT	GO:0007267~cell-cell signaling	42	3.55932	0.000243526	SEPT5, CAV2, NAMPT, YWHAZ, ACHE, EFNA1, GRB2, TOLLIP, MME, NMB, KCNIP2, POMC, ADORA1, MBP, SLC1A4, LNPEP, SPRY1, APOE, AGT, SYN2, SLC22A3, IL1B, FGF1, GCHFR, TRHDE, MPZ, PTPRF, SLC25A4, ALDH5A1, FADS1, SLC12A5, LRTOMT, SMAD2, ATP1A2, KCNK3, DGAT1, CXCL14, PEBP1, GDF15, PMP22, TSHR, ALDH9A1	867	137	4909	1.73581	0.551254	0.0150051	0.442091
GOTERM_BP_FAT	GO:0007268~synaptic transmission	22	1.86441	0.0022982	SEPT5, CAV2, ACHE, MPZ, SLC25A4, PTPRF, ALDH5A1, SLC12A5, LRTOMT, ATP1A2, KCNIP2, ADORA1, KCNK3, MBP, SLC1A4, APOE, SYN2, SLC22A3, PEBP1, PMP22, GCHFR, ALDH9A1	867	64	4909	1.94633	0.999484	0.0892203	4.09926
GOTERM_BP_FAT	GO:0050877~neurological system process	50	4.23729	0.0114128	SEPT5, CAV2, RBP4, ACHE, HMGCR, WFS1, KCNIP2, ADORA1, MBP, EPHB2, SLC1A4, PRKAR2B, BEST1, PDE1B, RAC3, APOE, SLC24A2, AGT, SYN2, NR2F6, IL1B, SLC22A3, ACSL4, IMPDH1, GCHFR, FZD9, MPZ, ZNF354A, SLC25A4, PTPRF, ALDH5A1, SLC12A5, LRTOMT, ATP1A2, KCNK3, SOD2, RDH5, DHRS3, RDH10, AAAS, S100B, ARRB1, HOXB8, PEBP1, PMP22, FABP7, AOC2, ACAD11, ALDH9A1, VLDLR	867	204	4909	1.38776	1	0.286218	18.8452
GOTERM_BP_FAT	GO:0019226~transmission of nerve impulse	22	1.86441	0.0339795	SEPT5, CAV2, ACHE, MPZ, SLC25A4, PTPRF, ALDH5A1, SLC12A5, LRTOMT, ATP1A2, KCNIP2, ADORA1, KCNK3, MBP, SLC1A4, APOE, SYN2, SLC22A3, PEBP1, PMP22, GCHFR, ALDH9A1	867	80	4909	1.55706	1	0.553644	46.6818
Annotation Cluster 31	Enrichment Score: 2.3325552615174883
Category	Term	Count	%	PValue	Genes	List Total	Pop Hits	Pop Total	Fold Enrichment	Bonferroni	Benjamini	FDR
GOTERM_BP_FAT	GO:0046486~glycerolipid metabolic process	28	2.37288	0.00013209	APOC1, ALG9, SH3GLB1, APOE, AGPAT9, PEMT, PCSK9, PIK3CA, CAT, AGPAT2, NR1H3, CPT1B, GPD1, LPL, MOGAT1, ALDH5A1, PNPLA2, PNPLA3, PIGP, CHPT1, PCK1, DGAT1, DGAT2, SEMA6D, PLA2G2A, FABP3, ALG12, GPAM	867	76	4909	2.08602	0.35248	0.0100562	0.240023
GOTERM_BP_FAT	GO:0019637~organophosphate metabolic process	32	2.71186	0.000480539	TALDO1, ALG9, FDFT1, CEPT1, SH3GLB1, PLA2G12A, GPX4, AGPAT9, PEMT, PCSK9, PIK3CA, PLCD1, PCYT2, AGPAT4, AGPAT2, CPT1B, GPD1, LPL, CRLS1, LPGAT1, ALDH5A1, FADS1, LPCAT3, PIGP, CHPT1, SEMA6D, PRDX6, PLA2G2A, FABP3, GK, ALG12, GPAM	867	98	4909	1.84883	0.794303	0.0268964	0.870582
GOTERM_BP_FAT	GO:0045017~glycerolipid biosynthetic process	18	1.52542	0.00138464	CPT1B, LPL, MOGAT1, PNPLA3, PIGP, ALG9, CHPT1, PCK1, DGAT1, SEMA6D, DGAT2, SH3GLB1, AGPAT9, FABP3, PEMT, ALG12, GPAM, AGPAT2	867	46	4909	2.21559	0.989524	0.0597441	2.48915
GOTERM_BP_FAT	GO:0006644~phospholipid metabolic process	29	2.45763	0.00143437	ALG9, FDFT1, CEPT1, SH3GLB1, PLA2G12A, GPX4, AGPAT9, PEMT, PCSK9, PIK3CA, PLCD1, PCYT2, AGPAT4, AGPAT2, CPT1B, LPL, CRLS1, LPGAT1, ALDH5A1, FADS1, LPCAT3, PIGP, CHPT1, SEMA6D, PRDX6, PLA2G2A, FABP3, ALG12, GPAM	867	91	4909	1.80439	0.991107	0.0610249	2.57745
GOTERM_BP_FAT	GO:0008654~phospholipid biosynthetic process	19	1.61017	0.0106306	CPT1B, CRLS1, LPGAT1, FADS1, LPCAT3, PIGP, ALG9, CHPT1, CEPT1, SEMA6D, SH3GLB1, AGPAT9, FABP3, PEMT, PCYT2, AGPAT4, ALG12, GPAM, AGPAT2	867	59	4909	1.82337	1	0.280081	17.6692
GOTERM_BP_FAT	GO:0046474~glycerophospholipid biosynthetic process	10	0.847458	0.150233	CPT1B, SEMA6D, SH3GLB1, PEMT, FABP3, ALG12, ALG9, PIGP, CHPT1, AGPAT2	867	35	4909	1.61773	1	0.915259	94.8258
GOTERM_BP_FAT	GO:0006650~glycerophospholipid metabolic process	13	1.10169	0.233448	CPT1B, ALDH5A1, CHPT1, PIGP, ALG9, SEMA6D, SH3GLB1, PLA2G2A, FABP3, PEMT, PIK3CA, ALG12, AGPAT2	867	54	4909	1.36309	1	0.96891	99.2064
Annotation Cluster 32	Enrichment Score: 2.212571034272081
Category	Term	Count	%	PValue	Genes	List Total	Pop Hits	Pop Total	Fold Enrichment	Bonferroni	Benjamini	FDR
INTERPRO	IPR012674:Calycin	8	0.677966	0.000126796	RBP4, PTGDS, RBP1, APOD, FABP3, FABP4, FABP7, FABP5	1022	9	5842	5.0811	0.18425	0.18425	0.212204
INTERPRO	IPR000566:Lipocalin-related protein and Bos/Can/Equ allergen	8	0.677966	0.000126796	RBP4, PTGDS, RBP1, APOD, FABP3, FABP4, FABP7, FABP5	1022	9	5842	5.0811	0.18425	0.18425	0.212204
GOTERM_MF_FAT	GO:0005501~retinoid binding	4	0.338983	0.0707955	RBP4, PTGDS, RBP1, APOD	816	6	4649	3.7982	1	0.868707	69.4468
GOTERM_MF_FAT	GO:0019840~isoprenoid binding	4	0.338983	0.0707955	RBP4, PTGDS, RBP1, APOD	816	6	4649	3.7982	1	0.868707	69.4468
INTERPRO	IPR002345:Lipocalin	4	0.338983	0.10738	RBP4, PTGDS, APOD, FCN1	1022	7	5842	3.26642	1	0.998147	85.0878
Annotation Cluster 33	Enrichment Score: 1.9917425590657738
Category	Term	Count	%	PValue	Genes	List Total	Pop Hits	Pop Total	Fold Enrichment	Bonferroni	Benjamini	FDR
GOTERM_BP_FAT	GO:0006766~vitamin metabolic process	18	1.52542	1.53544e-05	ME1, RBP4, SHMT1, NAMPT, ACADM, GCLC, PDXK, RBP1, DHRS9, SLC19A3, BBOX1, MMAB, DHRS3, MCCC1, QPRT, FPGS, ALDH9A1, RETSAT	867	34	4909	2.99756	0.0492616	0.00194105	0.0279286
GOTERM_BP_FAT	GO:0006767~water-soluble vitamin metabolic process	13	1.10169	9.61983e-05	ME1, NAMPT, SHMT1, PDXK, GCLC, ACADM, MCCC1, SLC19A3, QPRT, FPGS, MMAB, ALDH9A1, BBOX1	867	22	4909	3.34576	0.271311	0.00768998	0.174857
GOTERM_BP_FAT	GO:0009110~vitamin biosynthetic process	6	0.508475	0.0629512	ME1, NAMPT, PDXK, DHRS9, QPRT, MMAB	867	13	4909	2.61326	1	0.70547	69.3588
GOTERM_BP_FAT	GO:0042364~water-soluble vitamin biosynthetic process	5	0.423729	0.146535	ME1, NAMPT, PDXK, QPRT, MMAB	867	12	4909	2.35919	1	0.910494	94.4006
GOTERM_BP_FAT	GO:0019359~nicotinamide nucleotide biosynthetic process	3	0.254237	0.286813	ME1, NAMPT, QPRT	867	6	4909	2.83103	1	0.982982	99.7864
GOTERM_BP_FAT	GO:0019363~pyridine nucleotide biosynthetic process	3	0.254237	0.286813	ME1, NAMPT, QPRT	867	6	4909	2.83103	1	0.982982	99.7864
Annotation Cluster 34	Enrichment Score: 1.990958912994644
Category	Term	Count	%	PValue	Genes	List Total	Pop Hits	Pop Total	Fold Enrichment	Bonferroni	Benjamini	FDR
GOTERM_BP_FAT	GO:0019748~secondary metabolic process	18	1.52542	0.000138541	ME1, GPD1, RBP4, NAMPT, TALDO1, RBP1, PGD, DHRS9, DHRS3, TP53I3, G6PD, BCL2, IDH1, QPRT, RPIA, IDI1, MDH1, RETSAT	867	39	4909	2.61326	0.36608	0.0103063	0.251731
GOTERM_BP_FAT	GO:0043603~cellular amide metabolic process	16	1.35593	0.000193908	ME1, GPD1, NAMPT, TALDO1, ASS1, STAT5A, PGD, TP53I3, G6PD, ARG2, MCCC1, IDH1, QPRT, RPIA, MDH1, GHR	867	33	4909	2.74524	0.471663	0.0129364	0.352166
GOTERM_BP_FAT	GO:0006733~oxidoreduction coenzyme metabolic process	14	1.18644	0.00258872	ME1, GPD1, NAMPT, TP53I3, TALDO1, G6PD, PGD, IDH1, COQ9, QPRT, RPIA, PDSS2, MDH1, COQ6	867	33	4909	2.40208	0.999802	0.0976439	4.60599
GOTERM_MF_FAT	GO:0050661~NADP or NADPH binding	9	0.762712	0.00472059	ME1, TP53I3, G6PD, HMGCR, PGD, IDH1, SPR, DECR1, CAT	816	17	4649	3.01622	0.996397	0.31276	7.35631
GOTERM_BP_FAT	GO:0006739~NADP metabolic process	7	0.59322	0.00611763	ME1, TP53I3, TALDO1, G6PD, PGD, IDH1, RPIA	867	11	4909	3.60312	1	0.186174	10.5627
GOTERM_BP_FAT	GO:0006769~nicotinamide metabolic process	11	0.932203	0.00704322	ME1, NAMPT, GPD1, TP53I3, TALDO1, G6PD, PGD, IDH1, QPRT, RPIA, MDH1	867	25	4909	2.4913	1	0.202097	12.0658
GOTERM_BP_FAT	GO:0019362~pyridine nucleotide metabolic process	11	0.932203	0.00704322	ME1, NAMPT, GPD1, TP53I3, TALDO1, G6PD, PGD, IDH1, QPRT, RPIA, MDH1	867	25	4909	2.4913	1	0.202097	12.0658
GOTERM_BP_FAT	GO:0046496~nicotinamide nucleotide metabolic process	11	0.932203	0.00704322	ME1, NAMPT, GPD1, TP53I3, TALDO1, G6PD, PGD, IDH1, QPRT, RPIA, MDH1	867	25	4909	2.4913	1	0.202097	12.0658
GOTERM_BP_FAT	GO:0009820~alkaloid metabolic process	11	0.932203	0.00967427	ME1, NAMPT, GPD1, TP53I3, TALDO1, G6PD, PGD, IDH1, QPRT, RPIA, MDH1	867	26	4909	2.39548	1	0.262584	16.2093
GOTERM_BP_FAT	GO:0019321~pentose metabolic process	5	0.423729	0.0214644	TALDO1, G6PD, PYGL, PGD, RPIA	867	7	4909	4.04432	1	0.42748	32.6135
UP_SEQ_FEATURE	binding site:NADP	7	0.59322	0.0405338	ME1, MTHFD1, TP53I3, G6PD, AKR1E2, IDH1, SPR	1081	16	6370	2.57805	1	0.98728	52.0199
SP_PIR_KEYWORDS	pentose phosphate pathway	4	0.338983	0.0650819	ALDOA, TALDO1, G6PD, PGD	1082	6	6373	3.92668	1	0.487621	63.2005
KEGG_PATHWAY	hsa00030:Pentose phosphate pathway	7	0.59322	0.0703576	ALDOA, TALDO1, G6PD, PGM1, PGD, TKT, RPIA	427	15	2054	2.24481	0.999998	0.436803	59.3209
GOTERM_BP_FAT	GO:0006098~pentose-phosphate shunt	4	0.338983	0.109812	TALDO1, G6PD, PGD, RPIA	867	7	4909	3.23546	1	0.851026	87.95
GOTERM_BP_FAT	GO:0019674~NAD metabolic process	4	0.338983	0.460139	NAMPT, GPD1, QPRT, MDH1	867	14	4909	1.61773	1	0.997388	99.9987
Annotation Cluster 35	Enrichment Score: 1.9450647831600056
Category	Term	Count	%	PValue	Genes	List Total	Pop Hits	Pop Total	Fold Enrichment	Bonferroni	Benjamini	FDR
GOTERM_BP_FAT	GO:0051180~vitamin transport	8	0.677966	0.000886432	CPT1B, SLC25A20, RBP4, CPT2, SLC5A6, SLC22A5, SLC19A1, TCN2	867	11	4909	4.11786	0.94594	0.0419992	1.60035
GOTERM_BP_FAT	GO:0032365~intracellular lipid transport	6	0.508475	0.00259214	CPT1B, SLC25A20, CPT2, NPC2, ABCA1, ABCG1	867	7	4909	4.85319	0.999804	0.0966608	4.61194
GOTERM_BP_FAT	GO:0015695~organic cation transport	7	0.59322	0.00611763	CPT1B, SLC25A20, CPT2, SLC12A5, SLC22A3, SLC22A5, AQP1	867	11	4909	3.60312	1	0.186174	10.5627
GOTERM_BP_FAT	GO:0015838~betaine transport	4	0.338983	0.0190085	CPT1B, SLC25A20, CPT2, SLC22A5	867	4	4909	5.66205	1	0.404016	29.4697
GOTERM_BP_FAT	GO:0015879~carnitine transport	4	0.338983	0.0190085	CPT1B, SLC25A20, CPT2, SLC22A5	867	4	4909	5.66205	1	0.404016	29.4697
GOTERM_BP_FAT	GO:0015697~quaternary ammonium group transport	5	0.423729	0.0214644	CPT1B, SLC25A20, CPT2, SLC22A3, SLC22A5	867	7	4909	4.04432	1	0.42748	32.6135
GOTERM_BP_FAT	GO:0051181~cofactor transport	6	0.508475	0.0306514	CPT1B, SLC25A20, CPT2, SLC5A6, SLC22A5, SLC19A1	867	11	4909	3.08839	1	0.523925	43.2394
GOTERM_BP_FAT	GO:0006853~carnitine shuttle	3	0.254237	0.0823246	CPT1B, SLC25A20, CPT2	867	3	4909	5.66205	1	0.781205	79.0469
Annotation Cluster 36	Enrichment Score: 1.9342618857458345
Category	Term	Count	%	PValue	Genes	List Total	Pop Hits	Pop Total	Fold Enrichment	Bonferroni	Benjamini	FDR
GOTERM_BP_FAT	GO:0010885~regulation of cholesterol storage	7	0.59322	0.000176717	LPL, CD36, PPARG, SCARB1, ABCA1, ABCG1, NR1H3	867	7	4909	5.66205	0.440913	0.0120405	0.320992
GOTERM_BP_FAT	GO:0010743~regulation of foam cell differentiation	9	0.762712	0.000506561	LPL, CD36, AGT, PPARG, PLA2G2A, ABCA1, ADIPOQ, ABCG1, NR1H3	867	13	4909	3.91988	0.811189	0.0278589	0.917521
GOTERM_BP_FAT	GO:0010883~regulation of lipid storage	8	0.677966	0.00180494	LPL, CD36, PPARG, PNPLA2, SCARB1, ABCA1, ABCG1, NR1H3	867	12	4909	3.7747	0.997377	0.0733692	3.23304
GOTERM_BP_FAT	GO:0010887~negative regulation of cholesterol storage	4	0.338983	0.0190085	PPARG, ABCA1, ABCG1, NR1H3	867	4	4909	5.66205	1	0.404016	29.4697
GOTERM_BP_FAT	GO:0010745~negative regulation of foam cell differentiation	5	0.423729	0.0214644	PPARG, ABCA1, ADIPOQ, ABCG1, NR1H3	867	7	4909	4.04432	1	0.42748	32.6135
GOTERM_BP_FAT	GO:0010888~negative regulation of lipid storage	5	0.423729	0.037018	PPARG, PNPLA2, ABCA1, ABCG1, NR1H3	867	8	4909	3.53878	1	0.572587	49.6516
GOTERM_BP_FAT	GO:0010886~positive regulation of cholesterol storage	3	0.254237	0.0823246	LPL, CD36, SCARB1	867	3	4909	5.66205	1	0.781205	79.0469
BIOCARTA	h_nuclearRsPathway:Nuclear Receptors in Lipid Metabolism and Toxicity	5	0.423729	0.133469	PPARG, ABCD2, ABCA1, ABCG1, NR1H3	133	11	703	2.4026	1	0.978666	83.0919
GOTERM_BP_FAT	GO:0010884~positive regulation of lipid storage	3	0.254237	0.145641	LPL, CD36, SCARB1	867	4	4909	4.24654	1	0.910062	94.2928
Annotation Cluster 37	Enrichment Score: 1.931759705067632
Category	Term	Count	%	PValue	Genes	List Total	Pop Hits	Pop Total	Fold Enrichment	Bonferroni	Benjamini	FDR
GOTERM_MF_FAT	GO:0004091~carboxylesterase activity	15	1.27119	0.00262344	LPL, CES2, ACHE, PLA2G16, CES1, ABHD15, ACOT2, ACOT1, PNPLA2, ABHD1, PNPLA3, PRDX6, PLA2G12A, PLA2G2A, MGLL	816	37	4649	2.30972	0.955991	0.229165	4.15323
SP_PIR_KEYWORDS	serine esterase	7	0.59322	0.0136984	ACHE, CES2, CES1, ACOT2, MGLL, ACOT1, ABHD1	1082	13	6373	3.17155	0.999822	0.185827	18.5267
UP_SEQ_FEATURE	active site:Charge relay system	14	1.18644	0.0445842	LPL, CES2, ACHE, CES1, ABHD15, HMGCR, ACOT2, ACOT1, BPHL, ABHD1, TYSND1, MGLL, PCSK9, CFD	1081	47	6370	1.75527	1	0.990204	55.4904
Annotation Cluster 38	Enrichment Score: 1.861856225410776
Category	Term	Count	%	PValue	Genes	List Total	Pop Hits	Pop Total	Fold Enrichment	Bonferroni	Benjamini	FDR
GOTERM_MF_FAT	GO:0019842~vitamin binding	25	2.11864	3.09454e-05	HACL1, RBP4, SHMT1, SHMT2, PDXK, RBP1, NDUFAB1, SLC19A3, ACACB, OGDH, SLC19A1, TCN2, ALAS1, PYGM, PYGL, CSAD, MCCC1, FASN, ILVBL, DMGDH, GPT, THNSL1, DHTKD1, GPT2, PC	816	60	4649	2.37388	0.036126	0.00611368	0.0499594
GOTERM_MF_FAT	GO:0030170~pyridoxal phosphate binding	10	0.847458	0.0350512	SHMT1, ALAS1, SHMT2, PDXK, PYGM, PYGL, CSAD, GPT, THNSL1, GPT2	816	27	4649	2.11011	1	0.756862	43.7953
GOTERM_MF_FAT	GO:0070279~vitamin B6 binding	10	0.847458	0.0350512	SHMT1, ALAS1, SHMT2, PDXK, PYGM, PYGL, CSAD, GPT, THNSL1, GPT2	816	27	4649	2.11011	1	0.756862	43.7953
SP_PIR_KEYWORDS	pyridoxal phosphate	10	0.847458	0.0665775	SHMT1, ALAS1, SHMT2, PYGM, PYGL, CSAD, FASN, GPT, THNSL1, GPT2	1082	31	6373	1.90001	1	0.484972	64.0654
INTERPRO	IPR015421:Pyridoxal phosphate-dependent transferase, major region, subdomain 1	6	0.508475	0.193815	SHMT1, ALAS1, SHMT2, CSAD, GPT, GPT2	1022	18	5842	1.90541	1	0.99986	97.2927
Annotation Cluster 39	Enrichment Score: 1.8540720698012998
Category	Term	Count	%	PValue	Genes	List Total	Pop Hits	Pop Total	Fold Enrichment	Bonferroni	Benjamini	FDR
GOTERM_CC_FAT	GO:0044432~endoplasmic reticulum part	47	3.98305	0.00318847	TM7SF2, RTN4, EXTL3, DERL1, HMGCR, WFS1, BSCL2, PDIA4, CALR, ALG9, HLA-DMA, TAPBP, FDFT1, ERO1LB, CEPT1, CASP7, BCL2, DHCR7, AGPAT9, PEMT, VMA21, ERAP1, HSPA5, ASPH, ELOVL6, DHCR24, NSDHL, SREBF1, ACER3, CES2, CES1, SEC11C, AIFM1, ACER2, DHRS9, KTN1, CYP4F12, PSMB8, BCAP31, RDH5, HYOU1, TXNDC12, HSP90B1, SDF2L1, ALG12, SEC23B, RETSAT	848	171	4615	1.49581	0.774221	0.0626555	4.4512
GOTERM_CC_FAT	GO:0005789~endoplasmic reticulum membrane	35	2.9661	0.00874754	TM7SF2, RTN4, EXTL3, DERL1, HMGCR, WFS1, BSCL2, ALG9, FDFT1, TAPBP, ERO1LB, CEPT1, DHCR7, BCL2, CASP7, AGPAT9, VMA21, PEMT, HSPA5, ELOVL6, ASPH, NSDHL, DHCR24, SREBF1, ACER3, SEC11C, ACER2, DHRS9, KTN1, CYP4F12, BCAP31, HSP90B1, ALG12, SEC23B, RETSAT	848	125	4615	1.52382	0.983332	0.140703	11.7741
GOTERM_CC_FAT	GO:0042175~nuclear envelope-endoplasmic reticulum network	36	3.05085	0.0119141	TM7SF2, RTN4, EXTL3, DERL1, HMGCR, WFS1, BSCL2, ALG9, FDFT1, TAPBP, ERO1LB, CEPT1, DHCR7, BCL2, CASP7, AGPAT9, VMA21, PEMT, HSPA5, ELOVL6, ASPH, NSDHL, DHCR24, SREBF1, ACER3, SEC11C, ACER2, DHRS9, KTN1, CYP4F12, BCAP31, HSP90B1, NUCB2, ALG12, SEC23B, RETSAT	848	132	4615	1.48424	0.996247	0.18084	15.7085
GOTERM_CC_FAT	GO:0012505~endomembrane system	78	6.61017	0.115394	RTN4, TM7SF2, S100A6, AP1B1, HIP1R, WFS1, HMGCR, BSCL2, BNIP3, SYNGR1, ALG9, ADORA1, TAPBP, FDFT1, ERO1LB, POMGNT1, SLC2A4, GCOM1, GPX4, CASP7, AGPAT9, VMA21, SV2A, ELOVL6, ASPH, SCAMP5, DHCR24, RAMP2, SCAMP3, PTGER3, NCALD, HLA-A, CHST2, KTN1, DHRS9, BCAP31, NPC1, AAAS, CD36, PTGDS, ARRB1, NUCB2, SORT1, SEC23B, CAV2, CLCN3, EXTL3, DERL1, GRB2, NUP214, CEPT1, RAC3, DHCR7, BCL2, SYN2, PEMT, HSPA5,…	848	370	4615	1.14728	1	0.703494	82.5909
Annotation Cluster 40	Enrichment Score: 1.8508559793945627
Category	Term	Count	%	PValue	Genes	List Total	Pop Hits	Pop Total	Fold Enrichment	Bonferroni	Benjamini	FDR
GOTERM_BP_FAT	GO:0009069~serine family amino acid metabolic process	9	0.762712	0.00181423	SHMT1, SEPHS2, SHMT2, GCLC, GCSH, DMGDH, FPGS, CDO1, GCLM	867	15	4909	3.39723	0.997457	0.0728345	3.24943
GOTERM_BP_FAT	GO:0006544~glycine metabolic process	5	0.423729	0.0214644	SHMT1, SHMT2, GCSH, DMGDH, FPGS	867	7	4909	4.04432	1	0.42748	32.6135
GOTERM_BP_FAT	GO:0009071~serine family amino acid catabolic process	4	0.338983	0.0719486	SHMT1, GCSH, DMGDH, CDO1	867	6	4909	3.7747	1	0.74456	74.2914
Annotation Cluster 41	Enrichment Score: 1.7936242233032162
Category	Term	Count	%	PValue	Genes	List Total	Pop Hits	Pop Total	Fold Enrichment	Bonferroni	Benjamini	FDR
GOTERM_BP_FAT	GO:0034368~protein-lipid complex remodeling	7	0.59322	0.000600968	LPL, APOE, AGT, PLA2G2A, APOC1, SCARB1, ABCG1	867	8	4909	4.9543	0.861624	0.0299691	1.08764
GOTERM_BP_FAT	GO:0034367~macromolecular complex remodeling	7	0.59322	0.000600968	LPL, APOE, AGT, PLA2G2A, APOC1, SCARB1, ABCG1	867	8	4909	4.9543	0.861624	0.0299691	1.08764
GOTERM_BP_FAT	GO:0034369~plasma lipoprotein particle remodeling	7	0.59322	0.000600968	LPL, APOE, AGT, PLA2G2A, APOC1, SCARB1, ABCG1	867	8	4909	4.9543	0.861624	0.0299691	1.08764
SP_PIR_KEYWORDS	vldl	5	0.423729	0.00356261	LPL, APOE, APOC1, VLDLR, APOO	1082	5	6373	5.89002	0.89292	0.0618389	5.16361
GOTERM_BP_FAT	GO:0034381~lipoprotein particle clearance	6	0.508475	0.011382	CD36, APOE, APOC1, SCARB1, ADIPOQ, VLDLR	867	9	4909	3.7747	1	0.287725	18.7992
GOTERM_CC_FAT	GO:0034358~plasma lipoprotein particle	6	0.508475	0.0358768	LPL, APOE, CLU, APOC1, VLDLR, APOO	848	11	4615	2.96848	1	0.393931	40.6029
GOTERM_CC_FAT	GO:0032994~protein-lipid complex	6	0.508475	0.0358768	LPL, APOE, CLU, APOC1, VLDLR, APOO	848	11	4615	2.96848	1	0.393931	40.6029
GOTERM_CC_FAT	GO:0034361~very-low-density lipoprotein particle	5	0.423729	0.0422584	LPL, APOE, APOC1, VLDLR, APOO	848	8	4615	3.40139	1	0.428166	45.969
GOTERM_CC_FAT	GO:0034385~triglyceride-rich lipoprotein particle	5	0.423729	0.0422584	LPL, APOE, APOC1, VLDLR, APOO	848	8	4615	3.40139	1	0.428166	45.969
GOTERM_BP_FAT	GO:0034447~very-low-density lipoprotein particle clearance	3	0.254237	0.0823246	APOE, APOC1, VLDLR	867	3	4909	5.66205	1	0.781205	79.0469
GOTERM_CC_FAT	GO:0042627~chylomicron	3	0.254237	0.0886261	LPL, APOE, APOC1	848	3	4615	5.44222	1	0.642872	73.3705
GOTERM_CC_FAT	GO:0034364~high-density lipoprotein particle	4	0.338983	0.120754	APOE, CLU, APOC1, APOO	848	7	4615	3.10984	1	0.713313	84.036
SP_PIR_KEYWORDS	hdl	3	0.254237	0.270334	APOE, CLU, APOO	1082	6	6373	2.94501	1	0.841797	99.0738
Annotation Cluster 42	Enrichment Score: 1.76721836438841
Category	Term	Count	%	PValue	Genes	List Total	Pop Hits	Pop Total	Fold Enrichment	Bonferroni	Benjamini	FDR
UP_SEQ_FEATURE	binding site:Substrate; via amide nitrogen	11	0.932203	0.000115977	ACADVL, ECH1, ACADM, ACADS, EHHADH, ECHS1, SPR, ACAD8, HIBCH, ACAD11, PCK1	1081	17	6370	3.81292	0.263503	0.0736123	0.205637
SP_PIR_KEYWORDS	Flavoprotein	23	1.94915	0.0010808	ACOX1, ACADM, AIFM2, ACADS, AIFM1, LDHD, POR, PDHB, COQ6, ACADVL, TXNDC12, ERO1LB, L2HGDH, ETFDH, DHODH, DMGDH, ACAD8, PDHA1, ACAD11, ETFB, RETSAT, NQO2, ETFA	1082	67	6373	2.02195	0.491835	0.0267146	1.59356
GOTERM_MF_FAT	GO:0009055~electron carrier activity	31	2.62712	0.00115776	ME1, ACOX1, CYC1, UQCRFS1, BBOX1, GLRX2, ERO1LB, ETFDH, DMGDH, ALDH4A1, ACAD8, ASPH, NDUFS2, ETFB, NDUFS1, NQO2, ETFA, ACADM, ACADS, AIFM1, QDPR, CYP4F12, POR, ACADVL, TXNDC12, DHRS3, CYP27A1, AKR1B1, AOC2, ACAD11, RETSAT	816	99	4649	1.784	0.74776	0.141906	1.85326
GOTERM_MF_FAT	GO:0050660~FAD binding	16	1.35593	0.00153677	ACOX1, ACADM, AIFM2, AIFM1, ACADS, LDHD, COQ6, ACADVL, TXNDC12, ERO1LB, ETFDH, DMGDH, ACAD8, ACAD11, DHCR24, ETFA	816	39	4649	2.33736	0.839367	0.167118	2.45293
UP_SEQ_FEATURE	binding site:FAD	9	0.762712	0.00382442	ACADVL, ACOX1, TXNDC12, ERO1LB, AIFM2, AIFM1, ACADS, ACAD11, NQO2	1081	17	6370	3.11966	0.999959	0.490142	6.57454
UP_SEQ_FEATURE	binding site:Substrate; via carbonyl oxygen	8	0.677966	0.00449283	SAT1, ACADVL, ACADM, CNDP2, ACADS, SETD7, ACAD8, ACAD11	1081	14	6370	3.36725	0.999993	0.523907	7.68086
SP_PIR_KEYWORDS	FAD	22	1.86441	0.00476192	ACOX1, ACADM, AIFM2, AIFM1, ACADS, LDHD, POR, COQ6, ACADVL, TXNDC12, ERO1LB, L2HGDH, ETFDH, DHODH, DMGDH, ACAD8, ACAD11, ETFB, DHCR24, RETSAT, NQO2, ETFA	1082	70	6373	1.85115	0.949616	0.0796509	6.84516
UP_SEQ_FEATURE	nucleotide phosphate-binding region:FAD	13	1.10169	0.00757695	ACADVL, TXNDC12, ACADM, AIFM2, ACADS, AIFM1, ETFDH, ACAD8, ACAD11, POR, ETFA, NQO2, DHCR24	1081	34	6370	2.25309	1	0.671839	12.6274
INTERPRO	IPR013764:Acyl-CoA oxidase/dehydrogenase, type1/2, C-terminal	6	0.508475	0.0608511	ACADVL, ACOX1, ACADM, ACADS, ACAD8, ACAD11	1022	13	5842	2.63827	1	0.991781	65.0673
INTERPRO	IPR013786:Acyl-CoA dehydrogenase/oxidase, N-terminal	6	0.508475	0.0608511	ACADVL, ACOX1, ACADM, ACADS, ACAD8, ACAD11	1022	13	5842	2.63827	1	0.991781	65.0673
INTERPRO	IPR006091:Acyl-CoA oxidase/dehydrogenase, central region	6	0.508475	0.0608511	ACADVL, ACOX1, ACADM, ACADS, ACAD8, ACAD11	1022	13	5842	2.63827	1	0.991781	65.0673
GOTERM_MF_FAT	GO:0003995~acyl-CoA dehydrogenase activity	6	0.508475	0.0614927	ACADVL, ACOX1, ACADM, ACADS, ACAD8, ACAD11	816	13	4649	2.62952	1	0.834147	64.1145
INTERPRO	IPR006092:Acyl-CoA dehydrogenase, N-terminal	5	0.423729	0.0805683	ACADVL, ACADM, ACADS, ACAD8, ACAD11	1022	10	5842	2.85812	1	0.997828	75.5174
INTERPRO	IPR006090:Acyl-CoA oxidase/dehydrogenase, type 1	5	0.423729	0.109723	ACADVL, ACADM, ACADS, ACAD8, ACAD11	1022	11	5842	2.59829	1	0.998014	85.7303
UP_SEQ_FEATURE	binding site:FAD; shared with dimeric partner	3	0.254237	0.135908	ACADS, ACAD8, ACAD11	1081	4	6370	4.41952	1	0.999991	92.5173
UP_SEQ_FEATURE	nucleotide phosphate-binding region:FAD; shared with dimeric partner	3	0.254237	0.135908	ACADS, ACAD8, ACAD11	1081	4	6370	4.41952	1	0.999991	92.5173
INTERPRO	IPR006089:Acyl-CoA dehydrogenase, conserved site	4	0.338983	0.197485	ACADVL, ACADM, ACADS, ACAD8	1022	9	5842	2.54055	1	0.999854	97.4919
PIR_SUPERFAMILY	PIRSF000182:acyl-CoA dehydrogenase	3	0.254237	0.25075	ACADM, ACADS, ACAD8	521	5	2678	3.08407	1	1	98.5101
Annotation Cluster 43	Enrichment Score: 1.7240731377388572
Category	Term	Count	%	PValue	Genes	List Total	Pop Hits	Pop Total	Fold Enrichment	Bonferroni	Benjamini	FDR
GOTERM_BP_FAT	GO:0010885~regulation of cholesterol storage	7	0.59322	0.000176717	LPL, CD36, PPARG, SCARB1, ABCA1, ABCG1, NR1H3	867	7	4909	5.66205	0.440913	0.0120405	0.320992
GOTERM_BP_FAT	GO:0010743~regulation of foam cell differentiation	9	0.762712	0.000506561	LPL, CD36, AGT, PPARG, PLA2G2A, ABCA1, ADIPOQ, ABCG1, NR1H3	867	13	4909	3.91988	0.811189	0.0278589	0.917521
GOTERM_BP_FAT	GO:0034368~protein-lipid complex remodeling	7	0.59322	0.000600968	LPL, APOE, AGT, PLA2G2A, APOC1, SCARB1, ABCG1	867	8	4909	4.9543	0.861624	0.0299691	1.08764
GOTERM_BP_FAT	GO:0034367~macromolecular complex remodeling	7	0.59322	0.000600968	LPL, APOE, AGT, PLA2G2A, APOC1, SCARB1, ABCG1	867	8	4909	4.9543	0.861624	0.0299691	1.08764
GOTERM_BP_FAT	GO:0034369~plasma lipoprotein particle remodeling	7	0.59322	0.000600968	LPL, APOE, AGT, PLA2G2A, APOC1, SCARB1, ABCG1	867	8	4909	4.9543	0.861624	0.0299691	1.08764
GOTERM_BP_FAT	GO:0015918~sterol transport	9	0.762712	0.00181423	NPC1, CD36, NPC2, APOE, CLU, APOC1, SCARB1, ABCA1, ABCG1	867	15	4909	3.39723	0.997457	0.0728345	3.24943
GOTERM_BP_FAT	GO:0030301~cholesterol transport	9	0.762712	0.00181423	NPC1, CD36, NPC2, APOE, CLU, APOC1, SCARB1, ABCA1, ABCG1	867	15	4909	3.39723	0.997457	0.0728345	3.24943
GOTERM_BP_FAT	GO:0033700~phospholipid efflux	5	0.423729	0.00413797	ABCA7, APOE, APOC1, ABCA1, ABCG1	867	5	4909	5.66205	0.999999	0.14065	7.26582
GOTERM_BP_FAT	GO:0055088~lipid homeostasis	10	0.847458	0.0041605	LPL, NPC1, NPC2, APOE, PPARG, PCSK9, FABP4, SCARB1, ABCA1, ABCG1	867	20	4909	2.83103	0.999999	0.139922	7.30399
GOTERM_BP_FAT	GO:0033344~cholesterol efflux	6	0.508475	0.00591075	NPC1, APOE, APOC1, SCARB1, ABCA1, ABCG1	867	8	4909	4.24654	1	0.182147	10.2234
GOTERM_MF_FAT	GO:0005496~steroid binding	9	0.762712	0.0072119	HSD17B10, ESRRA, NPC2, PYGL, PGRMC2, RXRG, HSD11B2, ABCA1, ABCG1	816	18	4649	2.84865	0.999817	0.380047	11.0309
GOTERM_BP_FAT	GO:0055092~sterol homeostasis	8	0.677966	0.00898621	NPC1, NPC2, APOE, PCSK9, FABP4, SCARB1, ABCA1, ABCG1	867	15	4909	3.01976	1	0.248407	15.144
GOTERM_BP_FAT	GO:0042632~cholesterol homeostasis	8	0.677966	0.00898621	NPC1, NPC2, APOE, PCSK9, FABP4, SCARB1, ABCA1, ABCG1	867	15	4909	3.01976	1	0.248407	15.144
GOTERM_BP_FAT	GO:0043691~reverse cholesterol transport	5	0.423729	0.0106802	APOE, CLU, SCARB1, ABCA1, ABCG1	867	6	4909	4.71838	1	0.278989	17.7443
GOTERM_BP_FAT	GO:0015914~phospholipid transport	7	0.59322	0.0165251	ABCA7, NPC2, APOE, ATP9A, APOC1, ABCA1, ABCG1	867	13	4909	3.0488	1	0.369151	26.1499
GOTERM_BP_FAT	GO:0010872~regulation of cholesterol esterification	4	0.338983	0.0190085	APOE, AGT, APOC1, ABCG1	867	4	4909	5.66205	1	0.404016	29.4697
GOTERM_MF_FAT	GO:0015248~sterol transporter activity	4	0.338983	0.0406145	NPC1, APOE, ABCA1, ABCG1	816	5	4649	4.55784	1	0.775504	48.8056
GOTERM_BP_FAT	GO:0065005~protein-lipid complex assembly	4	0.338983	0.0413144	DGAT1, APOE, APOC1, ABCA1	867	5	4909	4.52964	1	0.598777	53.585
GOTERM_BP_FAT	GO:0034377~plasma lipoprotein particle assembly	4	0.338983	0.0413144	DGAT1, APOE, APOC1, ABCA1	867	5	4909	4.52964	1	0.598777	53.585
GOTERM_BP_FAT	GO:0034375~high-density lipoprotein particle remodeling	4	0.338983	0.0413144	APOE, APOC1, SCARB1, ABCG1	867	5	4909	4.52964	1	0.598777	53.585
GOTERM_MF_FAT	GO:0005319~lipid transporter activity	10	0.847458	0.0438991	ABCA7, NPC1, LRP1, APOD, APOE, ATP9A, FABP3, ABCA1, APOL6, ABCG1	816	28	4649	2.03475	1	0.782388	51.5637
GOTERM_BP_FAT	GO:0010744~positive regulation of foam cell differentiation	4	0.338983	0.0719486	LPL, CD36, AGT, PLA2G2A	867	6	4909	3.7747	1	0.74456	74.2914
GOTERM_BP_FAT	GO:0045940~positive regulation of steroid metabolic process	4	0.338983	0.0719486	APOE, AGT, APOC1, ABCG1	867	6	4909	3.7747	1	0.74456	74.2914
GOTERM_MF_FAT	GO:0017127~cholesterol transporter activity	3	0.254237	0.0813613	APOE, ABCA1, ABCG1	816	3	4649	5.6973	1	0.883147	74.5987
GOTERM_BP_FAT	GO:0019218~regulation of steroid metabolic process	7	0.59322	0.0817399	APOE, DHCR7, STAT5A, AGT, LHCGR, APOC1, ABCG1	867	18	4909	2.20191	1	0.780523	78.8027
GOTERM_BP_FAT	GO:0010873~positive regulation of cholesterol esterification	3	0.254237	0.0823246	APOE, AGT, APOC1	867	3	4909	5.66205	1	0.781205	79.0469
GOTERM_BP_FAT	GO:0034374~low-density lipoprotein particle remodeling	3	0.254237	0.0823246	AGT, PLA2G2A, ABCG1	867	3	4909	5.66205	1	0.781205	79.0469
GOTERM_BP_FAT	GO:0032367~intracellular cholesterol transport	3	0.254237	0.145641	NPC2, ABCA1, ABCG1	867	4	4909	4.24654	1	0.910062	94.2928
GOTERM_BP_FAT	GO:0032366~intracellular sterol transport	3	0.254237	0.145641	NPC2, ABCA1, ABCG1	867	4	4909	4.24654	1	0.910062	94.2928
GOTERM_BP_FAT	GO:0051353~positive regulation of oxidoreductase activity	5	0.423729	0.146535	AKT1, APOE, AGT, IL1B, SCARB1	867	12	4909	2.35919	1	0.910494	94.4006
GOTERM_MF_FAT	GO:0015485~cholesterol binding	3	0.254237	0.213014	NPC2, ABCA1, ABCG1	816	5	4649	3.41838	1	0.962137	97.9104
GOTERM_MF_FAT	GO:0032934~sterol binding	3	0.254237	0.354512	NPC2, ABCA1, ABCG1	816	7	4649	2.4417	1	0.99422	99.9149
GOTERM_MF_FAT	GO:0005548~phospholipid transporter activity	4	0.338983	0.455697	ABCA7, ATP9A, ABCA1, ABCG1	816	14	4649	1.6278	1	0.998431	99.9946
GOTERM_BP_FAT	GO:0010594~regulation of endothelial cell migration	3	0.254237	0.603381	APOE, AGT, SCARB1	867	11	4909	1.5442	1	0.999566	100
Annotation Cluster 44	Enrichment Score: 1.6626538479902235
Category	Term	Count	%	PValue	Genes	List Total	Pop Hits	Pop Total	Fold Enrichment	Bonferroni	Benjamini	FDR
GOTERM_BP_FAT	GO:0045923~positive regulation of fatty acid metabolic process	7	0.59322	0.00326425	AGT, PPARG, MLXIPL, PPARGC1A, ADIPOQ, AKT2, NR1H3	867	10	4909	3.96344	0.999979	0.118872	5.77452
GOTERM_BP_FAT	GO:0046889~positive regulation of lipid biosynthetic process	6	0.508475	0.011382	AKT1, SORBS1, AGT, MLXIPL, ABCG1, NR1H3	867	9	4909	3.7747	1	0.287725	18.7992
GOTERM_BP_FAT	GO:0042304~regulation of fatty acid biosynthetic process	4	0.338983	0.0413144	AGT, MLXIPL, APOC1, NR1H3	867	5	4909	4.52964	1	0.598777	53.585
GOTERM_BP_FAT	GO:0045723~positive regulation of fatty acid biosynthetic process	3	0.254237	0.145641	AGT, MLXIPL, NR1H3	867	4	4909	4.24654	1	0.910062	94.2928
Annotation Cluster 45	Enrichment Score: 1.6200910734978362
Category	Term	Count	%	PValue	Genes	List Total	Pop Hits	Pop Total	Fold Enrichment	Bonferroni	Benjamini	FDR
GOTERM_CC_FAT	GO:0005759~mitochondrial matrix	47	3.98305	1.37956e-05	ME3, GRPEL1, MRPS15, PDP2, ATP5B, MRPS11, NDUFAB1, ECHS1, OGDH, HADHA, PDHB, HADHB, ALAS1, LONP1, MCCC1, PITRM1, MRPL18, ALDH4A1, DMGDH, PDHA1, HADH, PDHX, ETFB, MRPL34, HSPA9, ETFA, HSD17B8, PDK1, SHMT2, ACADM, ACO2, ACADS, CS, PDK4, AK3, DLAT, SOD2, TST, PPIF, HAGH, ACADVL, MRPS18C, CYP27A1, ALDH1B1, YARS2, PCCB, PC	848	138	4615	1.85351	0.00640818	0.000459094	0.0196677
GOTERM_CC_FAT	GO:0031980~mitochondrial lumen	47	3.98305	1.37956e-05	ME3, GRPEL1, MRPS15, PDP2, ATP5B, MRPS11, NDUFAB1, ECHS1, OGDH, HADHA, PDHB, HADHB, ALAS1, LONP1, MCCC1, PITRM1, MRPL18, ALDH4A1, DMGDH, PDHA1, HADH, PDHX, ETFB, MRPL34, HSPA9, ETFA, HSD17B8, PDK1, SHMT2, ACADM, ACO2, ACADS, CS, PDK4, AK3, DLAT, SOD2, TST, PPIF, HAGH, ACADVL, MRPS18C, CYP27A1, ALDH1B1, YARS2, PCCB, PC	848	138	4615	1.85351	0.00640818	0.000459094	0.0196677
GOTERM_CC_FAT	GO:0031974~membrane-enclosed lumen	134	11.3559	0.999973	GRPEL1, PDP2, BTD, NDUFAB1, ACSS2, OGDH, HMGN5, PDHB, PNN, PSKH1, MDFIC, ERAP1, PDHA1, CFD, HADH, MRPL34, GNL3, PABPN1, RCOR2, RREB1, MLXIPL, SERPING1, RAD9A, HES6, RRP9, PPARGC1A, PPARGC1B, MRPS18C, YARS2, PCCB, ACAA1, ME1, ME3, MRPS15, MVD, MRPS11, CLU, MYEF2, CALR, HADHA, HADHB, RPS25, STON1-GTF2A1L, SLC29A2, TRIM69, ALDH4A1, SUPT7L, PHB, AK3, SMAD2, DLAT, PPIF, TST, TXNDC12, HYOU1, ATF4, OASL…	848	950	4615	0.767639	1	1	100
GOTERM_CC_FAT	GO:0043233~organelle lumen	131	11.1017	0.999978	GRPEL1, PDP2, BTD, NDUFAB1, ACSS2, OGDH, HMGN5, PDHB, PNN, PSKH1, MDFIC, ERAP1, PDHA1, CFD, HADH, MRPL34, GNL3, PABPN1, RCOR2, RREB1, MLXIPL, SERPING1, RAD9A, HES6, RRP9, PPARGC1A, PPARGC1B, MRPS18C, YARS2, PCCB, ACAA1, ME1, ME3, MRPS15, MVD, MRPS11, CLU, MYEF2, CALR, HADHA, HADHB, RPS25, STON1-GTF2A1L, SLC29A2, TRIM69, ALDH4A1, SUPT7L, PHB, AK3, SMAD2, DLAT, PPIF, TST, TXNDC12, HYOU1, ATF4, OASL…	848	935	4615	0.762492	1	1	100
GOTERM_CC_FAT	GO:0070013~intracellular organelle lumen	127	10.7627	0.999985	GRPEL1, PDP2, BTD, NDUFAB1, ACSS2, OGDH, HMGN5, PDHB, PNN, PSKH1, MDFIC, ERAP1, PDHA1, HADH, MRPL34, GNL3, PABPN1, RCOR2, RREB1, MLXIPL, RAD9A, HES6, RRP9, PPARGC1A, PPARGC1B, MRPS18C, YARS2, PCCB, ACAA1, ME1, ME3, MRPS15, MVD, MRPS11, MYEF2, CALR, HADHA, HADHB, RPS25, STON1-GTF2A1L, SLC29A2, TRIM69, ALDH4A1, SUPT7L, PHB, AK3, SMAD2, DLAT, PPIF, TST, TXNDC12, HYOU1, ATF4, OASL, DNAJB9, ATF3, VCP,…	848	916	4615	0.754543	1	1	100
GOTERM_CC_FAT	GO:0031981~nuclear lumen	64	5.42373	1	BTD, BNIP3, ACSS2, HMGN5, PNN, RTN3, AKT1, PSKH1, ASH2L, MDFIC, CASP7, FGF1, PSMD8, GNL3, PABPN1, ZBTB20, EXOSC8, NOL3, RREB1, RCOR2, MLXIPL, CDK9, TLE1, RAD9A, RRP9, HES6, PPARGC1A, PPARGC1B, TUT1, ADRB2, ME1, POLR2G, MYEF2, TRIB3, STON1-GTF2A1L, TSPYL1, RPS25, SLC29A2, TRIM69, SQSTM1, WDR13, SUPT7L, ZBTB7B, CEBPB, PHB, CEBPG, TRIM27, SMAD2, MAPK11, WWTR1, PCK1, DUSP4, OASL, ATF4, DNAJB9, ATF3, …	848	718	4615	0.4851	1	1	100
Annotation Cluster 46	Enrichment Score: 1.602784297767651
Category	Term	Count	%	PValue	Genes	List Total	Pop Hits	Pop Total	Fold Enrichment	Bonferroni	Benjamini	FDR
GOTERM_BP_FAT	GO:0006720~isoprenoid metabolic process	13	1.10169	0.000169115	RBP4, DHRS3, RBP1, MVD, HMGCR, HMGCS1, FDPS, DHRS9, MVK, IDI1, PDSS2, RETSAT, FDFT1	867	23	4909	3.20029	0.426752	0.0122891	0.307204
KEGG_PATHWAY	hsa00830:Retinol metabolism	7	0.59322	0.00753988	DHRS3, RDH10, DGAT1, DGAT2, DHRS9, RETSAT, RDH5	427	10	2054	3.36721	0.745865	0.0820553	8.90894
GOTERM_BP_FAT	GO:0042572~retinol metabolic process	5	0.423729	0.0106802	RBP4, DHRS3, RBP1, DHRS9, RETSAT	867	6	4909	4.71838	1	0.278989	17.7443
GOTERM_BP_FAT	GO:0042446~hormone biosynthetic process	5	0.423729	0.0214644	CHST8, HSD11B2, HFE, SCARB1, HSD17B8	867	7	4909	4.04432	1	0.42748	32.6135
GOTERM_BP_FAT	GO:0006721~terpenoid metabolic process	6	0.508475	0.0306514	RBP4, DHRS3, RBP1, DHRS9, IDI1, RETSAT	867	11	4909	3.08839	1	0.523925	43.2394
GOTERM_BP_FAT	GO:0010817~regulation of hormone levels	15	1.27119	0.0333499	RBP4, YWHAZ, RBP1, DHRS9, HFE, SMAD2, DHRS3, DGAT1, AGT, CHST8, HSD11B2, SCARB1, ALDH9A1, HSD17B8, RETSAT	867	48	4909	1.76939	1	0.551938	46.0461
GOTERM_BP_FAT	GO:0042445~hormone metabolic process	12	1.01695	0.0491327	RBP4, DHRS3, RBP1, AGT, CHST8, HSD11B2, DHRS9, HFE, SCARB1, ALDH9A1, RETSAT, HSD17B8	867	37	4909	1.83634	1	0.645113	60.009
GOTERM_BP_FAT	GO:0034754~cellular hormone metabolic process	8	0.677966	0.0620153	RBP4, DHRS3, RBP1, HSD11B2, DHRS9, SCARB1, RETSAT, HSD17B8	867	21	4909	2.15697	1	0.704037	68.7973
GOTERM_BP_FAT	GO:0001523~retinoid metabolic process	5	0.423729	0.0828781	RBP4, DHRS3, RBP1, DHRS9, RETSAT	867	10	4909	2.83103	1	0.781749	79.2756
GOTERM_BP_FAT	GO:0016101~diterpenoid metabolic process	5	0.423729	0.0828781	RBP4, DHRS3, RBP1, DHRS9, RETSAT	867	10	4909	2.83103	1	0.781749	79.2756
GOTERM_BP_FAT	GO:0006776~vitamin A metabolic process	5	0.423729	0.0828781	RBP4, DHRS3, RBP1, DHRS9, RETSAT	867	10	4909	2.83103	1	0.781749	79.2756
GOTERM_BP_FAT	GO:0006775~fat-soluble vitamin metabolic process	5	0.423729	0.112722	RBP4, DHRS3, RBP1, DHRS9, RETSAT	867	11	4909	2.57366	1	0.857425	88.6469
Annotation Cluster 47	Enrichment Score: 1.5813522197516388
Category	Term	Count	%	PValue	Genes	List Total	Pop Hits	Pop Total	Fold Enrichment	Bonferroni	Benjamini	FDR
UP_SEQ_FEATURE	site:Important for catalytic activity	8	0.677966	0.000294944	SEPHS2, ECH1, CNDP2, EHHADH, ECHDC2, ECHS1, HADH, HADHA	1081	10	6370	4.71415	0.540623	0.105174	0.522178
GOTERM_MF_FAT	GO:0003857~3-hydroxyacyl-CoA dehydrogenase activity	5	0.423729	0.0104335	HSD17B10, EHHADH, HADH, HADHA, HADHB	816	6	4649	4.74775	0.999996	0.447796	15.5801
INTERPRO	IPR013328:Dehydrogenase, multihelical	5	0.423729	0.0358901	GPD1, EHHADH, PGD, HADH, HADHA	1022	8	5842	3.57265	1	0.974491	45.7901
INTERPRO	IPR006180:3-hydroxyacyl-CoA dehydrogenase, conserved site	3	0.254237	0.1433	EHHADH, HADH, HADHA	1022	4	5842	4.28718	1	0.999462	92.5061
INTERPRO	IPR006176:3-hydroxyacyl-CoA dehydrogenase, NAD binding	3	0.254237	0.1433	EHHADH, HADH, HADHA	1022	4	5842	4.28718	1	0.999462	92.5061
INTERPRO	IPR006108:3-hydroxyacyl-CoA dehydrogenase, C-terminal	3	0.254237	0.1433	EHHADH, HADH, HADHA	1022	4	5842	4.28718	1	0.999462	92.5061
Annotation Cluster 48	Enrichment Score: 1.5760213405920378
Category	Term	Count	%	PValue	Genes	List Total	Pop Hits	Pop Total	Fold Enrichment	Bonferroni	Benjamini	FDR
GOTERM_BP_FAT	GO:0040018~positive regulation of multicellular organism growth	7	0.59322	0.00326425	AKT1, BCL2, STAT5A, AGT, GPAM, TSHR, GHR	867	10	4909	3.96344	0.999979	0.118872	5.77452
GOTERM_BP_FAT	GO:0040014~regulation of multicellular organism growth	12	1.01695	0.00403274	AKT1, ADRB2, APOE, BCL2, STAT5A, AGT, IGF1, PIK3CA, GPAM, TSHR, GHR, ACVR1C	867	27	4909	2.51647	0.999998	0.138756	7.0874
GOTERM_BP_FAT	GO:0045927~positive regulation of growth	10	0.847458	0.0965265	AKT1, ADRB2, EXTL3, BCL2, STAT5A, AGT, MAPT, GPAM, TSHR, GHR	867	32	4909	1.76939	1	0.822783	84.223
GOTERM_BP_FAT	GO:0051240~positive regulation of multicellular organismal process	17	1.44068	0.390737	TF, STAT5A, TLR4, AKT1, CD83, ADRB2, SLC24A2, AGT, BCL2, IL1B, SLC22A5, CA2, TSHR, GPAM, AGPAT2, CD14, GHR	867	83	4909	1.1597	1	0.994062	99.9878
Annotation Cluster 49	Enrichment Score: 1.5757885816174113
Category	Term	Count	%	PValue	Genes	List Total	Pop Hits	Pop Total	Fold Enrichment	Bonferroni	Benjamini	FDR
GOTERM_BP_FAT	GO:0006820~anion transport	17	1.44068	0.00622359	CAV2, CLCN3, PTGER3, SLC25A4, SLC12A5, MARCO, TST, BEST1, SLC16A7, FCN1, SLC25A22, SLC25A1, SLC4A2, CLCN7, ARL6IP5, CLCN4, MPST	867	48	4909	2.00531	1	0.185675	10.736
GOTERM_BP_FAT	GO:0015698~inorganic anion transport	11	0.932203	0.0220864	MARCO, TST, CAV2, CLCN3, BEST1, PTGER3, FCN1, SLC12A5, CLCN7, CLCN4, MPST	867	29	4909	2.14768	1	0.429308	33.3886
GOTERM_BP_FAT	GO:0006821~chloride transport	6	0.508475	0.136291	CAV2, CLCN3, BEST1, SLC12A5, CLCN7, CLCN4	867	16	4909	2.12327	1	0.899287	93.0432
Annotation Cluster 50	Enrichment Score: 1.517438016494758
Category	Term	Count	%	PValue	Genes	List Total	Pop Hits	Pop Total	Fold Enrichment	Bonferroni	Benjamini	FDR
GOTERM_BP_FAT	GO:0008299~isoprenoid biosynthetic process	9	0.762712	0.000230359	MVD, HMGCR, HMGCS1, FDPS, DHRS9, MVK, IDI1, PDSS2, FDFT1	867	12	4909	4.24654	0.531382	0.0144706	0.418234
SP_PIR_KEYWORDS	Isoprene biosynthesis	4	0.338983	0.0998654	FDPS, IDI1, PDSS2, FDFT1	1082	7	6373	3.36572	1	0.594332	79.0474
GOTERM_MF_FAT	GO:0016765~transferase activity, transferring alkyl or aryl (other than methyl) groups	7	0.59322	0.174644	MGST3, DHDDS, FDPS, PDSS2, MMAB, MGST1, FDFT1	816	22	4649	1.81278	1	0.944359	95.4928
INTERPRO	IPR008949:Terpenoid synthase	3	0.254237	0.21197	FDPS, PDSS2, FDFT1	1022	5	5842	3.42975	1	0.999889	98.1515
Annotation Cluster 51	Enrichment Score: 1.4540008018792698
Category	Term	Count	%	PValue	Genes	List Total	Pop Hits	Pop Total	Fold Enrichment	Bonferroni	Benjamini	FDR
GOTERM_CC_FAT	GO:0042824~MHC class I peptide loading complex	4	0.338983	0.0212727	CALR, HLA-DMA, PSMB8, TAPBP	848	4	4615	5.44222	0.999956	0.283947	26.4036
GOTERM_MF_FAT	GO:0042288~MHC class I protein binding	5	0.423729	0.0362364	DERL1, ATP5B, HLA-DMA, PSMB8, TAPBP	816	8	4649	3.56081	1	0.746251	44.8997
GOTERM_MF_FAT	GO:0042287~MHC protein binding	5	0.423729	0.0563677	DERL1, ATP5B, HLA-DMA, PSMB8, TAPBP	816	9	4649	3.16517	1	0.829467	60.8158
Annotation Cluster 52	Enrichment Score: 1.449299723238486
Category	Term	Count	%	PValue	Genes	List Total	Pop Hits	Pop Total	Fold Enrichment	Bonferroni	Benjamini	FDR
GOTERM_MF_FAT	GO:0008374~O-acyltransferase activity	11	0.932203	0.00219874	CPT1B, MOGAT1, CPT2, DGAT1, DGAT2, AGPAT9, AGPAT4, GPAM, LPCAT3, PNPLA3, AGPAT2	816	22	4649	2.84865	0.926992	0.211739	3.49204
SP_PIR_KEYWORDS	phospholipid biosynthesis	12	1.01695	0.00998617	CPT1B, CEPT1, CRLS1, LPGAT1, AGPAT9, PEMT, PCYT2, AGPAT4, GPAM, LPCAT3, CHPT1, AGPAT2	1082	31	6373	2.28001	0.998132	0.145355	13.8508
SMART	SM00563:PlsC	5	0.423729	0.0871149	LPGAT1, AGPAT9, AGPAT4, GPAM, AGPAT2	425	13	3133	2.83529	1	0.976533	69.3278
UP_SEQ_FEATURE	short sequence motif:HXXXXD motif	5	0.423729	0.16534	LPGAT1, AGPAT9, AGPAT4, GPAM, AGPAT2	1081	13	6370	2.26642	1	0.999993	95.9547
INTERPRO	IPR002123:Phospholipid/glycerol acyltransferase	5	0.423729	0.179249	LPGAT1, AGPAT9, AGPAT4, GPAM, AGPAT2	1022	13	5842	2.19855	1	0.999811	96.3456
Annotation Cluster 53	Enrichment Score: 1.4359770207223184
Category	Term	Count	%	PValue	Genes	List Total	Pop Hits	Pop Total	Fold Enrichment	Bonferroni	Benjamini	FDR
GOTERM_MF_FAT	GO:0003988~acetyl-CoA C-acyltransferase activity	4	0.338983	0.0186687	ACAA2, HADHA, ACAA1, HADHB	816	4	4649	5.6973	1	0.591913	26.2371
INTERPRO	IPR002155:Thiolase	5	0.423729	0.0207819	ACAA2, ACO2, ACAT2, ACAA1, HADHB	1022	7	5842	4.08303	1	0.910104	29.6592
GOTERM_MF_FAT	GO:0016408~C-acyltransferase activity	6	0.508475	0.0298801	ACAA2, SLC27A3, ACAT2, HADHA, ACAA1, HADHB	816	11	4649	3.10762	1	0.724228	38.7291
PIR_SUPERFAMILY	PIRSF000429:Ac-CoA_Ac_transf	5	0.423729	0.0299283	ACAA2, ACO2, ACAT2, ACAA1, HADHB	521	7	2678	3.67151	1	0.995953	35.7731
UP_SEQ_FEATURE	active site:Acyl-thioester intermediate	4	0.338983	0.0650057	ACAA2, ACAT2, ACAA1, HADHB	1081	6	6370	3.92846	1	0.998218	69.667
INTERPRO	IPR016038:Thiolase-like, subgroup	4	0.338983	0.10738	ACAA2, FASN, ACAT2, ACAA1	1022	7	5842	3.26642	1	0.998147	85.0878
Annotation Cluster 54	Enrichment Score: 1.4189403530308597
Category	Term	Count	%	PValue	Genes	List Total	Pop Hits	Pop Total	Fold Enrichment	Bonferroni	Benjamini	FDR
GOTERM_MF_FAT	GO:0004091~carboxylesterase activity	15	1.27119	0.00262344	LPL, CES2, ACHE, PLA2G16, CES1, ABHD15, ACOT2, ACOT1, PNPLA2, ABHD1, PNPLA3, PRDX6, PLA2G12A, PLA2G2A, MGLL	816	37	4649	2.30972	0.955991	0.229165	4.15323
GOTERM_MF_FAT	GO:0004623~phospholipase A2 activity	5	0.423729	0.02099	PLA2G16, PRDX6, PLA2G12A, PLA2G2A, PNPLA3	816	7	4649	4.0695	1	0.620958	29.0048
SP_PIR_KEYWORDS	lipid degradation	10	0.847458	0.0552265	LPL, PLA2G16, PRDX6, PLA2G12A, PLBD1, PLA2G2A, PLCD4, PLCD1, PNPLA2, PNPLA3	1082	30	6373	1.96334	1	0.436506	56.9975
GOTERM_MF_FAT	GO:0004620~phospholipase activity	9	0.762712	0.1409	LPL, PLA2G16, PRDX6, PLA2G12A, PLA2G2A, MGLL, PLCD4, PLCD1, PNPLA3	816	30	4649	1.70919	1	0.929736	91.3916
GOTERM_MF_FAT	GO:0016298~lipase activity	10	0.847458	0.187652	LPL, PLA2G16, PRDX6, PLA2G12A, PLA2G2A, MGLL, PLCD4, PLCD1, PNPLA2, PNPLA3	816	37	4649	1.53981	1	0.952674	96.5126
Annotation Cluster 55	Enrichment Score: 1.39638494950299
Category	Term	Count	%	PValue	Genes	List Total	Pop Hits	Pop Total	Fold Enrichment	Bonferroni	Benjamini	FDR
SP_PIR_KEYWORDS	thiamine pyrophosphate	7	0.59322	0.000482504	HACL1, ILVBL, TKT, PDHA1, OGDH, DHTKD1, PDHB	1082	8	6373	5.15377	0.260751	0.0136389	0.714368
INTERPRO	IPR005475:Transketolase, central region	4	0.338983	0.0402963	TKT, OGDH, DHTKD1, PDHB	1022	5	5842	4.57299	1	0.979465	49.7945
GOTERM_MF_FAT	GO:0016624~oxidoreductase activity, acting on the aldehyde or oxo group of donors, disulfide as acceptor	4	0.338983	0.0707955	PDHA1, OGDH, DHTKD1, PDHB	816	6	4649	3.7982	1	0.868707	69.4468
SP_PIR_KEYWORDS	thiamin pyrophosphate	3	0.254237	0.136016	PDHA1, OGDH, PDHB	1082	4	6373	4.41751	1	0.686046	88.603
INTERPRO	IPR001017:Dehydrogenase, E1 component	3	0.254237	0.1433	PDHA1, OGDH, DHTKD1	1022	4	5842	4.28718	1	0.999462	92.5061
SP_PIR_KEYWORDS	glycolysis	7	0.59322	0.155984	ALDOA, HK2, PDHA1, DLAT, OGDH, DHTKD1, PDHB	1082	22	6373	1.8741	1	0.717423	91.9473
Annotation Cluster 56	Enrichment Score: 1.301511981304713
Category	Term	Count	%	PValue	Genes	List Total	Pop Hits	Pop Total	Fold Enrichment	Bonferroni	Benjamini	FDR
GOTERM_BP_FAT	GO:0006101~citrate metabolic process	6	0.508475	0.00259214	ACO2, ACO1, STAT5A, CS, ACLY, GHR	867	7	4909	4.85319	0.999804	0.0966608	4.61194
KEGG_PATHWAY	hsa00020:Citrate cycle (TCA cycle)	12	1.01695	0.00705956	ACO2, ACO1, CS, IDH1, ACLY, PDHA1, DLAT, OGDH, PDHB, PC, PCK1, MDH1	427	25	2054	2.30895	0.722605	0.0819354	8.36392
KEGG_PATHWAY	hsa00630:Glyoxylate and dicarboxylate metabolism	7	0.59322	0.0227262	MTHFD1, PGP, ACO2, ACO1, CS, MDH1, HYI	427	12	2054	2.80601	0.984406	0.187829	24.6797
GOTERM_BP_FAT	GO:0009060~aerobic respiration	10	0.847458	0.0285826	UQCRC2, ME3, ACO2, UQCRH, ACO1, CS, IDH1, CAT, PDHB, MDH1	867	26	4909	2.17771	1	0.50417	40.9947
GOTERM_BP_FAT	GO:0006084~acetyl-CoA metabolic process	8	0.677966	0.0620153	ACO2, MLYCD, ACO1, CS, IDH1, DLAT, PDHB, MDH1	867	21	4909	2.15697	1	0.704037	68.7973
GOTERM_BP_FAT	GO:0009109~coenzyme catabolic process	7	0.59322	0.125544	ALDH1L1, ACO2, ACO1, CS, IDH1, PDHB, MDH1	867	20	4909	1.98172	1	0.881422	91.2881
SP_PIR_KEYWORDS	tricarboxylic acid cycle	6	0.508475	0.147388	ACO2, ACO1, CS, IDH1, OGDH, MDH1	1082	17	6373	2.07883	1	0.699588	90.6391
GOTERM_BP_FAT	GO:0051187~cofactor catabolic process	7	0.59322	0.178439	ALDH1L1, ACO2, ACO1, CS, IDH1, PDHB, MDH1	867	22	4909	1.80156	1	0.94135	97.2001
GOTERM_BP_FAT	GO:0006099~tricarboxylic acid cycle	6	0.508475	0.199198	ACO2, ACO1, CS, IDH1, PDHB, MDH1	867	18	4909	1.88735	1	0.951808	98.2423
GOTERM_BP_FAT	GO:0046356~acetyl-CoA catabolic process	6	0.508475	0.199198	ACO2, ACO1, CS, IDH1, PDHB, MDH1	867	18	4909	1.88735	1	0.951808	98.2423

## Sheet: group4_earlydownreg
Annotation Cluster 1	Enrichment Score: 15.85217522109864
Category	Term	Count	%	PValue	Genes	List Total	Pop Hits	Pop Total	Fold Enrichment	Bonferroni	Benjamini	FDR
GOTERM_BP_FAT	GO:0007155~cell adhesion	123	8.11346	1.43118e-17	CTNNAL1, LMO7, POSTN, EDIL3, CD2AP, VCL, S1PR1, CD44, CTGF, ILK, TGFBI, COL12A1, SPON2, NEGR1, ADAM9, ROCK1, MAGI1, ACTN1, MYH9, CTNNA1, SIRPA, HES1, TNFAIP6, RND3, NME2, HAS1, ATP2C1, LAMC1, TGFB1I1, DST, DCBLD2, DCBLD1, CCL2, TNFRSF12A, PTK7, ITGA11, IL32, ITGB1, PXN, ITGBL1, ALCAM, TRO, ITGAV, SSX2IP, FN1, NPHP1, B4GALT1, LPP, CNKSR3, PPFIBP1, ITGA1, ITGA4, EMILIN2, TPBG, PCDH18, EMILIN1, OMD,…	1149	262	4909	2.00575	5.14651e-14	5.14651e-14	2.62908e-14
GOTERM_BP_FAT	GO:0022610~biological adhesion	123	8.11346	2.08011e-17	CTNNAL1, LMO7, POSTN, EDIL3, CD2AP, VCL, S1PR1, CD44, CTGF, ILK, TGFBI, COL12A1, SPON2, NEGR1, ADAM9, ROCK1, MAGI1, ACTN1, MYH9, CTNNA1, SIRPA, HES1, TNFAIP6, RND3, NME2, HAS1, ATP2C1, LAMC1, TGFB1I1, DST, DCBLD2, DCBLD1, CCL2, TNFRSF12A, PTK7, ITGA11, IL32, ITGB1, PXN, ITGBL1, ALCAM, TRO, ITGAV, SSX2IP, FN1, NPHP1, B4GALT1, LPP, CNKSR3, PPFIBP1, ITGA1, ITGA4, EMILIN2, TPBG, PCDH18, EMILIN1, OMD,…	1149	263	4909	1.99812	7.48006e-14	3.74003e-14	3.82116e-14
SP_PIR_KEYWORDS	cell adhesion	73	4.8153	9.32601e-15	BCAR1, POSTN, EDIL3, VCL, WISP1, CD44, CTGF, TGFBI, COL12A1, ZYX, SPON2, BOC, NEGR1, DPP4, CYR61, ICAM1, FBLIM1, PCDH7, CTNNA1, TNFAIP6, LAMC1, ADAM12, DST, TNFRSF12A, TNC, PTK7, ITGA11, CTNND1, KITLG, CDH2, NEO1, ITGB1, PXN, APLP1, VCAM1, ALCAM, CD9, SORBS3, COL7A1, TRO, ITGAV, COMP, COL6A3, COL6A2, COL6A1, SSX2IP, COL8A1, THBS1, THBS2, THBS3, FN1, FLRT2, TNXB, LPP, COL13A1, ITGA1, NFASC, ITGA4,…	1436	137	6373	2.36479	5.71676e-12	1.90559e-12	1.38112e-11
Annotation Cluster 2	Enrichment Score: 13.365571790856526
Category	Term	Count	%	PValue	Genes	List Total	Pop Hits	Pop Total	Fold Enrichment	Bonferroni	Benjamini	FDR
SP_PIR_KEYWORDS	disulfide bond	252	16.6227	7.55223e-19	ATP1B1, LTBP1, PEAR1, MASP1, LTBP2, PGF, FST, POSTN, EDIL3, PRKG1, DNASE1L1, HMCN1, CD44, CTGF, FAP, SEMA7A, CCBE1, COL12A1, FAS, RAB27B, ADAM9, RECK, EFNB3, STC2, OLFML2B, COLEC12, TMEM25, SIRPA, PLAUR, ADAMTS6, F3, BACE2, PDGFRA, HLA-DPA1, LAMC1, HS3ST3B1, DCBLD2, DCBLD1, IL1R1, ENPP2, ERBB2, ITGA11, MME, IFI30, BDKRB1, BDKRB2, CD74, ALCAM, PROCR, FGL2, AGRN, GCNT1, PLAT, LGALS3, TGFBR1, CHI3L1…	1436	691	6373	1.6185	4.62951e-16	4.62951e-16	1.11868e-15
UP_SEQ_FEATURE	disulfide bond	240	15.8311	6.57501e-18	ATP1B1, LTBP1, PEAR1, MASP1, LTBP2, PGF, FST, POSTN, EDIL3, PRKG1, DNASE1L1, HMCN1, CD44, CTGF, FAP, SEMA7A, CCBE1, FAS, RAB27B, ADAM9, RECK, EFNB3, OLFML2B, COLEC12, TMEM25, SIRPA, PLAUR, ADAMTS6, F3, BACE2, PDGFRA, HLA-DPA1, LAMC1, HS3ST3B1, DCBLD2, DCBLD1, IL1R1, ENPP2, ERBB2, ITGA11, MME, IFI30, BDKRB1, BDKRB2, CD74, ALCAM, PROCR, FGL2, AGRN, GCNT1, PLAT, LGALS3, TGFBR1, CHI3L1, S100A11, TRIO…	1436	658	6370	1.61797	2.52875e-14	2.52875e-14	1.21669e-14
SP_PIR_KEYWORDS	glycoprotein	367	24.2084	5.96148e-15	LYPD1, CTHRC1, ATP1B1, LTBP1, PEAR1, ADCY7, MASP1, LTBP2, PGF, GPR124, FAM20C, FST, POSTN, LPAR1, ERLEC1, DNASE1L1, S1PR1, HMCN1, CD44, SERPINE2, CTGF, CH25H, FAP, PLOD3, SEMA7A, TRAK1, CCBE1, SERPINE1, CREB3L2, COL12A1, CREB3L1, FAS, PI16, ADAM9, RECK, EFNB3, STC2, CRYAB, OLFML2B, TMEM200A, COLEC12, SIRPA, TMEM25, LPCAT4, PLAUR, ADAMTS6, KRT18, BACE2, F3, PDGFRA, HLA-DPA1, LAMC1, EXT1, HS3ST3B1,…	1436	1168	6373	1.39448	3.67506e-12	1.83753e-12	8.88178e-12
UP_SEQ_FEATURE	glycosylation site:N-linked (GlcNAc...)	348	22.9551	9.85386e-15	LYPD1, CTHRC1, ATP1B1, LTBP1, PEAR1, ADCY7, MASP1, LTBP2, PGF, GPR124, FST, FAM20C, POSTN, LPAR1, ERLEC1, DNASE1L1, HMCN1, S1PR1, CD44, SERPINE2, CTGF, CH25H, FAP, PLOD3, SEMA7A, CCBE1, SERPINE1, CREB3L2, COL12A1, CREB3L1, FAS, PI16, ADAM9, RECK, EFNB3, STC2, OLFML2B, TMEM200A, COLEC12, SIRPA, TMEM25, LPCAT4, PLAUR, ADAMTS6, F3, BACE2, PDGFRA, HLA-DPA1, LAMC1, EXT1, HS3ST3B1, DCBLD2, DCBLD1, IL1R…	1436	1097	6370	1.40721	3.80023e-11	1.90011e-11	1.82854e-11
GOTERM_CC_FAT	GO:0005576~extracellular region	201	13.2586	6.15581e-14	CTHRC1, LTBP1, MASP1, LTBP2, PGF, FST, FAM20C, POSTN, EDIL3, HMCN1, SERPINE2, CD44, ISG15, CTGF, SERPINE1, CCBE1, COL12A1, FAS, PI16, ADAM9, STC2, OLFML2B, TMEM25, PLAUR, ADAMTS6, F3, LAMC1, ENPP2, ERBB2, IFI30, CALU, ITGBL1, CDA, FGL2, AGRN, PLAT, LGALS3, GGH, CHI3L1, EMILIN2, EMILIN1, COL14A1, APOL1, SRPX2, PENK, SFRP2, SFRP4, ENG, PLAU, FGF5, FGF7, NRP1, COL21A1, ARSJ, FLT3LG, SCRG1, SEMA3D, S…	1059	556	4615	1.57542	3.32749e-11	1.10917e-11	8.95506e-11
SP_PIR_KEYWORDS	Secreted	160	10.5541	7.25045e-11	ASPN, CTHRC1, LTBP1, LTBP2, MASP1, PGF, FST, FAM20C, POSTN, EDIL3, TGFB1, MMP1, OLFML1, ST3GAL1, ST3GAL2, HMCN1, SERPINE2, ISG15, PAPPA, CTGF, TGFBI, SERPINE1, CCBE1, COL12A1, PDGFC, FAS, LOX, PDGFD, SPON2, TFPI2, ADAM9, HHIPL1, SCUBE3, STC2, OLFML2B, TMEM25, PCOLCE2, PLAUR, ADAMTS6, COL1A2, MFAP2, LAMC1, COL1A1, NGF, TWSG1, PAM, CCL2, WNT5B, ADAMTSL1, ENPP2, CLU, PAMR1, IL32, CNPY4, GREM1, GREM2…	1436	449	6373	1.58148	4.44452e-08	7.40754e-09	1.07398e-07
SP_PIR_KEYWORDS	signal	281	18.5356	9.10534e-11	LYPD1, CTHRC1, LTBP1, PEAR1, MASP1, LTBP2, GPR124, PGF, FST, FAM20C, POSTN, EDIL3, ERLEC1, DNASE1L1, HMCN1, SERPINE2, CD44, CTGF, PLOD3, SEMA7A, CCBE1, SERPINE1, COL12A1, FAS, PI16, ADAM9, RECK, EFNB3, STC2, OLFML2B, TMEM25, SIRPA, PLAUR, ADAMTS6, F3, BACE2, PDGFRA, HLA-DPA1, LAMC1, DCBLD2, DCBLD1, IL1R1, ENPP2, ERBB2, ITGA11, IFI30, SORCS2, ITGBL1, CALU, ALCAM, PROCR, FGL2, AGRN, TCTN2, PLAT, TG…	1436	902	6373	1.38258	5.58157e-08	7.97368e-09	1.34873e-07
UP_SEQ_FEATURE	signal peptide	281	18.5356	1.00357e-10	LYPD1, CTHRC1, LTBP1, PEAR1, MASP1, LTBP2, GPR124, PGF, FST, FAM20C, POSTN, EDIL3, ERLEC1, DNASE1L1, HMCN1, SERPINE2, CD44, CTGF, PLOD3, SEMA7A, CCBE1, SERPINE1, COL12A1, FAS, PI16, ADAM9, RECK, EFNB3, STC2, OLFML2B, TMEM25, SIRPA, PLAUR, ADAMTS6, F3, BACE2, PDGFRA, HLA-DPA1, LAMC1, DCBLD2, DCBLD1, IL1R1, ENPP2, ERBB2, ITGA11, IFI30, SORCS2, ITGBL1, CALU, ALCAM, PROCR, FGL2, AGRN, TCTN2, PLAT, TG…	1436	902	6370	1.38193	3.85973e-07	1.28658e-07	1.85708e-07
Annotation Cluster 3	Enrichment Score: 12.936910822280963
Category	Term	Count	%	PValue	Genes	List Total	Pop Hits	Pop Total	Fold Enrichment	Bonferroni	Benjamini	FDR
GOTERM_MF_FAT	GO:0008092~cytoskeletal protein binding	118	7.78364	2.58827e-15	ENAH, PDLIM5, CAPZA1, LMO7, VCL, PACSIN2, KIFAP3, PLS3, ACTN4, CRYAB, ACTN1, TMSB10, MYH9, CTNNA1, FARP1, FARP2, ARPC1B, NME2, TAGLN, CLIP2, STMN1, DST, ADD3, DBN1, ADD2, DIAPH1, DIAPH3, ANLN, ARPC5, FXYD5, ARFGEF1, CAPZB, PXN, CORO2B, SSX2IP, CDC42EP3, FGD4, HIP1, B4GALT1, DIXDC1, PHACTR2, MYO1B, MYO1E, FSCN1, GAS7, CORO1C, SYNE1, MYO10, SPTBN1, TMOD3, WDR1, ANTXR1, MYLK, MYH10, TLN1, MLPH, TTLL…	1081	262	4649	1.93693	2.68374e-12	2.68374e-12	4.06342e-12
GOTERM_MF_FAT	GO:0003779~actin binding	86	5.67282	1.25274e-14	ENAH, TLN1, MLPH, PDLIM5, CAPZA1, LMO7, VCL, TTLL3, DSTN, ACTR3, GSN, NOS3, CAP1, MSN, PLS3, KCNMA1, FMNL3, ACTN4, TRPM7, ACTN1, TMSB10, MYH9, NEXN, FLNC, PALLD, FLNB, VASP, FLNA, EPB41L2, ARPC1B, FMN2, EPB41L1, SMTN, TAGLN, CFL2, LIMCH1, CFL1, TMSB4X, DST, ADD3, DBN1, ADD2, MYO5A, SHROOM3, DIAPH1, CALD1, DIAPH3, FHL3, ANLN, ARPC5, FXYD5, TPM2, TPM1, CAPZB, TPM4, TPM3, CORO2B, EZR, CNN2, CNN1, PL…	1081	171	4649	2.1629	1.31853e-11	6.59273e-12	1.99507e-11
GOTERM_CC_FAT	GO:0015629~actin cytoskeleton	68	4.48549	1.23418e-13	CTNNAL1, PDLIM7, MLPH, PDLIM5, CAPZA1, CD2AP, IQGAP1, TTLL3, DSTN, VCL, ACTR3, ACTG1, GSN, ILK, ZYX, CAP1, SH3PXD2A, ACTN4, ACTA2, CRYAB, MYH9, CTNNA1, PALLD, FLNB, VASP, FLNA, EPB41L2, ARPC1B, FMN2, SMTN, CLIC4, CFL1, FILIP1L, DBN1, DST, MYO18A, ADD2, SEPT9, MYO5A, CALD1, STK17B, FHL3, ANLN, ARPC5, TPM2, TPM1, CAPZB, TPM4, TPM3, MYL9, CORO2B, EZR, SORBS2, BMF, CDC42EP3, MYO1B, MYO1E, FSCN1, SYNP…	1059	127	4615	2.33336	6.67901e-11	1.66975e-11	1.79756e-10
SP_PIR_KEYWORDS	actin-binding	63	4.15567	4.46793e-11	ENAH, CAPZA1, TTLL3, DSTN, VCL, ACTR3, GSN, CAP1, PLS3, ACTN4, ACTN1, TMSB10, MYH9, NEXN, PALLD, FLNC, FLNB, VASP, FLNA, EPB41L2, ARPC1B, EPB41L1, TAGLN, CFL2, CFL1, TMSB4X, ADD3, DBN1, DST, ADD2, MYO5A, SHROOM3, DIAPH1, CALD1, ANLN, ARPC5, TPM2, TPM1, CAPZB, TPM4, TPM3, CORO2B, CNN2, CNN1, FGD4, HIP1, PLEC, DIXDC1, PHACTR2, MYO1B, MYO1E, FSCN1, SYNPO2, COTL1, CORO1C, SYNE1, MYO10, CAPG, TMOD3, S…	1436	127	6373	2.20154	2.73884e-08	5.47768e-09	6.61814e-08
Annotation Cluster 4	Enrichment Score: 10.22318317245443
Category	Term	Count	%	PValue	Genes	List Total	Pop Hits	Pop Total	Fold Enrichment	Bonferroni	Benjamini	FDR
GOTERM_MF_FAT	GO:0003779~actin binding	86	5.67282	1.25274e-14	ENAH, TLN1, MLPH, PDLIM5, CAPZA1, LMO7, VCL, TTLL3, DSTN, ACTR3, GSN, NOS3, CAP1, MSN, PLS3, KCNMA1, FMNL3, ACTN4, TRPM7, ACTN1, TMSB10, MYH9, NEXN, FLNC, PALLD, FLNB, VASP, FLNA, EPB41L2, ARPC1B, FMN2, EPB41L1, SMTN, TAGLN, CFL2, LIMCH1, CFL1, TMSB4X, DST, ADD3, DBN1, ADD2, MYO5A, SHROOM3, DIAPH1, CALD1, DIAPH3, FHL3, ANLN, ARPC5, FXYD5, TPM2, TPM1, CAPZB, TPM4, TPM3, CORO2B, EZR, CNN2, CNN1, PL…	1081	171	4649	2.1629	1.31853e-11	6.59273e-12	1.99507e-11
GOTERM_BP_FAT	GO:0030029~actin filament-based process	70	4.61741	3.76065e-11	RHOJ, TLN1, PDLIM7, BCAR1, CAPZA1, LMO7, PRKG1, TTLL3, DSTN, ACTG1, PACSIN2, GSN, RALA, CAP1, PLS3, FMNL3, ACTN4, ROCK1, LIMK1, TRPM7, PRKCI, ACTN1, TMSB10, MYH9, FLNB, VASP, FLNA, EPB41L2, RND3, FMN2, KRT19, EPB41L1, ATP2C1, LIMCH1, CFL1, TMSB4X, DBN1, DST, ADD2, MYO5A, CXCL1, SHROOM3, DIAPH1, CALD1, DIAPH3, FHL3, ABI2, ARPC5, TPM1, CAPZB, ITGB1, CORO2B, EZR, RAC2, CNN2, CNN1, TRIP10, NPHP1, FGD…	1149	143	4909	2.09139	1.35233e-07	4.50776e-08	6.90833e-08
GOTERM_BP_FAT	GO:0030036~actin cytoskeleton organization	68	4.48549	1.15652e-10	RHOJ, TLN1, PDLIM7, BCAR1, CAPZA1, LMO7, PRKG1, TTLL3, DSTN, ACTG1, PACSIN2, GSN, RALA, CAP1, PLS3, FMNL3, ACTN4, ROCK1, LIMK1, TRPM7, PRKCI, ACTN1, TMSB10, MYH9, FLNB, VASP, FLNA, EPB41L2, RND3, FMN2, KRT19, EPB41L1, ATP2C1, LIMCH1, CFL1, TMSB4X, DBN1, DST, ADD2, CXCL1, SHROOM3, DIAPH1, CALD1, DIAPH3, FHL3, ABI2, ARPC5, TPM1, CAPZB, ITGB1, CORO2B, EZR, RAC2, CNN2, CNN1, TRIP10, NPHP1, FGD4, TNXB…	1149	140	4909	2.07517	4.15884e-07	1.03971e-07	2.12453e-07
GOTERM_BP_FAT	GO:0007010~cytoskeleton organization	90	5.93668	2.34958e-07	RHOJ, KIF23, TLN1, PRC1, PDLIM7, BCAR1, CAPZA1, LMO7, AURKA, PRKG1, TTLL3, DSTN, ACTG1, DES, PACSIN2, GSN, RALA, MICAL1, CAP1, TUBA1B, PLS3, FMNL3, ROCK1, ACTN4, STMN3, LIMK1, CRYAB, TRPM7, PRKCI, NUSAP1, ACTN1, TMSB10, MYH9, TACC3, UBE2C, PALLD, FLNB, VASP, FLNA, EPB41L2, RND3, FMN2, KRT19, EPB41L1, ATP2C1, ZWINT, LIMCH1, CFL1, SGCD, TMSB4X, STMN1, DST, DBN1, ADD2, CXCL1, SHROOM3, DIAPH1, CALD1,…	1149	235	4909	1.63624	0.000844551	0.000105608	0.000431617
Annotation Cluster 5	Enrichment Score: 8.644054832413937
Category	Term	Count	%	PValue	Genes	List Total	Pop Hits	Pop Total	Fold Enrichment	Bonferroni	Benjamini	FDR
GOTERM_CC_FAT	GO:0005856~cytoskeleton	214	14.1161	5.88992e-19	KIFC1, PDLIM7, PDLIM5, STRN, AURKA, CD2AP, ACTG1, KIFAP3, ILK, ROCK1, CRYAB, CTNNA1, MYH9, DCTN1, FARP1, FARP2, NME2, KRT19, KRT18, MAD2L1, NAV1, CC2D2A, MAPK3, PDE4DIP, TGFB1I1, MYO18A, ADD3, DBN1, ADD2, KIF26B, LMNB1, AKAP12, STK17B, CAPZB, PXN, PEA15, CDC42EP1, PROCR, CEP170, CDC42EP3, CDC42EP5, HIP1, PTPN14, PTPN13, ALMS1, CDC20, KIF3C, GAS7, SYNE1, EPS8, MAP4, TMOD3, PARP3, TTLL5, ARL2BP, TT…	1059	554	4615	1.68337	3.18645e-16	3.18645e-16	8.57568e-16
SP_PIR_KEYWORDS	cytoskeleton	123	8.11346	4.42673e-11	CTNNAL1, KIFC1, ENAH, PDLIM7, PRC1, CAPZA1, KNTC1, AURKA, CD2AP, VCL, ACTG1, ANK2, ROCK1, ACTN1, RAI14, TMSB10, CTNNA1, DCTN1, TACC1, ARPC1B, CCDC6, NAV1, CC2D2A, DSP, CLIP2, PDE4DIP, TGFB1I1, SEPT6, MYO18A, DST, ADD3, ADD2, SEPT9, DIAPH1, AKAP12, ANLN, ARPC5, CAPZB, PXN, CORO2B, CDC42EP1, CEP170, CDC42EP3, FGD4, CDC42EP5, NIN, PTPN14, RPGRIP1L, ALMS1, PTPN13, ITGA4, SYNE1, UACA, SPTBN1, TMOD3, P…	1436	318	6373	1.71659	2.71358e-08	6.78396e-09	6.55712e-08
GOTERM_CC_FAT	GO:0044430~cytoskeletal part	130	8.5752	6.0405e-09	KIFC1, PDLIM7, PRC1, CAPZA1, KNTC1, CBX3, STRN, AURKA, CD2AP, IQGAP1, KIFAP3, ILK, TUBG2, ACTN4, ROCK1, CRYAB, PSD3, MYH9, DCTN1, TACC1, ARPC1B, NME2, KRT19, KRT18, MAD2L1, NAV1, CC2D2A, CLIP2, PDE4DIP, STMN1, TNFAIP3, SEPT6, MYO18A, DBN1, FILIP1L, ADD2, SEPT9, KIF26B, LMNB1, ANLN, ARPC5, CAPZB, PXN, MYL9, PEA15, PROCR, CEP170, BMF, TRAF5, NIN, MYO1B, MYO1E, RPGRIP1L, ALMS1, CDC20, MYL12A, KIF3C,…	1059	361	4615	1.56932	3.26791e-06	4.08489e-07	8.79493e-06
GOTERM_CC_FAT	GO:0043228~non-membrane-bounded organelle	303	19.9868	0.000618344	S100A4, KIFC1, HMGN2, PDLIM7, PDLIM5, STRN, CCT2, AURKA, CD2AP, ACTG1, HIST1H2BL, KIFAP3, HIST1H2BI, PRIM2, ILK, RPL26L1, STAG1, ROCK1, CRYAB, MYH9, CTNNA1, DCTN1, FARP1, FARP2, NCAPD2, KRT19, NME2, RFC3, KRT18, MAD2L1, NAV1, ZWINT, MAPK3, CC2D2A, PDE4DIP, TGFB1I1, DBN1, ADD3, MYO18A, ADD2, KIF26B, LMNB1, AKAP12, STK17B, CAPZB, PXN, PEA15, ACD, CDC42EP1, PROCR, CEP170, NAT10, CDC42EP3, HIP1, CDC4…	1059	1140	4615	1.15828	0.284395	0.0132959	0.89654
GOTERM_CC_FAT	GO:0043232~intracellular non-membrane-bounded organelle	303	19.9868	0.000618344	S100A4, KIFC1, HMGN2, PDLIM7, PDLIM5, STRN, CCT2, AURKA, CD2AP, ACTG1, HIST1H2BL, KIFAP3, HIST1H2BI, PRIM2, ILK, RPL26L1, STAG1, ROCK1, CRYAB, MYH9, CTNNA1, DCTN1, FARP1, FARP2, NCAPD2, KRT19, NME2, RFC3, KRT18, MAD2L1, NAV1, ZWINT, MAPK3, CC2D2A, PDE4DIP, TGFB1I1, DBN1, ADD3, MYO18A, ADD2, KIF26B, LMNB1, AKAP12, STK17B, CAPZB, PXN, PEA15, ACD, CDC42EP1, PROCR, CEP170, NAT10, CDC42EP3, HIP1, CDC4…	1059	1140	4615	1.15828	0.284395	0.0132959	0.89654
Annotation Cluster 6	Enrichment Score: 7.637294518895682
Category	Term	Count	%	PValue	Genes	List Total	Pop Hits	Pop Total	Fold Enrichment	Bonferroni	Benjamini	FDR
GOTERM_BP_FAT	GO:0006928~cell motion	87	5.73879	1.57015e-10	NRP2, CTHRC1, PPARD, TLN1, NRP1, PLXNA2, BCAR1, CAPZA1, PRKG1, CD2AP, TGFB1, VCL, DSTN, ACTR3, ACTG1, UNC5B, CD44, CTGF, SEMA3B, NOS3, MSN, ROBO3, CAP1, NR2F2, SPON2, ICAM1, ROCK1, EFNB3, ARID5B, EMX2, MYH9, MMP14, VASP, PLAUR, SLIT3, ARPC1B, HIF1A, CFL1, VCAN, LAMC1, ACVR1, ZFAND5, CCL2, FUT8, TNFRSF12A, ENPP2, ERBB2, CALD1, VIM, ITGA11, ABI2, KITLG, ARPC5, CDH2, TPM1, CAPZB, ITGB1, TPM4, TPM3, …	1149	198	4909	1.87727	5.64627e-07	1.12925e-07	2.88438e-07
GOTERM_BP_FAT	GO:0048870~cell motility	56	3.69393	1.08288e-07	NRP2, CTHRC1, PPARD, NRP1, PLXNA2, BCAR1, PRKG1, CD2AP, TGFB1, CD44, CTGF, NOS3, CAP1, MSN, NR2F2, ICAM1, ROCK1, ARID5B, EMX2, MYH9, MMP14, HIF1A, CFL1, VCAN, LAMC1, ACVR1, ZFAND5, CCL2, FUT8, TNFRSF12A, ITGA11, KITLG, ABI2, CDH2, ITGB1, VCAM1, THBS1, PPAP2B, APC, FN1, PLAT, B4GALT1, IL6, TGFBR1, PODXL, MET, ITGA1, ITGA4, VAV2, CDH13, ETS1, ITGA5, ID1, ENG, PLAU, MYH10	1149	123	4909	1.94516	0.000389328	6.48985e-05	0.000198925
GOTERM_BP_FAT	GO:0051674~localization of cell	56	3.69393	1.08288e-07	NRP2, CTHRC1, PPARD, NRP1, PLXNA2, BCAR1, PRKG1, CD2AP, TGFB1, CD44, CTGF, NOS3, CAP1, MSN, NR2F2, ICAM1, ROCK1, ARID5B, EMX2, MYH9, MMP14, HIF1A, CFL1, VCAN, LAMC1, ACVR1, ZFAND5, CCL2, FUT8, TNFRSF12A, ITGA11, KITLG, ABI2, CDH2, ITGB1, VCAM1, THBS1, PPAP2B, APC, FN1, PLAT, B4GALT1, IL6, TGFBR1, PODXL, MET, ITGA1, ITGA4, VAV2, CDH13, ETS1, ITGA5, ID1, ENG, PLAU, MYH10	1149	123	4909	1.94516	0.000389328	6.48985e-05	0.000198925
GOTERM_BP_FAT	GO:0016477~cell migration	55	3.62797	1.53363e-07	NRP2, CTHRC1, PPARD, NRP1, PLXNA2, BCAR1, PRKG1, CD2AP, TGFB1, CD44, CTGF, NOS3, CAP1, MSN, NR2F2, ICAM1, ROCK1, ARID5B, EMX2, MYH9, MMP14, HIF1A, CFL1, VCAN, LAMC1, ACVR1, ZFAND5, CCL2, FUT8, TNFRSF12A, ITGA11, KITLG, ABI2, CDH2, ITGB1, VCAM1, THBS1, PPAP2B, APC, FN1, PLAT, B4GALT1, IL6, TGFBR1, PODXL, MET, ITGA1, ITGA4, VAV2, CDH13, ITGA5, ID1, ENG, PLAU, MYH10	1149	121	4909	1.942	0.00055134	7.87814e-05	0.000281727
Annotation Cluster 7	Enrichment Score: 7.61267308346289
Category	Term	Count	%	PValue	Genes	List Total	Pop Hits	Pop Total	Fold Enrichment	Bonferroni	Benjamini	FDR
GOTERM_CC_FAT	GO:0031012~extracellular matrix	74	4.88127	3.93992e-10	ASPN, CTHRC1, PODNL1, LTBP1, LTBP2, COL21A1, POSTN, MMP1, TGFB1, RELL2, HMCN1, CD44, CTGF, GPC6, TGFBI, COL12A1, LOX, SPON2, LOXL1, TFPI2, SCUBE3, MMP14, ANXA2P3, ANXA2P2, MMP11, ADAMTS6, BGN, F3, COL1A2, MFAP2, VCAN, COL1A1, LAMC1, DST, ADAMTSL1, WNT5B, ADAMTS14, TNC, LUM, DCN, TIMP3, APLP1, TIMP1, COL7A1, COMP, COL6A3, ACAN, COL6A2, COL6A1, AGRN, ADAMTS12, FBN2, COL8A1, THBS1, FN1, FLRT2, HAPLN…	1059	164	4615	1.96636	2.1315e-07	4.263e-08	5.7365e-07
GOTERM_CC_FAT	GO:0005578~proteinaceous extracellular matrix	70	4.61741	4.24912e-10	ASPN, CTHRC1, PODNL1, LTBP1, LTBP2, COL21A1, POSTN, MMP1, TGFB1, RELL2, HMCN1, CTGF, GPC6, TGFBI, COL12A1, LOX, SPON2, LOXL1, TFPI2, MMP14, ANXA2P3, ANXA2P2, MMP11, ADAMTS6, BGN, COL1A2, MFAP2, VCAN, COL1A1, LAMC1, DST, ADAMTSL1, WNT5B, ADAMTS14, TNC, LUM, DCN, TIMP3, APLP1, TIMP1, COL7A1, COMP, COL6A3, ACAN, COL6A2, COL6A1, AGRN, ADAMTS12, FBN2, COL8A1, FN1, HAPLN1, FLRT2, HAPLN3, TNXB, LGALS3, …	1059	152	4615	2.00692	2.29877e-07	3.83129e-08	6.18669e-07
GOTERM_CC_FAT	GO:0044421~extracellular region part	123	8.11346	6.27538e-10	ASPN, CTHRC1, LTBP1, LTBP2, MASP1, PGF, POSTN, TGFB1, MMP1, RELL2, HMCN1, CD44, SERPINE2, ISG15, CTGF, TGFBI, COL12A1, PDGFC, LOX, SPON2, TFPI2, ADAM9, SCUBE3, ADAMTS6, THBD, F3, COL1A2, MFAP2, KDSR, COL1A1, LAMC1, DST, TNFAIP2, NGF, TWSG1, CCL2, ADAMTSL1, WNT5B, CLU, IL32, GREM1, TIMP3, GREM2, TIMP1, FGL2, AGRN, FN1, PLAT, FKTN, LGALS3, EFEMP2, EFEMP1, GGH, CHI3L1, EMILIN2, EMILIN1, OMD, APOL1, …	1059	326	4615	1.64423	3.39498e-07	4.84997e-08	9.13691e-07
SP_PIR_KEYWORDS	extracellular matrix	50	3.29815	1.01387e-06	ASPN, CTHRC1, PODNL1, COL21A1, POSTN, MMP1, HMCN1, CTGF, TGFBI, COL12A1, SPON2, ANXA2P3, MMP11, ADAMTS6, BGN, COL1A2, VCAN, MFAP2, LAMC1, COL1A1, DST, ADAMTSL1, WNT5B, ADAMTS14, LUM, TNC, DCN, TIMP3, COL7A1, COMP, COL6A3, COL6A2, ACAN, COL6A1, AGRN, ADAMTS12, FBN2, COL8A1, FN1, HAPLN1, HAPLN3, TNXB, COL13A1, FBN1, NID2, EMILIN2, ANXA2, EMILIN1, OMD, COL14A1, KAZALD1	1436	115	6373	1.92957	0.000621308	4.78066e-05	0.00150179
GOTERM_CC_FAT	GO:0044420~extracellular matrix part	30	1.97889	8.11384e-05	LUM, TNC, TIMP3, RELL2, APLP1, HMCN1, COL7A1, COL6A3, ACAN, COL6A1, COL12A1, AGRN, LOX, COL8A1, FN1, TNXB, SCUBE3, COL13A1, EFEMP2, FBN1, NID2, ANXA2P3, ANXA2, ANXA2P2, COL14A1, ERBB2IP, COL1A2, MFAP2, COL1A1, LAMC1, DST	1059	65	4615	2.01133	0.0429481	0.00230774	0.118072
Annotation Cluster 8	Enrichment Score: 5.078356183926304
Category	Term	Count	%	PValue	Genes	List Total	Pop Hits	Pop Total	Fold Enrichment	Bonferroni	Benjamini	FDR
GOTERM_BP_FAT	GO:0001944~vasculature development	58	3.82586	1.61345e-06	NRP2, RTN4, NRP1, PGF, PRRX1, PRRX2, EDNRA, ARHGAP22, S1PR1, CD44, CTGF, CCBE1, NOS3, LOX, NR2F2, CYR61, RECK, MYH9, ARHGAP24, MMP14, JUNB, PNPLA6, ANXA2P3, ANXA2P2, BGN, HIF1A, COL1A2, FOXC2, COL1A1, TNFAIP2, ACVR1, ZFAND5, TNFRSF12A, TIPARP, CDH2, ELK3, TCF7L2, ZFP36L1, HAND2, ITGAV, ZC3H12A, HS6ST1, PLCD1, THBS1, PPAP2B, C1GALT1, PLAT, B4GALT1, TGFBR1, MYO1E, ITGA4, ANXA2, CDH13, PKNOX1, MEOX2…	1149	138	4909	1.79565	0.00578516	0.000527312	0.00296387
GOTERM_BP_FAT	GO:0001568~blood vessel development	57	3.75989	2.24057e-06	NRP2, RTN4, NRP1, PGF, PRRX1, PRRX2, EDNRA, ARHGAP22, S1PR1, CD44, CTGF, CCBE1, NOS3, LOX, NR2F2, CYR61, RECK, MYH9, ARHGAP24, MMP14, JUNB, PNPLA6, ANXA2P3, ANXA2P2, BGN, HIF1A, COL1A2, FOXC2, COL1A1, TNFAIP2, ACVR1, TNFRSF12A, TIPARP, ELK3, CDH2, TCF7L2, ZFP36L1, HAND2, ITGAV, ZC3H12A, HS6ST1, PLCD1, THBS1, PPAP2B, C1GALT1, PLAT, B4GALT1, TGFBR1, MYO1E, ITGA4, ANXA2, CDH13, PKNOX1, MEOX2, ID1, J…	1149	136	4909	1.79064	0.00802473	0.0006712	0.00411586
GOTERM_BP_FAT	GO:0048514~blood vessel morphogenesis	48	3.16623	2.42946e-05	RTN4, NRP2, NRP1, PGF, PRRX1, PRRX2, EDNRA, ARHGAP22, S1PR1, CTGF, CCBE1, NOS3, NR2F2, CYR61, MYH9, ARHGAP24, MMP14, ANXA2P3, PNPLA6, JUNB, ANXA2P2, HIF1A, BGN, FOXC2, TNFAIP2, ACVR1, TNFRSF12A, TIPARP, ELK3, CDH2, ZFP36L1, HAND2, ZC3H12A, HS6ST1, PLCD1, THBS1, C1GALT1, PLAT, B4GALT1, MYO1E, TGFBR1, ITGA4, ANXA2, CDH13, PKNOX1, MEOX2, ID1, ENG, PLAU	1149	116	4909	1.76789	0.083657	0.00580737	0.0446199
GOTERM_BP_FAT	GO:0001525~angiogenesis	36	2.37467	5.53289e-05	NRP2, RTN4, NRP1, TNFRSF12A, PGF, ELK3, EDNRA, ARHGAP22, S1PR1, CTGF, HAND2, CCBE1, ZC3H12A, NOS3, PLCD1, HS6ST1, THBS1, C1GALT1, CYR61, B4GALT1, MYH9, MMP14, ARHGAP24, ANXA2P3, PNPLA6, ANXA2, ANXA2P2, CDH13, PKNOX1, HIF1A, MEOX2, ID1, FOXC2, ENG, TNFAIP2, PLAU, ACVR1	1149	81	4909	1.89885	0.180424	0.0116358	0.101591
Annotation Cluster 9	Enrichment Score: 4.797841885037275
Category	Term	Count	%	PValue	Genes	List Total	Pop Hits	Pop Total	Fold Enrichment	Bonferroni	Benjamini	FDR
GOTERM_CC_FAT	GO:0016323~basolateral plasma membrane	45	2.96834	9.89133e-07	TLN1, ENAH, ATP1B1, LIMS2, ERBB2, BCAR1, FHL2, ITGB1, PXN, VCL, ACTR3, SORBS3, DNAJC15, CD44, ANK2, ILK, ZYX, MSN, ADAM9, TES, B4GALT1, DIXDC1, STX2, SLC12A2, LIMK1, LPP, TGFBR1, MET, ANXA1, ACTN1, FBLIM1, ATP1A1, NEXN, ARHGAP24, VASP, ARHGAP31, TJP1, SDC1, ERBB2IP, ITGA5, LAYN, SH3KBP1, DSP, TGFB1I1, DST	1059	98	4615	2.00107	0.000534978	5.35107e-05	0.00144016
GOTERM_CC_FAT	GO:0005912~adherens junction	40	2.63852	1.4593e-06	TLN1, ENAH, LIMS2, SHROOM3, BCAR1, FHL2, LMO7, ABI2, CDH2, ITGB1, PXN, VCL, SORBS3, DNAJC15, CD44, ILK, SSX2IP, ZYX, NPHP1, TES, APC, DIXDC1, TMEM204, LIMK1, LPP, FBLIM1, ACTN1, MYH9, NEXN, ARHGAP24, CTNNA1, VASP, ARHGAP31, TJP1, SDC1, ITGA5, LAYN, SH3KBP1, DSP, TGFB1I1	1059	84	4615	2.07518	0.000789168	7.17683e-05	0.0021247
GOTERM_CC_FAT	GO:0070161~anchoring junction	41	2.70449	2.10106e-06	TLN1, ENAH, LIMS2, SHROOM3, BCAR1, FHL2, LMO7, ABI2, CDH2, ITGB1, PXN, VCL, SORBS3, DNAJC15, CD44, ILK, SSX2IP, ZYX, NPHP1, TES, APC, B4GALT1, DIXDC1, TMEM204, LIMK1, LPP, FBLIM1, ACTN1, MYH9, NEXN, ARHGAP24, CTNNA1, VASP, ARHGAP31, TJP1, SDC1, ITGA5, LAYN, SH3KBP1, DSP, TGFB1I1	1059	88	4615	2.03038	0.00113603	8.74326e-05	0.00305908
GOTERM_CC_FAT	GO:0030055~cell-substrate junction	31	2.04485	2.33309e-06	TLN1, ENAH, LIMS2, BCAR1, FHL2, ITGB1, PXN, VCL, ACTR3, DNAJC15, SORBS3, CD44, ILK, ZYX, TES, DIXDC1, LIMK1, LPP, FBLIM1, ACTN1, ARHGAP24, NEXN, VASP, ARHGAP31, SDC1, ERBB2IP, ITGA5, LAYN, SH3KBP1, TGFB1I1, DST	1059	59	4615	2.28974	0.00126141	9.01532e-05	0.00339691
GOTERM_CC_FAT	GO:0005924~cell-substrate adherens junction	28	1.84697	1.7323e-05	TLN1, ENAH, LIMS2, BCAR1, FHL2, ITGB1, PXN, VCL, DNAJC15, SORBS3, CD44, ILK, ZYX, TES, DIXDC1, LIMK1, LPP, FBLIM1, ACTN1, ARHGAP24, NEXN, VASP, ARHGAP31, SDC1, ITGA5, LAYN, SH3KBP1, TGFB1I1	1059	55	4615	2.21856	0.00932803	0.000585567	0.0252192
GOTERM_CC_FAT	GO:0005925~focal adhesion	27	1.781	2.51833e-05	TLN1, ENAH, LIMS2, BCAR1, FHL2, ITGB1, PXN, VCL, SORBS3, DNAJC15, CD44, ILK, ZYX, TES, DIXDC1, LPP, LIMK1, FBLIM1, ACTN1, ARHGAP24, VASP, ARHGAP31, SDC1, ITGA5, LAYN, SH3KBP1, TGFB1I1	1059	53	4615	2.22005	0.013532	0.000801112	0.0366605
GOTERM_CC_FAT	GO:0030054~cell junction	63	4.15567	0.000107651	ENAH, TLN1, BCAR1, STRN, LMO7, AMOTL2, VCL, ARHGAP21, ACTR3, DNAJC15, CD44, ILK, ZYX, DPP4, TMEM204, MAGI1, LIMK1, MPP5, PSD3, FBLIM1, ACTN1, MYH9, NEXN, CTNNA1, ARHGAP24, VASP, ARHGAP31, SDC1, STXBP5, SH3KBP1, DSP, TGFB1I1, ADD3, DST, FAIM2, SHROOM3, LIMS2, PANX1, ABI2, FHL2, ABI1, CLDN11, CDH2, ITGB1, PXN, PRR7, SORBS3, CNN2, SSX2IP, NPHP1, IFT140, APC, TES, B4GALT1, DIXDC1, LPP, COL13A1, SYT11…	1059	176	4615	1.55992	0.0565785	0.00290787	0.156624
SP_PIR_KEYWORDS	cell junction	39	2.57256	0.0124665	ENAH, LIMS2, SHROOM3, PANX1, BCAR1, ABI1, CLDN11, PXN, VCL, PRR7, ARHGAP21, SORBS3, ILK, SSX2IP, ZYX, DPP4, NPHP1, TES, APC, DIXDC1, TMEM204, MAGI1, LPP, SYT11, CNKSR3, PSD3, MPP5, FBLIM1, NEXN, ARHGAP24, CTNNA1, VASP, ARHGAP31, TJP1, ERBB2IP, STXBP5, SH3KBP1, DSP, TGFB1I1, FAIM2	1436	120	6373	1.44236	0.999543	0.163758	16.9578
Annotation Cluster 10	Enrichment Score: 4.674217606112945
Category	Term	Count	%	PValue	Genes	List Total	Pop Hits	Pop Total	Fold Enrichment	Bonferroni	Benjamini	FDR
INTERPRO	IPR001781:Zinc finger, LIM-type	25	1.64908	3.01977e-06	LIMS2, PDLIM7, FHL1, PDLIM5, FHL3, LMO7, FHL2, PXN, LPXN, LIMD2, MICAL1, ZYX, TES, CRIP1, CRIP2, LPP, LIMK1, MICAL2, ZBTB41, LMCD1, FBLIM1, CSRP1, CSRP2, LIMCH1, TGFB1I1	1342	43	5842	2.53093	0.00530671	0.0010636	0.005115
SP_PIR_KEYWORDS	LIM domain	24	1.58311	5.34889e-06	CRIP1, LIMS2, PDLIM7, LIMK1, LPP, CRIP2, MICAL2, PDLIM5, FHL1, LMCD1, FHL3, FHL2, LMO7, FBLIM1, CSRP1, CSRP2, PXN, LPXN, LIMCH1, LIMD2, MICAL1, ZYX, TGFB1I1, TES	1436	42	6373	2.53601	0.00327351	0.000218568	0.00792278
UP_SEQ_FEATURE	domain:LIM zinc-binding 1	18	1.18734	1.47846e-05	LIMS2, PDLIM7, LIMK1, LPP, CRIP2, PDLIM5, FHL1, LMCD1, FHL3, FHL2, FBLIM1, CSRP1, CSRP2, PXN, LPXN, ZYX, TGFB1I1, TES	1436	28	6370	2.85167	0.0552755	0.00708254	0.027355
UP_SEQ_FEATURE	domain:LIM zinc-binding 2	18	1.18734	1.47846e-05	LIMS2, PDLIM7, LIMK1, LPP, CRIP2, PDLIM5, FHL1, LMCD1, FHL3, FHL2, FBLIM1, CSRP1, CSRP2, PXN, LPXN, ZYX, TGFB1I1, TES	1436	28	6370	2.85167	0.0552755	0.00708254	0.027355
SMART	SM00132:LIM	25	1.64908	7.74131e-05	LIMS2, PDLIM7, FHL1, PDLIM5, FHL3, LMO7, FHL2, PXN, LPXN, LIMD2, MICAL1, ZYX, TES, CRIP1, CRIP2, LPP, LIMK1, MICAL2, ZBTB41, LMCD1, FBLIM1, CSRP1, CSRP2, LIMCH1, TGFB1I1	863	43	3133	2.11067	0.0256764	0.0129217	0.105182
UP_SEQ_FEATURE	domain:LIM zinc-binding 3	13	0.85752	0.000329628	LPXN, LIMS2, PDLIM7, LPP, FHL1, PDLIM5, FHL3, FHL2, FBLIM1, TGFB1I1, ZYX, PXN, TES	1436	20	6370	2.88336	0.718595	0.119087	0.608213
Annotation Cluster 11	Enrichment Score: 4.009561055451603
Category	Term	Count	%	PValue	Genes	List Total	Pop Hits	Pop Total	Fold Enrichment	Bonferroni	Benjamini	FDR
GOTERM_BP_FAT	GO:0009611~response to wounding	73	4.8153	8.38339e-07	PPARD, NRP1, FGF7, MASP1, NDST1, SGMS1, TGFB1, FOS, HMCN1, CD44, CTGF, GSN, SERPINE1, LOX, NRG1, TFPI2, NFKBIZ, PLAUR, TNFAIP6, SDC1, THBD, HIF1A, IL20RB, ADM, F3, PDGFRA, DSP, NFE2L1, VCAN, CTSB, NGF, ACVR1, DCBLD2, CXCL1, YWHAZ, CCL2, C9, NMI, ERBB2, TNC, CLU, BDKRB1, ELK3, BDKRB2, CXCL6, GPR68, TIMP3, TPM1, CD9, PROCR, SCN9A, NFATC4, THBS1, PTX3, FN1, PLAT, B4GALT1, KLF6, IL6, SAAL1, EFEMP2, M…	1149	184	4909	1.69503	0.00301013	0.000301421	0.00154002
GOTERM_BP_FAT	GO:0006952~defense response	59	3.89182	0.000161055	MASP1, NDST1, SGMS1, TGFB1, TAPBP, FOS, TMEM173, CD44, HIST1H2BI, DDAH2, FOSL1, NFKBIZ, SOCS6, COLEC12, CLIC1, NLRP1, INHBA, TNFAIP6, HIF1A, IL20RB, F3, NFE2L1, ACVR1, NGF, CXCL1, YWHAZ, IL1R1, CCL2, C9, NMI, CLU, BDKRB1, IL32, BDKRB2, CXCL6, GPR68, ITGB1, CD74, SCN9A, BCL3, NFATC4, PTX3, THBS1, FN1, TCIRG1, B4GALT1, IL6, HIST1H2BC, HIST1H2BE, HIST1H2BF, SAAL1, HIST1H2BG, ANXA1, MALT1, COTL1, VDA…	1149	161	4909	1.56567	0.439654	0.0248682	0.295446
GOTERM_BP_FAT	GO:0006954~inflammatory response	35	2.30871	0.00693301	CXCL1, YWHAZ, NMI, C9, CCL2, NDST1, MASP1, CLU, BDKRB1, CXCL6, BDKRB2, GPR68, SGMS1, TGFB1, FOS, CD44, SCN9A, NFATC4, PTX3, THBS1, FN1, B4GALT1, NFKBIZ, IL6, SAAL1, ANXA1, TNFAIP6, HIF1A, NUPR1, IL20RB, F3, NFE2L1, ACVR1, NGF, F2R	1149	98	4909	1.52586	1	0.315495	11.9974
Annotation Cluster 12	Enrichment Score: 3.96569705975683
Category	Term	Count	%	PValue	Genes	List Total	Pop Hits	Pop Total	Fold Enrichment	Bonferroni	Benjamini	FDR
GOTERM_CC_FAT	GO:0044459~plasma membrane part	222	14.6438	4.78797e-07	ATP1B1, ADCY7, STRN, LPAR1, AMOTL2, SHKBP1, ATP2B1, DIRAS1, S1PR1, CD44, ILK, RAB23, FAS, GNG5, ADAM9, EFNB3, MAGI1, CTNNA1, MYH9, PTRF, HAS1, F3, PDGFRA, HLA-DPA1, TGFB1I1, ADD3, ADD2, HS3ST3B1, DCBLD2, IL1R1, ENPP2, ERBB2, ITGA11, MME, BDKRB1, BDKRB2, PXN, CD74, ITGBL1, ALCAM, PROCR, SLC31A2, NPHP1, TGFBR1, CNKSR3, KCNK2, SYNE1, ATP2A2, EPS8, CDC42BPA, ENG, BCAR1, TRPV2, CD151, FLT3LG, ACTR3, E…	1059	733	4615	1.31985	0.000258996	2.87806e-05	0.000697122
GOTERM_CC_FAT	GO:0031226~intrinsic to plasma membrane	103	6.7942	0.00104297	ATP1B1, ADCY7, TSPAN4, SLC7A8, LPAR1, ATP2B1, SHKBP1, PTGIR, CD44, ADAM9, EFNB3, MYH9, THBD, HAS1, F3, PDGFRA, HLA-DPA1, HS3ST3B1, DCBLD2, IL1R1, ENPP2, ITGA11, BMPR2, PTK7, MME, BDKRB1, BDKRB2, ITGB1, ITGBL1, PROCR, ITGAV, TRO, SCN9A, SLC31A2, MUC1, PODXL, SYT11, TGFBR1, MET, ITGA1, KCTD3, ITGA4, TPBG, KCNK2, ANKH, CYB561, ATP2A2, EPS8, ITGA5, SLC7A1, TBXA2R, ENG, KCTD14, TRPV2, CD151, DDR2, FLT…	1059	340	4615	1.32018	0.431379	0.0199603	1.50786
GOTERM_CC_FAT	GO:0005887~integral to plasma membrane	98	6.46438	0.00253797	ATP1B1, ADCY7, TSPAN4, SLC7A8, LPAR1, ATP2B1, SHKBP1, PTGIR, CD44, EFNB3, MYH9, THBD, HAS1, PDGFRA, HLA-DPA1, HS3ST3B1, DCBLD2, IL1R1, ENPP2, ITGA11, BMPR2, PTK7, MME, BDKRB1, BDKRB2, ITGB1, ITGBL1, PROCR, ITGAV, TRO, SCN9A, SLC31A2, MUC1, TGFBR1, SYT11, PODXL, MET, ITGA1, KCTD3, ITGA4, KCNK2, TPBG, ANKH, CYB561, EPS8, ATP2A2, ITGA5, SLC7A1, TBXA2R, KCTD14, ENG, TRPV2, CD151, DDR2, EDNRA, SLC1A4,…	1059	329	4615	1.29809	0.747107	0.0420523	3.63235
Annotation Cluster 13	Enrichment Score: 3.8838909369958916
Category	Term	Count	%	PValue	Genes	List Total	Pop Hits	Pop Total	Fold Enrichment	Bonferroni	Benjamini	FDR
INTERPRO	IPR011993:Pleckstrin homology-type	58	3.82586	9.01285e-07	ENAH, TLN1, ARHGAP21, ARHGAP22, VEPH1, DAB2, FRMD6, TIAM1, SPRED2, SHC1, SPRED1, MSN, DOCK10, AKT3, NET1, PSD3, ARHGEF12, ARHGAP24, VASP, FARP1, FARP2, PRKD1, EPB41L2, PRKD2, EPB41L1, DOK4, DOK5, FRMD4A, OSBPL10, PHLDB1, RALGPS2, ASAP2, AKAP13, ASAP1, ANLN, CYTH3, PLEKHG4, EZR, PLCD1, RASA3, RASA4, FGD4, TBC1D2, OSBPL3, OSBPL8, SWAP70, OSBPL6, PTPN14, PTPN13, TRIO, RAPH1, MYO10, EPS8, SPTBN1, FAM…	1342	138	5842	1.82961	0.0015868	0.000396937	0.00152666
INTERPRO	IPR001849:Pleckstrin homology	50	3.29815	1.01141e-05	PHLDB1, RALGPS2, ASAP2, ASAP1, AKAP13, ANLN, CYTH3, ARHGAP21, PLEKHG4, RASAL2, ARHGAP22, VEPH1, TIAM1, SH2B3, PLCD1, FAM129B, DOCK10, RASA3, RASA4, AKT3, NET1, PHLDA1, FGD4, TBC1D2, OSBPL3, ABR, ROCK1, OSBPL8, SWAP70, OSBPL6, PSD3, TRIO, ARHGEF12, VAV2, ARHGAP24, ECT2, RAPH1, FARP1, FARP2, PRKD1, PRKD2, MYO10, DOK4, DOK5, CDC42BPA, SPTBN1, OSBPL10, PHLDB2, ARAP1, DNM1	1342	121	5842	1.79884	0.0176632	0.00296577	0.0171306
UP_SEQ_FEATURE	domain:PH	43	2.83641	5.01585e-05	PHLDB1, RALGPS2, ASAP2, ASAP1, AKAP13, ANLN, CYTH3, ARHGAP21, RASAL2, PLEKHG4, ARHGAP22, VEPH1, SH2B3, PLCD1, FAM129B, DOCK10, RASA3, RASA4, AKT3, NET1, TBC1D2, PHLDA1, OSBPL3, ABR, OSBPL8, ROCK1, SWAP70, OSBPL6, PSD3, ARHGEF12, ARHGAP24, VAV2, ECT2, RAPH1, PRKD1, PRKD2, DOK4, DOK5, CDC42BPA, SPTBN1, OSBPL10, PHLDB2, DNM1	1436	106	6370	1.79948	0.175447	0.0212068	0.0927763
SMART	SM00233:PH	50	3.29815	0.00111839	PHLDB1, RALGPS2, ASAP2, ASAP1, AKAP13, ANLN, CYTH3, ARHGAP21, PLEKHG4, RASAL2, ARHGAP22, VEPH1, TIAM1, SH2B3, PLCD1, FAM129B, DOCK10, RASA3, RASA4, AKT3, NET1, PHLDA1, FGD4, TBC1D2, OSBPL3, ABR, ROCK1, OSBPL8, SWAP70, OSBPL6, PSD3, TRIO, ARHGEF12, VAV2, ARHGAP24, ECT2, RAPH1, FARP1, FARP2, PRKD1, PRKD2, MYO10, DOK4, DOK5, CDC42BPA, SPTBN1, OSBPL10, PHLDB2, ARAP1, DNM1	863	121	3133	1.50015	0.313391	0.0724402	1.50966
GOTERM_MF_FAT	GO:0030695~GTPase regulator activity	55	3.62797	0.00216624	MLPH, TBC1D19, IQGAP1, ARL2BP, RGL2, ARHGAP21, ARHGAP22, TBC1D17, TIAM1, DOCK10, NET1, RALBP1, MADD, PSD3, ARHGAP24, ARHGEF12, ECT2, ANXA2P3, ARHGEF10, FARP1, ANXA2P2, RIC8A, FARP2, ARHGAP31, MAP4K5, SIPA1L1, RIN2, RIN1, SRGAP1, RIN3, RALGPS2, ASAP2, AKAP13, ASAP1, CYTH3, ARFGEF1, RASAL2, PLEKHG4, DOCK1, RASA3, RASA4, FGD4, TBC1D2, GDI1, ABR, TRIO, DOCK5, VAV2, RACGAP1, ANXA2, RABEP2, RGS3, RGS4,…	1081	163	4649	1.45114	0.897633	0.125471	3.38927
GOTERM_MF_FAT	GO:0060589~nucleoside-triphosphatase regulator activity	55	3.62797	0.00448974	MLPH, TBC1D19, IQGAP1, ARL2BP, RGL2, ARHGAP21, ARHGAP22, TBC1D17, TIAM1, DOCK10, NET1, RALBP1, MADD, PSD3, ARHGAP24, ARHGEF12, ECT2, ANXA2P3, ARHGEF10, FARP1, ANXA2P2, RIC8A, FARP2, ARHGAP31, MAP4K5, SIPA1L1, RIN2, RIN1, SRGAP1, RIN3, RALGPS2, ASAP2, AKAP13, ASAP1, CYTH3, ARFGEF1, RASAL2, PLEKHG4, DOCK1, RASA3, RASA4, FGD4, TBC1D2, GDI1, ABR, TRIO, DOCK5, VAV2, RACGAP1, ANXA2, RABEP2, RGS3, RGS4,…	1081	168	4649	1.40795	0.991168	0.220352	6.90475
Annotation Cluster 14	Enrichment Score: 3.534764529808839
Category	Term	Count	%	PValue	Genes	List Total	Pop Hits	Pop Total	Fold Enrichment	Bonferroni	Benjamini	FDR
SP_PIR_KEYWORDS	egf-like domain	41	2.70449	8.48583e-09	PEAR1, LTBP1, C9, LTBP2, MASP1, SUSD1, TNC, PAMR1, EDIL3, ITGBL1, HMCN1, COMP, CCBE1, ACAN, HEG1, ELTD1, AGRN, HHIP, FBN2, THBS1, NRG1, THBS2, THBS3, VASN, PLAT, TNXB, SCUBE3, EFEMP2, FBN1, EFEMP1, NID2, SLIT3, THBD, TMEM8B, SNED1, FBLN5, VCAN, ADAM19, ADAM12, PLAU, LRP4	1436	76	6373	2.3942	5.2018e-06	5.77979e-07	1.25697e-05
INTERPRO	IPR000742:EGF-like, type 3	38	2.5066	2.7028e-08	PEAR1, LTBP1, LTBP2, SUSD1, TNC, PAMR1, EDIL3, HMCN1, COMP, CCBE1, ACAN, HEG1, ELTD1, AGRN, HHIP, FBN2, THBS1, NRG1, THBS2, THBS3, ADAM9, PLAT, VASN, TNXB, SCUBE3, EFEMP2, FBN1, EFEMP1, NTNG1, NID2, SLIT3, THBD, SNED1, FBLN5, VCAN, ADAM19, ADAM12, PLAU	1342	69	5842	2.39742	4.76223e-05	4.76223e-05	4.57822e-05
INTERPRO	IPR013032:EGF-like region, conserved site	46	3.0343	1.20802e-07	PEAR1, LTBP1, C9, LTBP2, MASP1, SUSD1, TNC, PAMR1, EDIL3, ITGB1, ITGBL1, HMCN1, COMP, CCBE1, ACAN, HEG1, ELTD1, AGRN, HHIP, FBN2, THBS1, NRG1, THBS2, THBS3, FN1, ADAM9, VASN, PLAT, TNXB, SCUBE3, EFEMP2, FBN1, EFEMP1, NTNG1, NID2, SLIT3, THBD, TMEM8B, SNED1, FBLN5, VCAN, LAMC1, ADAM19, ADAM12, PLAU, LRP4	1342	95	5842	2.10787	0.000212831	0.000106421	0.000204625
INTERPRO	IPR006210:EGF-like	36	2.37467	3.90944e-07	PEAR1, LTBP1, LTBP2, SUSD1, TNC, PAMR1, EDIL3, ITGBL1, HMCN1, COMP, CCBE1, ACAN, ELTD1, AGRN, FBN2, HHIP, THBS1, NRG1, THBS2, THBS3, ADAM9, PLAT, VASN, TNXB, SCUBE3, EFEMP2, FBN1, NTNG1, NID2, SLIT3, THBD, TMEM8B, SNED1, VCAN, PLAU, LRP4	1342	69	5842	2.27124	0.000688605	0.000229588	0.000662209
SMART	SM00181:EGF	36	2.37467	3.00432e-05	PEAR1, LTBP1, LTBP2, SUSD1, TNC, PAMR1, EDIL3, ITGBL1, HMCN1, COMP, CCBE1, ACAN, ELTD1, AGRN, FBN2, HHIP, THBS1, NRG1, THBS2, THBS3, ADAM9, PLAT, VASN, TNXB, SCUBE3, EFEMP2, FBN1, NTNG1, NID2, SLIT3, THBD, TMEM8B, SNED1, VCAN, PLAU, LRP4	863	69	3133	1.8941	0.0100439	0.0100439	0.0408322
INTERPRO	IPR018097:EGF-like calcium-binding, conserved site	22	1.45119	0.000777325	LTBP1, MASP1, LTBP2, SCUBE3, SUSD1, EFEMP2, FBN1, EFEMP1, EDIL3, NID2, SLIT3, THBD, HMCN1, SNED1, COMP, FBLN5, CCBE1, HEG1, ELTD1, VCAN, THBS3, LRP4	1342	47	5842	2.03767	0.745939	0.100034	1.30857
INTERPRO	IPR001881:EGF-like calcium-binding	22	1.45119	0.000777325	LTBP1, MASP1, LTBP2, SCUBE3, SUSD1, EFEMP2, FBN1, EFEMP1, EDIL3, NID2, SLIT3, THBD, HMCN1, SNED1, COMP, FBLN5, CCBE1, HEG1, ELTD1, VCAN, THBS3, LRP4	1342	47	5842	2.03767	0.745939	0.100034	1.30857
UP_SEQ_FEATURE	domain:EGF-like 1	20	1.31926	0.00089788	PEAR1, LTBP1, LTBP2, SUSD1, FBN1, EDIL3, NID2, SLIT3, THBD, SNED1, COMP, HEG1, ELTD1, VCAN, AGRN, FBN2, HHIP, THBS1, THBS2, THBS3	1436	42	6370	2.11235	0.968406	0.250163	1.64851
INTERPRO	IPR006209:EGF	21	1.38522	0.00213844	PLAT, VASN, LTBP1, LTBP2, SCUBE3, TNC, FBN1, PAMR1, EDIL3, NID2, SLIT3, THBD, SNED1, ACAN, HEG1, VCAN, AGRN, NRG1, THBS1, THBS2, LRP4	1342	47	5842	1.94505	0.976993	0.18006	3.56118
INTERPRO	IPR013091:EGF calcium-binding	18	1.18734	0.00238255	LTBP1, LTBP2, SCUBE3, EFEMP2, SUSD1, FBN1, EFEMP1, NID2, HMCN1, THBD, COMP, FBLN5, CCBE1, HEG1, ELTD1, THBS2, THBS3, LRP4	1342	38	5842	2.06204	0.98505	0.18954	3.96002
UP_SEQ_FEATURE	domain:EGF-like 3; calcium-binding	12	0.791557	0.00266542	LTBP1, HMCN1, THBD, LTBP2, SCUBE3, SUSD1, FBLN5, COMP, EFEMP2, EFEMP1, NID2, THBS3	1436	21	6370	2.53482	0.999965	0.417402	4.81891
INTERPRO	IPR000152:EGF-type aspartate/asparagine hydroxylation conserved site	19	1.2533	0.00434565	LTBP1, MASP1, LTBP2, SCUBE3, SUSD1, EFEMP2, FBN1, EFEMP1, EDIL3, NID2, THBD, HMCN1, SNED1, FBLN5, CCBE1, HEG1, ELTD1, VCAN, LRP4	1342	43	5842	1.92351	0.999535	0.247393	7.11152
UP_SEQ_FEATURE	domain:EGF-like 2	14	0.923483	0.00436727	LTBP1, TNXB, PEAR1, LTBP2, TNC, FBN1, EDIL3, NID2, SLIT3, THBD, SNED1, AGRN, FBN2, HHIP	1436	28	6370	2.21797	1	0.489993	7.77991
UP_SEQ_FEATURE	domain:EGF-like 2; calcium-binding	14	0.923483	0.00436727	SCUBE3, EFEMP2, SUSD1, EFEMP1, HMCN1, FBLN5, COMP, HEG1, ELTD1, VCAN, THBS1, THBS2, THBS3, LRP4	1436	28	6370	2.21797	1	0.489993	7.77991
SMART	SM00179:EGF_CA	22	1.45119	0.00819567	LTBP1, MASP1, LTBP2, SCUBE3, SUSD1, EFEMP2, FBN1, EFEMP1, EDIL3, NID2, SLIT3, THBD, HMCN1, SNED1, COMP, FBLN5, CCBE1, HEG1, ELTD1, VCAN, THBS3, LRP4	863	47	3133	1.69932	0.93703	0.29223	10.5839
UP_SEQ_FEATURE	domain:EGF-like 5; calcium-binding	9	0.593668	0.0321052	LTBP1, HMCN1, LTBP2, FBLN5, EFEMP2, FBN1, EFEMP1, NID2, FBN2	1436	18	6370	2.21797	1	0.880824	45.3294
UP_SEQ_FEATURE	domain:EGF-like 6; calcium-binding	7	0.461741	0.0511282	LTBP1, HMCN1, THBD, LTBP2, FBLN5, EFEMP2, EFEMP1	1436	13	6370	2.38858	1	0.948609	62.1356
UP_SEQ_FEATURE	domain:EGF-like 4; calcium-binding	8	0.527704	0.0885468	LTBP1, HMCN1, SNED1, FBLN5, EFEMP2, FBN1, EFEMP1, FBN2	1436	18	6370	1.97153	1	0.989658	82.0157
Annotation Cluster 15	Enrichment Score: 3.3190701939329053
Category	Term	Count	%	PValue	Genes	List Total	Pop Hits	Pop Total	Fold Enrichment	Bonferroni	Benjamini	FDR
GOTERM_CC_FAT	GO:0043292~contractile fiber	23	1.51715	0.000112849	CRYAB, ACTA2, PDLIM5, SYNC, FHL3, FHL2, ACTN1, FLNC, TPM2, TPM1, FLNB, TPM4, MYL9, TPM3, VCL, KRT19, SYNE1, DES, ANK2, SORBS2, ILK, SPTBN1, PLEC	1059	45	4615	2.22736	0.0592283	0.00290315	0.164182
GOTERM_CC_FAT	GO:0044449~contractile fiber part	22	1.45119	0.000164373	CRYAB, ACTA2, PDLIM5, SYNC, FHL3, FHL2, ACTN1, FLNC, TPM2, TPM1, FLNB, TPM4, MYL9, TPM3, VCL, KRT19, SYNE1, DES, ANK2, SORBS2, ILK, SPTBN1	1059	43	4615	2.22962	0.0850932	0.00403425	0.239059
GOTERM_CC_FAT	GO:0030017~sarcomere	18	1.18734	0.000307634	CRYAB, PDLIM5, SYNC, FHL3, FHL2, ACTN1, FLNC, TPM2, TPM1, FLNB, TPM4, TPM3, KRT19, SYNE1, DES, ANK2, SORBS2, SPTBN1	1059	33	4615	2.37703	0.15334	0.00721108	0.44698
GOTERM_CC_FAT	GO:0030016~myofibril	20	1.31926	0.000524511	CRYAB, PDLIM5, SYNC, FHL3, FHL2, ACTN1, FLNC, TPM2, TPM1, FLNB, TPM4, VCL, TPM3, KRT19, SYNE1, DES, ANK2, SORBS2, ILK, SPTBN1	1059	40	4615	2.17894	0.247109	0.0117568	0.760975
GOTERM_CC_FAT	GO:0030018~Z disc	11	0.725594	0.00150692	KRT19, DES, CRYAB, SORBS2, PDLIM5, SYNC, FHL3, FHL2, ACTN1, FLNC, FLNB	1059	17	4615	2.81981	0.55774	0.0277409	2.17178
GOTERM_CC_FAT	GO:0031674~I band	11	0.725594	0.00270005	KRT19, DES, CRYAB, SORBS2, PDLIM5, SYNC, FHL3, FHL2, ACTN1, FLNC, FLNB	1059	18	4615	2.66315	0.768391	0.0421084	3.86009
Annotation Cluster 16	Enrichment Score: 3.176584273442873
Category	Term	Count	%	PValue	Genes	List Total	Pop Hits	Pop Total	Fold Enrichment	Bonferroni	Benjamini	FDR
GOTERM_BP_FAT	GO:0051301~cell division	57	3.75989	5.51649e-05	KIF23, KIFC1, MAD1L1, PRC1, BCAR1, KNTC1, PTTG1, CD2AP, DSTN, CCNA2, CDCA3, STAG1, CDK1, STX2, ROCK1, DSN1, LIG1, LIG3, NUSAP1, CDK7, MYH9, HMGA2, UBE2C, TACC1, MCM5, CDK2, NCAPD2, FMN2, PPP1CA, CCND1, MAD2L1, ZWINT, CFL1, PELO, SEPT6, SEPT9, ANAPC13, NEK1, ANLN, CEP55, SPC24, NCAPH, NCAPG, APC, CENPF, BIRC5, CDC20, RACGAP1, SMC2, CENPH, CDC25B, CCNB1, CCNB2, PLK1, ANXA11, SETD8, MYH10	1149	149	4909	1.63441	0.179941	0.0123221	0.10129
GOTERM_BP_FAT	GO:0000087~M phase of mitotic cell cycle	47	3.10026	0.000116504	KIF23, MAD1L1, KIF22, KIFC1, ANAPC13, NEK1, KNTC1, ANLN, AURKA, PTTG1, CEP55, CD2AP, SPC24, NCAPH, NCAPG, CCNA2, TUBB3, APC, CDCA3, STAG1, CDK1, DSN1, DLGAP5, TPX2, KIF18A, CENPF, NUSAP1, CDC20, BIRC5, PBK, HMGA2, SUGT1, UBE2C, SMC2, DCTN1, CDK2, NCAPD2, EML4, CDC25B, CCNB1, MPHOSPH9, MAD2L1, CCNB2, PLK1, ZWINT, SETD8, DSCC1	1149	119	4909	1.68742	0.342278	0.0197534	0.213802
GOTERM_BP_FAT	GO:0007067~mitosis	46	3.0343	0.000125018	KIF23, MAD1L1, KIF22, KIFC1, ANAPC13, NEK1, KNTC1, ANLN, AURKA, PTTG1, CEP55, CD2AP, SPC24, NCAPH, NCAPG, CCNA2, TUBB3, APC, CDCA3, STAG1, CDK1, DSN1, DLGAP5, TPX2, KIF18A, CENPF, NUSAP1, CDC20, BIRC5, PBK, HMGA2, SUGT1, UBE2C, SMC2, CDK2, DCTN1, NCAPD2, EML4, CDC25B, CCNB1, MAD2L1, CCNB2, PLK1, ZWINT, SETD8, DSCC1	1149	116	4909	1.69423	0.362111	0.0202286	0.229409
GOTERM_BP_FAT	GO:0000280~nuclear division	46	3.0343	0.000125018	KIF23, MAD1L1, KIF22, KIFC1, ANAPC13, NEK1, KNTC1, ANLN, AURKA, PTTG1, CEP55, CD2AP, SPC24, NCAPH, NCAPG, CCNA2, TUBB3, APC, CDCA3, STAG1, CDK1, DSN1, DLGAP5, TPX2, KIF18A, CENPF, NUSAP1, CDC20, BIRC5, PBK, HMGA2, SUGT1, UBE2C, SMC2, CDK2, DCTN1, NCAPD2, EML4, CDC25B, CCNB1, MAD2L1, CCNB2, PLK1, ZWINT, SETD8, DSCC1	1149	116	4909	1.69423	0.362111	0.0202286	0.229409
SP_PIR_KEYWORDS	cell division	49	3.23219	0.000150305	KIF23, MAD1L1, KIFC1, PRC1, ANAPC13, NEK1, KNTC1, ANLN, CEP55, PTTG1, CD2AP, SPC24, NCAPH, NCAPG, CCNA2, CDCA3, STAG1, CSNK1A1, CDK1, DSN1, LIG1, LIG3, NUSAP1, CASC5, CENPF, CDC20, BIRC5, CDK7, HMGA2, RACGAP1, UBE2C, SMC2, CDK2, TACC1, MCM5, NCAPD2, CDC25B, CCNB1, CCND1, PPP1CA, CCNB2, MAD2L1, PLK1, ZWINT, ANXA11, PELO, SETD8, SEPT6, SEPT9	1436	131	6373	1.66002	0.0880258	0.00483792	0.222409
GOTERM_BP_FAT	GO:0048285~organelle fission	46	3.0343	0.000385241	KIF23, MAD1L1, KIF22, KIFC1, ANAPC13, NEK1, KNTC1, ANLN, AURKA, PTTG1, CEP55, CD2AP, SPC24, NCAPH, NCAPG, CCNA2, TUBB3, APC, CDCA3, STAG1, CDK1, DSN1, DLGAP5, TPX2, KIF18A, CENPF, NUSAP1, CDC20, BIRC5, PBK, HMGA2, SUGT1, UBE2C, SMC2, CDK2, DCTN1, NCAPD2, EML4, CDC25B, CCNB1, MAD2L1, CCNB2, PLK1, ZWINT, SETD8, DSCC1	1149	121	4909	1.62422	0.749824	0.0518969	0.705326
SP_PIR_KEYWORDS	mitosis	38	2.5066	0.000672416	KIF23, MAD1L1, KIFC1, ANAPC13, NEK1, KNTC1, ANLN, PTTG1, CEP55, CD2AP, SPC24, ACTG1, NCAPH, NCAPG, CCNA2, STAG1, CDCA3, CSNK1A1, ACTB, CDK1, DSN1, CENPF, CASC5, NUSAP1, CDC20, BIRC5, HMGA2, UBE2C, SMC2, CDK2, NCAPD2, CDC25B, CCNB1, MAD2L1, CCNB2, PLK1, ZWINT, SETD8	1436	100	6373	1.68645	0.337894	0.0177676	0.991408
GOTERM_BP_FAT	GO:0000279~M phase	55	3.62797	0.000691913	KIF23, KIF22, KIFC1, MAD1L1, PRC1, KNTC1, AURKA, RBM7, PTTG1, CD2AP, CCNA2, TUBB3, CDCA3, STAG1, CDK1, DSN1, LIG3, TPX2, NUSAP1, PBK, MYH9, HMGA2, TACC3, UBE2C, CDK2, DCTN1, NCAPD2, EML4, FMN2, MAD2L1, ZWINT, STMN1, DSCC1, ANAPC13, NEK1, ANLN, CEP55, SPC24, NCAPH, NCAPG, APC, TRIP13, DLGAP5, KIF18A, CENPF, BIRC5, CDC20, SUGT1, SMC2, CDC25B, CCNB1, MPHOSPH9, CCNB2, PLK1, SETD8	1149	155	4909	1.51602	0.917005	0.0726495	1.26344
GOTERM_BP_FAT	GO:0007049~cell cycle	112	7.38786	0.00112192	KIFC1, S100A6, PRC1, KNTC1, AURKA, RBM7, PTTG1, CD2AP, TGFB1, ILK, MAP3K8, SUPT5H, CCNA2, STAG1, CDCA3, LIG1, LIG3, TACC3, MYH9, AHR, DCTN1, TACC1, NCAPD2, PPP1CA, KRT18, UHRF2, MAD2L1, ZWINT, MAPK3, PELO, STMN1, SEPT6, DST, SEPT9, DSCC1, ANAPC13, NEK1, ANLN, ITGB1, SPC24, AK1, CDC20, SUGT1, GAS7, PSMB8, PLK3, PLK2, PLK1, MYH10, KIF23, STEAP3, MAD1L1, KIF22, E2F7, CDT1, MCM7, PCBP4, FANCI, TUBB3,…	1149	368	4909	1.3003	0.982344	0.0959918	2.041
GOTERM_BP_FAT	GO:0022403~cell cycle phase	66	4.35356	0.00127291	KIF23, MAD1L1, KIF22, KIFC1, PRC1, KNTC1, AURKA, RBM7, PTTG1, CD2AP, CCNA2, TUBB3, CDCA3, STAG1, CDK1, DSN1, LIG3, TPX2, NUSAP1, PBK, MYH9, HMGA2, TACC3, UBE2C, DCTN1, CDK2, NCAPD2, EML4, FMN2, INHBA, CCND1, MAD2L1, ZWINT, CDK2AP1, STMN1, ACVR1, DSCC1, BCAT1, ANAPC13, NEK1, ANLN, ZNF655, CEP55, ITGB1, SPC24, NCAPH, NCAPG, KRT7, APC, NFATC1, TRIP13, DLGAP5, KIF18A, CENPF, CDC20, BIRC5, CDKN3, SUGT…	1149	198	4909	1.42414	0.989748	0.105701	2.31267
GOTERM_BP_FAT	GO:0000278~mitotic cell cycle	62	4.08971	0.00879248	KIF23, MAD1L1, KIF22, KIFC1, PRC1, KNTC1, AURKA, PTTG1, CD2AP, CCNA2, TUBB3, CDCA3, STAG1, CDK1, DSN1, TPX2, NUSAP1, PBK, HMGA2, UBE2C, CDK2, DCTN1, NCAPD2, EML4, INHBA, CCND1, MAD2L1, PSME2, ZWINT, CDK2AP1, STMN1, ACVR1, DSCC1, BCAT1, ANAPC13, NEK1, ANLN, CEP55, ITGB1, SPC24, NCAPH, NCAPG, CENPA, APC, NFATC1, DLGAP5, KIF18A, CENPF, CDC20, BIRC5, CDKN3, SUGT1, SMC2, PSMB8, CDC25B, CCNB1, MPHOSPH9…	1149	198	4909	1.33783	1	0.341548	14.9757
SP_PIR_KEYWORDS	cell cycle	66	4.35356	0.0102303	STEAP3, KIF23, MAD1L1, KIFC1, PRC1, E2F7, KNTC1, AURKA, PTTG1, CD2AP, CDT1, MCM7, FANCI, CCNA2, CDCA3, STAG1, CDK1, DSN1, LIG1, LIG3, NUSAP1, MCM2, CDK7, HMGA2, UBE2C, AHR, TACC1, CDK2, NCAPD2, PPP1CA, CCND1, MAD2L1, UHRF2, KRT18, ZWINT, MAPK3, CDK2AP1, PELO, SEPT6, SEPT9, DSCC1, ANAPC13, NEK1, ANLN, CEP55, SPC24, NCAPH, TSPYL2, NCAPG, CSNK1A1, DLGAP5, CASC5, CENPF, CDC20, BIRC5, RACGAP1, CDKN3, …	1436	222	6373	1.31941	0.99817	0.142508	14.1285
GOTERM_BP_FAT	GO:0022402~cell cycle process	82	5.40897	0.0145648	KIF23, MAD1L1, KIFC1, KIF22, PRC1, KNTC1, AURKA, RBM7, PTTG1, CD2AP, TGFB1, PCBP4, ILK, CCNA2, TUBB3, CDCA3, STAG1, CDK1, DSN1, LIG3, TPX2, NUSAP1, PBK, MYH9, HMGA2, TACC3, UBE2C, DCTN1, CDK2, NCAPD2, EML4, EIF4G2, FMN2, INHBA, CCND1, MAD2L1, PSME2, ZWINT, CDK2AP1, STMN1, DST, PPP1R15A, DSCC1, ACVR1, BCAT1, ANAPC13, NEK1, ANLN, ZNF655, CEP55, TCF7L2, ITGB1, SPC24, NCAPH, CENPA, NCAPG, KRT7, THBS1…	1149	279	4909	1.25569	1	0.422811	23.6257
Annotation Cluster 17	Enrichment Score: 3.0121413769586707
Category	Term	Count	%	PValue	Genes	List Total	Pop Hits	Pop Total	Fold Enrichment	Bonferroni	Benjamini	FDR
KEGG_PATHWAY	hsa05412:Arrhythmogenic right ventricular cardiomyopathy (ARVC)	19	1.2533	0.000220096	ACTB, TCF7, ACTN4, LMNA, ITGA1, ITGA11, ACTN1, ITGA4, CDH2, CTNNA1, TCF7L2, ITGB1, ACTG1, DES, ATP2A2, ITGA5, ITGAV, DSP, SGCD	476	35	2054	2.3425	0.0358805	0.0121061	0.267106
KEGG_PATHWAY	hsa05414:Dilated cardiomyopathy	18	1.18734	0.00170913	ACTB, ADCY7, LMNA, ITGA1, ITGA11, ITGA4, TPM2, ITGB1, TPM1, TPM4, TGFB1, TPM3, ACTG1, DES, ATP2A2, ITGA5, ITGAV, SGCD	476	37	2054	2.09925	0.247202	0.0348722	2.05705
KEGG_PATHWAY	hsa05410:Hypertrophic cardiomyopathy (HCM)	18	1.18734	0.0024445	ACTB, IL6, LMNA, ITGA1, ITGA11, ITGA4, TPM2, ITGB1, TPM1, TPM4, TGFB1, TPM3, ACTG1, DES, ATP2A2, ITGA5, ITGAV, SGCD	476	38	2054	2.04401	0.333878	0.0441388	2.9301
Annotation Cluster 18	Enrichment Score: 2.613438584253528
Category	Term	Count	%	PValue	Genes	List Total	Pop Hits	Pop Total	Fold Enrichment	Bonferroni	Benjamini	FDR
INTERPRO	IPR000859:CUB	14	0.923483	6.94578e-05	DCBLD2, NRP2, DCBLD1, NRP1, MASP1, SCUBE3, PAMR1, CSMD2, PCOLCE, PCOLCE2, TNFAIP6, LRP10, PDGFC, PDGFD	1342	20	5842	3.04724	0.115196	0.0151822	0.117588
SMART	SM00042:CUB	14	0.923483	0.000494568	DCBLD2, NRP2, DCBLD1, NRP1, MASP1, SCUBE3, PAMR1, CSMD2, PCOLCE, PCOLCE2, TNFAIP6, LRP10, PDGFC, PDGFD	863	20	3133	2.54125	0.153137	0.0407025	0.670215
UP_SEQ_FEATURE	domain:CUB	7	0.461741	0.00575486	DCBLD2, DCBLD1, TNFAIP6, SCUBE3, PAMR1, PDGFC, PDGFD	1436	9	6370	3.45017	1	0.511314	10.1294
UP_SEQ_FEATURE	domain:CUB 1	7	0.461741	0.0208167	NRP2, NRP1, LRP10, MASP1, PCOLCE, CSMD2, PCOLCE2	1436	11	6370	2.82287	1	0.80173	32.2452
UP_SEQ_FEATURE	domain:CUB 2	7	0.461741	0.0208167	NRP2, NRP1, LRP10, MASP1, PCOLCE, CSMD2, PCOLCE2	1436	11	6370	2.82287	1	0.80173	32.2452
Annotation Cluster 19	Enrichment Score: 2.5755881014166295
Category	Term	Count	%	PValue	Genes	List Total	Pop Hits	Pop Total	Fold Enrichment	Bonferroni	Benjamini	FDR
GOTERM_MF_FAT	GO:0001871~pattern binding	30	1.97889	0.000201426	FGF7, CCL2, ENPP2, PGF, SUSD2, POSTN, DCN, CXCL6, APLP1, HMMR, SERPINE2, CD44, CTGF, COMP, ACAN, THBS1, PTX3, THBS2, CYR61, FN1, HAPLN1, HAPLN3, TNXB, COL13A1, PCOLCE2, TNFAIP6, BGN, LAYN, VCAN, ENG	1081	67	4649	1.92566	0.190809	0.0297929	0.319785
GOTERM_MF_FAT	GO:0030247~polysaccharide binding	30	1.97889	0.000201426	FGF7, CCL2, ENPP2, PGF, SUSD2, POSTN, DCN, CXCL6, APLP1, HMMR, SERPINE2, CD44, CTGF, COMP, ACAN, THBS1, PTX3, THBS2, CYR61, FN1, HAPLN1, HAPLN3, TNXB, COL13A1, PCOLCE2, TNFAIP6, BGN, LAYN, VCAN, ENG	1081	67	4649	1.92566	0.190809	0.0297929	0.319785
GOTERM_MF_FAT	GO:0005539~glycosaminoglycan binding	27	1.781	0.000767066	FGF7, CCL2, PGF, POSTN, DCN, CXCL6, APLP1, HMMR, SERPINE2, CD44, CTGF, COMP, ACAN, THBS1, THBS2, CYR61, FN1, HAPLN1, HAPLN3, TNXB, COL13A1, PCOLCE2, TNFAIP6, BGN, LAYN, VCAN, ENG	1081	62	4649	1.87286	0.55358	0.0649993	1.21268
GOTERM_MF_FAT	GO:0030246~carbohydrate binding	41	2.70449	0.00805347	FGF7, CCL2, GALNT7, ENPP2, PGF, GALNT5, SUSD2, POSTN, DCN, CXCL6, GPCPD1, HMMR, APLP1, GALNT10, CD44, SERPINE2, CTGF, COMP, ACAN, PTX3, THBS1, THBS2, FN1, CYR61, HAPLN1, TNXB, HAPLN3, LGALS3, COL13A1, PFKP, CHI3L1, COLEC12, CLEC11A, PCOLCE2, TNFAIP6, BGN, G6PD, LAYN, VCAN, ENG, PRPS1	1081	121	4649	1.45724	0.999796	0.320429	12.0646
SP_PIR_KEYWORDS	heparin-binding	13	0.85752	0.0176974	COL13A1, PGF, POSTN, CXCL6, APLP1, PCOLCE2, SERPINE2, CTGF, COMP, THBS1, THBS2, FN1, CYR61	1436	29	6373	1.98946	0.999982	0.177543	23.2404
GOTERM_MF_FAT	GO:0008201~heparin binding	16	1.05541	0.0793439	FGF7, CCL2, TNXB, COL13A1, PGF, POSTN, CXCL6, PCOLCE2, APLP1, SERPINE2, CTGF, COMP, THBS1, THBS2, FN1, CYR61	1081	45	4649	1.52912	1	0.836362	73.137
Annotation Cluster 20	Enrichment Score: 2.526886608318603
Category	Term	Count	%	PValue	Genes	List Total	Pop Hits	Pop Total	Fold Enrichment	Bonferroni	Benjamini	FDR
GOTERM_BP_FAT	GO:0042060~wound healing	39	2.57256	3.2422e-07	DCBLD2, PPARD, FGF7, C9, ERBB2, ELK3, TIMP3, TPM1, TGFB1, CD9, HMCN1, CD44, PROCR, GSN, SERPINE1, LOX, NRG1, TFPI2, FN1, B4GALT1, PLAT, KLF6, IL6, EFEMP2, PLAUR, CCNB1, PLSCR1, SDC1, THBD, HIF1A, ITGA5, FBLN5, F3, PDGFRA, DSP, ENG, PLAU, F2R, MYH10	1149	76	4909	2.19242	0.00116522	0.000129536	0.000595592
GOTERM_BP_FAT	GO:0050817~coagulation	16	1.05541	0.00597111	PLAT, IL6, C9, EFEMP2, PLAUR, CD9, PLSCR1, HMCN1, THBD, PROCR, FBLN5, F3, SERPINE1, TFPI2, PLAU, F2R	1149	34	4909	2.01055	1	0.289544	10.4182
GOTERM_BP_FAT	GO:0007596~blood coagulation	16	1.05541	0.00597111	PLAT, IL6, C9, EFEMP2, PLAUR, CD9, PLSCR1, HMCN1, THBD, PROCR, FBLN5, F3, SERPINE1, TFPI2, PLAU, F2R	1149	34	4909	2.01055	1	0.289544	10.4182
GOTERM_BP_FAT	GO:0007599~hemostasis	16	1.05541	0.0111324	PLAT, IL6, C9, EFEMP2, PLAUR, CD9, PLSCR1, HMCN1, THBD, PROCR, FBLN5, F3, SERPINE1, TFPI2, PLAU, F2R	1149	36	4909	1.89885	1	0.380748	18.5881
GOTERM_BP_FAT	GO:0050878~regulation of body fluid levels	19	1.2533	0.012014	PLAT, KCNMA1, IL6, C9, EFEMP2, ANXA2P3, PLAUR, ANXA2P2, ANXA2, CD9, PLSCR1, HMCN1, THBD, PROCR, F3, FBLN5, SERPINE1, TFPI2, PLAU, F2R	1149	46	4909	1.76469	1	0.389764	19.9112
KEGG_PATHWAY	hsa04610:Complement and coagulation cascades	11	0.725594	0.0168807	PLAT, C9, THBD, MASP1, F3, SERPINE1, BDKRB1, BDKRB2, PLAU, F2R, PLAUR	476	22	2054	2.15756	0.940758	0.171723	18.687
SP_PIR_KEYWORDS	blood coagulation	6	0.395778	0.0785558	THBD, PROCR, F3, TFPI2, PLAU, F2R	1436	11	6373	2.42074	1	0.478641	70.2357
Annotation Cluster 21	Enrichment Score: 2.432520350566763
Category	Term	Count	%	PValue	Genes	List Total	Pop Hits	Pop Total	Fold Enrichment	Bonferroni	Benjamini	FDR
GOTERM_CC_FAT	GO:0042641~actomyosin	10	0.659631	0.00217457	PDLIM7, ACTN4, ILK, FHL3, ZYX, MYH9, TPM1, DBN1, MYH10, SEPT9	1059	15	4615	2.90526	0.692021	0.0372784	3.1199
GOTERM_CC_FAT	GO:0032432~actin filament bundle	10	0.659631	0.00396799	PDLIM7, ACTN4, CRYAB, ILK, FHL3, ZYX, MYH9, TPM1, MYH10, SEPT9	1059	16	4615	2.72368	0.883627	0.0579987	5.62449
GOTERM_CC_FAT	GO:0001725~stress fiber	9	0.593668	0.00584111	PDLIM7, ACTN4, ILK, FHL3, ZYX, MYH9, TPM1, MYH10, SEPT9	1059	14	4615	2.8015	0.957967	0.07805	8.17591
Annotation Cluster 22	Enrichment Score: 2.339163871640045
Category	Term	Count	%	PValue	Genes	List Total	Pop Hits	Pop Total	Fold Enrichment	Bonferroni	Benjamini	FDR
SP_PIR_KEYWORDS	sh3 domain	35	2.30871	0.000562494	SH3RF1, FUT8, BCAR1, RUSC2, ASAP2, ASAP1, ABI2, ABI1, CD2AP, SORBS3, DOCK1, PACSIN2, SORBS2, TRIP10, NPHP1, SASH1, SH3PXD2A, BAIAP2L2, MYO1E, MPP5, AHI1, TRIO, DOCK5, VAV2, GAS7, SH3BP4, TJP1, EPS8, FCHSD2, SH3KBP1, FCHSD1, ABL2, DST, EPS8L2, SRGAP1	1436	89	6373	1.74529	0.291713	0.0155553	0.829969
INTERPRO	IPR001452:Src homology-3 domain	34	2.24274	0.00138634	SH3RF1, FUT8, BCAR1, RUSC2, ASAP2, ASAP1, ABI2, ABI1, CD2AP, SORBS3, DOCK1, PACSIN2, SORBS2, TRIP10, NPHP1, SASH1, SH3PXD2A, BAIAP2L2, MYO1E, MPP5, AHI1, TRIO, DOCK5, VAV2, GAS7, SH3BP4, TJP1, EPS8, FCHSD2, SH3KBP1, FCHSD1, ABL2, EPS8L2, SRGAP1	1342	88	5842	1.68192	0.913223	0.13393	2.32252
UP_SEQ_FEATURE	domain:SH3	25	1.64908	0.0227911	SASH1, BAIAP2L2, FUT8, MYO1E, BCAR1, RUSC2, MPP5, ASAP2, ABI2, AHI1, ASAP1, ABI1, DOCK5, GAS7, SH3BP4, TJP1, DOCK1, EPS8, PACSIN2, TRIP10, ABL2, EPS8L2, DST, SRGAP1, NPHP1	1436	72	6370	1.54025	1	0.824235	34.7292
SMART	SM00326:SH3	34	2.24274	0.0247509	SH3RF1, FUT8, BCAR1, RUSC2, ASAP2, ASAP1, ABI2, ABI1, CD2AP, SORBS3, DOCK1, PACSIN2, SORBS2, TRIP10, NPHP1, SASH1, SH3PXD2A, BAIAP2L2, MYO1E, MPP5, AHI1, TRIO, DOCK5, VAV2, GAS7, SH3BP4, TJP1, EPS8, FCHSD2, SH3KBP1, FCHSD1, ABL2, EPS8L2, SRGAP1	863	88	3133	1.40264	0.99978	0.45201	28.8722
Annotation Cluster 23	Enrichment Score: 2.2844893591701534
Category	Term	Count	%	PValue	Genes	List Total	Pop Hits	Pop Total	Fold Enrichment	Bonferroni	Benjamini	FDR
INTERPRO	IPR003599:Immunoglobulin subtype	31	2.04485	0.000862349	IL1R1, ADAMTSL1, GPR124, PTK7, NEO1, ALCAM, VCAM1, HMCN1, SPEG, SEMA7A, SEMA3D, ACAN, SEMA3B, NEGR1, BOC, ICAM1, HAPLN3, ALPK2, NFASC, AXL, MALT1, MXRA8, NEXN, SIRPA, MXRA5, PSG5, PDGFRA, VCAN, JAM3, NTM, MYLK	1342	76	5842	1.77565	0.781313	0.0963751	1.45072
INTERPRO	IPR013098:Immunoglobulin I-set	21	1.38522	0.00111892	ADAMTSL1, ALPK2, PTK7, NFASC, TRIO, NEO1, PALLD, NEXN, MXRA5, ISLR, VCAM1, HMCN1, UNC5B, SPEG, KAZALD1, PDGFRA, ROBO3, BOC, NEGR1, MYLK, NTM	1342	45	5842	2.0315	0.860911	0.115993	1.87851
INTERPRO	IPR007110:Immunoglobulin-like	41	2.70449	0.00201379	IL1R1, ADAMTSL1, GPR124, PTK7, NEO1, TAPBP, ISLR, VCAM1, ALCAM, HMCN1, UNC5B, SPEG, SEMA7A, SEMA3D, ACAN, SEMA3B, ROBO3, NRG1, BOC, NEGR1, HAPLN1, HAPLN3, ALPK2, NFASC, AXL, TRIO, MALT1, MXRA8, NEXN, PALLD, SIRPA, TMEM25, MXRA5, PSG5, KAZALD1, PDGFRA, HLA-DPA1, VCAN, JAM3, NTM, MYLK	1342	114	5842	1.56563	0.971329	0.179077	3.35692
SP_PIR_KEYWORDS	Immunoglobulin domain	40	2.63852	0.00223124	IL1R1, ADAMTSL1, GPR124, PTK7, NEO1, TAPBP, ISLR, VCAM1, ALCAM, HMCN1, UNC5B, SPEG, SEMA7A, SEMA3D, ACAN, SEMA3B, ROBO3, NRG1, BOC, NEGR1, ICAM1, HAPLN1, HAPLN3, ALPK2, NFASC, AXL, TRIO, MALT1, MXRA8, NEXN, PALLD, SIRPA, TMEM25, PSG5, KAZALD1, PDGFRA, VCAN, JAM3, NTM, MYLK	1436	113	6373	1.57098	0.745709	0.0446166	3.25459
UP_SEQ_FEATURE	domain:Ig-like C2-type 4	12	0.791557	0.00266542	VCAM1, ICAM1, HMCN1, PDGFRA, NFASC, PTK7, ROBO3, NEO1, PALLD, BOC, MXRA5, MYLK	1436	21	6370	2.53482	0.999965	0.417402	4.81891
UP_SEQ_FEATURE	domain:Ig-like C2-type 3	16	1.05541	0.00290436	ICAM1, IL1R1, PTK7, NFASC, NEO1, PALLD, MXRA5, VCAM1, ALCAM, HMCN1, PDGFRA, ROBO3, BOC, NEGR1, MYLK, NTM	1436	33	6370	2.15076	0.999986	0.428403	5.23999
INTERPRO	IPR013783:Immunoglobulin-like fold	44	2.90237	0.00304903	IL1R1, ADAMTSL1, PTK7, NEO1, GPCPD1, TAPBP, ISLR, VCAM1, ALCAM, HMCN1, UNC5B, SPEG, ACAN, NFATC4, SEMA3B, ROBO3, NRG1, BOC, NEGR1, NFATC1, ICAM1, HAPLN1, HAPLN3, ALPK2, NFASC, AXL, TRIO, MALT1, MXRA8, NEXN, PALLD, FLNC, SIRPA, FLNB, FLNA, MXRA5, PSG5, KAZALD1, PDGFRA, HLA-DPA1, VCAN, JAM3, NTM, MYLK	1342	127	5842	1.5082	0.995395	0.216961	5.04109
UP_SEQ_FEATURE	domain:Ig-like C2-type 5	10	0.659631	0.00350948	VCAM1, ICAM1, HMCN1, PDGFRA, NFASC, PTK7, ROBO3, PALLD, MXRA5, MYLK	1436	16	6370	2.77246	0.999999	0.459143	6.29854
INTERPRO	IPR003598:Immunoglobulin subtype 2	24	1.58311	0.00402722	ADAMTSL1, ALPK2, PTK7, NFASC, TRIO, MALT1, NEO1, PALLD, MXRA5, ISLR, VCAM1, HMCN1, UNC5B, SPEG, KAZALD1, PSG5, PDGFRA, ROBO3, NRG1, JAM3, BOC, NEGR1, MYLK, NTM	1342	59	5842	1.77079	0.999183	0.239267	6.60702
UP_SEQ_FEATURE	domain:Ig-like C2-type 1	20	1.31926	0.00437498	ICAM1, IL1R1, ADAMTSL1, AXL, PTK7, NFASC, MALT1, NEO1, PALLD, MXRA5, VCAM1, ALCAM, HMCN1, PSG5, PDGFRA, ROBO3, BOC, NEGR1, MYLK, NTM	1436	47	6370	1.88763	1	0.477213	7.79314
UP_SEQ_FEATURE	domain:Ig-like C2-type 2	20	1.31926	0.00437498	ICAM1, IL1R1, ADAMTSL1, AXL, PTK7, NFASC, MALT1, NEO1, PALLD, MXRA5, VCAM1, ALCAM, HMCN1, PSG5, PDGFRA, ROBO3, BOC, NEGR1, MYLK, NTM	1436	47	6370	1.88763	1	0.477213	7.79314
SMART	SM00409:IG	31	2.04485	0.0148209	IL1R1, ADAMTSL1, GPR124, PTK7, NEO1, ALCAM, VCAM1, HMCN1, SPEG, SEMA7A, SEMA3D, ACAN, SEMA3B, NEGR1, BOC, ICAM1, HAPLN3, ALPK2, NFASC, AXL, MALT1, MXRA8, NEXN, SIRPA, MXRA5, PSG5, PDGFRA, VCAN, JAM3, NTM, MYLK	863	76	3133	1.4808	0.993376	0.394506	18.3706
SMART	SM00408:IGc2	24	1.58311	0.0356314	ADAMTSL1, ALPK2, PTK7, NFASC, TRIO, MALT1, NEO1, PALLD, MXRA5, ISLR, VCAM1, HMCN1, UNC5B, SPEG, KAZALD1, PSG5, PDGFRA, ROBO3, NRG1, JAM3, BOC, NEGR1, MYLK, NTM	863	59	3133	1.47676	0.999995	0.533229	38.9334
INTERPRO	IPR013106:Immunoglobulin V-set	14	0.923483	0.0409154	HAPLN1, HAPLN3, AXL, MXRA8, SIRPA, VCAM1, PSG5, SEMA3D, ACAN, SEMA3B, VCAN, BOC, NEGR1, JAM3	1342	35	5842	1.74128	1	0.712811	50.7191
INTERPRO	IPR013151:Immunoglobulin	17	1.12137	0.090332	IL1R1, ADAMTSL1, PTK7, NFASC, MALT1, NEO1, MXRA5, VCAM1, ALCAM, HMCN1, PSG5, PDGFRA, NRG1, JAM3, BOC, NEGR1, NTM	1342	50	5842	1.48009	1	0.898245	79.8847
Annotation Cluster 24	Enrichment Score: 2.200245184045185
Category	Term	Count	%	PValue	Genes	List Total	Pop Hits	Pop Total	Fold Enrichment	Bonferroni	Benjamini	FDR
GOTERM_BP_FAT	GO:0031032~actomyosin structure organization	11	0.725594	6.67473e-05	ACTG1, KRT19, TRPM7, LIMCH1, LMO7, CNN2, CNN1, RACGAP1, TPM1, ITGB1, MYH10	1149	13	4909	3.61512	0.213397	0.0125538	0.122544
GOTERM_BP_FAT	GO:0055002~striated muscle cell development	11	0.725594	0.00529924	ACTG1, KRT19, SDC1, TNC, ERBB2, RCAN1, AGRN, TPM1, ITGB1, MYH10, F2R	1149	19	4909	2.4735	1	0.272722	9.2994
GOTERM_BP_FAT	GO:0055001~muscle cell development	11	0.725594	0.00529924	ACTG1, KRT19, SDC1, TNC, ERBB2, RCAN1, AGRN, TPM1, ITGB1, MYH10, F2R	1149	19	4909	2.4735	1	0.272722	9.2994
GOTERM_BP_FAT	GO:0010927~cellular component assembly involved in morphogenesis	8	0.527704	0.026884	ACTG1, CD9, KRT19, ILK, CASC5, TPM1, ITGB1, MYH10	1149	14	4909	2.44138	1	0.555098	39.3845
GOTERM_BP_FAT	GO:0030239~myofibril assembly	5	0.329815	0.0296282	ACTG1, KRT19, TPM1, ITGB1, MYH10	1149	6	4909	3.56034	1	0.576143	42.4489
GOTERM_BP_FAT	GO:0045214~sarcomere organization	4	0.263852	0.0421181	ACTG1, KRT19, TPM1, ITGB1	1149	4	4909	4.27241	1	0.656017	54.6372
Annotation Cluster 25	Enrichment Score: 2.154106787484442
Category	Term	Count	%	PValue	Genes	List Total	Pop Hits	Pop Total	Fold Enrichment	Bonferroni	Benjamini	FDR
UP_SEQ_FEATURE	topological domain:Extracellular	170	11.2137	3.57942e-07	ATP1B1, SLC44A2, PLXNA2, GPR124, TSPAN4, TSPAN5, LPAR1, ATP2B1, PTGIR, S1PR1, UNC5B, CD44, SLC2A3, FAP, ELTD1, ROBO3, FAS, PI16, ADAM9, TMEM204, EFNB3, CA12, TMEM200A, MRGPRF, COLEC12, TMEM25, SIRPA, THBD, LRP10, HAS1, BACE2, F3, PDGFRA, HLA-DPA1, SLC38A1, SEC61G, DCBLD2, SLC38A4, DCBLD1, IL1R1, SLC38A2, PANX1, TNFRSF12A, ERBB2, PTK7, ITGA11, BMPR2, MME, BDKRB1, BDKRB2, FXYD5, ITGB1, CD74, CSMD2,…	1436	537	6370	1.4043	0.0013757	0.000344102	0.000662361
UP_SEQ_FEATURE	topological domain:Cytoplasmic	237	15.6332	5.97595e-06	ATP1B1, ADCY7, GPR124, SGMS1, LPAR1, ATP2B1, S1PR1, CD44, FAP, CREB3L2, CREB3L1, FAS, PI16, ADAM9, EFNB3, TMEM200A, COLEC12, LPCAT2, TMEM25, SIRPA, MGAT1, HAS1, ATP2C1, F3, BACE2, PDGFRA, HLA-DPA1, EXT1, HS3ST3B1, DCBLD2, DCBLD1, IL1R1, ERBB2, ITGA11, MME, BDKRB1, BDKRB2, SORCS2, CD74, ALCAM, PROCR, TCTN2, GCNT1, TRAM1, MGAT4B, TGFBR1, NDFIP1, ATP11C, KCNK2, PCDH18, SYNE1, ATP2A2, HEPH, TMEM119, …	1436	823	6370	1.27742	0.0227215	0.00327798	0.0110578
SP_PIR_KEYWORDS	membrane	472	31.1346	0.0952156	SLC9A7, PEAR1, STRN, SGMS1, MAGED1, DIRAS1, MALL, FAP, CH25H, ILK, FAS, RAB27B, GNG5, ADAM9, MAGI1, ROCK1, CCDC136, COLEC12, LPCAT2, BCL2L13, CTNNA1, SIRPA, LPCAT4, PLAUR, PTRF, F3, BACE2, SURF4, HLA-DPA1, DCBLD2, ORAI2, DCBLD1, IL1R1, RALGPS2, CYP1B1, ERBB2, SORCS2, ALCAM, CDC42EP1, PROCR, CDC42EP3, CDC42EP5, MGAT4B, TGFBR1, PPAPDC1A, ATP11C, KCNK2, PCDH18, VDAC1, SYNE1, APCDD1L, RGS3, SMURF2, T…	1436	2000	6373	1.04737	1	0.531038	77.2845
GOTERM_CC_FAT	GO:0031224~intrinsic to membrane	379	25	0.198027	CALHM2, LYPD1, SLC9A7, ATP1B1, PEAR1, ADCY7, GPR124, LPAR1, SGMS1, SHKBP1, ATP2B1, S1PR1, MALL, CD44, CH25H, FAP, SEMA7A, PRRT1, CREB3L2, CREB3L1, FAS, RAB27B, PI16, ADAM9, RECK, RARG, EFNB3, TMEM200A, CCDC136, COLEC12, LPCAT2, BCL2L13, MYH9, SIRPA, TMEM25, LPCAT4, PLAUR, MGAT1, MAD2L1, HAS1, ATP2C1, F3, BACE2, PDGFRA, SURF4, HLA-DPA1, EXT1, HS3ST3B1, DCBLD2, ORAI2, DCBLD1, IL1R1, ENPP2, ERBB2, P…	1059	1597	4615	1.03421	1	0.766821	95.9768
SP_PIR_KEYWORDS	transmembrane	331	21.8338	0.217533	CALHM2, SLC9A7, ATP1B1, PEAR1, ADCY7, GPR124, SGMS1, LPAR1, ATP2B1, S1PR1, MALL, CD44, CH25H, FAP, PRRT1, CREB3L2, CREB3L1, FAS, PI16, ADAM9, EFNB3, TMEM200A, CCDC136, COLEC12, LPCAT2, BCL2L13, TMEM25, SIRPA, LPCAT4, MGAT1, HAS1, ATP2C1, F3, BACE2, PDGFRA, SURF4, HLA-DPA1, EXT1, HS3ST3B1, DCBLD2, ORAI2, DCBLD1, IL1R1, ERBB2, PTPLAD2, ITGA11, MME, BDKRB1, BDKRB2, SORCS2, CD74, ALCAM, PROCR, TCTN2,…	1436	1416	6373	1.03742	1	0.754716	97.3579
UP_SEQ_FEATURE	transmembrane region	327	21.5699	0.256369	CALHM2, SLC9A7, ATP1B1, PEAR1, ADCY7, GPR124, SGMS1, LPAR1, ATP2B1, S1PR1, MALL, CD44, CH25H, FAP, PRRT1, CREB3L2, CREB3L1, FAS, PI16, ADAM9, EFNB3, TMEM200A, CCDC136, COLEC12, LPCAT2, BCL2L13, TMEM25, SIRPA, LPCAT4, MGAT1, HAS1, ATP2C1, F3, BACE2, PDGFRA, SURF4, HLA-DPA1, EXT1, HS3ST3B1, DCBLD2, ORAI2, DCBLD1, IL1R1, ERBB2, PTPLAD2, ITGA11, MME, BDKRB1, BDKRB2, SORCS2, CD74, ALCAM, PROCR, TCTN2,…	1436	1405	6370	1.03242	1	0.999925	99.5836
GOTERM_CC_FAT	GO:0016021~integral to membrane	358	23.6148	0.37086	CALHM2, SLC9A7, ATP1B1, PEAR1, ADCY7, GPR124, SGMS1, LPAR1, SHKBP1, ATP2B1, S1PR1, MALL, CD44, CH25H, FAP, PRRT1, CREB3L2, CREB3L1, FAS, PI16, ADAM9, RARG, EFNB3, TMEM200A, CCDC136, COLEC12, LPCAT2, BCL2L13, MYH9, SIRPA, TMEM25, LPCAT4, PLAUR, MGAT1, MAD2L1, HAS1, ATP2C1, F3, BACE2, PDGFRA, SURF4, HLA-DPA1, EXT1, HS3ST3B1, DCBLD2, ORAI2, DCBLD1, IL1R1, ENPP2, ERBB2, PTPLAD2, ITGA11, MME, BDKRB1, …	1059	1535	4615	1.01637	1	0.912313	99.8826
Annotation Cluster 26	Enrichment Score: 2.1154222459816276
Category	Term	Count	%	PValue	Genes	List Total	Pop Hits	Pop Total	Fold Enrichment	Bonferroni	Benjamini	FDR
UP_SEQ_FEATURE	DNA-binding region:Basic motif	28	1.84697	0.00172087	FOSL2, MXI1, ATF1, FOS, NPAS1, AHRR, HAND2, JUND, CREB3L2, CREB3L1, ATOH8, BHLHE40, ARNTL2, TCF4, FOSL1, SREBF1, MAFF, CREB3, CEBPD, CREB1, FOSB, AHR, JUNB, SREBF2, HES1, HIF1A, NFE2L1, TCF12	1436	70	6370	1.77437	0.998672	0.322711	3.13692
INTERPRO	IPR001092:Basic helix-loop-helix dimerisation region bHLH	19	1.2533	0.0032007	SREBF1, MXI1, AHR, SREBF2, HES1, NPAS1, AHRR, HIF1A, ID2, ID1, EBF3, HAND2, ID4, ID3, ATOH8, BHLHE40, ARNTL2, TCF4, TCF12	1342	42	5842	1.96931	0.996478	0.209715	5.28549
UP_SEQ_FEATURE	domain:Helix-loop-helix motif	18	1.18734	0.00506859	SREBF1, MXI1, AHR, SREBF2, HES1, NPAS1, AHRR, HIF1A, ID2, ID1, HAND2, ID4, ID3, ATOH8, ARNTL2, BHLHE40, TCF4, TCF12	1436	41	6370	1.94748	1	0.515108	8.9746
SMART	SM00353:HLH	19	1.2533	0.0224545	SREBF1, MXI1, AHR, SREBF2, HES1, NPAS1, AHRR, HIF1A, ID2, ID1, EBF3, HAND2, ID4, ID3, ATOH8, BHLHE40, ARNTL2, TCF4, TCF12	863	42	3133	1.64231	0.999515	0.470537	26.5614
INTERPRO	IPR011598:Helix-loop-helix DNA-binding	11	0.725594	0.0422381	SREBF1, HES1, ID1, HAND2, ATOH8, BHLHE40, ARNTL2, TCF4, MXI1, TCF12, SREBF2	1342	25	5842	1.91541	1	0.718423	51.8579
Annotation Cluster 27	Enrichment Score: 1.9911494223387542
Category	Term	Count	%	PValue	Genes	List Total	Pop Hits	Pop Total	Fold Enrichment	Bonferroni	Benjamini	FDR
GOTERM_CC_FAT	GO:0005882~intermediate filament	14	0.923483	0.000858282	NES, LMNB1, SYNC, VIM, LMNA, SLC1A4, KRT19, NME2, DES, KRT18, NME1-NME2, KRT7, MICAL1, KRTAP1-5, IFFO1	1059	24	4615	2.5421	0.371569	0.0177079	1.24241
GOTERM_CC_FAT	GO:0045111~intermediate filament cytoskeleton	15	0.989446	0.000965085	NES, LMNB1, SYNC, VIM, LMNA, SLC1A4, KRT19, NME2, DES, KRT18, NME1-NME2, KRT7, MICAL1, KRTAP1-5, IFFO1, DST	1059	27	4615	2.42105	0.406883	0.0191608	1.396
SP_PIR_KEYWORDS	Intermediate filament	10	0.659631	0.00190898	KRT19, NES, DES, KRT18, LMNB1, KRT7, VIM, SYNC, LMNA, IFFO1	1436	15	6373	2.95868	0.690043	0.0395856	2.79071
UP_SEQ_FEATURE	region of interest:Rod	9	0.593668	0.00522794	KRT19, NES, DES, KRT18, LMNB1, KRT7, VIM, SYNC, LMNA	1436	14	6370	2.85167	1	0.513237	9.24399
UP_SEQ_FEATURE	region of interest:Linker 1	9	0.593668	0.00522794	KRT19, NES, DES, KRT18, LMNB1, KRT7, VIM, SYNC, LMNA	1436	14	6370	2.85167	1	0.513237	9.24399
UP_SEQ_FEATURE	region of interest:Coil 1A	9	0.593668	0.00522794	KRT19, NES, DES, KRT18, LMNB1, KRT7, VIM, SYNC, LMNA	1436	14	6370	2.85167	1	0.513237	9.24399
UP_SEQ_FEATURE	region of interest:Coil 1B	9	0.593668	0.00522794	KRT19, NES, DES, KRT18, LMNB1, KRT7, VIM, SYNC, LMNA	1436	14	6370	2.85167	1	0.513237	9.24399
UP_SEQ_FEATURE	region of interest:Head	9	0.593668	0.00522794	KRT19, NES, DES, KRT18, LMNB1, KRT7, VIM, SYNC, LMNA	1436	14	6370	2.85167	1	0.513237	9.24399
INTERPRO	IPR018039:Intermediate filament protein, conserved site	9	0.593668	0.0059052	KRT19, NES, DES, KRT18, LMNB1, KRT7, VIM, SYNC, LMNA	1342	14	5842	2.79849	0.999971	0.302223	9.54552
INTERPRO	IPR001664:Intermediate filament protein	9	0.593668	0.0059052	KRT19, NES, DES, KRT18, LMNB1, KRT7, VIM, SYNC, LMNA	1342	14	5842	2.79849	0.999971	0.302223	9.54552
INTERPRO	IPR016044:Filament	8	0.527704	0.0151469	KRT19, NES, DES, KRT18, LMNB1, KRT7, VIM, LMNA	1342	13	5842	2.67889	1	0.48948	22.7816
UP_SEQ_FEATURE	region of interest:Coil 2	7	0.461741	0.0208167	KRT19, KRT18, LMNB1, KRT7, VIM, SYNC, LMNA	1436	11	6370	2.82287	1	0.80173	32.2452
PIR_SUPERFAMILY	PIRSF002282:cytoskeletal keratin	7	0.461741	0.0232425	KRT19, DES, KRT18, LMNB1, KRT7, VIM, LMNA	619	11	2678	2.75312	1	1	29.4472
UP_SEQ_FEATURE	region of interest:Tail	8	0.527704	0.0335068	NES, DES, KRT18, LMNB1, KRT7, VIM, SYNC, LMNA	1436	15	6370	2.36583	1	0.887477	46.7761
UP_SEQ_FEATURE	region of interest:Linker 2	5	0.329815	0.0498688	NES, DES, LMNB1, SYNC, LMNA	1436	7	6370	3.16852	1	0.946947	61.1948
UP_SEQ_FEATURE	region of interest:Linker 12	6	0.395778	0.052385	KRT19, NES, DES, KRT18, KRT7, VIM	1436	10	6370	2.66156	1	0.950171	63.053
UP_SEQ_FEATURE	site:Stutter	4	0.263852	0.0790948	KRT19, KRT18, KRT7, LMNA	1436	5	6370	3.54875	1	0.984544	78.2326
SP_PIR_KEYWORDS	keratin	4	0.263852	0.132086	KRT19, KRT18, KRT7, KRTAP1-5	1436	6	6373	2.95868	1	0.606925	87.7346
Annotation Cluster 28	Enrichment Score: 1.9367420481844313
Category	Term	Count	%	PValue	Genes	List Total	Pop Hits	Pop Total	Fold Enrichment	Bonferroni	Benjamini	FDR
GOTERM_BP_FAT	GO:0007423~sensory organ development	27	1.781	0.0032328	TWSG1, TSHZ1, IRX5, ERBB2, PRRX1, ABI2, PRRX2, GLI3, TGFB1, MEIS2, ECE1, COL8A1, APC, KCNMA1, RARG, CRYAB, RPGRIP1L, PRKCI, ALMS1, HES1, PKNOX1, JMJD6, PDGFRA, TGIF1, FOXC2, KLF4, MYH10	1149	67	4909	1.72172	0.999991	0.200623	5.77483
GOTERM_BP_FAT	GO:0001654~eye development	18	1.18734	0.012908	TWSG1, RARG, IRX5, CRYAB, PRKCI, RPGRIP1L, ABI2, ALMS1, GLI3, MEIS2, PKNOX1, JMJD6, TGIF1, FOXC2, COL8A1, KLF4, MYH10, APC	1149	43	4909	1.78845	1	0.398194	21.2321
GOTERM_BP_FAT	GO:0043010~camera-type eye development	14	0.923483	0.0370967	TWSG1, IRX5, CRYAB, RPGRIP1L, ABI2, GLI3, PKNOX1, JMJD6, TGIF1, FOXC2, COL8A1, KLF4, MYH10, APC	1149	34	4909	1.75923	1	0.63195	50.0641
Annotation Cluster 29	Enrichment Score: 1.9090167501372155
Category	Term	Count	%	PValue	Genes	List Total	Pop Hits	Pop Total	Fold Enrichment	Bonferroni	Benjamini	FDR
GOTERM_BP_FAT	GO:0030030~cell projection organization	55	3.62797	0.000579188	NRP2, S100A6, NRP1, ATL1, STRN, LPAR1, PRKG1, CD2AP, TTLL3, VCL, CD44, UNC5B, ILK, SEMA3B, ROBO3, SPON2, STX2, STMN3, EFNB3, ROCK1, MYH9, VASP, SLIT3, ADM, CC2D2A, VCAN, DST, NGF, ERBB2, CLU, ABI2, FXYD5, HPRT1, CAPZB, TPM1, ALCAM, RAC2, APC, FGD4, ACTB, IL6, KLF7, BAIAP2L2, CREB1, MAP1B, ITGA1, NTNG1, RPGRIP1L, NFASC, ALMS1, VAV2, GAS7, CDH13, CAPG, MYH10	1149	154	4909	1.52586	0.875489	0.0649968	1.05864
GOTERM_BP_FAT	GO:0030182~neuron differentiation	57	3.75989	0.000817856	NRP2, S100A6, NRP1, ATL1, STRN, RORA, PRKG1, GLI3, HOXC8, S1PR1, CD44, UNC5B, ILK, SEMA3B, ROBO3, SPON2, TUBB3, KCNMA1, STMN3, EFNB3, STMN2, EMX2, PRKCI, VASP, FARP2, SLIT3, HES1, HOXC10, BTG2, ADM, VCAN, DST, NGF, IRX5, ERBB2, CLU, ABI2, HPRT1, ALCAM, AGRN, APC, ACTB, IL6, KLF7, TGFBR1, CREB1, MAP1B, ITGA1, NTNG1, NFASC, ALMS1, GAS7, ID4, ID3, PBX3, NTM, MYH10	1149	163	4909	1.49403	0.947251	0.0784776	1.49178
GOTERM_BP_FAT	GO:0032989~cellular component morphogenesis	58	3.82586	0.000883934	NRP2, S100A4, S100A6, NRP1, ATL1, TGFB1, TTLL3, ACTG1, DAB2, UNC5B, ILK, SEMA3B, ROBO3, CAP1, SPON2, EFNB3, PRKCI, MYH9, ECT2, VASP, SLIT3, HES1, KRT19, HIF1A, ADM, CFL1, VCAN, LAMC1, DST, SHROOM3, ERBB2, CLU, PTK7, HPRT1, TPM1, ITGB1, ALCAM, CD9, EZR, CENPA, APC, NFATC1, FN1, ACTB, KLF7, CAP2, CREB1, MAP1B, ITGA1, NFASC, NTNG1, RPGRIP1L, ALMS1, CASC5, GAS7, ERBB2IP, ANTXR1, MYH10	1149	167	4909	1.48383	0.958416	0.082357	1.61139
GOTERM_BP_FAT	GO:0000902~cell morphogenesis	52	3.43008	0.00287469	NRP2, S100A4, S100A6, NRP1, ATL1, TGFB1, TTLL3, DAB2, UNC5B, ILK, SEMA3B, ROBO3, CAP1, SPON2, EFNB3, PRKCI, MYH9, ECT2, VASP, SLIT3, HES1, HIF1A, ADM, CFL1, VCAN, LAMC1, DST, SHROOM3, ERBB2, CLU, PTK7, HPRT1, ALCAM, EZR, CENPA, APC, NFATC1, FN1, ACTB, KLF7, CAP2, CREB1, MAP1B, ITGA1, NTNG1, RPGRIP1L, NFASC, ALMS1, GAS7, ERBB2IP, ANTXR1, MYH10	1149	153	4909	1.45206	0.999968	0.190445	5.15101
GOTERM_BP_FAT	GO:0048666~neuron development	44	2.90237	0.00802929	NRP2, S100A6, IRX5, NRP1, ATL1, ERBB2, CLU, STRN, ABI2, HPRT1, PRKG1, ALCAM, CD44, UNC5B, ILK, SEMA3B, AGRN, ROBO3, SPON2, APC, ACTB, KLF7, IL6, STMN3, EFNB3, CREB1, MAP1B, ITGA1, NFASC, NTNG1, PRKCI, ALMS1, GAS7, VASP, FARP2, SLIT3, HES1, ADM, VCAN, PBX3, DST, NTM, NGF, MYH10	1149	131	4909	1.43501	1	0.331445	13.765
GOTERM_BP_FAT	GO:0000904~cell morphogenesis involved in differentiation	35	2.30871	0.00825113	NRP2, S100A4, S100A6, NRP1, ATL1, ERBB2, HPRT1, TGFB1, ALCAM, DAB2, UNC5B, ILK, SEMA3B, ROBO3, SPON2, NFATC1, APC, FN1, ACTB, KLF7, EFNB3, CREB1, MAP1B, NTNG1, NFASC, MYH9, VASP, SLIT3, HES1, HIF1A, VCAN, ANTXR1, LAMC1, DST, MYH10	1149	99	4909	1.51045	1	0.335113	14.1186
GOTERM_BP_FAT	GO:0031175~neuron projection development	36	2.37467	0.0105041	NRP2, S100A6, NRP1, ATL1, ERBB2, CLU, STRN, ABI2, HPRT1, PRKG1, ALCAM, CD44, UNC5B, ILK, SEMA3B, ROBO3, SPON2, APC, ACTB, KLF7, IL6, EFNB3, STMN3, CREB1, MAP1B, ITGA1, NTNG1, NFASC, GAS7, VASP, SLIT3, ADM, VCAN, DST, NGF, MYH10	1149	104	4909	1.47891	1	0.370656	17.6326
GOTERM_BP_FAT	GO:0048812~neuron projection morphogenesis	29	1.91293	0.0275482	NRP2, S100A6, NRP1, ATL1, ERBB2, CLU, HPRT1, ALCAM, UNC5B, ILK, SEMA3B, ROBO3, SPON2, APC, ACTB, KLF7, EFNB3, CREB1, MAP1B, ITGA1, NTNG1, NFASC, GAS7, VASP, SLIT3, ADM, VCAN, DST, MYH10	1149	85	4909	1.45765	1	0.55519	40.1401
GOTERM_BP_FAT	GO:0048858~cell projection morphogenesis	32	2.11082	0.068501	NRP2, S100A6, NRP1, ATL1, ERBB2, CLU, HPRT1, TTLL3, ALCAM, UNC5B, ILK, SEMA3B, ROBO3, SPON2, APC, ACTB, KLF7, EFNB3, CREB1, MAP1B, ITGA1, NTNG1, RPGRIP1L, NFASC, ALMS1, GAS7, VASP, SLIT3, ADM, VCAN, DST, MYH10	1149	103	4909	1.32735	1	0.769271	72.8432
GOTERM_BP_FAT	GO:0007411~axon guidance	14	0.923483	0.0711394	NRP2, KLF7, NRP1, EFNB3, ERBB2, NFASC, VASP, SLIT3, ALCAM, UNC5B, SEMA3B, ROBO3, SPON2, MYH10	1149	37	4909	1.61659	1	0.774821	74.222
GOTERM_BP_FAT	GO:0032990~cell part morphogenesis	32	2.11082	0.0947054	NRP2, S100A6, NRP1, ATL1, ERBB2, CLU, HPRT1, TTLL3, ALCAM, UNC5B, ILK, SEMA3B, ROBO3, SPON2, APC, ACTB, KLF7, EFNB3, CREB1, MAP1B, ITGA1, NTNG1, RPGRIP1L, NFASC, ALMS1, GAS7, VASP, SLIT3, ADM, VCAN, DST, MYH10	1149	106	4909	1.28978	1	0.834355	83.9221
GOTERM_BP_FAT	GO:0048667~cell morphogenesis involved in neuron differentiation	25	1.64908	0.103066	NRP2, S100A6, NRP1, ATL1, ERBB2, HPRT1, ALCAM, UNC5B, SEMA3B, ROBO3, SPON2, APC, ACTB, KLF7, EFNB3, CREB1, MAP1B, NFASC, NTNG1, VASP, SLIT3, HES1, VCAN, DST, MYH10	1149	80	4909	1.33513	1	0.850249	86.4417
GOTERM_BP_FAT	GO:0007409~axonogenesis	23	1.51715	0.138783	ACTB, NRP2, S100A6, KLF7, NRP1, EFNB3, ATL1, CREB1, ERBB2, MAP1B, NFASC, NTNG1, VASP, SLIT3, ALCAM, UNC5B, SEMA3B, VCAN, ROBO3, SPON2, DST, MYH10, APC	1149	75	4909	1.31021	1	0.896375	93.5729
Annotation Cluster 30	Enrichment Score: 1.8953447345887096
Category	Term	Count	%	PValue	Genes	List Total	Pop Hits	Pop Total	Fold Enrichment	Bonferroni	Benjamini	FDR
SP_PIR_KEYWORDS	guanine-nucleotide releasing factor	23	1.51715	0.000195045	RALGPS2, ABR, MADD, PSD3, AKAP13, TRIO, CYTH3, DOCK5, VAV2, ARHGEF12, ECT2, ARFGEF1, FARP1, ARHGEF10, RGL2, RIC8A, FARP2, PLEKHG4, DOCK1, TIAM1, DOCK10, NET1, FGD4	1436	47	6373	2.1718	0.112702	0.00596086	0.288522
GOTERM_MF_FAT	GO:0005085~guanyl-nucleotide exchange factor activity	24	1.58311	0.00118117	RALGPS2, ABR, MADD, PSD3, AKAP13, TRIO, CYTH3, DOCK5, VAV2, ARHGEF12, ECT2, ARFGEF1, FARP1, ARHGEF10, RGL2, RIC8A, FARP2, PLEKHG4, DOCK1, TIAM1, RIN2, DOCK10, NET1, FGD4	1081	54	4649	1.9114	0.711235	0.0849024	1.86161
GOTERM_MF_FAT	GO:0005088~Ras guanyl-nucleotide exchange factor activity	17	1.12137	0.00188812	ABR, MADD, AKAP13, TRIO, VAV2, ARHGEF12, ECT2, ARHGEF10, FARP1, RGL2, FARP2, PLEKHG4, TIAM1, RIN2, DOCK10, NET1, FGD4	1081	34	4649	2.15032	0.862796	0.124026	2.96022
GOTERM_MF_FAT	GO:0030695~GTPase regulator activity	55	3.62797	0.00216624	MLPH, TBC1D19, IQGAP1, ARL2BP, RGL2, ARHGAP21, ARHGAP22, TBC1D17, TIAM1, DOCK10, NET1, RALBP1, MADD, PSD3, ARHGAP24, ARHGEF12, ECT2, ANXA2P3, ARHGEF10, FARP1, ANXA2P2, RIC8A, FARP2, ARHGAP31, MAP4K5, SIPA1L1, RIN2, RIN1, SRGAP1, RIN3, RALGPS2, ASAP2, AKAP13, ASAP1, CYTH3, ARFGEF1, RASAL2, PLEKHG4, DOCK1, RASA3, RASA4, FGD4, TBC1D2, GDI1, ABR, TRIO, DOCK5, VAV2, RACGAP1, ANXA2, RABEP2, RGS3, RGS4,…	1081	163	4649	1.45114	0.897633	0.125471	3.38927
GOTERM_MF_FAT	GO:0005089~Rho guanyl-nucleotide exchange factor activity	14	0.923483	0.00389048	ABR, AKAP13, TRIO, VAV2, ARHGEF12, ECT2, ARHGEF10, FARP1, FARP2, PLEKHG4, TIAM1, DOCK10, FGD4, NET1	1081	27	4649	2.22997	0.983375	0.20356	6.00972
GOTERM_MF_FAT	GO:0060589~nucleoside-triphosphatase regulator activity	55	3.62797	0.00448974	MLPH, TBC1D19, IQGAP1, ARL2BP, RGL2, ARHGAP21, ARHGAP22, TBC1D17, TIAM1, DOCK10, NET1, RALBP1, MADD, PSD3, ARHGAP24, ARHGEF12, ECT2, ANXA2P3, ARHGEF10, FARP1, ANXA2P2, RIC8A, FARP2, ARHGAP31, MAP4K5, SIPA1L1, RIN2, RIN1, SRGAP1, RIN3, RALGPS2, ASAP2, AKAP13, ASAP1, CYTH3, ARFGEF1, RASAL2, PLEKHG4, DOCK1, RASA3, RASA4, FGD4, TBC1D2, GDI1, ABR, TRIO, DOCK5, VAV2, RACGAP1, ANXA2, RABEP2, RGS3, RGS4,…	1081	168	4649	1.40795	0.991168	0.220352	6.90475
INTERPRO	IPR000219:Dbl homology (DH) domain	13	0.85752	0.00758126	PLEKHG4, ABR, TIAM1, TRIO, AKAP13, ARHGEF12, VAV2, ECT2, FARP1, ARHGEF10, FARP2, NET1, FGD4	1342	26	5842	2.1766	0.999998	0.351148	12.0944
UP_SEQ_FEATURE	domain:DH	12	0.791557	0.0137636	PLEKHG4, ABR, TIAM1, AKAP13, ARHGEF12, VAV2, ECT2, FARP1, ARHGEF10, FARP2, NET1, FGD4	1436	25	6370	2.12925	1	0.702226	22.6215
INTERPRO	IPR001331:Guanine-nucleotide dissociation stimulator, CDC24, conserved site	12	0.791557	0.0158232	PLEKHG4, ABR, TIAM1, TRIO, AKAP13, ARHGEF12, VAV2, ECT2, FARP1, ARHGEF10, FARP2, NET1	1342	25	5842	2.08954	1	0.496135	23.6749
GOTERM_BP_FAT	GO:0035023~regulation of Rho protein signal transduction	18	1.18734	0.0165696	ABR, STMN3, RALBP1, AKAP13, TRIO, CDH2, LPAR1, VAV2, ARHGEF12, ECT2, FARP1, ARHGEF10, FARP2, PLEKHG4, TIAM1, ARAP1, NET1, FGD4	1149	44	4909	1.7478	1	0.461742	26.4301
SMART	SM00325:RhoGEF	13	0.85752	0.031795	PLEKHG4, ABR, TIAM1, TRIO, AKAP13, ARHGEF12, VAV2, ECT2, FARP1, ARHGEF10, FARP2, NET1, FGD4	863	26	3133	1.81518	0.999981	0.515082	35.547
GOTERM_BP_FAT	GO:0051056~regulation of small GTPase mediated signal transduction	34	2.24274	0.0350431	ERBB2, ASAP2, ASAP1, AKAP13, LPAR1, CYTH3, CDH2, TBC1D19, ARFGEF1, IQGAP1, RGL2, RASAL2, PLEKHG4, S1PR1, TBC1D17, TIAM1, RASA3, RASA4, NET1, FGD4, TBC1D2, ABR, STMN3, RALBP1, PSD3, TRIO, ARHGEF12, VAV2, ECT2, ARHGEF10, FARP1, FARP2, SIPA1L1, ARAP1	1149	105	4909	1.38345	1	0.616066	48.071
GOTERM_MF_FAT	GO:0005083~small GTPase regulator activity	36	2.37467	0.0388636	MLPH, ASAP2, ASAP1, AKAP13, CYTH3, TBC1D19, ARFGEF1, IQGAP1, ARL2BP, RGL2, RASAL2, PLEKHG4, TBC1D17, TIAM1, DOCK10, NET1, FGD4, TBC1D2, GDI1, ABR, RALBP1, MADD, PSD3, TRIO, ARHGEF12, VAV2, ECT2, ARHGEF10, ANXA2P3, FARP1, FARP2, ANXA2, ANXA2P2, MAP4K5, RIN2, CDC42BPA, ARAP1	1081	114	4649	1.3581	1	0.665905	46.7544
GOTERM_BP_FAT	GO:0046578~regulation of Ras protein signal transduction	28	1.84697	0.0781109	ERBB2, ASAP2, ASAP1, AKAP13, LPAR1, CYTH3, CDH2, TBC1D19, ARFGEF1, PLEKHG4, S1PR1, TBC1D17, TIAM1, NET1, FGD4, TBC1D2, ABR, STMN3, RALBP1, PSD3, TRIO, VAV2, ARHGEF12, ECT2, ARHGEF10, FARP1, FARP2, ARAP1	1149	89	4909	1.34413	1	0.795968	77.5537
GOTERM_BP_FAT	GO:0008624~induction of apoptosis by extracellular signals	15	0.989446	0.146487	ABR, AKAP13, TRIO, VAV2, ARHGEF12, ECT2, TIMP3, MAGED1, VDR, AHRR, TIAM1, FAS, NGF, FGD4, NET1	1149	45	4909	1.42414	1	0.904979	94.5509
UP_SEQ_FEATURE	domain:PH 2	7	0.461741	0.16418	MYO10, TIAM1, TRIO, FARP1, ARAP1, FARP2, FGD4	1436	17	6370	1.82656	1	0.999184	96.3799
UP_SEQ_FEATURE	domain:PH 1	7	0.461741	0.16418	MYO10, TIAM1, TRIO, FARP1, ARAP1, FARP2, FGD4	1436	17	6370	1.82656	1	0.999184	96.3799
Annotation Cluster 31	Enrichment Score: 1.8657316187543942
Category	Term	Count	%	PValue	Genes	List Total	Pop Hits	Pop Total	Fold Enrichment	Bonferroni	Benjamini	FDR
GOTERM_MF_FAT	GO:0005540~hyaluronic acid binding	8	0.527704	0.000229564	HAPLN1, TNFAIP6, HAPLN3, CD44, LAYN, ACAN, VCAN, HMMR	1081	8	4649	4.30065	0.214394	0.0297121	0.36438
INTERPRO	IPR000538:Link	6	0.395778	0.00307665	HAPLN1, TNFAIP6, HAPLN3, CD44, ACAN, VCAN	1342	6	5842	4.3532	0.995614	0.210268	5.08563
SMART	SM00445:LINK	6	0.395778	0.00723879	HAPLN1, TNFAIP6, HAPLN3, CD44, ACAN, VCAN	863	6	3133	3.63036	0.912933	0.294413	9.40402
INTERPRO	IPR016186:C-type lectin-like	9	0.593668	0.0101359	HAPLN1, THBD, HAPLN3, CD44, LAYN, ACAN, COLEC12, VCAN, CLEC11A	1342	15	5842	2.61192	1	0.410193	15.8498
SP_PIR_KEYWORDS	hyaluronic acid	4	0.263852	0.0379043	HAPLN1, HAPLN3, VCAN, HMMR	1436	4	6373	4.43802	1	0.301553	43.5818
UP_SEQ_FEATURE	domain:Link 1	4	0.263852	0.0379543	HAPLN1, HAPLN3, ACAN, VCAN	1436	4	6370	4.43593	1	0.905781	51.1302
UP_SEQ_FEATURE	domain:Link 2	4	0.263852	0.0379543	HAPLN1, HAPLN3, ACAN, VCAN	1436	4	6370	4.43593	1	0.905781	51.1302
UP_SEQ_FEATURE	domain:Ig-like V-type	7	0.461741	0.419204	HAPLN1, HAPLN3, PSG5, ACAN, VCAN, JAM3, SIRPA	1436	23	6370	1.35007	1	1	99.9957
Annotation Cluster 32	Enrichment Score: 1.8274932229104732
Category	Term	Count	%	PValue	Genes	List Total	Pop Hits	Pop Total	Fold Enrichment	Bonferroni	Benjamini	FDR
GOTERM_MF_FAT	GO:0030695~GTPase regulator activity	55	3.62797	0.00216624	MLPH, TBC1D19, IQGAP1, ARL2BP, RGL2, ARHGAP21, ARHGAP22, TBC1D17, TIAM1, DOCK10, NET1, RALBP1, MADD, PSD3, ARHGAP24, ARHGEF12, ECT2, ANXA2P3, ARHGEF10, FARP1, ANXA2P2, RIC8A, FARP2, ARHGAP31, MAP4K5, SIPA1L1, RIN2, RIN1, SRGAP1, RIN3, RALGPS2, ASAP2, AKAP13, ASAP1, CYTH3, ARFGEF1, RASAL2, PLEKHG4, DOCK1, RASA3, RASA4, FGD4, TBC1D2, GDI1, ABR, TRIO, DOCK5, VAV2, RACGAP1, ANXA2, RABEP2, RGS3, RGS4,…	1081	163	4649	1.45114	0.897633	0.125471	3.38927
GOTERM_MF_FAT	GO:0060589~nucleoside-triphosphatase regulator activity	55	3.62797	0.00448974	MLPH, TBC1D19, IQGAP1, ARL2BP, RGL2, ARHGAP21, ARHGAP22, TBC1D17, TIAM1, DOCK10, NET1, RALBP1, MADD, PSD3, ARHGAP24, ARHGEF12, ECT2, ANXA2P3, ARHGEF10, FARP1, ANXA2P2, RIC8A, FARP2, ARHGAP31, MAP4K5, SIPA1L1, RIN2, RIN1, SRGAP1, RIN3, RALGPS2, ASAP2, AKAP13, ASAP1, CYTH3, ARFGEF1, RASAL2, PLEKHG4, DOCK1, RASA3, RASA4, FGD4, TBC1D2, GDI1, ABR, TRIO, DOCK5, VAV2, RACGAP1, ANXA2, RABEP2, RGS3, RGS4,…	1081	168	4649	1.40795	0.991168	0.220352	6.90475
GOTERM_MF_FAT	GO:0005096~GTPase activator activity	31	2.04485	0.0324692	ASAP2, ASAP1, TBC1D19, ARFGEF1, IQGAP1, RASAL2, ARHGAP21, ARHGAP22, DOCK1, TBC1D17, RASA3, RASA4, TBC1D2, GDI1, ABR, RALBP1, ARHGAP24, ARHGEF12, RACGAP1, RIC8A, ARHGAP31, RABEP2, RGS3, SIPA1L1, RGS4, RIN2, RIN1, SH3BP1, SRGAP1, ARAP1, RIN3	1081	94	4649	1.4183	1	0.628863	40.834
GOTERM_MF_FAT	GO:0008047~enzyme activator activity	43	2.83641	0.0367175	CXCL1, ASAP2, ASAP1, LTC4S, TBC1D19, SEC14L2, ARFGEF1, IQGAP1, ARHGAP21, RASAL2, ARHGAP22, DOCK1, TBC1D17, NRG1, RASA3, RASA4, FN1, TBC1D2, GDI1, ABR, RALBP1, MADD, MALT1, RACGAP1, ARHGEF12, MMP14, BCL2L13, ARHGAP24, NLRP1, RIC8A, ARHGAP31, RABEP2, RGS3, SIPA1L1, RGS4, RIN2, RIN1, PPP2R4, SH3BP1, IGFBP3, SRGAP1, ARAP1, RIN3	1081	140	4649	1.32091	1	0.654445	44.8322
SP_PIR_KEYWORDS	GTPase activation	24	1.58311	0.0628435	GDI1, ABR, RALBP1, ASAP2, ASAP1, ARHGAP24, TBC1D19, RACGAP1, ARHGEF12, ARHGAP21, RASAL2, ARHGAP31, ARHGAP22, TBC1D17, SIPA1L1, RIN2, RIN1, SH3BP1, RASA3, RASA4, ARAP1, SRGAP1, TBC1D2, RIN3	1436	75	6373	1.42017	1	0.420172	61.7647
Annotation Cluster 33	Enrichment Score: 1.813498114611469
Category	Term	Count	%	PValue	Genes	List Total	Pop Hits	Pop Total	Fold Enrichment	Bonferroni	Benjamini	FDR
GOTERM_MF_FAT	GO:0017124~SH3 domain binding	22	1.45119	0.000907414	ENAH, ADAM10, BAIAP2L2, FUT8, BCAR1, ABI2, PTTG1, SIRPA, CD2AP, VASP, ARHGAP31, CCDC6, PLSCR1, DOCK1, ILK, SH3KBP1, SYNJ2, MICAL1, ADAM19, SH3BP1, ADAM12, ADAM9	1081	47	4649	2.01307	0.614851	0.0707656	1.43306
SP_PIR_KEYWORDS	sh3-binding	15	0.989446	0.00602949	ENAH, ADAM10, FUT8, BCAR1, PTTG1, SIRPA, CD2AP, VASP, CCDC6, PLSCR1, DOCK1, SH3KBP1, ADAM19, SH3BP1, ADAM12	1436	32	6373	2.08032	0.975455	0.0978546	8.56872
UP_SEQ_FEATURE	short sequence motif:SH3-binding	10	0.659631	0.0888384	CCDC6, ADAM10, FUT8, BCAR1, PNRC1, PTTG1, ADAM19, SH3BP1, CD2AP, SIRPA	1436	25	6370	1.77437	1	0.989212	82.1219
GOTERM_MF_FAT	GO:0019904~protein domain specific binding	43	2.83641	0.114636	ENAH, YWHAZ, TLN1, FUT8, BCAR1, STRN, CBX3, ABI2, PTTG1, LPAR1, CD2AP, DOCK1, HAND2, ILK, SHISA5, SYNJ2, TAF9, MICAL1, TUBA1A, ADAM9, ADAM10, BAIAP2L2, STMN3, NDFIP1, NDFIP2, LDB2, ZNF521, TACC3, SIRPA, NLRP1, VASP, PLSCR1, CCDC6, ARHGAP31, TJP1, YWHAH, SH3KBP1, CALM3, ID3, ADAM19, SH3BP1, ADAM12, CALM2, CALM1, SHCBP1	1081	152	4649	1.21663	1	0.881491	85.5707
Annotation Cluster 34	Enrichment Score: 1.7691639420052379
Category	Term	Count	%	PValue	Genes	List Total	Pop Hits	Pop Total	Fold Enrichment	Bonferroni	Benjamini	FDR
INTERPRO	IPR016060:Complement control module	13	0.85752	0.000396538	PLAT, MASP1, SRPX2, SNED1, PAPPA, SUSD1, PAMR1, SUSD2, ACAN, VCAN, SUSD3, CSMD2, FN1	1342	20	5842	2.82958	0.502838	0.0674979	0.66957
SP_PIR_KEYWORDS	sushi	11	0.725594	0.0023513	MASP1, SRPX2, SNED1, PAPPA, SUSD1, PAMR1, SUSD2, ACAN, VCAN, SUSD3, CSMD2	1436	18	6373	2.71212	0.763793	0.0440935	3.42689
INTERPRO	IPR000436:Sushi/SCR/CCP	11	0.725594	0.00273869	MASP1, SRPX2, SNED1, PAPPA, SUSD1, PAMR1, SUSD2, ACAN, VCAN, SUSD3, CSMD2	1342	18	5842	2.66029	0.992031	0.205549	4.53913
SMART	SM00032:CCP	11	0.725594	0.0109806	MASP1, SRPX2, SNED1, PAPPA, SUSD1, PAMR1, SUSD2, ACAN, VCAN, SUSD3, CSMD2	863	18	3133	2.21855	0.97552	0.337816	13.9373
UP_SEQ_FEATURE	domain:Sushi 1	6	0.395778	0.0786919	MASP1, SRPX2, PAPPA, SUSD1, PAMR1, CSMD2	1436	11	6370	2.4196	1	0.985874	78.0558
UP_SEQ_FEATURE	domain:Sushi 2	6	0.395778	0.0786919	MASP1, SRPX2, PAPPA, SUSD1, PAMR1, CSMD2	1436	11	6370	2.4196	1	0.985874	78.0558
UP_SEQ_FEATURE	domain:Sushi	5	0.329815	0.0823082	SNED1, SUSD2, ACAN, VCAN, SUSD3	1436	8	6370	2.77246	1	0.986298	79.5961
UP_SEQ_FEATURE	domain:Sushi 3	3	0.197889	0.491611	SRPX2, PAPPA, CSMD2	1436	7	6370	1.90111	1	1	99.9996
Annotation Cluster 35	Enrichment Score: 1.6742808381059306
Category	Term	Count	%	PValue	Genes	List Total	Pop Hits	Pop Total	Fold Enrichment	Bonferroni	Benjamini	FDR
GOTERM_CC_FAT	GO:0044427~chromosomal part	57	3.75989	0.00474264	MORF4L1, MAD1L1, KIF22, XPO1, HIST4H4, HMGN2, KNTC1, CBX3, HIST2H4A, CBX6, HIST2H4B, MCM7, HIST1H2BL, HIST1H2BI, PRIM2, STAG1, HIST1H1D, HIST1H1B, DSN1, HIST1H1A, MCM2, HMGA2, HMGA1, JUNB, CDK2, DCTN1, NCAPD2, RFC3, MAD2L1, ZMIZ2, ZWINT, HIST2H2BF, DSCC1, HIST1H4L, HIST1H4K, HIST1H2AG, RPA3, SPC24, VDR, NCAPH, ACD, HIST1H4A, HIST1H4B, NCAPG, CENPA, JUND, HIST1H4E, HIST1H4F, HIST1H4C, HIST1H4D, HI…	1059	178	4615	1.3955	0.923608	0.0654413	6.68756
GOTERM_CC_FAT	GO:0005694~chromosome	64	4.22164	0.00826898	MORF4L1, XPO1, HMGN2, KNTC1, CBX3, CBX6, HIST1H2BL, HIST1H2BI, PRIM2, STAG1, DCTN1, JUNB, NCAPD2, RFC3, MAD2L1, ZWINT, ADD3, DSCC1, HMGB1, HMGB2, HIST1H4L, HIST1H4K, SPC24, VDR, ACD, HIST1H4A, HIST1H4B, JUND, HIST1H4E, HIST1H4F, HIST1H4C, HIST1H4D, HIST1H4I, HIST1H4J, HIST1H4H, HIST2H3A, HIST1H3J, SMG6, JRKL, CASC5, SUGT1, HIST2H3C, HIST2H3D, HIST1H3A, HIST1H3B, HIST1H3C, HIST1H3D, TMPO, HIST1H3E…	1059	209	4615	1.33447	0.988803	0.0970549	11.3874
SP_PIR_KEYWORDS	chromosomal protein	25	1.64908	0.0132108	HIST4H4, HMGN2, HIST2H4A, HIST2H4B, HIST1H2BL, FANCI, HIST1H2BI, HIST1H1D, HIST1H1B, HIST1H1A, HMGA2, HMGA1, HIST2H2BF, HMGB1, HMGB2, HIST1H4L, HIST1H4K, HIST1H2AG, ACD, HIST1H4A, HIST1H4B, CENPA, HIST1H4E, HIST1H4F, HIST1H4C, HIST1H4D, HIST1H4I, HIST1H4J, HIST1H4H, HIST2H3A, CENPN, HIST1H3J, CENPM, HIST1H2BC, SMG6, HIST1H2BE, HIST1H2BF, HIST1H2BG, CENPF, BIRC5, HIST2H3C, CENPH, HIST2H3D, HIST1H3…	1436	69	6373	1.60798	0.999712	0.162406	17.8801
GOTERM_CC_FAT	GO:0000785~chromatin	30	1.97889	0.0262618	MORF4L1, KIF22, HIST4H4, HMGN2, CBX3, HIST2H4A, CBX6, HIST2H4B, MCM7, HIST1H2BL, HIST1H2BI, STAG1, HIST1H1D, HIST1H1B, HIST1H1A, MCM2, HMGA2, HMGA1, JUNB, HIST2H2BF, DSCC1, HIST1H4L, HIST1H4K, HIST1H2AG, VDR, HIST1H4A, CENPA, HIST1H4B, JUND, HIST1H4E, HIST1H4F, HIST1H4C, HIST1H4D, HIST1H4I, HIST1H4J, CHD3, HIST1H4H, HIST2H3A, HIST1H3J, HIST1H2BC, HIST1H2BE, HIST1H2BF, CREB1, HIST1H2BG, CENPF, HIS…	1059	90	4615	1.45263	0.999999	0.250201	32.1235
GOTERM_BP_FAT	GO:0051276~chromosome organization	53	3.49604	0.312514	BMI1, MORF4L1, KIFC1, HIST4H4, HMGN2, CBX3, PTTG1, HIST2H4A, CBX6, HIST2H4B, HIST1H2BL, HIST1H2BI, SUPT5H, TOP2A, BRCC3, HIST1H1D, HIST1H1B, HIST1H1A, NUSAP1, MCM2, HMGA2, HMGA1, NCAPD2, MAD2L1, ZWINT, HIST2H2BF, PELO, PAF1, DSCC1, HMGB1, HMGB2, HIST1H4L, HIST1H4K, HIST1H2AG, TRRAP, NCAPH, ACD, TSPYL2, HIST1H4A, HIST1H4B, NCAPG, CENPA, HIST1H4E, HIST1H4F, HIST1H4C, TAF9, HIST1H4D, HIST1H4I, BCOR,…	1149	208	4909	1.08864	1	0.982303	99.8975
Annotation Cluster 36	Enrichment Score: 1.6357051108840321
Category	Term	Count	%	PValue	Genes	List Total	Pop Hits	Pop Total	Fold Enrichment	Bonferroni	Benjamini	FDR
COG_ONTOLOGY	Cytoskeleton	7	0.461741	0.00789306	MYO5A, TAGLN, CNN2, CNN1, TAGLN2, TUBG2, PLS3	122	12	717	3.42828	0.230107	0.230107	6.68301
INTERPRO	IPR003096:SM22/calponin	6	0.395778	0.018895	TAGLN, LIMCH1, LMO7, CNN2, CNN1, TAGLN2	1342	8	5842	3.2649	1	0.526178	27.6114
INTERPRO	IPR000557:Calponin repeat	4	0.263852	0.0830409	TAGLN, CNN2, CNN1, TAGLN2	1342	5	5842	3.48256	1	0.887204	76.9721
Annotation Cluster 37	Enrichment Score: 1.6177240199818919
Category	Term	Count	%	PValue	Genes	List Total	Pop Hits	Pop Total	Fold Enrichment	Bonferroni	Benjamini	FDR
SP_PIR_KEYWORDS	collagen	22	1.45119	8.27552e-05	CTHRC1, COL21A1, COL13A1, AMACR, COLEC12, EMILIN2, MMP1, TIMP1, EMILIN1, PCOLCE2, C1QTNF6, COL14A1, COL7A1, C1QTNF3, COL6A3, CCBE1, COL1A2, COL6A2, COL12A1, COL6A1, SCARA3, COL1A1, COL8A1	1436	42	6373	2.32468	0.0494657	0.00281442	0.122512
INTERPRO	IPR008160:Collagen triple helix repeat	18	1.18734	0.000764384	CTHRC1, COL21A1, COL13A1, AMACR, COLEC12, EMILIN1, C1QTNF6, COL14A1, C1QTNF3, COL7A1, COL6A3, CCBE1, COL1A2, COL6A2, COL12A1, COL6A1, SCARA3, COL1A1, COL8A1	1342	35	5842	2.23879	0.740074	0.106206	1.28692
SP_PIR_KEYWORDS	trimer	11	0.725594	0.00130695	COL14A1, COL7A1, COL13A1, COL6A3, COL1A2, COL6A2, COL6A1, COL12A1, COL1A1, THBS1, THBS2	1436	17	6373	2.87166	0.551428	0.0315588	1.91856
GOTERM_CC_FAT	GO:0005581~collagen	12	0.791557	0.00746111	COL14A1, TNXB, COL7A1, COL13A1, LUM, COL6A3, COL1A2, COL6A1, COL12A1, COL1A1, LOX, COL8A1	1059	23	4615	2.27368	0.982605	0.0963289	10.3306
SP_PIR_KEYWORDS	hydroxylation	15	0.989446	0.00834263	LTBP1, MASP1, LTBP2, U2AF2, COL14A1, HIF1A, THBD, COL7A1, COL6A3, COL1A2, COL6A2, COL12A1, COL6A1, COL1A1, COL8A1	1436	33	6373	2.01728	0.994116	0.129595	11.6703
INTERPRO	IPR002035:von Willebrand factor, type A	13	0.85752	0.0108482	HMCN1, COL14A1, COL7A1, COL21A1, COL6A3, COL6A2, ITGA1, ITGA11, COL6A1, COL12A1, ANTXR2, ANTXR1, ITGB1	1342	27	5842	2.09599	1	0.422537	16.8695
SP_PIR_KEYWORDS	hydroxylysine	9	0.593668	0.0144757	COL14A1, COL7A1, COL13A1, COL6A3, COL1A2, COL6A2, COL6A1, COL12A1, COL1A1	1436	16	6373	2.49639	0.999869	0.160764	19.4256
UP_SEQ_FEATURE	domain:VWFA 2	6	0.395778	0.0174294	COL14A1, COL7A1, COL6A3, COL6A2, COL6A1, COL12A1	1436	8	6370	3.32695	1	0.762792	27.774
UP_SEQ_FEATURE	domain:VWFA 1	6	0.395778	0.0174294	COL14A1, COL7A1, COL6A3, COL6A2, COL6A1, COL12A1	1436	8	6370	3.32695	1	0.762792	27.774
SP_PIR_KEYWORDS	triple helix	9	0.593668	0.0220436	COL14A1, COL7A1, COL13A1, COL6A3, COL1A2, COL6A2, COL6A1, COL12A1, COL1A1	1436	17	6373	2.34954	0.999999	0.203662	28.1202
GOTERM_CC_FAT	GO:0030934~anchoring collagen	5	0.329815	0.0276007	COL14A1, COL7A1, COL6A3, COL6A1, COL12A1	1059	6	4615	3.63157	1	0.256882	33.4698
SP_PIR_KEYWORDS	hydroxyproline	9	0.593668	0.0320205	COL14A1, COL7A1, COL13A1, COL6A3, COL1A2, COL6A2, COL6A1, COL12A1, COL1A1	1436	18	6373	2.21901	1	0.271423	38.2493
UP_SEQ_FEATURE	domain:VWFA 3	4	0.263852	0.0379543	COL6A3, COL6A2, COL6A1, COL12A1	1436	4	6370	4.43593	1	0.905781	51.1302
SMART	SM00327:VWA	13	0.85752	0.0433201	HMCN1, COL14A1, COL7A1, COL21A1, COL6A3, COL6A2, ITGA1, ITGA11, COL6A1, COL12A1, ANTXR2, ANTXR1, ITGB1	863	27	3133	1.74795	1	0.583267	45.2296
SP_PIR_KEYWORDS	pyroglutamic acid	7	0.461741	0.0510224	CCL2, COL6A3, COL1A2, COL6A2, COL6A1, COL1A1, FN1	1436	13	6373	2.3897	1	0.36784	53.9635
UP_SEQ_FEATURE	glycosylation site:O-linked (Gal...)	4	0.263852	0.0790948	COL14A1, COL7A1, COL6A3, COL1A1	1436	5	6370	3.54875	1	0.984544	78.2326
PIR_SUPERFAMILY	PIRSF002259:collagen VI	3	0.197889	0.135077	COL6A3, COL6A2, COL6A1	619	3	2678	4.32633	1	1	88.3793
OMIM_DISEASE	Ullrich congenital muscular dystrophy	3	0.197889	0.151908	COL6A3, COL6A2, COL6A1	287	3	1161	4.0453	1	1	90.9134
OMIM_DISEASE	Bethlem myopathy	3	0.197889	0.151908	COL6A3, COL6A2, COL6A1	287	3	1161	4.0453	1	1	90.9134
UP_SEQ_FEATURE	domain:VWFA	7	0.461741	0.201996	HMCN1, COL21A1, ITGA1, ITGA11, ANTXR2, ANTXR1, ITGB1	1436	18	6370	1.72509	1	0.9997	98.4632
UP_SEQ_FEATURE	region of interest:Triple-helical region	5	0.329815	0.276257	COL7A1, COL6A3, COL6A2, COL6A1, COL1A1	1436	12	6370	1.84831	1	0.999963	99.7479
SP_PIR_KEYWORDS	cell binding	4	0.263852	0.465746	COL6A3, COL6A2, COL6A1, LAMC1	1436	11	6373	1.61383	1	0.930651	99.9907
Annotation Cluster 38	Enrichment Score: 1.614305967940754
Category	Term	Count	%	PValue	Genes	List Total	Pop Hits	Pop Total	Fold Enrichment	Bonferroni	Benjamini	FDR
UP_SEQ_FEATURE	domain:Ig-like C2-type 4	12	0.791557	0.00266542	VCAM1, ICAM1, HMCN1, PDGFRA, NFASC, PTK7, ROBO3, NEO1, PALLD, BOC, MXRA5, MYLK	1436	21	6370	2.53482	0.999965	0.417402	4.81891
UP_SEQ_FEATURE	domain:Ig-like C2-type 5	10	0.659631	0.00350948	VCAM1, ICAM1, HMCN1, PDGFRA, NFASC, PTK7, ROBO3, PALLD, MXRA5, MYLK	1436	16	6370	2.77246	0.999999	0.459143	6.29854
UP_SEQ_FEATURE	domain:Ig-like C2-type 6	6	0.395778	0.0174294	VCAM1, HMCN1, NFASC, PTK7, MXRA5, MYLK	1436	8	6370	3.32695	1	0.762792	27.774
UP_SEQ_FEATURE	domain:Ig-like C2-type 7	5	0.329815	0.0259536	VCAM1, HMCN1, PTK7, MXRA5, MYLK	1436	6	6370	3.69661	1	0.851656	38.5292
UP_SEQ_FEATURE	domain:Ig-like C2-type 9	3	0.197889	0.220718	HMCN1, MXRA5, MYLK	1436	4	6370	3.32695	1	0.999823	99.0095
UP_SEQ_FEATURE	domain:Ig-like C2-type 8	3	0.197889	0.220718	HMCN1, MXRA5, MYLK	1436	4	6370	3.32695	1	0.999823	99.0095
Annotation Cluster 39	Enrichment Score: 1.5812167812602593
Category	Term	Count	%	PValue	Genes	List Total	Pop Hits	Pop Total	Fold Enrichment	Bonferroni	Benjamini	FDR
INTERPRO	IPR018979:FERM, N-terminal	11	0.725594	0.00460445	EPB41L2, TLN1, EZR, FRMD6, EPB41L1, FRMD4A, PTPN14, PTPN13, MSN, FARP1, FARP2	1342	19	5842	2.52028	0.999706	0.252051	7.51964
INTERPRO	IPR018980:FERM, C-terminal PH-like domain	9	0.593668	0.0101359	EPB41L2, EZR, FRMD6, EPB41L1, FRMD4A, PTPN13, MSN, FARP1, FARP2	1342	15	5842	2.61192	1	0.410193	15.8498
[truncated: 365 more rows]

## Sheet: group5_lateupreg
Annotation Cluster 1	Enrichment Score: 42.60886390871195
[truncated: 319 more rows]
