# Supplementary material for: Transcriptional Dynamics During Human Adipogenesis and Its Link to Adipose Morphology and Distribution
Source: Oxford University Press journal article supplement (doi:10.2337/db16-0631), 2016-11-01
Supplement: db160631supplementarydata7.xlsx [file db160631supplementarydata7.xlsx]

## Sheet: Table
Gene Symbol	Temporal pattern	Lipid accumulation, Fold change to Neg C (mean)	p-value lipid	Glycerol conc in medium (mean, µM)	p-value glyc
NegC	-	1	x	25.0263	x
PPARG	Up	0.616786	7.84042e-14	14.4502	1.00995e-10
CEBPA	Up	0.722202	0.0113361	12.6487	2.36192e-05
BCL6	Transient	0.777824	0.0791826	14.805	0.00047971
CREB3L1	Down	0.94346	1	16.8373	0.00733668
EPAS1	Up	1.2003	0.298807	30.5955	1
ESRRA	Up	1.13903	1	22.721	1
HAND2	Transient/Down	0.977736	1	21.9653	1
KLF4	Down	1.06387	1	29.8913	0.437832
KLF9	Down	0.950682	1	18.8267	0.104015
MESP1	Up	1.09175	1	23.8383	1
NFIL3	Transient	1.20345	0.161542	25.0593	1
NFKBIA	Down/Transient	1.10665	1	25.6703	1
NR4A1	Transient	0.924358	1	21.1227	1
PRRX1	Down	1.15484	1	37.324	3.3377e-05
SNAI2	Down	1.0907	1	24.0453	1
SOX4	Transient	0.73537	0.0132776	18.504	0.0895864
TSC22D3	Transient/Slightly up	1.03315	1	22.363	1
ZFP36L2	Transient	1.30007	0.00245438	46.2017	3.2632e-09
ZNF117	Up	1.0613	1	22.9337	1
ZNF503	Down	0.982639	1	21.427	1

## Sheet: Glyc Data
Plate	Well	Gene	GeneNr	Conc	Final.Well
Plate10	C8	BCL6	162	13.606	Plate10.C8		BCL6	14.805
Plate10	C9	BCL6	162	17.098	Plate10.C9		CEBPA	12.6487
Plate10	C10	BCL6	162	13.711	Plate10.C10		CREB3L1	16.8373
Plate10	B11	CEBPA	202	12.913	Plate10.B11		EPAS1	30.5955
Plate10	C11	CEBPA	202	12.474	Plate10.C11		ESRRA	22.721
Plate10	D11	CEBPA	202	12.559	Plate10.D11		HAND2	21.9653
Plate10	E8	CREB3L1	164	14.661	Plate10.E8		KLF4	29.8913
Plate10	E9	CREB3L1	164	16.503	Plate10.E9		KLF9	18.8267
Plate10	E10	CREB3L1	164	19.348	Plate10.E10		MESP1	23.8383
Plate10	B8	EPAS1	161	28.577	Plate10.B8		NegC	25.0263
Plate10	B9	EPAS1	161	32.614	Plate10.B9		NFIL3	25.0593
Plate10	B10	EPAS1	161	1.7306	Plate10.B10		NFKBIA	25.6703
Plate10	B2	ESRRA	152	23.943	Plate10.B2		NR4A1	21.1227
Plate10	B3	ESRRA	152	20.435	Plate10.B3		PPARG	14.4502
Plate10	B4	ESRRA	152	23.785	Plate10.B4		PRRX1	37.324
Plate10	G5	HAND2	160	23.48	Plate10.G5		SNAI2	24.0453
Plate10	G6	HAND2	160	19.704	Plate10.G6		SOX4	18.504
Plate10	G7	HAND2	160	22.712	Plate10.G7		TSC22D3	22.363
Plate10	G8	KLF4	166	27.167	Plate10.G8		ZFP36L2	46.2017
Plate10	G9	KLF4	166	31.618	Plate10.G9		ZNF117	22.9337
Plate10	G10	KLF4	166	30.889	Plate10.G10		ZNF503	21.427
Plate10	D8	KLF9	163	15.149	Plate10.D8
Plate10	D9	KLF9	163	20.224	Plate10.D9
Plate10	D10	KLF9	163	21.107	Plate10.D10
Plate10	C2	MESP1	153	27.478	Plate10.C2
Plate10	C3	MESP1	153	18.534	Plate10.C3
Plate10	C4	MESP1	153	25.503	Plate10.C4
Plate10	C5	Neg control	200	23.322	Plate10.C5
Plate10	C6	Neg control	200	22.607	Plate10.C6
Plate10	C7	Neg control	200	18.945	Plate10.C7
Plate10	F2	Neg control	200	28.43	Plate10.F2
Plate10	F3	Neg control	200	25.365	Plate10.F3
Plate10	F4	Neg control	200	27.573	Plate10.F4
Plate5	B5	Neg control	202	20.069	Plate5.B5
Plate5	B6	Neg control	202	24.105	Plate5.B6
Plate5	B7	Neg control	202	25.586	Plate5.B7
Plate5	G2	Neg control	202	29.97	Plate5.G2
Plate5	G3	Neg control	202	30.584	Plate5.G3
Plate5	G4	Neg control	202	28.144	Plate5.G4
Plate6	D5	Neg control	202	25.092	Plate6.D5
Plate6	D6	Neg control	202	24.12	Plate6.D6
Plate6	D7	Neg control	202	17.864	Plate6.D7
Plate6	F8	Neg control	202	22.794	Plate6.F8
Plate6	F9	Neg control	202	23.334	Plate6.F9
Plate6	F10	Neg control	202	26.572	Plate6.F10
Plate8	E8	Neg control	202	27.074	Plate8.E8
Plate8	E9	Neg control	202	25.013	Plate8.E9
Plate8	E10	Neg control	202	24.176	Plate8.E10
Plate8	F5	Neg control	202	28.688	Plate8.F5
Plate8	F6	Neg control	202	22.724	Plate8.F6
Plate8	F7	Neg control	202	28.481	Plate8.F7
Plate10	D2	NFIL3	154	24.567	Plate10.D2
Plate10	D3	NFIL3	154	24.719	Plate10.D3
Plate10	D4	NFIL3	154	25.892	Plate10.D4
Plate10	E2	NFKBIA	155	25.242	Plate10.E2
Plate10	E3	NFKBIA	155	26.135	Plate10.E3
Plate10	E4	NFKBIA	155	25.634	Plate10.E4
Plate6	F5	NR4A1	90	23.032	Plate6.F5
Plate6	F6	NR4A1	90	22.41	Plate6.F6
Plate6	F7	NR4A1	90	17.926	Plate6.F7
Plate10	D5	PPARG	201	13.814	Plate10.D5
Plate10	D6	PPARG	201	13.928	Plate10.D6
Plate10	D7	PPARG	201	12.878	Plate10.D7
Plate5	C5	PPARG	200	11.877	Plate5.C5
Plate5	C6	PPARG	200	13.352	Plate5.C6
Plate5	C7	PPARG	200	16.73	Plate5.C7
Plate6	G8	PPARG	200	12.815	Plate6.G8
Plate6	G9	PPARG	200	13.371	Plate6.G9
Plate6	G10	PPARG	200	15.709	Plate6.G10
Plate8	G5	PPARG	200	16.832	Plate8.G5
Plate8	G6	PPARG	200	15.797	Plate8.G6
Plate8	G7	PPARG	200	16.299	Plate8.G7
Plate5	B11	PRRX1	97	37.683	Plate5.B11
Plate5	C11	PRRX1	97	39.135	Plate5.C11
Plate5	D11	PRRX1	97	35.154	Plate5.D11
Plate10	G2	SNAI2	156	23.453	Plate10.G2
Plate10	G3	SNAI2	156	23.337	Plate10.G3
Plate10	G4	SNAI2	156	25.346	Plate10.G4
Plate8	C2	SOX4	117	15.855	Plate8.C2
Plate8	C3	SOX4	117	16.118	Plate8.C3
Plate8	C4	SOX4	117	23.539	Plate8.C4
Plate10	B5	TSC22D3	157	25.663	Plate10.B5
Plate10	B6	TSC22D3	157	19.961	Plate10.B6
Plate10	B7	TSC22D3	157	21.465	Plate10.B7
Plate10	E5	ZFP36L2	158	49.958	Plate10.E5
Plate10	E6	ZFP36L2	158	42.607	Plate10.E6
Plate10	E7	ZFP36L2	158	46.04	Plate10.E7
Plate10	F5	ZNF117	159	24.697	Plate10.F5
Plate10	F6	ZNF117	159	20.295	Plate10.F6
Plate10	F7	ZNF117	159	23.809	Plate10.F7
Plate10	F8	ZNF503	165	16.822	Plate10.F8
Plate10	F9	ZNF503	165	26.135	Plate10.F9
Plate10	F10	ZNF503	165	21.324	Plate10.F10

## Sheet: Bodipy FC
Final.Well	Bodipy_no_object	Bodipy_tot_intens	Hoechst_tot_area	Ratio_Bodipytot_intens/Hoechst_tot_area	Hoechst_no_objects	Bodipy_tot_area	Hoechst_Cell_no_objects	Hoechst_cell_tot_intens	Date	Plate	Gene.Symbol	FoldChange
Plate10.C10	1144	406991488	817899	497.606	2047	2.04273e+06	1503	370042464	20141113	Plate10	BCL6	0.687569		BCL6	0.777824
Plate10.C8	1107	388787296	878308	442.655	2189	1954552	1629	388911616	20141113	Plate10	BCL6	0.665331		CEBPA	0.722202
Plate10.C9	1095	368744256	748141	492.881	1991	1.899e+06	1450	335688640	20141113	Plate10	BCL6	0.658119		CREB3L1	0.94346
Plate10.C10	1346	917284672	1.71835e+06	533.817	3731	3659399	2677	620075264	20141204	Plate10	BCL6	0.897533		EPAS1	1.2003
Plate10.C8	1324	782287168	1411323	554.294	3427	3.27683e+06	2451	559527808	20141204	Plate10	BCL6	0.882863		ESRRA	1.13903
Plate10.C9	1313	719110592	1.46742e+06	490.052	3703	3105184	2689	554999488	20141204	Plate10	BCL6	0.875528		HAND2	0.977736
Plate10.B11	917	432843904	949897	455.675	1912	1.96875e+06	1438	400305216	20141113	Plate10	CEBPA	0.551137		KLF4	1.06387
Plate10.C11	964	409521472	920541	444.871	1978	1921896	1442	395764448	20141113	Plate10	CEBPA	0.579385		KLF9	0.950682
Plate10.D11	953	377798496	917397	411.816	2068	1822898	1514	366443520	20141113	Plate10	CEBPA	0.572774		MESP1	1.09175
Plate10.B11	1394	903091968	1.38325e+06	652.875	3172	3.84477e+06	2266	486025856	20141204	Plate10	CEBPA	0.92954		NegC	1
Plate10.C11	1212	802884608	1484178	540.962	3431	3.38818e+06	2516	563564544	20141204	Plate10	CEBPA	0.80818		NFIL3	1.20345
Plate10.D11	1338	799304384	1.31856e+06	606.193	2968	3.47957e+06	2134	495127904	20141204	Plate10	CEBPA	0.892198		NFKBIA	1.10665
Plate10.E10	1304	470633184	628508	748.811	1797	2.34211e+06	1294	255739056	20141113	Plate10	CREB3L1	0.783732		NR4A1	0.924358
Plate10.E8	1350	483664864	712756	678.584	2031	2374611	1468	274242400	20141113	Plate10	CREB3L1	0.811379		PPARG	0.616786
Plate10.E9	1215	423263648	696153	608.004	1942	2.09876e+06	1433	286765056	20141113	Plate10	CREB3L1	0.730241		PRRX1	1.15484
Plate10.E10	1762	951699584	1.58586e+06	600.115	3596	3.95504e+06	2585	581229632	20141204	Plate10	CREB3L1	1.17493		SNAI2	1.0907
Plate10.E8	1716	947019136	1.21213e+06	781.288	3292	3855380	2351	443468352	20141204	Plate10	CREB3L1	1.14425		SOX4	0.73537
Plate10.E9	1524	746948032	1.17907e+06	633.506	3256	3.36073e+06	2323	427537408	20141204	Plate10	CREB3L1	1.01623		TSC22D3	1.03315
Plate10.B10	3	15477	568987	0.0272	1914	272	1393	223356656	20141113	Plate10	EPAS1	0.00180307		ZFP36L2	1.30007
Plate10.B8	1902	849292288	802648	1058.11	2114	3.78353e+06	1528	405083968	20141113	Plate10	EPAS1	1.14314		ZNF117	1.0613
Plate10.B9	1825	791129856	755256	1047.5	2142	3.61886e+06	1571	297018240	20141113	Plate10	EPAS1	1.09686		ZNF503	0.982639
Plate10.B10	1939	1368827520	1.64162e+06	833.83	3710	5.12528e+06	2715	625887104	20141204	Plate10	EPAS1	1.29295
Plate10.B8	1848	1297939200	1.5443e+06	840.472	3623	5016641	2647	542643648	20141204	Plate10	EPAS1	1.23227
Plate10.B9	1854	1236200960	1.2121e+06	1019.88	3058	4.81698e+06	2206	449588032	20141204	Plate10	EPAS1	1.23627
Plate10.B2	1780	747297664	489050	1528.06	1683	3.50457e+06	1180	202920640	20141113	Plate10	ESRRA	1.06982
Plate10.B3	1774	790665472	754176	1048.38	2163	3.59986e+06	1595	423043104	20141113	Plate10	ESRRA	1.06621
Plate10.B4	1787	710084864	625171	1135.83	1807	3.29302e+06	1341	265076512	20141113	Plate10	ESRRA	1.07403
Plate10.B2	1930	1387155072	1.20185e+06	1154.18	3157	5372910	2208	446011424	20141204	Plate10	ESRRA	1.28695
Plate10.B3	1761	1346858496	1.34408e+06	1002.07	3325	5027938	2340	501122816	20141204	Plate10	ESRRA	1.17426
Plate10.B4	1744	1636591744	1.68522e+06	971.144	3790	5197813	2770	612977664	20141204	Plate10	ESRRA	1.16293
Plate10.G5	1310	538676480	616708	873.471	1644	2.67813e+06	1167	249920608	20141113	Plate10	HAND2	0.787338
Plate10.G6	1418	586252800	586308	999.906	1646	2.71096e+06	1169	286056672	20141113	Plate10	HAND2	0.852249
Plate10.G7	1380	597830720	657176	909.697	1876	2.82857e+06	1338	256622032	20141113	Plate10	HAND2	0.82941
Plate10.G5	1780	1255322496	1.43431e+06	875.21	3741	4.70562e+06	2655	554821056	20141204	Plate10	HAND2	1.18693
Plate10.G6	1670	1307517184	1.43717e+06	909.783	3507	4.57117e+06	2527	521581504	20141204	Plate10	HAND2	1.11358
Plate10.G7	1645	1261876608	1.57289e+06	802.268	3650	4426174	2696	633956544	20141204	Plate10	HAND2	1.09691
Plate10.G10	1758	861020544	678920	1268.22	1871	3759621	1365	280610944	20141113	Plate10	KLF4	1.0566
Plate10.G8	1666	756142784	663695	1139.29	1875	3.44181e+06	1364	263970880	20141113	Plate10	KLF4	1.0013
Plate10.G9	1677	815074624	770576	1057.75	2049	3.65255e+06	1483	312965184	20141113	Plate10	KLF4	1.00791
Plate10.G10	1661	1294702848	1.18236e+06	1095.02	3075	4.66667e+06	2161	419728480	20141204	Plate10	KLF4	1.10758
Plate10.G8	1652	1233743360	1.31635e+06	937.246	3417	4.41344e+06	2412	464255264	20141204	Plate10	KLF4	1.10158
Plate10.G9	1662	1286374656	1.26175e+06	1019.51	3364	4663690	2379	471861408	20141204	Plate10	KLF4	1.10825
Plate10.D10	1363	541719168	1.07707e+06	502.957	2393	2.55506e+06	1806	527014624	20141113	Plate10	KLF9	0.819193
Plate10.D8	1319	528019264	979629	538.999	2384	2506975	1801	387638688	20141113	Plate10	KLF9	0.792748
Plate10.D9	1400	505277408	867752	582.283	2145	2610615	1582	335508416	20141113	Plate10	KLF9	0.84143
Plate10.D10	1675	880646592	1556431	565.812	3741	3.92778e+06	2761	540219456	20141204	Plate10	KLF9	1.11691
Plate10.D8	1577	816376576	1.53328e+06	532.439	3741	3.58306e+06	2733	531730816	20141204	Plate10	KLF9	1.05157
Plate10.D9	1623	935659392	1.39013e+06	673.074	3194	3892472	2333	489871040	20141204	Plate10	KLF9	1.08224
Plate10.C2	1724	850692992	679827	1251.34	1824	3.68539e+06	1313	270735456	20141113	Plate10	MESP1	1.03616
Plate10.C3	1578	729942464	806072	905.555	2130	3.2427e+06	1541	342340480	20141113	Plate10	MESP1	0.948412
Plate10.C4	1689	792522944	872856	907.965	2094	3.47974e+06	1578	430515872	20141113	Plate10	MESP1	1.01513
Plate10.C2	1835	1459703808	1.62709e+06	897.125	3541	5.32463e+06	2547	636651520	20141204	Plate10	MESP1	1.22361
Plate10.C3	1742	1377769088	2.04515e+06	673.676	4148	4907973	3075	824526592	20141204	Plate10	MESP1	1.16159
Plate10.C4	1748	1214282624	1.46098e+06	831.141	3514	4.63754e+06	2525	534444192	20141204	Plate10	MESP1	1.16559
Plate10.C5	1553	664667776	727723	913.352	2107	3079186	1534	301064736	20141113	Plate10	Neg control	0.933387
Plate10.C6	1667	739101952	721720	1024.08	1992	3.36875e+06	1464	311192224	20141113	Plate10	Neg control	1.0019
Plate10.C7	1328	508520000	692887	733.915	1939	2.42723e+06	1404	279996512	20141113	Plate10	Neg control	0.798157
Plate10.F2	1871	890112320	853741	1042.6	2174	3.83545e+06	1608	356168864	20141113	Plate10	Neg control	1.12451
Plate10.F3	1715	707336640	589755	1199.37	1644	3.36839e+06	1189	285668064	20141113	Plate10	Neg control	1.03075
Plate10.F4	1849	819291456	799920	1024.22	2105	3671298	1532	353207296	20141113	Plate10	Neg control	1.11129
Plate10.C5	1714	1302791680	1.66912e+06	780.528	3906	4.64739e+06	2880	648257408	20141204	Plate10	Neg control	1.14292
Plate10.C6	1831	1317745408	1.53701e+06	857.342	3506	4863894	2505	552949504	20141204	Plate10	Neg control	1.22094
Plate10.C7	1854	1191438720	1.49101e+06	799.081	3560	4.67963e+06	2535	607501824	20141204	Plate10	Neg control	1.23627
Plate10.F2	7	6965	15256	0.45654	154	220	92	3752965	20141204	Plate10	Neg control	0.0046677
Plate10.F3	1861	1331830144	1.27615e+06	1043.63	3176	4.73176e+06	2231	469342240	20141204	Plate10	Neg control	1.24094
Plate10.F4	1731	1212670720	1.47495e+06	822.18	3565	4.5243e+06	2577	530890848	20141204	Plate10	Neg control	1.15426
Plate5.B5	1763	912595968	1.01188e+06	901.884	2406	3.80839e+06	1753	387800448	20141113	Plate5	Neg control	1.02282
Plate5.B6	1860	1015237376	1.05086e+06	966.103	2706	4.02709e+06	1988	435199840	20141113	Plate5	Neg control	1.07909
Plate5.B7	1731	903407360	1.16502e+06	775.446	2851	3.74357e+06	2079	481068192	20141113	Plate5	Neg control	1.00425
Plate5.G2	1856	1106096000	997256	1109.14	2429	4.12752e+06	1788	383327072	20141113	Plate5	Neg control	1.07677
Plate5.G3	1534	904566848	872500	1036.75	2332	3.6148e+06	1685	323159200	20141113	Plate5	Neg control	0.889963
Plate5.G4	1598	934839552	868148	1076.82	2286	3.65206e+06	1674	336454592	20141113	Plate5	Neg control	0.927093
Plate5.B5	1407	1010758592	1021678	989.312	2840	3.81236e+06	2018	444964896	20141204	Plate5	Neg control	0.843104
Plate5.B6	1690	1027844032	1.03752e+06	990.678	3114	4.07679e+06	2199	337336448	20141204	Plate5	Neg control	1.01268
Plate5.B7	1924	1322202496	1167206	1132.79	3034	4766001	2244	423951328	20141204	Plate5	Neg control	1.1529
Plate5.G2	1629	1309585152	1.2074e+06	1084.63	3271	4.40258e+06	2376	389084832	20141204	Plate5	Neg control	0.976131
Plate5.G3	1889	1281768704	1127769	1136.55	3252	4.66599e+06	2331	392218368	20141204	Plate5	Neg control	1.13193
Plate5.G4	1474	1112654976	1.05656e+06	1053.09	2908	3.86982e+06	2094	330960512	20141204	Plate5	Neg control	0.883252
Plate6.D5	1697	759208704	941004	806.807	2588	3.49487e+06	1921	375750816	20141113	Plate6	Neg control	1.04228
Plate6.D6	1680	734583744	742741	989.018	2059	3.40284e+06	1504	280563136	20141113	Plate6	Neg control	1.03184
Plate6.D7	1470	582971712	921496	632.636	2421	2.80975e+06	1783	407225952	20141113	Plate6	Neg control	0.902856
Plate6.F10	1661	700090496	844319	829.178	2089	3260284	1543	429033728	20141113	Plate6	Neg control	1.02017
Plate6.F8	1630	648522432	831388	780.048	2354	3.03135e+06	1773	348455808	20141113	Plate6	Neg control	1.00113
Plate6.F9	1631	649787840	817763	794.592	2161	3.06507e+06	1540	298177024	20141113	Plate6	Neg control	1.00174
Plate6.D5	1870	1274651136	1.64082e+06	776.836	3732	4658598	2772	645376704	20141204	Plate6	Neg control	0.98646
Plate6.D6	2082	1442352768	1.69295e+06	851.974	4042	5.14395e+06	3050	580931136	20141204	Plate6	Neg control	1.09829
Plate6.D7	1796	1215115008	1.69755e+06	715.807	3727	4536537	2761	611761408	20141204	Plate6	Neg control	0.947424
Plate6.F10	1923	1237685632	1.77216e+06	698.405	4217	4635588	3128	600816960	20141204	Plate6	Neg control	1.01442
Plate6.F8	1835	1267864448	1.75442e+06	722.671	4058	4.539e+06	3014	621554368	20141204	Plate6	Neg control	0.967997
Plate6.F9	1868	1395521664	1.67819e+06	831.565	3641	4912740	2675	639657728	20141204	Plate6	Neg control	0.985405
Plate8.E10	1553	395640544	1.40077e+06	282.444	3029	2.47007e+06	2235	543792256	20141113	Plate8	Neg control	0.991277
Plate8.E8	1642	367536512	1.45001e+06	253.472	3266	2.36205e+06	2444	550969792	20141113	Plate8	Neg control	1.04809
Plate8.E9	1438	335299552	1.45033e+06	231.189	3116	2.14444e+06	2270	552245696	20141113	Plate8	Neg control	0.917872
Plate8.F5	1612	408533536	1.44047e+06	283.611	3314	2.50173e+06	2451	544556224	20141113	Plate8	Neg control	1.02894
Plate8.F6	1580	378331840	1.57603e+06	240.054	3366	2.36693e+06	2535	646994560	20141113	Plate8	Neg control	1.00851
Plate8.F7	1575	357842592	1.35568e+06	263.958	3065	2.34714e+06	2300	502937568	20141113	Plate8	Neg control	1.00532
Plate8.E10	1677	1180795776	1.54297e+06	765.274	3884	4.29345e+06	2839	539708096	20141204	Plate8	Neg control	0.909518
Plate8.E8	1882	1300165504	1.4674e+06	886.034	3825	4.68016e+06	2783	540338112	20141204	Plate8	Neg control	1.0207
Plate8.E9	1948	1338984320	1501342	891.858	3855	4817704	2850	568747200	20141204	Plate8	Neg control	1.05649
Plate8.F5	1745	1283054464	1.75412e+06	731.452	3892	4.44892e+06	2889	621413632	20141204	Plate8	Neg control	0.946398
Plate8.F6	1907	1592315904	2.09177e+06	761.231	4348	5.00275e+06	3297	789725440	20141204	Plate8	Neg control	1.03426
Plate8.F7	1904	1359133952	1.47847e+06	919.281	3706	4.73441e+06	2735	536926208	20141204	Plate8	Neg control	1.03263
Plate10.D2	1859	707087488	653035	1082.77	1793	3.28256e+06	1306	358294016	20141113	Plate10	NFIL3	1.1173
Plate10.D3	1744	670091776	587520	1140.54	1834	3.19207e+06	1308	239704512	20141113	Plate10	NFIL3	1.04818
Plate10.D4	1853	708303936	586711	1207.25	1915	3.30663e+06	1350	262191712	20141113	Plate10	NFIL3	1.11369
Plate10.D2	2014	1228829312	1.29587e+06	948.265	3079	4991849	2168	470066464	20141204	Plate10	NFIL3	1.34297
Plate10.D3	1963	1369347584	1520352	900.678	3452	5.06917e+06	2488	607837504	20141204	Plate10	NFIL3	1.30896
Plate10.D4	1934	1262577024	1.42653e+06	885.071	3475	4888677	2496	521671776	20141204	Plate10	NFIL3	1.28962
Plate10.E2	1761	791166144	916790	862.975	2409	3.58044e+06	1736	391299328	20141113	Plate10	NFKBIA	1.0584
Plate10.E3	1714	774726080	661495	1171.17	1961	3.50392e+06	1389	285163616	20141113	Plate10	NFKBIA	1.03015
Plate10.E4	1698	717649600	674815	1063.48	1989	3.32581e+06	1410	260481472	20141113	Plate10	NFKBIA	1.02053
Plate10.E2	1753	1207803008	1.20985e+06	998.305	3077	4.71083e+06	2203	447079520	20141204	Plate10	NFKBIA	1.16893
Plate10.E3	1715	1269736960	2.0809e+06	610.186	4034	4.57324e+06	3019	834001984	20141204	Plate10	NFKBIA	1.14359
Plate10.E4	1827	1085572992	1.40078e+06	774.978	3487	4347533	2512	534570944	20141204	Plate10	NFKBIA	1.21827
Plate6.F5	1498	755464128	899889	839.508	2141	3239350	1604	350751840	20141113	Plate6	NR4A1	0.920053
Plate6.F6	1531	608495680	950372	640.271	2421	2882900	1809	391228032	20141113	Plate6	NR4A1	0.940321
Plate6.F7	1479	634604352	967825	655.701	2429	2.95759e+06	1820	371118592	20141113	Plate6	NR4A1	0.908384
Plate6.F5	1752	1274322688	1.78144e+06	715.331	3864	4.56756e+06	2881	613266880	20141204	Plate6	NR4A1	0.924213
Plate6.F6	1733	1211125248	1.94671e+06	622.139	4247	4.40238e+06	3215	666064256	20141204	Plate6	NR4A1	0.91419
Plate6.F7	1780	1327094400	1.79379e+06	739.828	4089	4518860	3043	669037248	20141204	Plate6	NR4A1	0.938984
Plate10.D5	931	368407616	717427	513.512	1963	1.84934e+06	1423	309780192	20141113	Plate10	PPARG	0.559551
Plate10.D6	942	399924416	786793	508.297	2123	1.9924e+06	1533	307240992	20141113	Plate10	PPARG	0.566162
Plate10.D7	836	360555520	892205	404.117	2187	1.74386e+06	1618	383167168	20141113	Plate10	PPARG	0.502454
Plate10.D5	1157	834217024	1.52803e+06	545.942	3302	3.31412e+06	2374	580971648	20141204	Plate10	PPARG	0.771505
Plate10.D6	1310	874071488	1.36988e+06	638.063	3477	3470378	2479	499349920	20141204	Plate10	PPARG	0.873527
Plate10.D7	1231	845440320	1.2454e+06	678.852	3188	3.43482e+06	2247	471444000	20141204	Plate10	PPARG	0.820849
Plate5.C5	1006	560844352	1136921	493.301	2621	2.38902e+06	1941	455818336	20141113	Plate5	PPARG	0.58364
Plate5.C6	987	631883712	1.26987e+06	497.596	2744	2.56653e+06	2025	520579264	20141113	Plate5	PPARG	0.572617
Plate5.C7	1088	689444672	1.5205e+06	453.434	2978	2707505	2225	632616192	20141113	Plate5	PPARG	0.631213
Plate5.C5	973	571707328	1.12214e+06	509.48	3292	2.30647e+06	2397	375793664	20141204	Plate5	PPARG	0.583042
Plate5.C6	1094	691658048	1117390	618.994	2908	2.81026e+06	2069	392629120	20141204	Plate5	PPARG	0.655548
Plate5.C7	1081	716458240	1.21091e+06	591.668	3142	2.76801e+06	2252	430333440	20141204	Plate5	PPARG	0.647758
Plate6.G10	853	462870496	972970	475.73	2120	2.05902e+06	1531	454347392	20141113	Plate6	PPARG	0.523902
Plate6.G8	808	377689472	938812	402.306	2181	1.7373e+06	1569	365155168	20141113	Plate6	PPARG	0.496264
Plate6.G9	854	429025440	1.03544e+06	414.341	2210	1.9984e+06	1615	442989728	20141113	Plate6	PPARG	0.524516
Plate6.G10	1266	858165888	1.63165e+06	525.95	3686	3.31598e+06	2737	568275456	20141204	Plate6	PPARG	0.667839
Plate6.G8	1111	898745280	1.79132e+06	501.721	3855	3209603	2875	641472128	20141204	Plate6	PPARG	0.586074
Plate6.G9	1227	917697152	1.82459e+06	502.961	3903	3.30261e+06	2961	705327872	20141204	Plate6	PPARG	0.647266
Plate8.G5	892	211757504	1.6517e+06	128.206	3413	1.40893e+06	2509	641352256	20141113	Plate8	PPARG	0.569362
Plate8.G6	846	221681872	1.61756e+06	137.047	3285	1.44274e+06	2361	630940928	20141113	Plate8	PPARG	0.54
Plate8.G7	906	230520992	1.68055e+06	137.17	3531	1.50909e+06	2567	655298240	20141113	Plate8	PPARG	0.578298
Plate8.G5	1073	811063296	1854808	437.276	4516	2.92093e+06	3385	674082944	20141204	Plate8	PPARG	0.58194
Plate8.G6	1230	1023273088	1854313	551.834	3783	3552538	2813	698872960	20141204	Plate8	PPARG	0.667088
Plate8.G7	1203	857563712	1.42902e+06	600.105	3631	3226735	2662	530795168	20141204	Plate8	PPARG	0.652445
Plate5.B11	1950	1172513152	1.41524e+06	828.49	2933	4.6742e+06	2152	665633024	20141113	Plate5	PRRX1	1.13131
Plate5.C11	1965	1145597440	1438955	796.132	3036	4520234	2254	596453056	20141113	Plate5	PRRX1	1.14001
Plate5.D11	1887	1081696512	1.17433e+06	921.121	2554	4346798	1895	467995616	20141113	Plate5	PRRX1	1.09476
Plate5.B11	2003	1552413184	1.08968e+06	1424.65	2901	5.56958e+06	2081	359673248	20141204	Plate5	PRRX1	1.20024
Plate5.C11	2010	1560539904	1231274	1267.42	3233	5588486	2340	429528320	20141204	Plate5	PRRX1	1.20443
Plate5.D11	1933	1440919680	1.08157e+06	1332.25	2923	5.39379e+06	2096	367762624	20141204	Plate5	PRRX1	1.15829
Plate10.G2	1711	685268736	728836	940.223	2083	3166269	1522	294197024	20141113	Plate10	SNAI2	1.02835
Plate10.G3	1653	766852544	752400	1019.21	2040	3.41318e+06	1457	325969312	20141113	Plate10	SNAI2	0.993489
Plate10.G4	1773	775663680	716216	1083	1977	3.46212e+06	1476	277850016	20141113	Plate10	SNAI2	1.06561
Plate10.G2	1695	1281830528	1.16014e+06	1104.89	2948	4613880	2087	416606624	20141204	Plate10	SNAI2	1.13025
Plate10.G3	1834	1269656064	1.38889e+06	914.154	3653	4550524	2637	525685376	20141204	Plate10	SNAI2	1.22294
Plate10.G4	1655	1181999872	1.39499e+06	847.317	3207	4.40696e+06	2256	531223648	20141204	Plate10	SNAI2	1.10358
Plate8.C2	988	217470736	1.4884e+06	146.111	3295	1.49329e+06	2415	623332096	20141113	Plate8	SOX4	0.630638
Plate8.C3	1091	246716080	1.53139e+06	161.106	3448	1.6049e+06	2552	592867456	20141113	Plate8	SOX4	0.696383
Plate8.C4	1213	278858496	1.25832e+06	221.611	3144	1.81285e+06	2331	465807232	20141113	Plate8	SOX4	0.774255
Plate8.C2	1212	944332480	1.60666e+06	587.761	3689	3.31558e+06	2735	569987904	20141204	Plate8	SOX4	0.657326
Plate8.C3	1645	1237185664	1867508	662.479	4141	4343778	3119	708945792	20141204	Plate8	SOX4	0.892163
Plate8.C4	1404	942501504	1.6175e+06	582.692	3829	3.45029e+06	2837	569433920	20141204	Plate8	SOX4	0.761457
Plate10.B5	1502	735872576	722604	1018.36	1875	3222221	1394	287990848	20141113	Plate10	TSC22D3	0.902735
Plate10.B6	1493	629306368	654307	961.791	1846	2.88936e+06	1357	306255552	20141113	Plate10	TSC22D3	0.897325
Plate10.B7	1512	566542016	538259	1052.55	1666	2.74356e+06	1216	226362880	20141113	Plate10	TSC22D3	0.908745
Plate10.B5	1596	1168449280	1.43456e+06	814.5	3464	4.34115e+06	2401	511048192	20141204	Plate10	TSC22D3	1.06424
Plate10.B6	1826	1415602048	2.0661e+06	685.158	3877	5.07143e+06	2891	860227968	20141204	Plate10	TSC22D3	1.2176
Plate10.B7	1812	1173445632	1.76769e+06	663.83	3715	4495770	2729	672198336	20141204	Plate10	TSC22D3	1.20827
Plate10.E5	2101	983159680	932077	1054.81	2382	4244640	1701	387729120	20141113	Plate10	ZFP36L2	1.26275
Plate10.E6	2121	935139776	817078	1144.49	2049	4164804	1467	347733792	20141113	Plate10	ZFP36L2	1.27477
Plate10.E7	2061	869352448	726571	1196.51	2015	3.97827e+06	1474	336345216	20141113	Plate10	ZFP36L2	1.23871
Plate10.E5	1964	1732713472	2.03908e+06	849.751	4151	5.65125e+06	3124	800265728	20141204	Plate10	ZFP36L2	1.30962
Plate10.E6	2004	1742443136	1.44897e+06	1202.54	3278	5580325	2335	545787200	20141204	Plate10	ZFP36L2	1.3363
Plate10.E7	2067	1781140352	1.47012e+06	1211.56	3625	5.89439e+06	2646	579877184	20141204	Plate10	ZFP36L2	1.37831
Plate10.F5	1795	699034816	654391	1068.22	1996	3.36587e+06	1461	266586560	20141113	Plate10	ZNF117	1.07883
Plate10.F6	1787	680794560	680999	999.7	2085	3.29601e+06	1508	273694016	20141113	Plate10	ZNF117	1.07403
Plate10.F7	1723	594260416	688028	863.716	1992	3.02605e+06	1424	323741312	20141113	Plate10	ZNF117	1.03556
Plate10.F5	1522	959538496	1.68799e+06	568.45	3699	3.91516e+06	2690	624908736	20141204	Plate10	ZNF117	1.01489
Plate10.F6	1644	1111180032	1518990	731.526	3661	4.19165e+06	2638	552176256	20141204	Plate10	ZNF117	1.09624
Plate10.F7	1602	1011316672	1.4932e+06	677.28	3624	4.00231e+06	2660	531987904	20141204	Plate10	ZNF117	1.06824
Plate10.F10	1488	601994304	573627	1049.45	1741	2.83824e+06	1250	214006848	20141113	Plate10	ZNF503	0.89432
Plate10.F8	1371	567617856	646839	877.526	1915	2.69188e+06	1408	265123872	20141113	Plate10	ZNF503	0.824001
Plate10.F9	1562	739166464	667868	1106.76	1892	3.31192e+06	1383	296052960	20141113	Plate10	ZNF503	0.938796
Plate10.F10	1737	1041964224	1.32536e+06	786.173	3347	4.25991e+06	2372	462111840	20141204	Plate10	ZNF503	1.15826
Plate10.F8	1660	1096880640	1.28305e+06	854.901	3485	4.27725e+06	2482	428696512	20141204	Plate10	ZNF503	1.10691
Plate10.F9	1460	823412160	1.06606e+06	772.39	2902	3.53408e+06	2045	358127680	20141204	Plate10	ZNF503	0.97355
